# Supplementary material
Source: PubMed Central journal article supplement (PMC2844715)
Supplement: NIHMS90932-supplement-2_si_002.pdf [file NIHMS90932-supplement-2_si_002.pdf]

## Supporting Information

### **“Branch-Selective Reductive Coupling of 2-Vinyl Pyridines and Imines via Rhodium Catalyzed C-C Bond Forming Hydrogenation”**

Venukrishnan Komanduri, Christopher D. Grant and Michael J. Krische\*

*University of Texas at Austin*  
*Department of Chemistry and Biochemistry*  
*Austin, TX 78712*  
*USA*

|                                               |          |
|-----------------------------------------------|----------|
| I. Experimental Section                       | S2-S2    |
| II. Full Characterization Data                | S2-S60   |
| III. Deuterium Labeling Experiment            | S61-S63  |
| IV. X-Ray Crystallographic Data for <b>3a</b> | S64-S87  |
| V. X-Ray Crystallographic Data for <b>3f</b>  | S88-S118 |

## I. Experimental Section

**General:** All reactions were run under an atmosphere of argon, unless otherwise indicated. Anhydrous solvents were transferred by an oven-dried syringe. Flasks were flame-dried and cooled under a stream of nitrogen. Dichloromethane (DCM) was distilled from calcium hydride. Rh(cod)<sub>2</sub>BARF was donated by *Umicore Chemicals* and tri-2-trifurylphosphine was purchased from *Aldrich Chemicals*. The imines were prepared in accordance with literature procedures.<sup>1, 2</sup> All hydrogen-mediated reductive coupling reactions were carried out in 13 x 100 mm test tubes. Analytical thin-layer chromatography (TLC) was carried out using 0.2 mm commercial silica gel plates (DC-Fertigplatten Kieselgel 60 F<sub>254</sub>). Preparative column chromatography employing silica gel was performed according to the method of Still.<sup>3</sup> Solvents for chromatography are listed as volume/volume ratios. Infrared spectra were recorded on a Perkin-Elmer 1600 spectrometer. High-resolution mass spectra (HRMS, CI method) were obtained on a Karatos MS9 and are reported as m/z (relative intensity). Accurate masses are reported for the molecular ion [M] or [M+1] or a suitable fragment ion. Proton nuclear magnetic resonance (<sup>1</sup>H-NMR) spectra were recorded with a Varian Gemini (400 MHz) spectrometer. Chemical shifts are reported in delta (δ) units, parts per million (ppm) downfield from trimethylsilane. Coupling constants are reported in Hertz (Hz). Carbon-13 nuclear magnetic resonance (<sup>13</sup>C-NMR) spectra were recorded with a Varian Gemini 400 (100 MHz) spectrometer. Chemical shifts are reported in delta (δ) units, ppm relative to the center of the triplet at 77.0 ppm for deuteriochloroform. <sup>13</sup>C NMR spectra were routinely run with broadband decoupling.

## II. Full Characterization Data

### 1-(6-Bromo-pyridin-2-yl)-ethanol

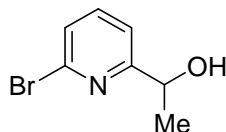

**4a**

The following procedure is an adaptation of a known protocol.<sup>4</sup> To a flame dried 500 mL round bottom flask equipped with a stir bar was added 2,6-dibromopyridine (19.0 g, 80 mmol, 100 mol%). An addition funnel was attached and the vessel was purged with argon. Dry DCM (250 mL) was added and the reaction vessel was cooled to -78 °C using a dry ice/acetone bath. A solution of *n*-BuLi in hexanes (35.5 mL, 2.5 M, 88 mmol, 110 mol%) was added dropwise via addition funnel over a period of 15 minutes. The solution became forest green and was allowed to stir for 1 hour at this temperature. Acetaldehyde (6.7 mL, 120 mmol, 150 mol%) was added

- 
- (1) Stalick, W. E. *et. al. Synth. Commun.*, **2003**, 33, 341.
  - (2) Li, Z. *et. al. Green chem.*, **2006**, 8, 433.
  - (3) Still, W. C.; Kahn, M.; Mitra, A. *J. Org. Chem.*, **1978**, 43, 2923.
  - (4) Peterson, M. A.; Mitchell, J. R. *J. Org. Chem.*, **1997**, 62, 8237.

dropwise over a period of 5 minutes and the reaction was allowed to stir for 30 minutes at -78 °C before it was warmed to room temperature. The color changed from green to brown. Saturated aqueous NH<sub>4</sub>Cl (50 mL) was added and the mixture was extracted with DCM (3 x 50 mL). The combined organic phases were washed with brine (2 x 50 mL), dried (MgSO<sub>4</sub>) and filtered. The solvent was removed *in vacuo* and the resulting residue was purified by flash silica gel column chromatography (R<sub>f</sub> = 0.20, 30% EtOAc/hexanes, gradient: 10 - 30% EtOAc/hexanes) to furnish the title compound (11.4 g, 56.40 mmol) as a brown syrup in 72% yield.

**<sup>1</sup>H NMR** (CDCl<sub>3</sub>): δ 7.55 (t, *J* = 7.5 Hz, 1H), 7.38 (d, *J* = 7.5 Hz, 1H), 4.87-4.97 (m, 1H), 3.35 (br s, 1H), 1.50 (d, *J* = 6.8 Hz, 3H).

**<sup>13</sup>C NMR** (CDCl<sub>3</sub>): δ 165.4, 141.2, 139.4, 126.8, 118.7, 69.3, 24.2.

**HRMS** Calcd. for C<sub>7</sub>H<sub>8</sub>BrNO (M+1): 200.9764, Found: 202.9768.

### 6-Bromo-2-vinyl-pyridine

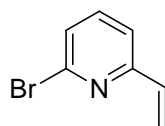

**1a**

This following procedure is an adaptation of a known protocol.<sup>5</sup> Compound **4a** (11.5 g, 56.90 mmol, 100 mol%) was added to a 250 mL round bottom flask equipped with a stir bar. The flask was cooled to 0 °C and concentrated H<sub>2</sub>SO<sub>4</sub> (70 mL, 1260 mmol, 220 mol%) was added slowly. The reaction mixture became black immediately. The flask was fitted with a reflux condenser and purged with argon and then placed in a 110 °C oil bath for 16 hours. The reaction mixture was allowed to reach room temperature and was transferred to a 1 L Erlenmeyer flask containing a large stir bar with the aid of water (approximately 150 mL). The mixture was cooled to 0 °C. Solid NaOH was added in portions until the solution was neutral. At this point, the solution became light brown in color. Any solid materials were removed by filtration and the aqueous solution was extracted with diethyl ether (3 x 50 mL). The combined organic extracts were washed with brine (2 x 50 mL), dried (MgSO<sub>4</sub>) and filtered. The solvent was removed *in vacuo* and the resulting residue was purified by flash silica gel column chromatography to provide the title compound (10.8 g, 58.10 mmol) as a light yellow oil in 74% yield, (R<sub>f</sub> = 0.30, 5% EtOAc/hexanes). **1a** was stored at -10 °C. Spectral data is consistent with prior reports.<sup>6</sup>

**<sup>1</sup>H NMR** (CDCl<sub>3</sub>): δ 7.43 (dd, *J* = 7.7, 7.7 Hz, 1H), 7.27 (d, *J* = 7.7 Hz, 1H), 7.20 (d, *J* = 7.7 Hz, 1H), 6.66 (dd, *J* = 17.3, 10.5 Hz, 1H), 6.17 (dd, *J* = 17.3, 1.1 Hz, 1H), 5.46 (dd, *J* = 10.5, 1.1 Hz, 1H).

**<sup>13</sup>C NMR** (CDCl<sub>3</sub>): δ 157.4, 142.4, 139.1, 135.8, 127, 120.4, 120.3.

**HRMS** Calcd. for C<sub>7</sub>H<sub>6</sub>BrN (M+1): 184.9671, Found: 184.9660.

(5) Chelucci, G. *et. al. Synth. Commun.*, **1992**, 22, 2645.

(6) Abarca, B.; Ballesteros, R.; Blanco, F. *ARKIVOC*, **2007**, iv, 297.

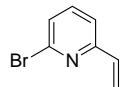

**1a**

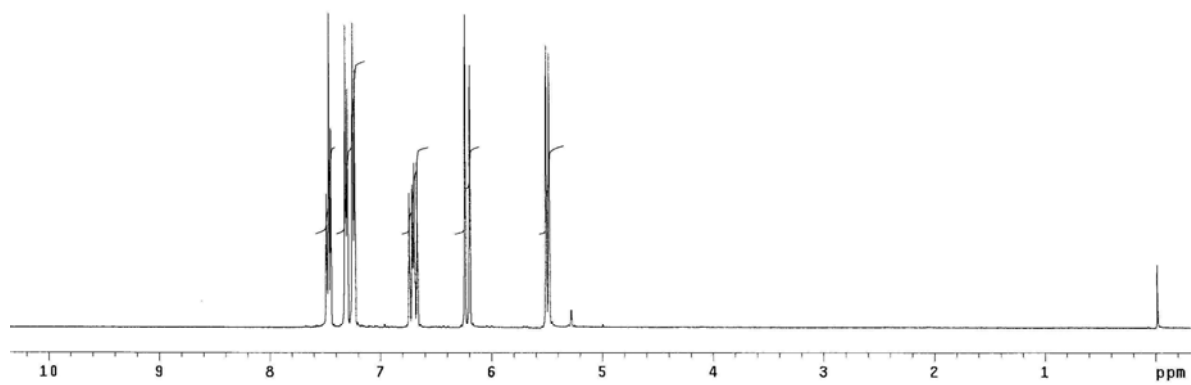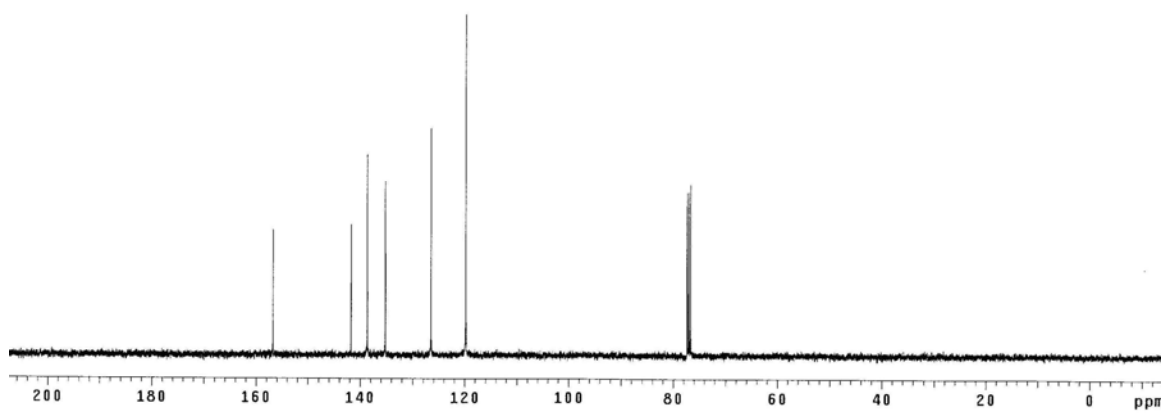

## 6-Phenyl-2-vinylpyridine

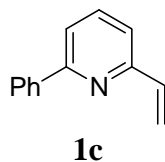

To a degassed solution of 6-bromo-2-vinylpyridine (300 mg, 1.62 mmol, 100 mol%) in toluene (5 mL) in a 50 mL round bottom flask,  $[(\text{Ph}_3\text{P})_4\text{Pd}]$  (94 mg, 0.08 mmol, 5 mol%) was added and stirred for 20 minutes at ambient temperature. A degassed suspension of freshly recrystallized phenylboronic acid (300 mg, 1.95 mmol, 120 mol%) in methanol (3 mL) and an aqueous solution of  $\text{Na}_2\text{CO}_3$  (3 mL, 2 M) were added in succession. The reaction vessel was placed in a 100 °C oil bath and was allowed to stir under an argon atmosphere for 16 hours.<sup>7</sup> The crude reaction mixture was cooled to ambient temperature and extracted with diethyl ether (2 x 20 mL). The combined organic layers were washed with water (20 mL) followed by brine (20 mL), dried ( $\text{Na}_2\text{SO}_4$ ) and filtered. The solvent was removed *in vacuo* and the residue was purified by flash silica gel column chromatography ( $R_f = 0.25$ , 2% EtOAc/hexanes) to furnish the title compound (152 mg, 0.61 mmol) as a colorless oil in 52% yield.

**<sup>1</sup>H NMR** (400 MHz,  $\text{CDCl}_3$ ):  $\delta$  7.98 (d,  $J = 8.4$  Hz, 2H), 7.63 (t,  $J = 7.6$  Hz, 1H), 7.53 (d,  $J = 7.6$  Hz, 1H), 7.41-7.38 (m, 2H), 7.34 (d,  $J = 7.6$  Hz, 1H), 7.20 (dd,  $J = 7.6, 3.2$  Hz, 1H), 6.85-6.78 (m, 1H), 6.28 (dd,  $J = 17.2, 1.2$  Hz, 1H), 5.44 (dd,  $J = 11.2, 1.6$  Hz, 1H).

**<sup>13</sup>C NMR** (100 MHz,  $\text{CDCl}_3$ ):  $\delta$  156.8, 155.4, 139.4, 137.1, 128.8, 128.6, 126.5, 126.9, 119.6, 119.1, 118.2.

**HRMS** Calcd. for  $\text{C}_{13}\text{H}_{11}\text{N}$  ( $M+1$ ): 181.0189, Found: 181.0186.

**FTIR** (NaCl Film): 3058, 1586, 1564, 1456, 1444, 1202, 1160, 922, 821, 764, 690  $\text{cm}^{-1}$ .

---

(7) Chuang C-I. *et. al. Inorg. Chem.*, **1995**, *34*, 2562.

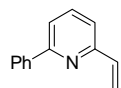

**1c**

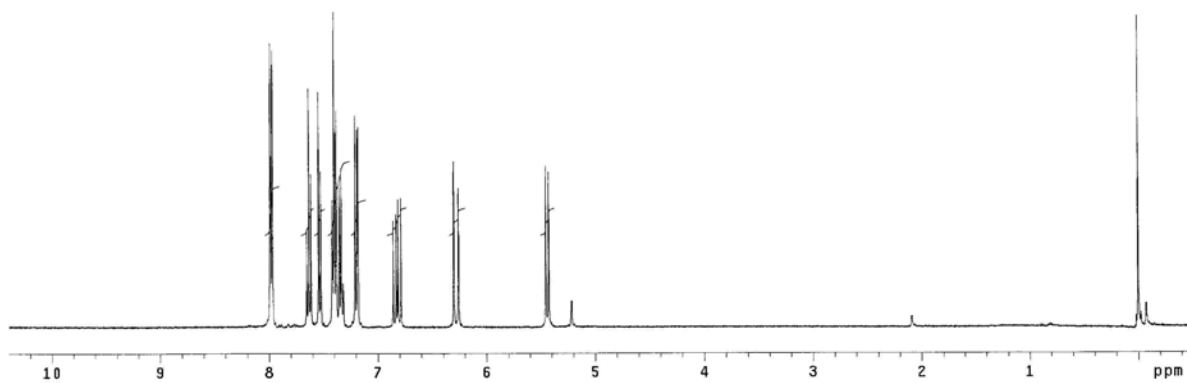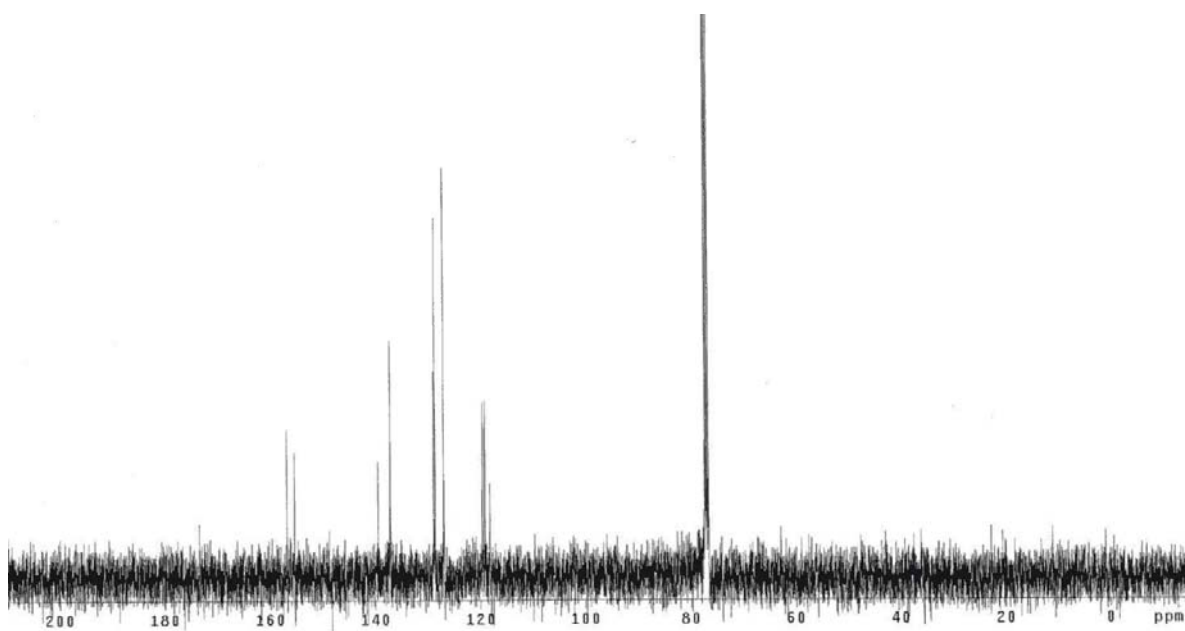

## 6-((*tert*-butyldimethylsilyloxy) methyl)-2-vinylpyridine

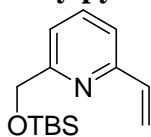

**1d**

A stirred solution of 6-vinylpicolinaldehyde<sup>8</sup> (540 mg, 4.06 mmol, 100 mol%) in THF (5 mL) in a 50 mL round bottomed flask was cooled to 0 °C and sodium borohydride (75 mg, 2.02 mmol, 50 mol%) was added and stirring was continued for 15 minutes at 0 °C. The reaction mixture was quenched with aqueous HCl (0.5 mL, 0.1 M), diluted with water (20 mL) and the resulting mixture was extracted with EtOAc (2 x 15 mL). The combined organic layers were washed with water (20 mL) and brine (20 mL), dried (Na<sub>2</sub>SO<sub>4</sub>) and filtered. The solvent was removed *in vacuo* and the crude alcohol (480 mg) was used directly in the subsequent next step.

The crude alcohol (480 mg, 3.55 mmol, 100 mol%) was dissolved in DMF (6 mL) in a 50 mL round bottom flask and cooled to 0 °C. Imidazole (360 mg, 5.33 mmol, 150 mol%) and *tert*-butyldimethylsilyl chloride (800 mg, 5.33 mmol, 150 mol%) were added and the reaction was allowed to warm to ambient temperature and stirring was continued for 5 hours under an argon atmosphere. Once the reaction was complete it was diluted with water (20 mL) and extracted with diethyl ether (2 x 20 mL). The organic layer was separated, washed with brine (20 mL), dried (anhydrous Na<sub>2</sub>SO<sub>4</sub>) and filtered. The solvent was removed *in vacuo* and the residue was purified by flash silica gel column chromatography (R<sub>f</sub> = 0.23, 5% diethyl ether/hexanes) to furnish the title compound (620 mg, 2.47 mmol) as a colorless oil in 62% yield over two steps.

**<sup>1</sup>H NMR** (400 MHz, CDCl<sub>3</sub>): δ 7.60 (t, *J* = 7.6 Hz, 1H), 7.34 (d, *J* = 8.0 Hz, 1H), 7.16 (d, *J* = 8.0 Hz, 1H), 6.74 (ddd, *J* = 17.6, 10.8, 1.2 Hz, 1H), 6.10 (dd, *J* = 17.6, 1.2, 1H), 5.40 (dd, *J* = 11.2, 1.6 Hz, 1H), 4.74 (s, 2H), 0.92 (s, 9H), 0.08 (s, 6H).

**<sup>13</sup>C NMR** (100 MHz, CDCl<sub>3</sub>): δ 161.1, 154.6, 137.0, 136.9, 119.0, 118.6, 117.9, 66.1, 25.8, 18.3, -5.4.

**HRMS** Calcd. for C<sub>14</sub>H<sub>23</sub>NOSi (M+1): 250.1627, Found: 250.1632.

**FTIR** (NaCl Film): 2954, 2928, 2885, 2856, 1582, 1471, 1450, 1254, 1152, 1113, 989, 929, 835, 808, 775, 749 cm<sup>-1</sup>.

(8) He, W. *et. al. Bioorg. Med. Chem. Lett.*, **2006**, *16*, 2109.

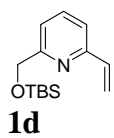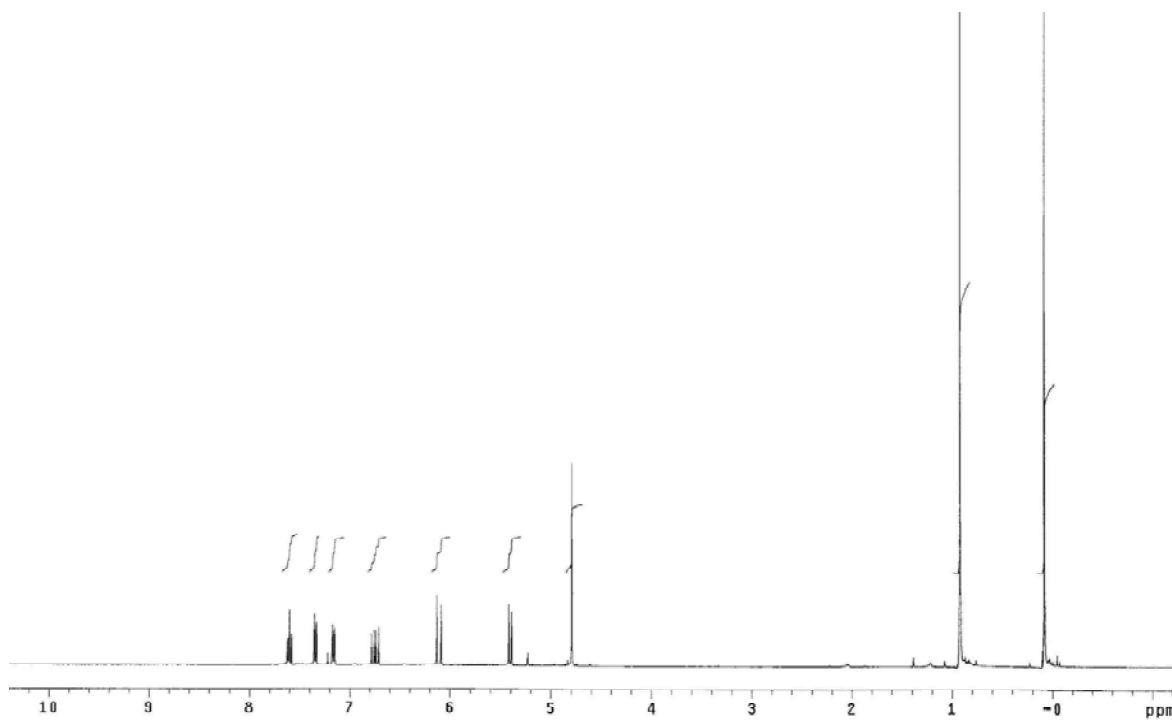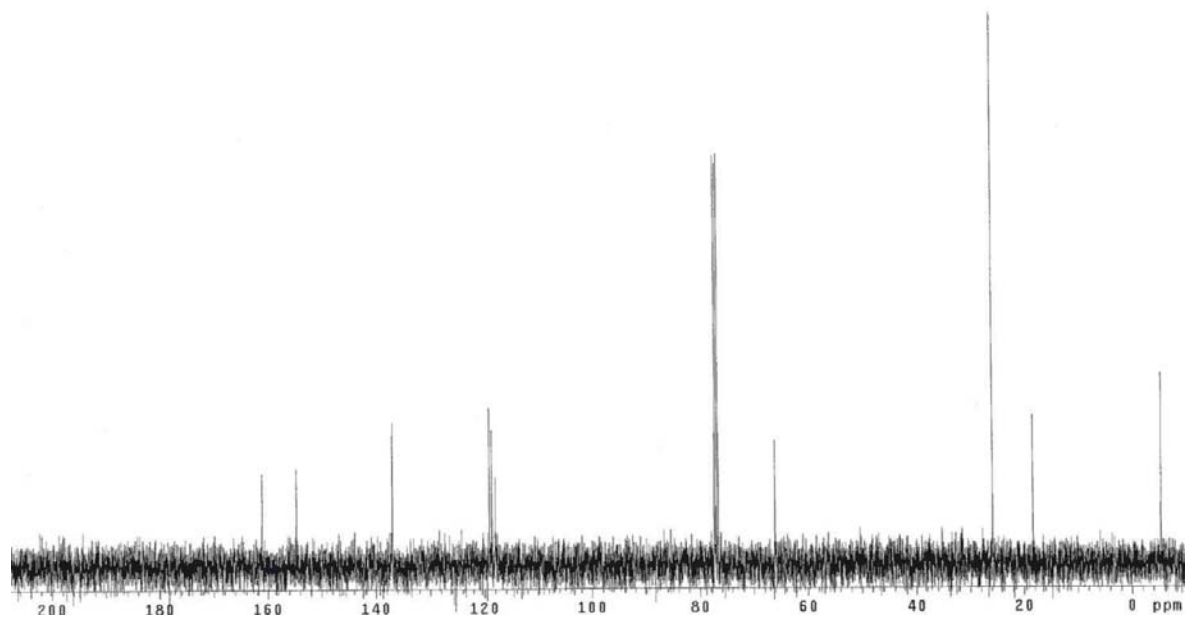



## 8-(benzoxo)-2-vinylquinoline

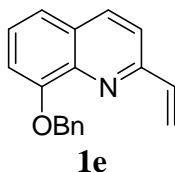

To a stirred suspension of methyltriphenylphosphonium bromide (4.46 g, 12.5 mmol, 110 mol%) in THF (20 mL) at 0 °C in a 100 mL round bottom flask was added a THF solution (1 M) of LHMDS (12.5 mL, 12.5 mmol, 110 mol%). The mixture was allowed to stir under an argon atmosphere for 45 minutes, at which point a THF solution (12 mL) of 8-(benzyloxy)quinoline-2-carbaldehyde<sup>9</sup> (3.01 g, 11.35 mmol, 100 mol%) at 0 °C was added. The reaction mixture was allowed to warm to ambient temperature and was allowed to stir for 30 minutes. Saturated aqueous NH<sub>4</sub>Cl (15 mL) was added and the resulting mixture was extracted with diethyl ether (2 x 50 mL). The organic layer was separated, washed with brine solution (20 mL) dried (Na<sub>2</sub>SO<sub>4</sub>), and filtered. The solvent was removed *in vacuo* and the title compound was purified by flash silica gel column chromatography (R<sub>f</sub> = 0.30, 5% EtOAc /hexanes) to furnish the title compound (2.11 g, 8.05 mmol) as a thick brown oil in 68% yield.

**<sup>1</sup>H NMR** (400 MHz, CDCl<sub>3</sub>): δ 8.00 (dd, *J* = 8.8, 1.6 Hz, 1H), 7.60 (dd, *J* = 8.4, 1.6 Hz, 1H), 7.52 (d, *J* = 7.2 Hz, 1H), 7.34 (t, *J* = 7.6 Hz, 1H), 7.29-7.26 (m, 5H), 7.18-7.11 (m, 1H), 6.98 (dd, *J* = 6.8, 2.8 Hz, 1H), 6.22 (d, *J* = 18.0 Hz, 1H), 5.62 (d, *J* = 10.8 Hz, 1H), 5.40 (s, 2H).

**<sup>13</sup>C NMR** (100 MHz, CDCl<sub>3</sub>): δ 154.9, 154.2, 140.0, 138.3, 137.0, 136.0, 128.5, 128.3, 127.5, 126.8, 126.2, 119.7, 119.1, 118.3, 110.6, 70.7.

**HRMS** Calcd. for C<sub>16</sub>H<sub>16</sub>NO (M+1): 262.1232, Found: 262.1235.

**FTIR** (NaCl Film): 3059, 2968, 1598, 1610, 1503, 1458, 1431, 1328, 1263, 1092, 1076, 1015, 931, 878, 860, 754, 730, 694 cm<sup>-1</sup>.

(9) Petkova, E. G. *et. al.*, *Polyhedron*, 2001, 20, 747.

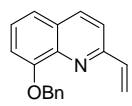

**1e**

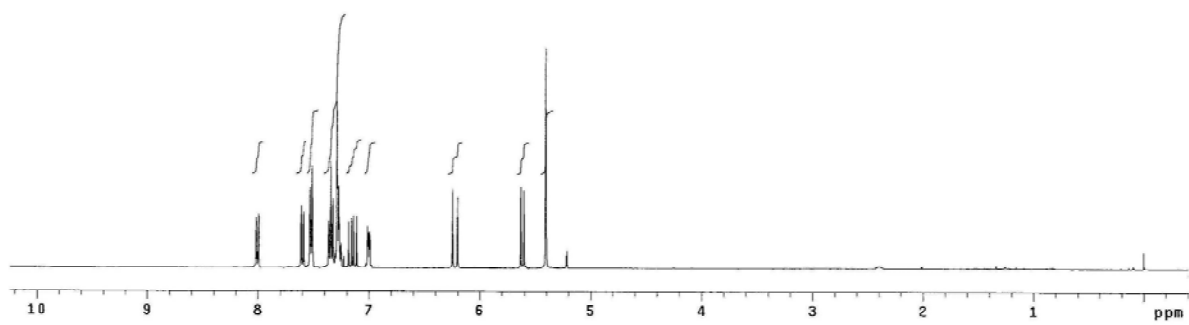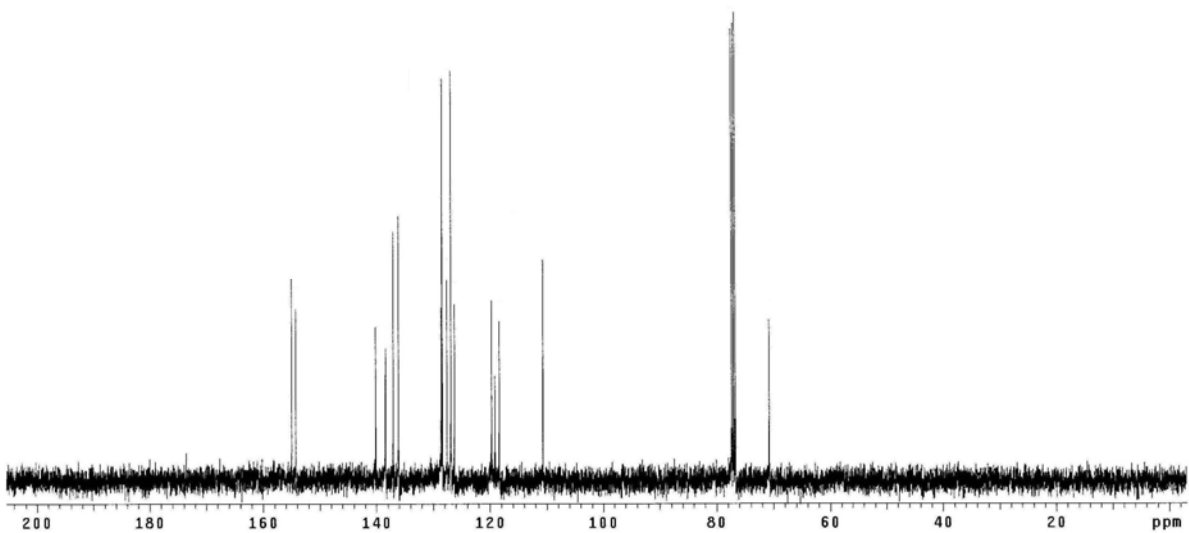

**General Procedure for Hydrogenative Reductive Coupling, Preparation of *N*-((1*R*, 2*R*)-2-(6-bromopyridin-2-yl)-1-(4-nitrophenyl) propyl)-2-methylbenzenesulfonamide**

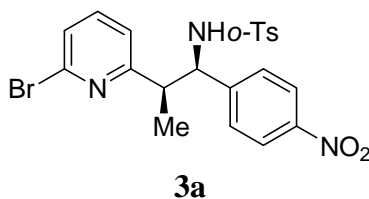

An oven dried test tube (13 x 100 mm) was charged with a stir bar, imine **2a** (80 mg, 0.26 mmol, 100 mol%), [Rh(cod)<sub>2</sub>BARF] (15.6 mg, 13.20 μmol, 5 mol%), tri(2-furyl)phosphine (7.4 mg, 31.70 μmol, 12 mol%), and anhydrous sodium sulfate (75 mg, 0.53 mmol, 200 mol%). The vessel was sealed with a rubber septum, evacuated and placed under an argon atmosphere. A degassed solution of 6-bromo-2-vinylpyridine **1a** (144 mg, 0.79 mmol) in DCM (0.9 mL) was added to the reaction vessel via syringe and the solution was sparged with argon for 5 seconds. The solution was stirred until homogeneous, at which point hydrogen gas was bubbled directly into the solution for 5 seconds with the aid of a balloon using an 1½ inch 21 gauge needle. The needle was pulled above the solution and the reaction mixture was allowed to stir under a hydrogen atmosphere for 72 hr. The reaction mixture was concentrated and the title compound (128 mg, 0.196 mmol) was isolated as a pale yellow solid in 97% yield after purification by flash silica gel column chromatography (separable mixture of diastereomers in 3:1 ratio,  $R_{f \text{ major}} = 0.23$ ,  $R_{f \text{ minor}} = 0.27$ , 25% EtOAc/hexanes, gradient: 10 - 25% EtOAc/hexanes).

**<sup>1</sup>H NMR** (400 MHz, CDCl<sub>3</sub>, Major Isomer): δ 7.76 (d,  $J = 8.4$  Hz, 2H), 7.55 (d,  $J = 7.6$  Hz, 1H), 7.30-7.19 (m, 3H), 6.98-7.12 (m, 2H), 6.91 (d,  $J = 8.8$  Hz, 2H), 6.78 (d,  $J = 6.8$  Hz, 1H), 6.67 (d,  $J = 6.8$  Hz, 1H), 4.69 (t,  $J = 6.4$  Hz, 1H), 3.22 (quintet,  $J = 6.8$  Hz, 1H), 2.49 (s, 3H), 1.20 (d,  $J = 7.2$  Hz, 3H).

**<sup>13</sup>C NMR** (100 MHz, CDCl<sub>3</sub>): δ 162.1, 146.8, 146.0, 141.2, 139.0, 137.9, 136.5, 132.6, 132.2, 129.0, 128.2, 126.6, 126.1, 125.9, 122.8, 121.1, 61.6, 45.3, 20.4, 15.7.

**HRMS** Cald. for C<sub>21</sub>H<sub>20</sub>BrN<sub>3</sub>O<sub>4</sub>S (M+1): 490.0358, Found: 490.0331.

**FTIR** (NaCl Film): 3286, 2952, 2850, 1606, 1581, 1519, 1434, 1346, 1159, 131, 1066, 910, 853, 760, 733 cm<sup>-1</sup>.

**MP** = 143-145 °C.

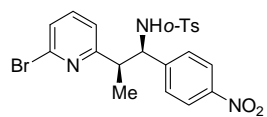

**3a, major**

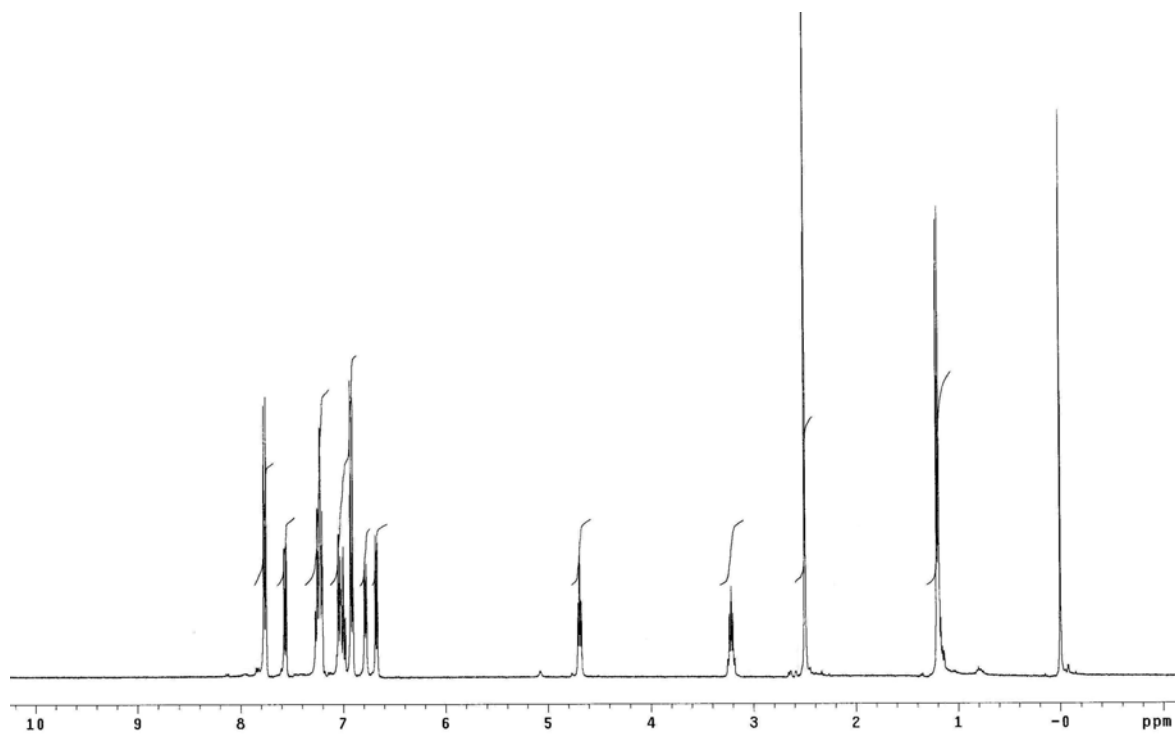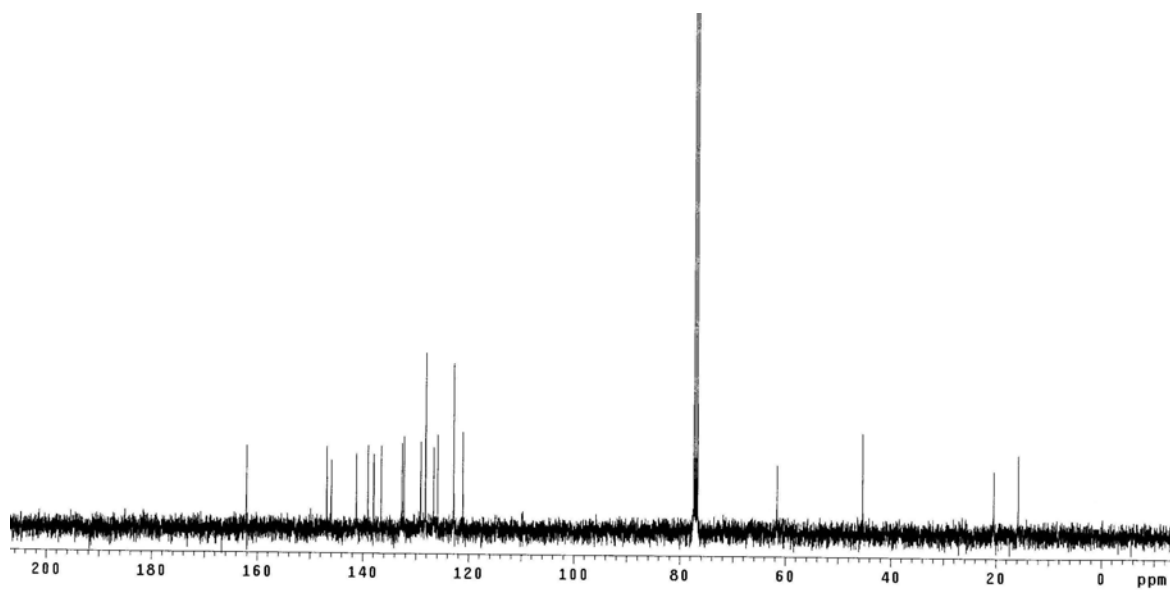

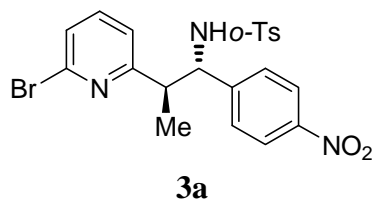

**<sup>1</sup>H NMR** (400 MHz, CDCl<sub>3</sub>, Minor Isomer): δ 7.91 (d, *J* = 8.4 Hz, 2H), 7.66 (d, *J* = 7.6 Hz, 1H), 7.34-7.24 (m, 5H), 7.21 (t, *J* = 9.6 Hz, 1H), 7.10 (d, *J* = 9.2 Hz, 2H), 6.73-6.70 (m, 1H), 4.75 (t, *J* = 5.6 Hz, 1H), 3.15-3.08 (m, 1H), 2.67 (s, 3H), 1.24 (d, *J* = 7.2 Hz, 3H).

**<sup>13</sup>C NMR** (100 MHz, CDCl<sub>3</sub>): δ 162.6, 147.9, 146.8, 146.1, 141.4, 139.3, 138.6, 136.4, 132.4, 132.3, 128.6, 127.3, 126.8, 126.1, 125.8, 123.2, 122.1, 61.8, 46.2, 20.4, 14.8.

**HRMS** Calcd. for C<sub>21</sub>H<sub>20</sub>BrN<sub>3</sub>O<sub>4</sub>S (M+1): 490.0358, Found: 490.0329.

**FTIR** (NaCl Film): 3286, 2952, 2850, 1606, 1581, 1519, 1434, 1346, 1159, 131, 1066, 910, 853, 760, 733 cm<sup>-1</sup>.

**MP** = 124-128 °C.

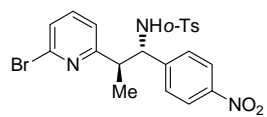

**3a, minor**

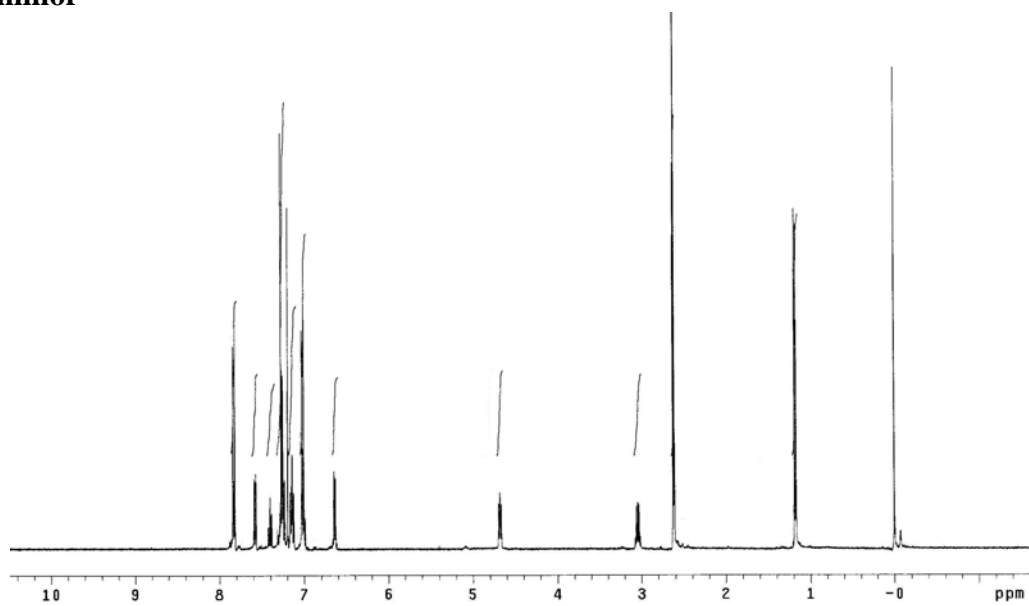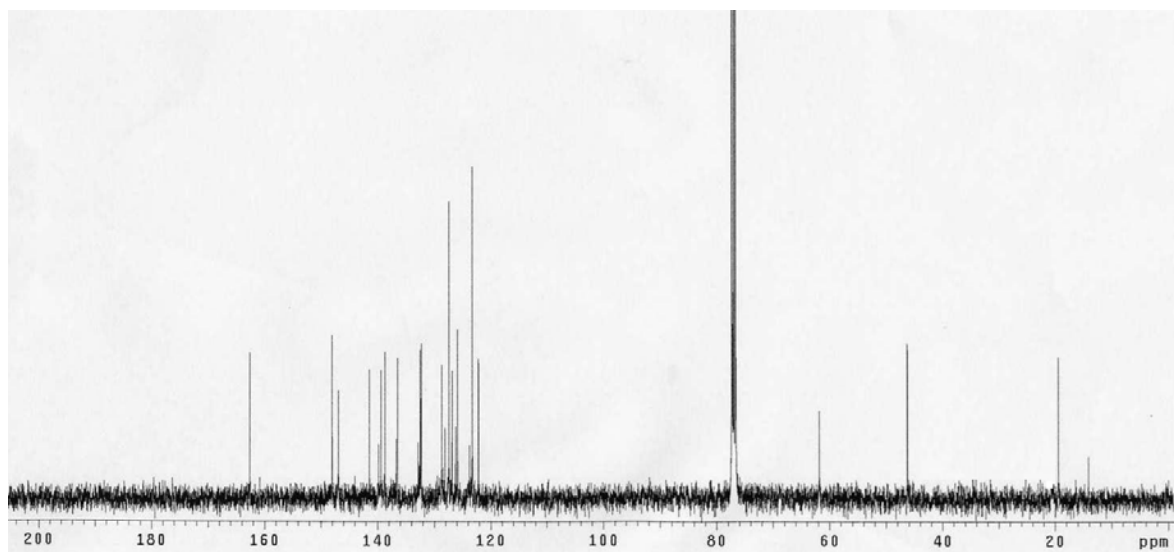

***N*-[2-(6-Bromo-pyridin-2-yl)-1-phenyl-propyl]-4-methyl-benzenesulfonamide**

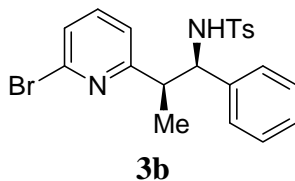

In accordance with the general procedure, 6-bromo-2-vinylpyridine **1a** (144 mg, 0.79 mmol, 300 mol%) was coupled to imine **2b** (68 mg, 0.26 mmol, 100 mol%) to provide the title compound (93 mg, 0.21 mmol) as a colorless liquid in 80% yield after purification by flash silica gel column chromatography (Inseparable mixture of diastereomers in 3:1 ratio,  $R_f = 0.22$ , 20% EtOAc/hexanes, gradient: 10 - 20% EtOAc/hexanes). *Spectral data is reported for the major isomer.*

**<sup>1</sup>H NMR** (400 MHz, CDCl<sub>3</sub>):  $\delta$  7.43 (d,  $J = 8.0$  Hz, 2H), 7.28-7.20 (m, 3H), 7.10-7.08 (m, 2H), 7.04 (d,  $J = 7.6$  Hz, 2H), 6.98-6.95 (m, 2H), 6.77 (dd,  $J = 7.6$  Hz, 1.2 Hz, 1H), 6.26 (d,  $J = 6.4$  Hz, 1H), 4.54 (t,  $J = 6.4$  Hz, 1H), 3.19-3.12 (m, 1H), 2.31 (s, 3H), 1.22 (d,  $J = 6.8$  Hz, 3H).

**<sup>13</sup>C NMR** (100 MHz, CDCl<sub>3</sub>):  $\delta$  163.3, 142.7, 141.2, 139.1, 138.7, 136.9, 129.1, 127.9, 127.1, 127.08, 126.9, 126.1, 121.2, 61.9, 46.4, 21.4, 14.9.

**HRMS** Calcd. for C<sub>21</sub>H<sub>21</sub>BrN<sub>2</sub>O<sub>2</sub>S (M+1): 444.0507, Found: 445.0580.

**FTIR** (NaCl Film): 3276, 2980, 2895, 1581, 1598, 1454, 1432, 1322, 1155, 1123, 1091, 1155, 1123, 811, 678 cm<sup>-1</sup>.





***N*-[2-(6-Bromo-pyridin-2-yl)-1-(4-methoxy-phenyl)-propyl]-4-methyl-benzenesulfonamide**

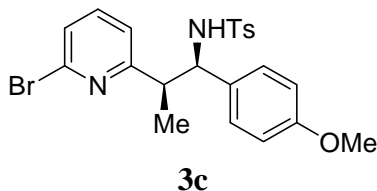

In accordance with the general procedure, 6-bromo-2-vinylpyridine **1a** (144 mg, 0.79 mmol, 300 mol%) was coupled to imine **2c** (76 mg, 0.26 mmol, 100 mol%) to provide the title compound (88 mg, 0.18 mmol) as a colorless liquid in 72% yield after purification by flash silica gel column chromatography (Inseparable mixture of diastereomers in 5:1 ratio,  $R_f = 0.25$ , 30% EtOAc/hexanes, gradient: 10 - 30% EtOAc/hexanes). *Spectral data is reported for the major isomer.*

**<sup>1</sup>H NMR** (400 MHz, CDCl<sub>3</sub>):  $\delta$  7.38 (d,  $J = 8.0$  Hz, 2H), 7.20-7.12 (m, 2H), 6.97 (d,  $J = 8.0$  Hz, 2H), 6.78 (d,  $J = 8.8$  Hz, 2H), 6.69 (d,  $J = 7.6$  Hz, 1H), 6.52 (dd,  $J = 8.4, 0.8$  Hz, 2H), 6.46 (d,  $J = 6.4$  Hz, 1H), 4.43 (t,  $J = 6.4$  Hz, 1H), 3.63 (s, 3H), 3.06 (quintet,  $J = 6.4$  Hz, 1H), 2.25 (s, 3H), 1.15 (d,  $J = 7.2$  Hz, 3H).

**<sup>13</sup>C NMR** (100 MHz, CDCl<sub>3</sub>):  $\delta$  163.3, 142.7, 141.2, 139.1, 138.7, 136.9, 129.1, 127.9, 127.1, 127.08, 126.9, 126.1, 121.2, 61.9, 55.1, 46.4, 21.4, 14.9.

**HRMS** Calcd. for C<sub>21</sub>H<sub>21</sub>BrN<sub>2</sub>O<sub>2</sub>S (M+1): 444.0507, Found: 445.0580.

**FTIR** (NaCl Film): 3275, 2918, 1581, 1553, 1433, 1409, 1321, 1304, 1248, 1156, 1124, 1032, 833, 705, 666 cm<sup>-1</sup>.

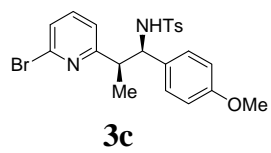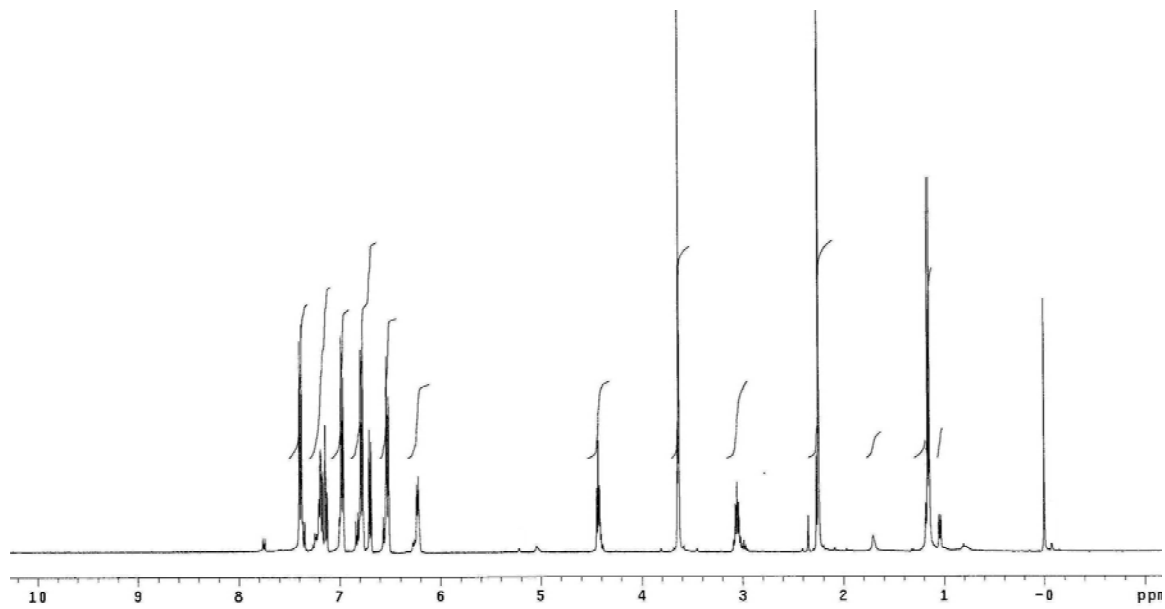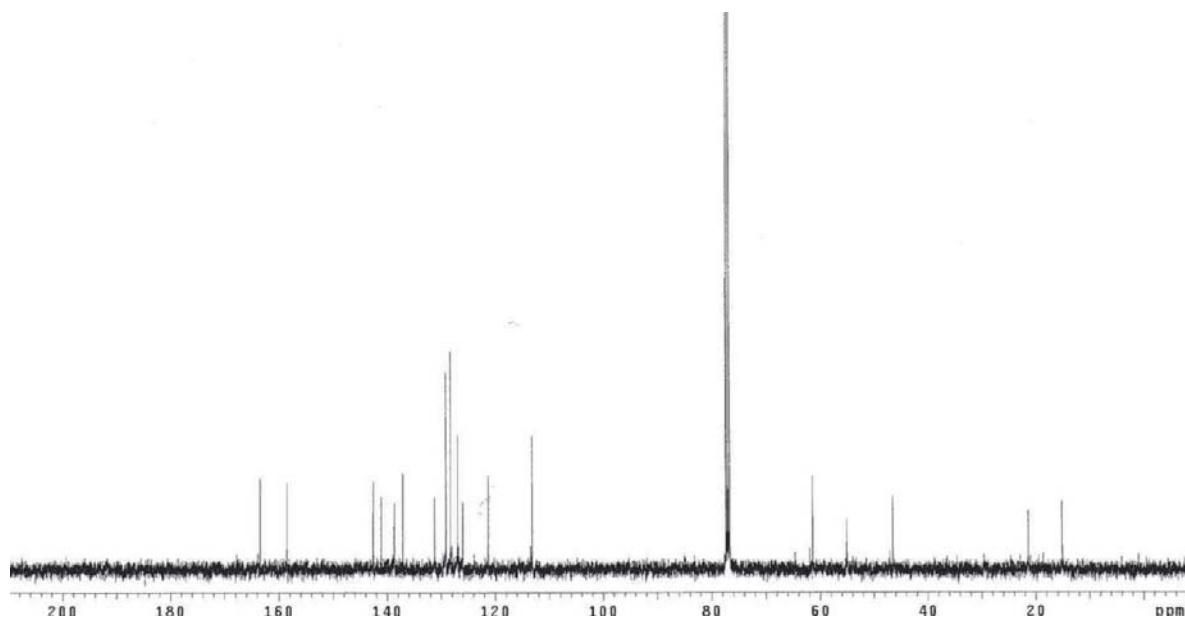

***N*-[1-Benzo [1,3]dioxol-5-yl-2-(6-bromo-pyridin-2-yl)-propyl]-benzenesulfonamide**

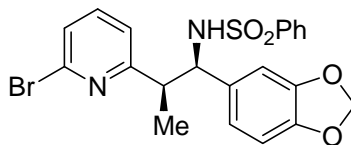

**3d**

In accordance with the general procedure, 6-bromo-2-vinylpyridine **1a** (144 mg, 0.79 mmol, 300 mol%) was coupled to imine **2d** (76 mg, 0.26 mmol, 100 mol%) to provide the title compound (117 mg, 0.24 mmol) as a white solid in 91% yield after purification by flash silica gel column chromatography (Inseparable mixture of diastereomers in 5:1 ratio,  $R_f = 0.45$ , 50% EtOAc, gradient: 10 - 50% EtOAc/hexanes). *Spectral data is reported for the major isomer.*

**<sup>1</sup>H NMR** (400 MHz, CDCl<sub>3</sub>):  $\delta$  7.60 (d,  $J = 7.6$  Hz, 2H), 7.43-7.21 (m, 6H), 6.8 (d,  $J = 7.6$  Hz, 1H), 6.56- 6.40 (m, 4H), 5.84 (d,  $J = 1.6$  Hz, 1H), 5.82 (d,  $J = 8.0$  Hz, 1H), 4.51-4.48 (m, 1H), 3.16-3.09 (m, 1H), 1.24 (d,  $J = 7.2$  Hz, 3H).

**<sup>13</sup>C NMR** (100 MHz, CDCl<sub>3</sub>):  $\delta$  163.2, 147.1, 146.5, 141.1, 139.9, 138.8, 132.9, 132.0, 128.5, 126.9, 126.7, 126.2, 121.3, 120.8, 107.6, 107.5, 100.8, 61.8, 46.3, 15.2.

**HMRS**: Calcd. for C<sub>21</sub>H<sub>19</sub>BrN<sub>2</sub>O<sub>4</sub>S (M+1): 475.0200, Found: 475.0327.

**FTIR** (NaCl film): 3274, 2893, 1581, 1554, 1503, 1489, 1446, 1433, 1371, 1345, 1239, 1157, 1125, 1092, 1037 cm<sup>-1</sup>.

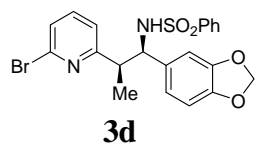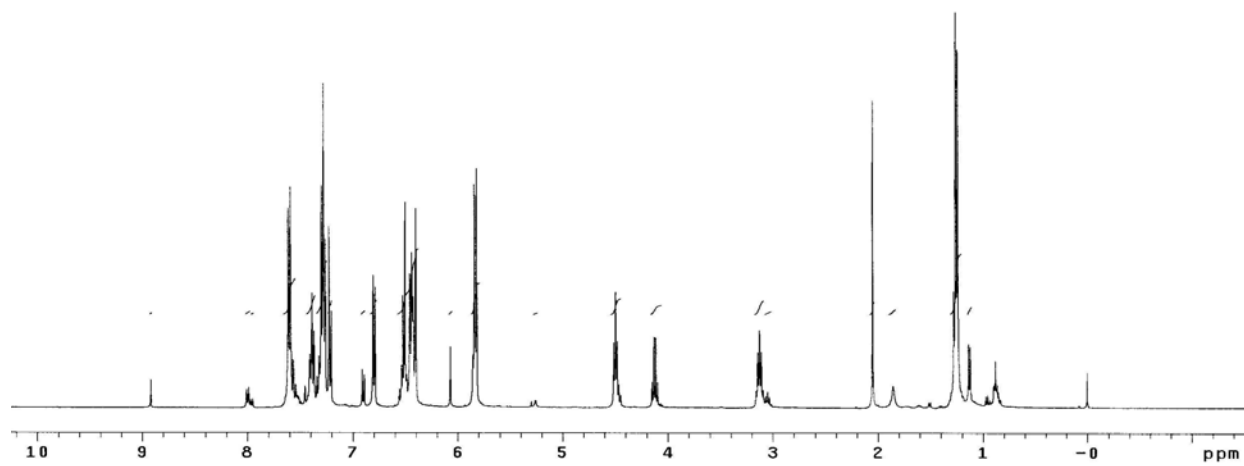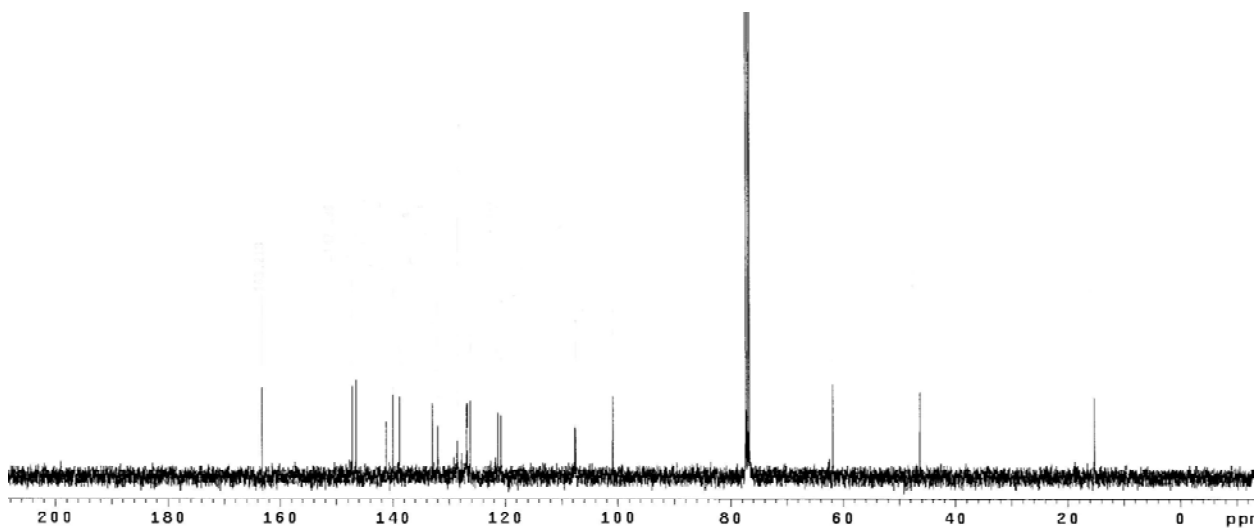

***N*-[2-(6-Bromo-pyridin-2-yl)-1-furan-2-yl-propyl]-4-methyl-benzenesulfonamide**

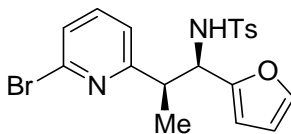

**3e**

In accordance with the general procedure, 6-bromo-2-vinylpyridine **1a** (144 mg, 0.79 mmol, 300 mol%) was coupled to imine **2e** (66 mg, 0.26 mmol, 100 mol%) to provide the title compound (114 mg, 0.26 mmol) as a colorless oil in 99% yield after purification by flash silica gel column chromatography (Inseparable mixture of diastereomers in 4:1 ratio,  $R_f = 0.45$ , 20% EtOAc, gradient: 10 - 20% EtOAc/hexanes). *Spectral data is reported for the major isomer.*

**<sup>1</sup>H NMR** (400 MHz, CDCl<sub>3</sub>):  $\delta$  7.54 (d,  $J = 8.0$  Hz, 2H), 7.39-7.21 (m, 3H), 7.16-7.06 (m, 3H), 6.90 (d,  $J = 7.6$  Hz, 1H), 6.02-6.01 (m, 1H), 5.81 (d,  $J = 8.8$  Hz, 1H), 5.79 (d,  $J = 2.8$  Hz, 1H), 4.68 (dd,  $J = 6.4, 2.0$  Hz, 1H), 3.33-3.26 (m, 1H), 3.34 (s, 3H), 1.33 (d,  $J = 7.4$  Hz, 3H).

**<sup>13</sup>C NMR** (100 MHz, CDCl<sub>3</sub>):  $\delta$  163.4, 152, 143.1, 141.8, 141.4, 138.9, 137.3, 129.5, 127.1, 126.3, 121.3, 110.2, 108.2, 56.4, 45.1, 44.8, 36.2, 21.7, 15.9.

**HMRS**: Calcd. for C<sub>19</sub>H<sub>19</sub>BrN<sub>2</sub>O<sub>3</sub>S (M+1): 435.0368, Found: 435.0373.

**FTIR** (NaCl film): 3271, 2920, 1581, 1554, 1496, 1433, 1410, 1328, 1231, 1156, 1124, 1092, 1048, 1011 cm<sup>-1</sup>.

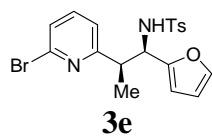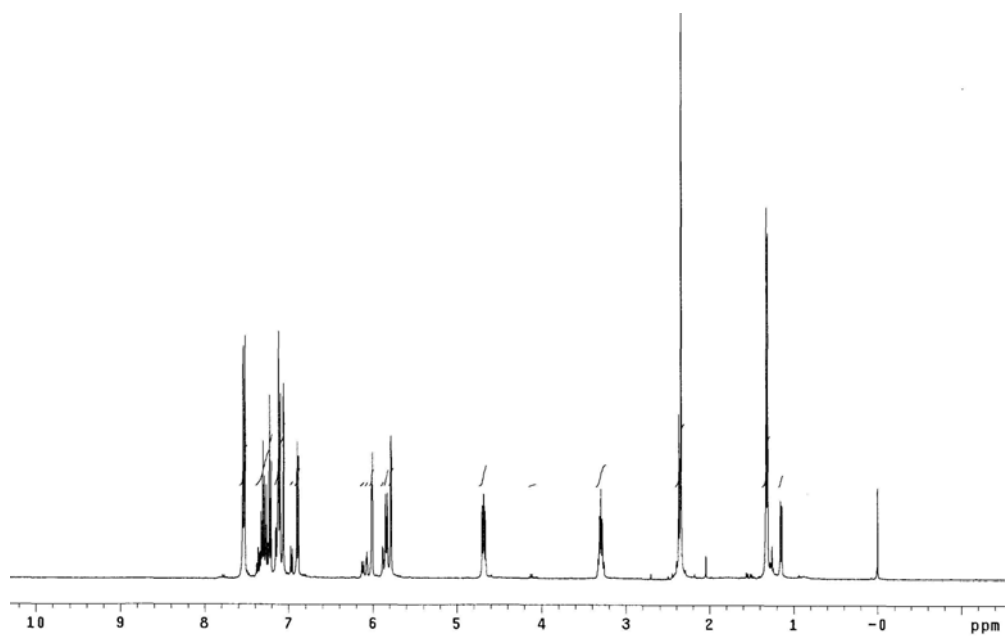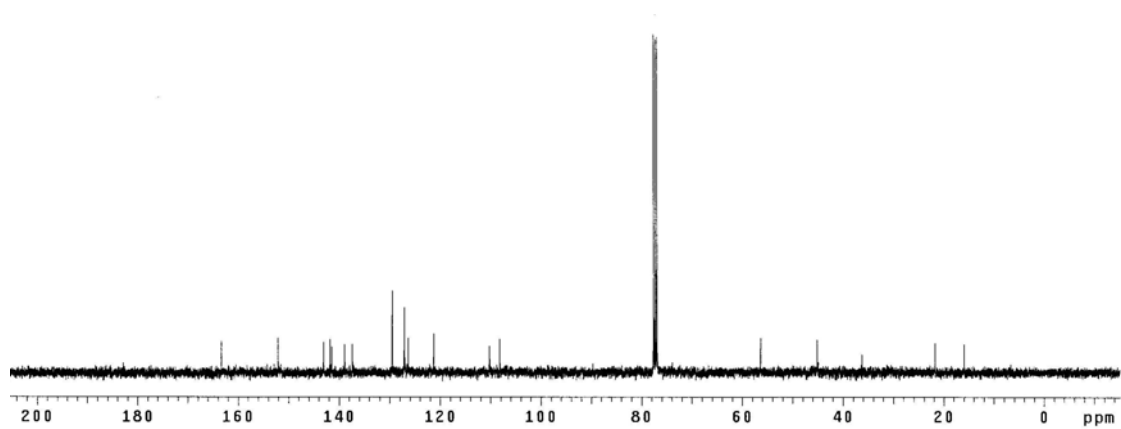

***N*-((1*R*, 2*R*)-2-(6-bromopyridin-2-yl)-1-(thiophen-2-yl)propyl)-4-methylbenzenesulfonamide**

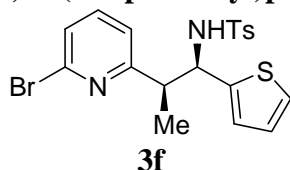

In accordance with the general procedure, 6-bromo-2-vinylpyridine **1a** (73 mg, 0.79 mmol, 300 mol%) was coupled to imine **2f** (70 mg, 0.26 mmol, 100 mol%) to provide the title compound (87 mg, 0.19 mmol) as a white solid in 72% yield after purification by flash silica gel column chromatography (Inseparable mixture of diastereomers in 7:1 ratio,  $R_f = 0.25$ , 20% EtOAc/hexanes, gradient: 10 - 20% EtOAc/hexanes). *Spectral data is reported for the major isomer.*

**<sup>1</sup>H NMR** (400 MHz, CD<sub>3</sub>SOCD<sub>3</sub>):  $\delta$  8.43 (d,  $J = 9.2$  Hz, 1H), 7.43 (d,  $J = 8.4$  Hz, 2H), 7.31 (d,  $J = 7.6$  Hz, 1H), 7.15 (d,  $J = 8.4$  Hz, 2H), 7.10 (dd,  $J = 4.8, 1.6$  Hz, 1H), 7.04 (d,  $J = 7.2$  Hz, 1H), 6.62-6.57 (m, 2H), 4.81 (t,  $J = 9.2$  Hz, 1H), 3.34 (s, 1H), 3.20-3.12 (m, 1H), 2.27 (s, 3H), 1.27 (d,  $J = 7.2$  Hz, 3H).

**<sup>13</sup>C NMR** (100 MHz, CD<sub>3</sub>SOCD<sub>3</sub>):  $\delta$  163.7, 144.3, 141.9, 140.6, 139.5, 138.7, 129.0, 126.0, 125.8, 124.7, 124.5, 122.4, 57.1, 47.8, 20.9, 17.4.

**HRMS** Calcd. for C<sub>21</sub>H<sub>19</sub>BrN<sub>2</sub>O<sub>2</sub>S<sub>2</sub> (M+1): 451.0071, Found: 451.0075.

**FTIR** (NaCl Film): 3273, 2973, 2925, 1586, 1434, 1356, 1328, 1264, 1161, 1091, 895, 814, 733, 703 cm<sup>-1</sup>.

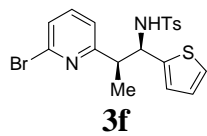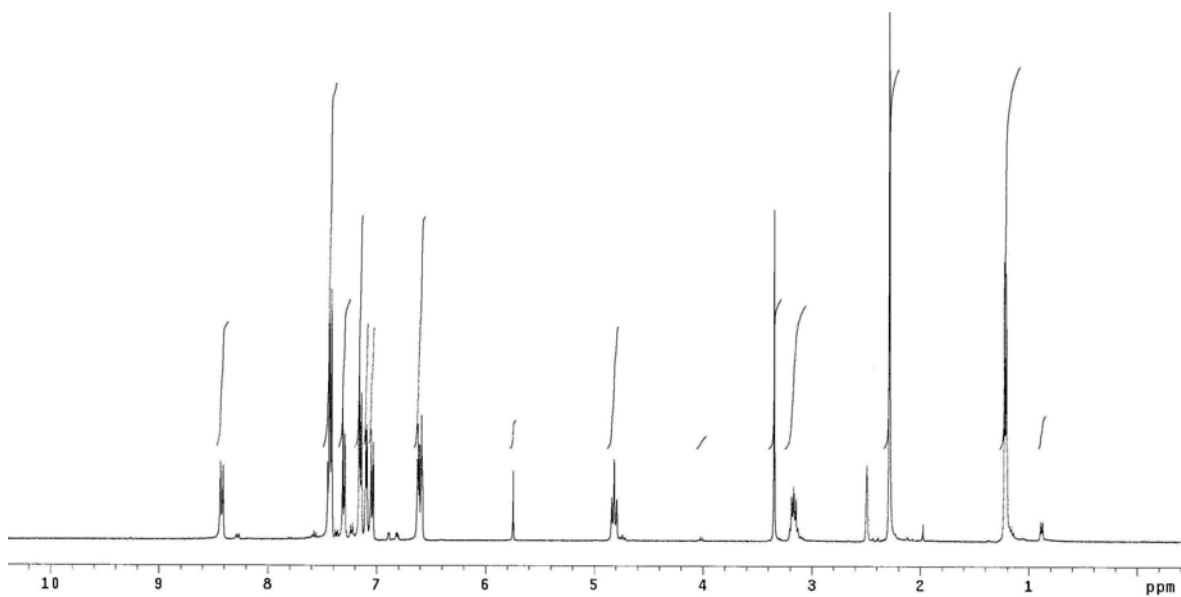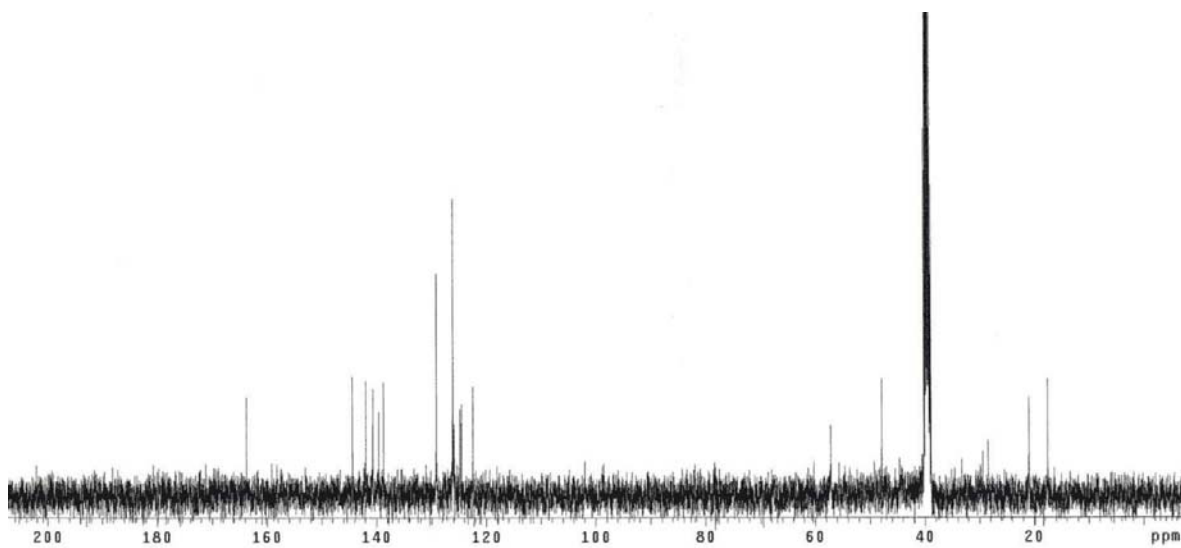



***N*-{1-[1-(6-Bromo-pyridin-2-yl)-ethyl]-3-phenyl-allyl}-4-methyl-benzenesulfonamide**

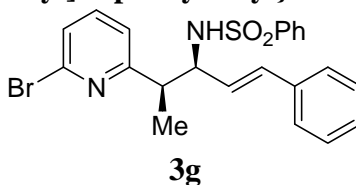

In accordance with the general procedure, 6-bromo-2-vinylpyridine **1a** (144 mg, 0.79 mmol, 300 mol%) was coupled to imine **2g** (72 mg, 0.26 mmol, 100 mol%) to provide the title compound (79 mg, 0.17 mmol) as a white solid in 67% yield after purification by flash silica gel column chromatography (Inseparable mixture of diastereomers in 4:1 ratio,  $R_f = 0.25$ , 25% EtOAc/hexanes, gradient: 10 - 25% EtOAc/hexanes). *Spectral data is reported for the major isomer.*

**<sup>1</sup>H NMR** (400 MHz, CDCl<sub>3</sub>):  $\delta$  7.29 (dd,  $J = 8.0, 0.8$  Hz, 2H), 7.39 (d,  $J = 7.2$  Hz, 2H), 7.34 (d,  $J = 8.0$  Hz, 2H), 7.29 (d,  $J = 5.6$  Hz, 1H), 7.22-7.18 (m, 3H), 7.07-7.01 (m, 3H), 6.27 (d,  $J = 15.6$  Hz, 1H), 6.15 (d,  $J = 7.2$  Hz, 1H), 5.71 (dd,  $J = 16.0, 7.6$  Hz, 1H), 4.18 (ddd,  $J = 8.0, 4.4, 1.2$  Hz, 1H), 3.19-3.12 (m, 1H), 1.30 (d,  $J = 7.2$  Hz, 3H).

**<sup>13</sup>C NMR** (100 MHz, CDCl<sub>3</sub>):  $\delta$  163.4, 141.0, 140.9, 139.0, 136.1, 133.0, 132.1, 128.8, 128.3, 127.7, 127.2, 126.4, 126.3, 126.3, 126.26, 121.13, 60.5, 44.7, 15.5.

**HRMS** Calcd. for C<sub>23</sub>H<sub>23</sub>BrN<sub>2</sub>O<sub>2</sub>S (M+1): 457.0507, Found: 457.0586.

**FTIR** (NaCl Film): 3269, 3058, 2916, 1580, 1553, 1446, 1433, 1324, 1157, 1125, 1092, 984, 833, 721, 688 cm<sup>-1</sup>.

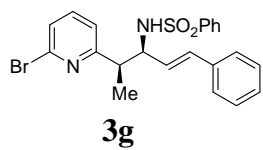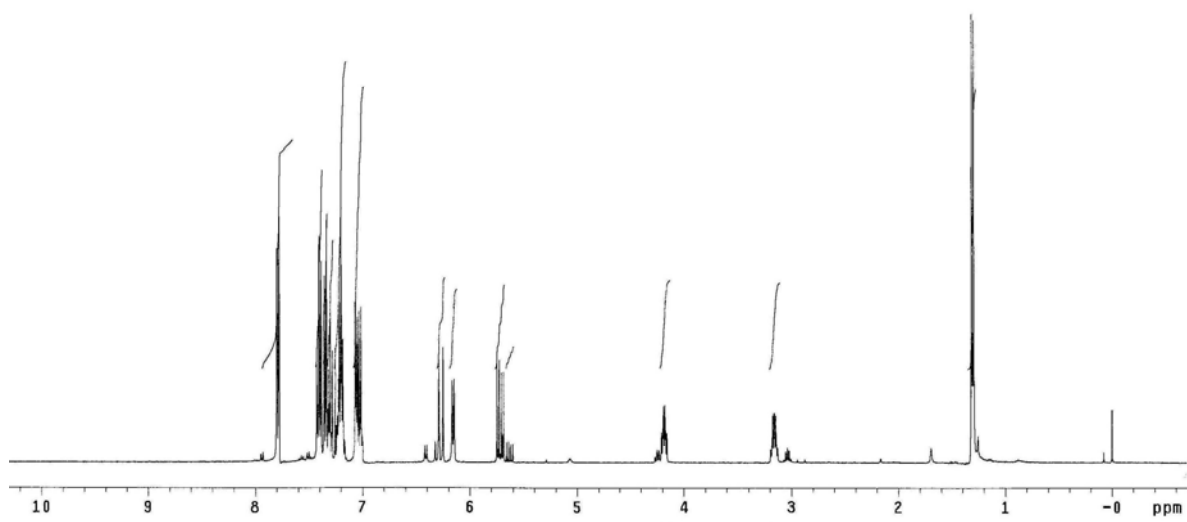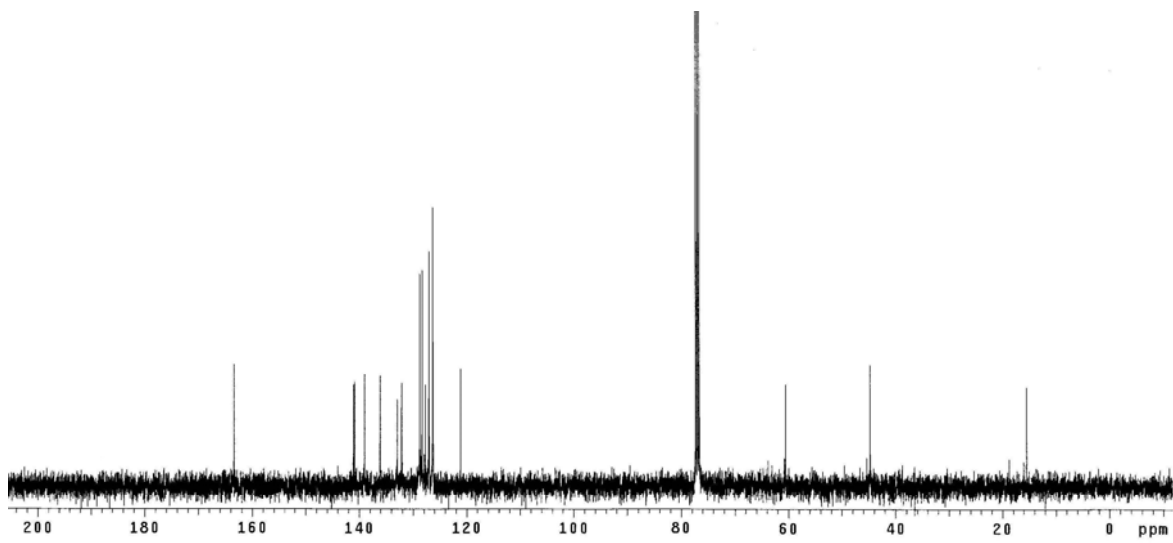

***N*-{1-[1-(6-Bromo-pyridin-2-yl)-ethyl]-butyl}-4-methyl-benzenesulfonamide**

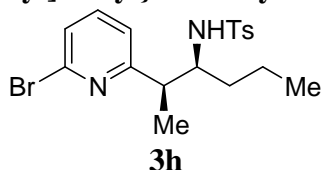

In accordance with the general procedure, 6-bromo-2-vinylpyridine **1a** (144 mg, 0.79 mmol, 300 mol%) was coupled to imine **2h** (62 mg, 0.26 mmol, 100 mol%) to provide the title compound (71 mg, 0.17 mmol) as a colorless liquid in 63% yield after purification by flash silica gel column chromatography (Inseparable mixture of diastereomers in 8:1 ratio,  $R_f = 0.28$ , 15% EtOAc/hexanes, gradient: 10 - 15% EtOAc/hexanes). *Spectral data is reported for the major isomer.*

**<sup>1</sup>H NMR** (400 MHz, CDCl<sub>3</sub>):  $\delta$  7.88 (d,  $J = 10.4$  Hz, 2H), 7.35 (t,  $J = 8.0$  Hz, 1H), 7.26-7.21 (m, 3H), 6.92 (d,  $J = 7.6$  Hz, 1H), 5.34 (d,  $J = 8.4$  Hz, 1H), 3.48-3.42 (m, 1H), 2.92 (ddd,  $J = 14.4, 7.2, 4.8$  Hz, 1H), 2.41 (s, 3H), 1.42-1.16 (m, 4H), 1.21 (d,  $J = 7.2$  Hz, 3H), 0.78 (t,  $J = 7.2$  Hz, 3H).

**<sup>13</sup>C NMR** (100 MHz, CDCl<sub>3</sub>):  $\delta$  164.2, 142.9, 141.2, 138.6, 137.9, 129.4, 126.9, 125.9, 121.1, 58.2, 43.1, 34.2, 21.5, 18.9, 14.7, 13.7.

**HRMS** Calcd. for C<sub>18</sub>H<sub>23</sub>BrN<sub>2</sub>O<sub>2</sub>S (M+1): 411.0664, Found: 411.0736.

**FTIR** (NaCl Film): 3280, 2959, 2872, 1579, 1553, 1433, 1408, 1323, 1156, 1120, 1092, 812, 706, 664 cm<sup>-1</sup>.

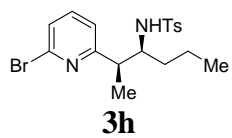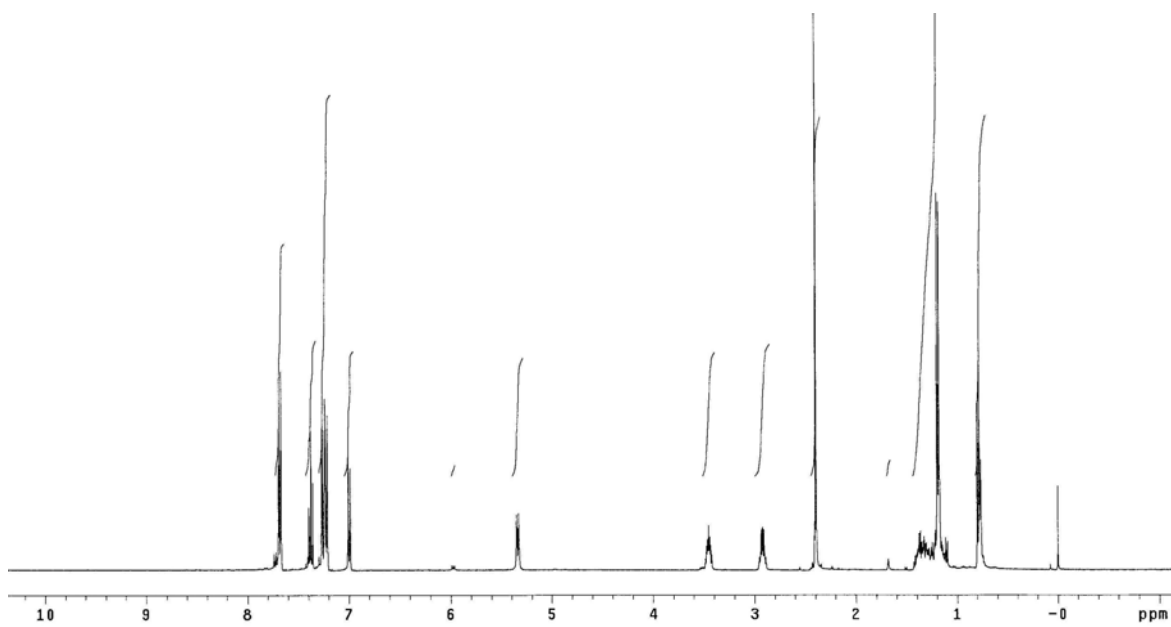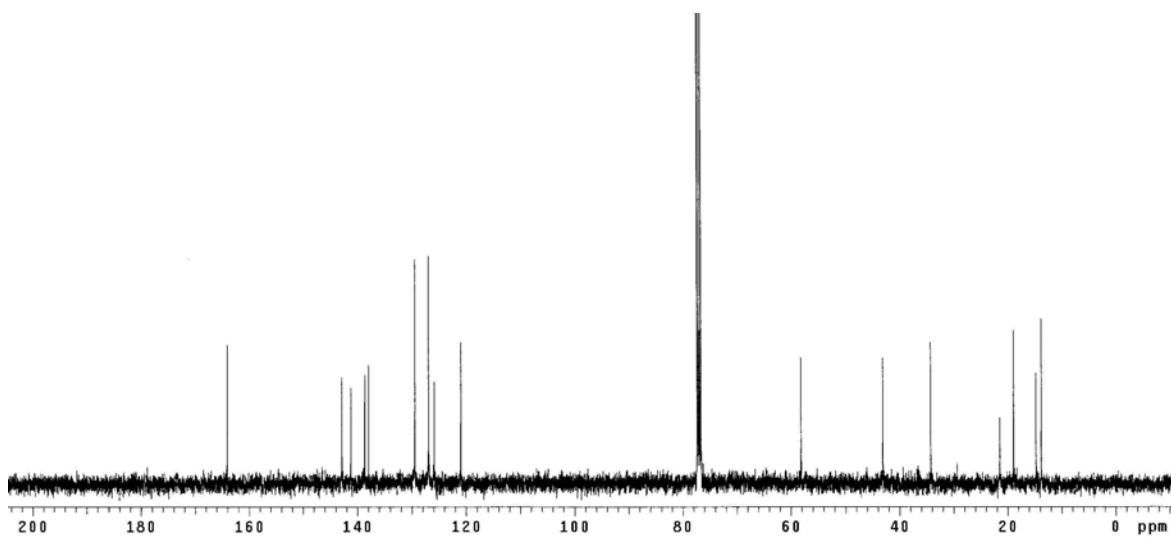

***N*-((2*R*, 3*S*)-2-(6-bromopyridin-2-yl)-5-methylhexan-3-yl)-4-methylbenzenesulfonamide**

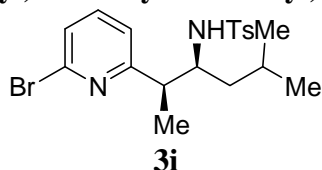

In accordance with the general procedure, 6-bromo-2-vinylpyridine **1a** (144 mg, 0.79 mmol, 300 mol%) was coupled to imine **2i** (63 mg, 0.26 mmol, 100 mol%) to provide the title compound (82 mg, 0.19 mmol) as a colorless liquid in 74% yield after purification by flash silica gel column chromatography (Inseparable mixture of diastereomers in 6:1 ratio,  $R_f = 0.25$ , 20% EtOAc/hexanes, gradient: 10 - 20% EtOAc/hexanes). *Spectral data is reported for the major isomer.*

**<sup>1</sup>H NMR** (400 MHz, CDCl<sub>3</sub>):  $\delta$  7.70 (d,  $J = 8.4$  Hz, 2H), 7.38 (t,  $J = 7.6$  Hz, 1H), 7.27-7.22 (m, 3H), 6.95 (d,  $J = 7.2$  Hz, 1H), 5.43 (dd,  $J = 8.4, 1.6$  Hz, 1H), 3.53-3.46 (m, 1H), 2.91 (ddd,  $J = 14.4, 6.8, 4.0$  Hz, 1H), 2.35 (s, 3H), 1.58-1.42 (m, 2H), 1.17 (d,  $J = 7.2$  Hz, 3H), 1.15-1.10 (m, 1H), 0.80 (d,  $J = 6.8$  Hz, 3H), 0.77 (d,  $J = 6.4$  Hz, 3H).

**<sup>13</sup>C NMR** (100 MHz, CDCl<sub>3</sub>):  $\delta$  163.9, 142.5, 141.0, 138.6, 137.9, 129.4, 126.9, 125.8, 120.9, 56.4, 42.8, 41.1, 24.1, 22.9, 21.7, 21.4, 14.5.

**HRMS** Calcd. for C<sub>19</sub>H<sub>25</sub>BrN<sub>2</sub>O<sub>2</sub>S (M+1): 425.0820, Found: 425.0818.

**FTIR** (NaCl Film): 3275, 2948, 2876, 1578, 1543, 1433, 1408, 1320, 1159, 1123, 1090, 812, 702, 664 cm<sup>-1</sup>.

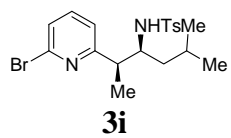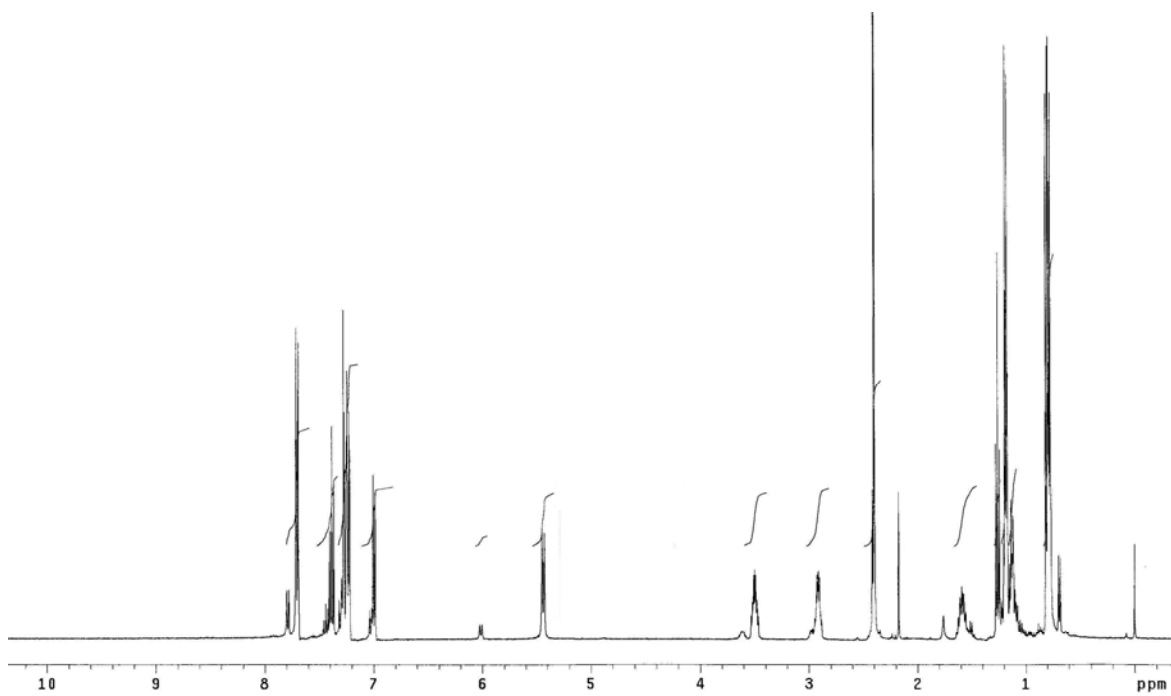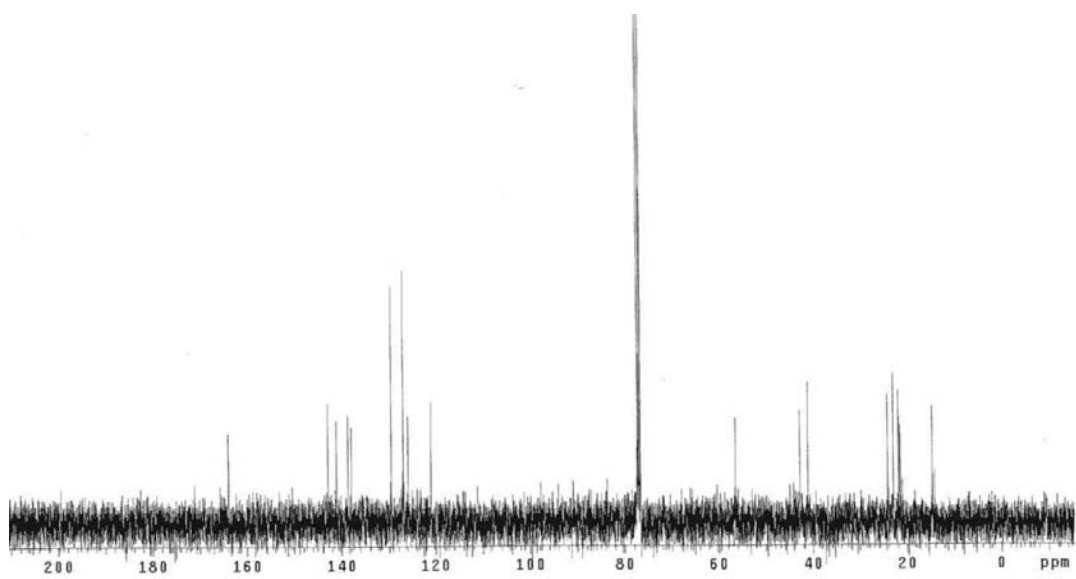

***N*-[1-Benzyloxymethyl-2-(6-bromo-pyridin-2-yl)-propyl]-4-methyl-benzenesulfonamide**

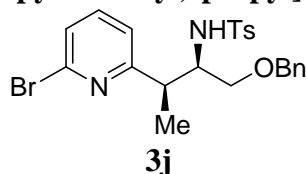

In accordance with the general procedure, 6-bromo-2-vinylpyridine **1a** (144 mg, 0.79 mmol, 300 mol%) was coupled to imine **2j** (80 mg, 0.26 mmol, 100 mol%) to provide the title compound (89 mg, 0.18 mmol) as a colorless liquid in 69% yield after purification by flash silica gel column chromatography (Inseparable mixture of diastereomers in 5:1 ratio,  $R_f = 0.30$ , 15% EtOAc/hexanes, gradient: 10 - 15% EtOAc/hexanes). *Spectral data is reported for the major isomer.*

**<sup>1</sup>H NMR** (400 MHz, CDCl<sub>3</sub>):  $\delta$  7.64 (d,  $J = 8.4$  Hz, 2H), 7.33-7.25 (m, 4H), 7.23-7.16 (m, 5H) 6.97 (d,  $J = 6.8$  Hz, 1H), 5.31 (d,  $J = 8.0$  Hz, 1H), 4.26 (s, 2H), 3.61 (ddd,  $J = 11.6, 5.2, 3.2$  Hz, 1H), 3.23-3.13 (m, 3H), 2.37 (s, 3H), 1.25 (d,  $J = 6.8$  Hz, 3H).

**<sup>13</sup>C NMR** (100 MHz, CDCl<sub>3</sub>):  $\delta$  164.2, 143.0, 141.5, 138.6, 137.6, 137.3, 129.5, 128.3, 127.7, 126.9, 126.8, 125.9, 121.6, 73.1, 69.3, 57.2, 42.1, 21.4, 16.0.

**HRMS** Calcd. for C<sub>23</sub>H<sub>25</sub>BrN<sub>2</sub>O<sub>3</sub>S (M+1): 489.0769, Found: 489.0842.

**FTIR** (NaCl Film): 3279, 3001, 1866, 1580, 1553, 1453, 1432, 1328, 1117, 1087, 1022, 812, 794, 736, 664 cm<sup>-1</sup>.

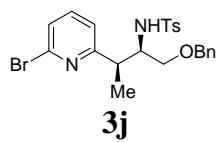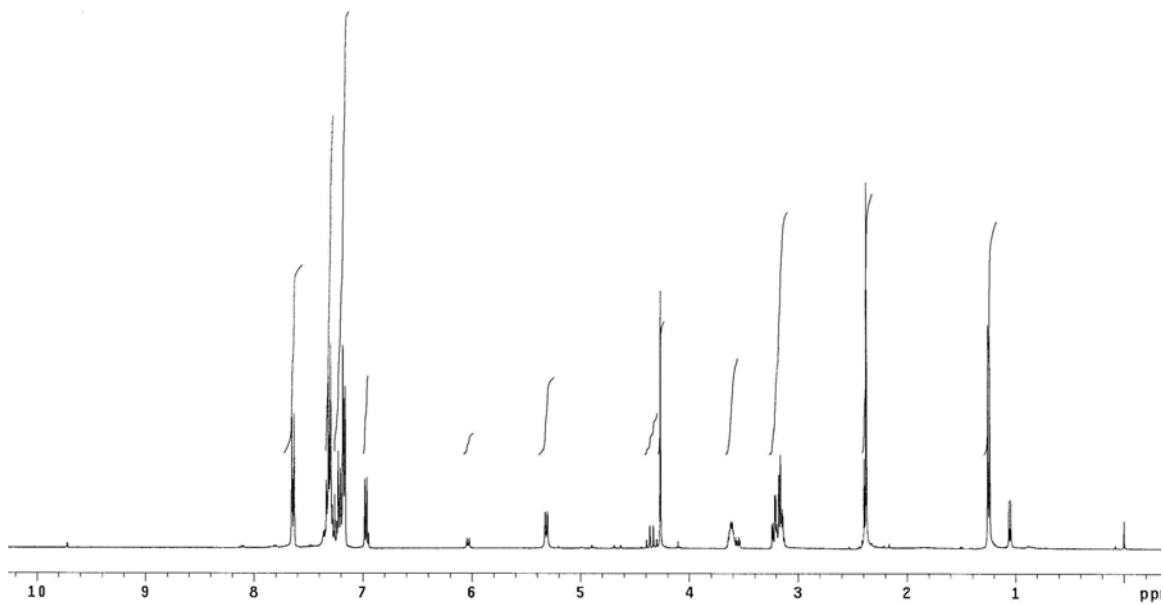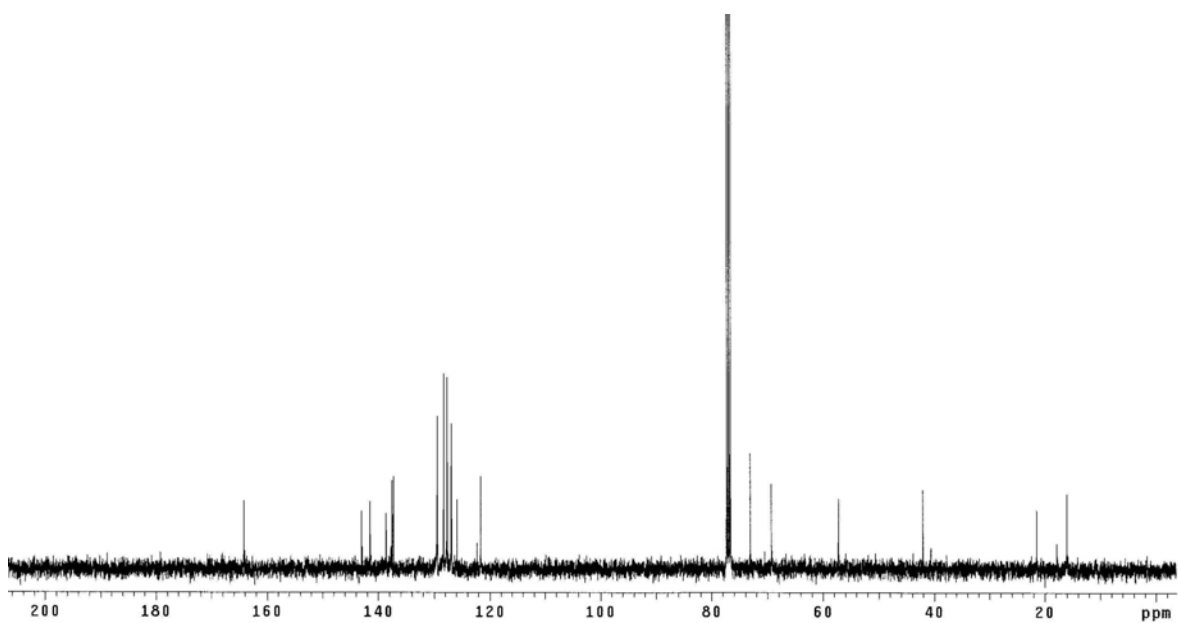



***N*-((1*S*, 2*R*)-2-(6-bromopyridin-2-yl)-1-cyclopropyl)-4-methylbenzenesulfonamide**

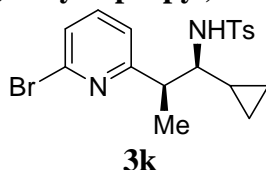

In accordance with the general procedure, 6-bromo-2-vinylpyridine **1a** (144 mg, 0.79 mmol, 300 mol%) was coupled to imine **2k** (60 mg, 0.26 mmol, 100 mol%) to provide the title compound (79 mg, 0.19 mmol) as a colorless liquid in 72% yield after purification by flash silica gel column chromatography (Inseparable mixture of diastereomers in 9:1 ratio,  $R_f = 0.30$ , 15% EtOAc/hexanes, gradient: 10 - 15% EtOAc/hexanes). *Spectral data is reported for the major isomer.*

**<sup>1</sup>H NMR** (400 MHz, CDCl<sub>3</sub>): δ 7.62 (d,  $J = 8.8$  Hz, 2H), 7.33 (t,  $J = 7.6$  Hz, 1H), 7.21 (d,  $J = 8.0$  Hz, 1H), 7.18 (d,  $J = 8.0$  Hz, 2H), 7.01 (d,  $J = 7.6$  Hz, 1H), 5.47 (d,  $J = 7.6$  Hz, 1H), 3.01-2.95 (m, 1H), 2.80 (ddd,  $J = 12.4, 7.6, 4.8$  Hz, 1H), 2.33 (s, 3H), 1.24 (d,  $J = 7.2$  Hz, 3H), 0.75-0.67 (m, 1H), 0.37-0.30 (m, 1H), 0.18-0.05 (m, 2H), -0.05- -0.11 (m, 1H).

**<sup>13</sup>C NMR** (100 MHz, CDCl<sub>3</sub>): δ 164.1, 142.8, 141.0, 138.6, 138.1, 129.4, 126.9, 125.9, 121.3, 62.5, 45.1, 21.4, 15.3, 13.9, 4.5, 3.2.

**HRMS** Calcd. for C<sub>18</sub>H<sub>21</sub>BrN<sub>2</sub>O<sub>2</sub>S (M+1): 408.0507, Found: 408.0509.

**FTIR** (NaCl Film): 3276, 2973, 2322, 2050, 1581, 1553, 1434, 1326, 1157, 1093, 814, 706, 666 cm<sup>-1</sup>.

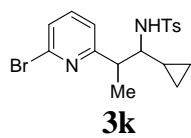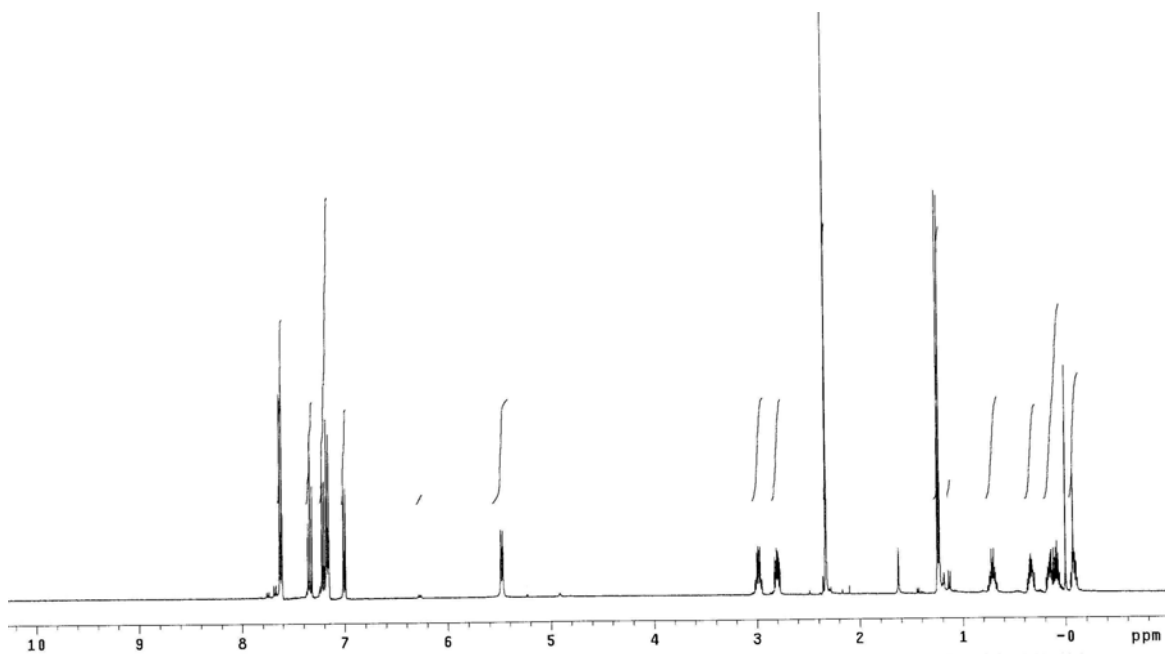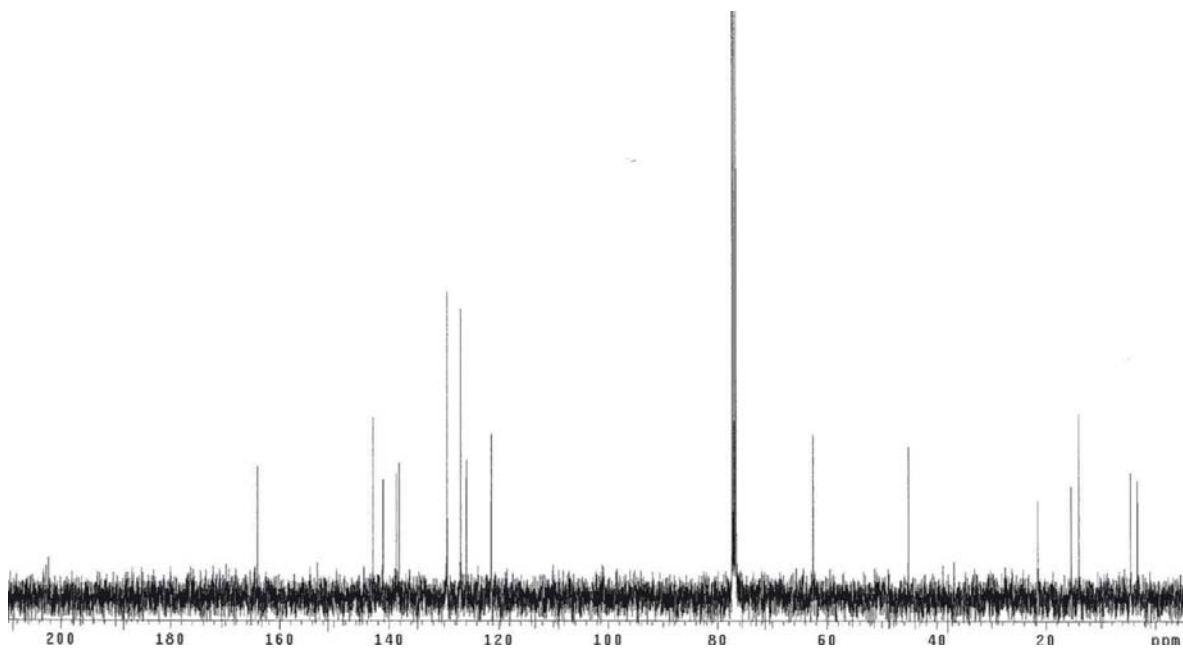

***N*-((2*S*, 1*R*)-3-(6-bromopyridin-2-yl) butan-2-yl)-4-methylbenzenesulfonamide**

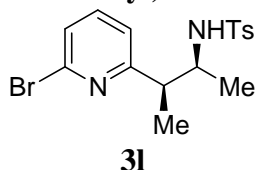

In accordance with the general procedure, 6-bromo-2-vinylpyridine **1a** (144 mg, 0.79 mmol, 300 mol%) was coupled to imine **21** (52 mg, 0.26 mmol, 100 mol%) to provide the title compound (64 mg, 0.17 mmol) as a colorless liquid in 64% yield after purification by flash silica gel column chromatography (Inseparable mixture of diastereomers in 13:1 ratio,  $R_f = 0.25$ , 15% EtOAc/hexanes. *Spectral data is reported for the major isomer.*

**<sup>1</sup>H NMR** (400 MHz, CDCl<sub>3</sub>): δ 7.67 (d,  $J = 8.4$  Hz, 2H), 7.40 (t,  $J = 7.2$  Hz, 1H), 7.26 (d,  $J = 8.0$  Hz, 1H), 7.22 (d,  $J = 8.0$  Hz, 2H), 7.02 (d,  $J = 7.6$  Hz, 1H), 5.44 (d,  $J = 7.6$  Hz, 1H), 3.60-3.52 (m, 1H), 2.87 (quintet,  $J = 6.4$  Hz, 1H), 2.39 (s, 3H), 1.23 (d,  $J = 7.2$  Hz, 3H), 1.04 (d,  $J = 6.4$  Hz, 3H).

**<sup>13</sup>C NMR** (100 MHz, CDCl<sub>3</sub>): δ 164.0, 142.9, 141.2, 138.7, 137.4, 129.4, 126.8, 125.9, 121.0, 53.7, 45.4, 21.4, 19.1, 14.8.

**HRMS** Calcd. for C<sub>16</sub>H<sub>19</sub>BrN<sub>2</sub>O<sub>2</sub>S (M+1): 383.0429, Found: 383.0435.

**FTIR** (NaCl Film): 3275, 2971, 2322, 1581, 1552, 1430, 1380, 1324, 1126, 1089, 958, 911, 813, 705, 667 cm<sup>-1</sup>.

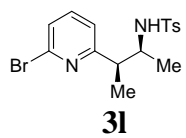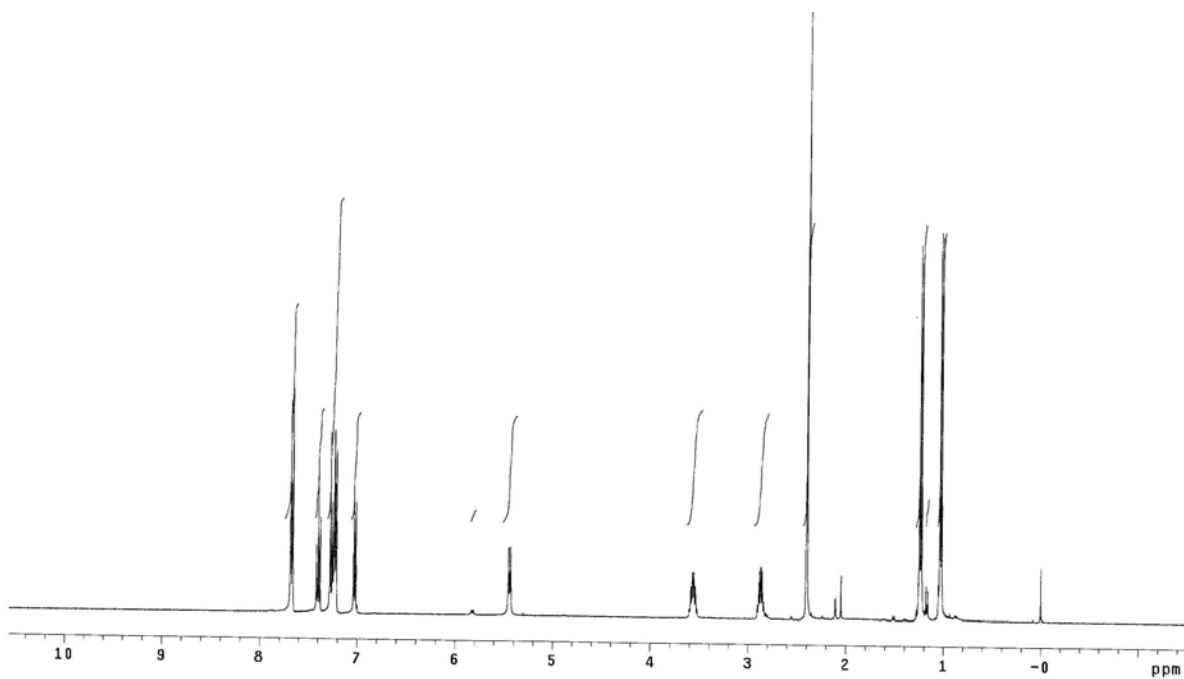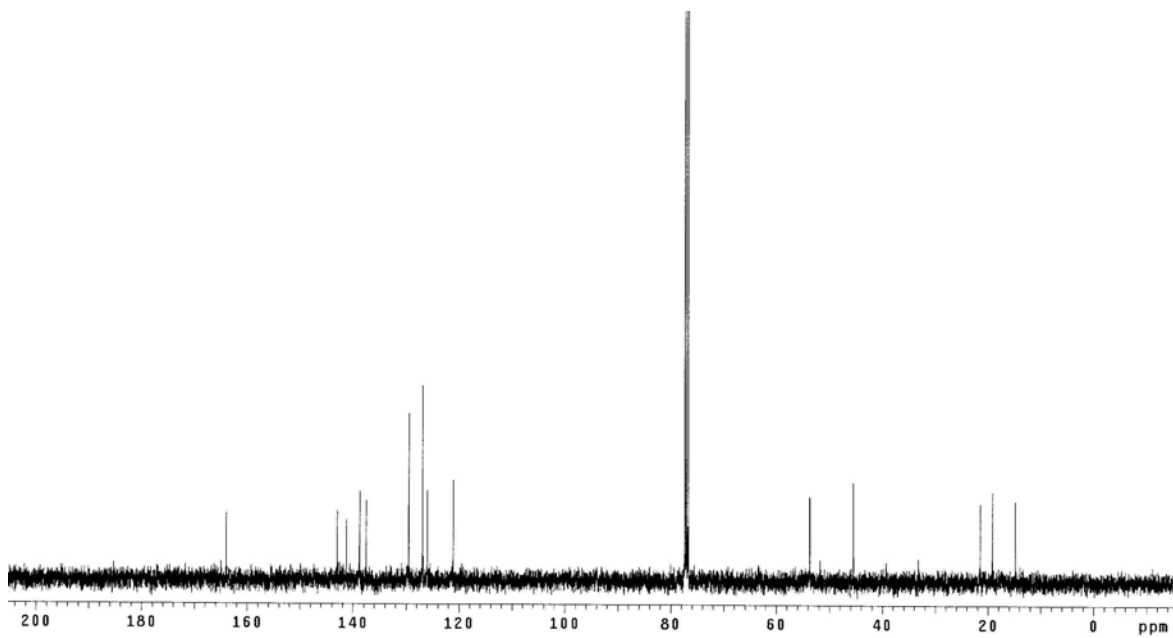

**4-methyl-N-((1R, 2R)-2-(6-methylpyridin-2-yl)-1-(thiophen-2-yl) propyl) benzenesulfonamide**

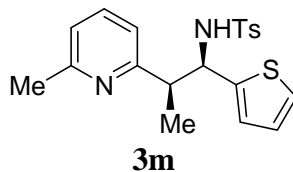

In accordance with the general procedure, commercially available 6-methyl-2-vinylpyridine **1b** (95 mg, 0.79 mmol, 300 mol%) was coupled to imine **2f** (70 mg, 0.26 mmol, 100 mol%) to provide the title compound (71 mg, 0.18 mmol) as an yellow thick syrup in 70% yield after purification by flash silica gel column chromatography (Inseparable mixture of diastereomers in 5:1 ratio,  $R_f = 0.25$ , 20% EtOAc/hexanes, gradient: 10 - 20% EtOAc/hexanes). *Spectral data is reported for the major isomer.*

**$^1\text{H NMR}$**  (400 MHz,  $\text{CDCl}_3$ ):  $\delta$  7.81 (d,  $J = 8.0$  Hz, 1H), 7.47 (d,  $J = 8.0$  Hz, 2H), 7.41 (t,  $J = 8.0$  Hz, 1H), 7.29 (d,  $J = 7.6$  Hz, 1H), 7.05 (d,  $J = 8.0$  Hz, 2H), 6.99 (d,  $J = 7.6$  Hz, 1H), 6.95 (dd,  $J = 4.8, 0.8$  Hz, 1H), 6.74 (d,  $J = 8.0$  Hz, 1H), 6.69 (dd,  $J = 4.8, 3.6$  Hz, 1H), 6.61 (d,  $J = 4.0$  Hz, 1H), 4.88 (dd,  $J = 5.2, 4.4$  Hz, 1H), 3.31-3.25 (m, 1H), 2.56 (s, 3H), 2.32 (s, 3H), 1.24 (d,  $J = 7.2$  Hz, 3H).

**$^{13}\text{C NMR}$**  (100 MHz,  $\text{CDCl}_3$ ):  $\delta$  160.8, 157.0, 142.4, 137.7, 137.0, 129.6, 129.0, 126.7, 126.1, 125.7, 124.6, 121.5, 119.3, 58.4, 44.7, 24.3, 21.3, 15.6.

**HRMS** Calcd. for  $\text{C}_{20}\text{H}_{23}\text{N}_2\text{O}_2\text{S}_2$  ( $M+1$ ): 387.1201, Found: 387.1201.

**FTIR** (NaCl Film): 3268, 2924, 1594, 1460, 1376, 1327, 1156, 1092, 812, 749, 666  $\text{cm}^{-1}$ .

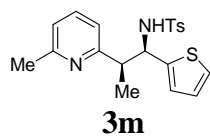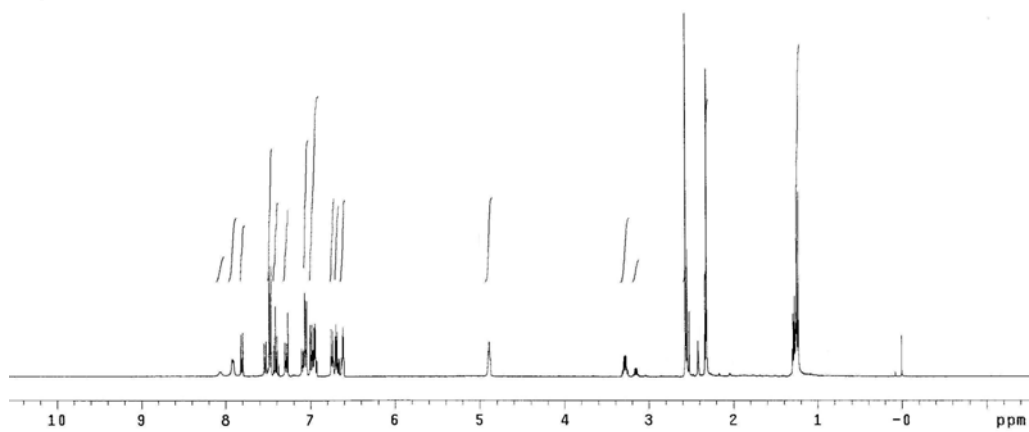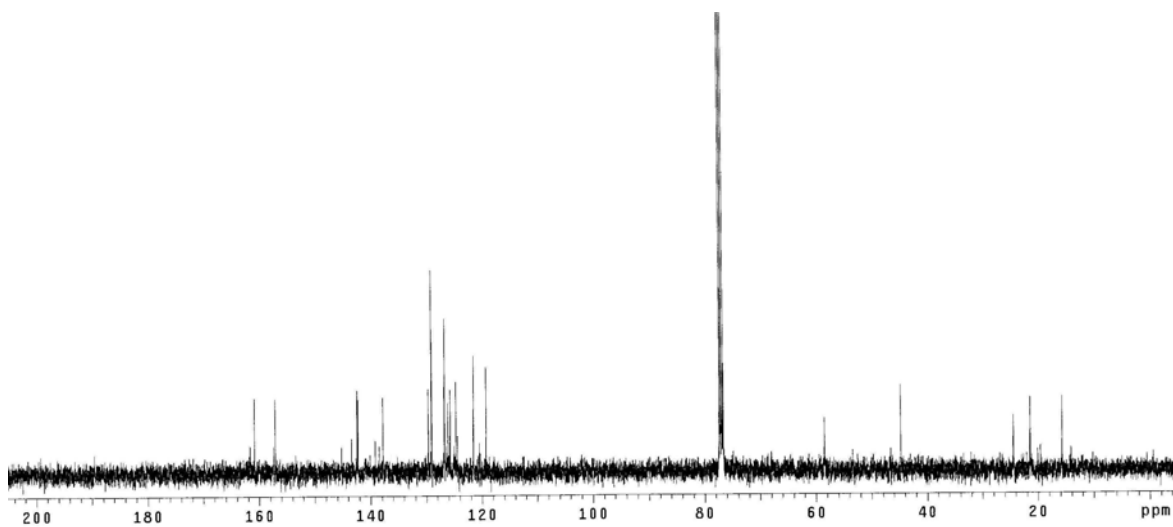

***N*-((1*S*, 2*R*)-1-cyclopropyl-2-(6-methylpyridin-2-yl) propyl)-4-methylbenzenesulfonamide**

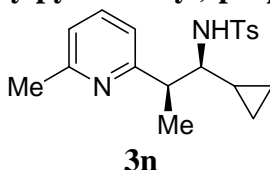

In accordance with the general procedure, commercially available 6-methyl-2-vinylpyridine **1b** (95 mg, 0.79 mmol, 300 mol%) was coupled to imine **2k** (60 mg, 0.26 mmol, 100 mol%) to provide the title compound (51 mg, 0.15 mmol) as a colorless liquid in 56% yield after purification by flash silica gel column chromatography (Inseparable mixture of diastereomers in 10:1 ratio,  $R_f = 0.23$ , 25% EtOAc/hexanes, gradient: 10 - 25% EtOAc/hexanes). *Spectral data is reported for the major isomer.*

**<sup>1</sup>H NMR** (400 MHz, CDCl<sub>3</sub>):  $\delta$  7.72 (d,  $J = 8.0$  Hz, 2H), 7.47 (t,  $J = 7.6$  Hz, 1H), 7.22 (d,  $J = 8.0$  Hz, 2H), 7.19-7.14 (m, 1H), 6.99 (d,  $J = 8.0$  Hz, 1H), 6.90 (d,  $J = 7.6$  Hz, 1H), 2.95-2.87 (m, 1H), 2.85-2.79 (m, 1H), 2.42 (s, 3H), 2.38 (s, 3H), 1.29 (d,  $J = 7.2$  Hz, 3H), 0.68-0.63 (m, 1H), 0.40-0.36 (m, 1H), 0.20-0.17 (m, 2H), 0.15-0.07 (m, 1H).

**<sup>13</sup>C NMR** (100 MHz, CDCl<sub>3</sub>):  $\delta$  161.9, 157.2, 143.4, 139.1, 138.5, 126.9, 126.3, 121.2, 118.9, 62.3, 43.8, 24.4, 21.4, 15.6, 13.1, 3.8, 3.3.

**HRMS** Calcd. for C<sub>19</sub>H<sub>25</sub>N<sub>2</sub>O<sub>2</sub>S<sub>2</sub> (M+1): 345.1637, Found: 345.1639.

**FTIR** (NaCl Film): 3272, 2924, 1595, 1458, 1327, 1158, 1094, 1041, 814, 669 cm<sup>-1</sup>.

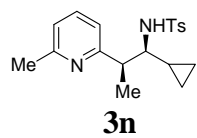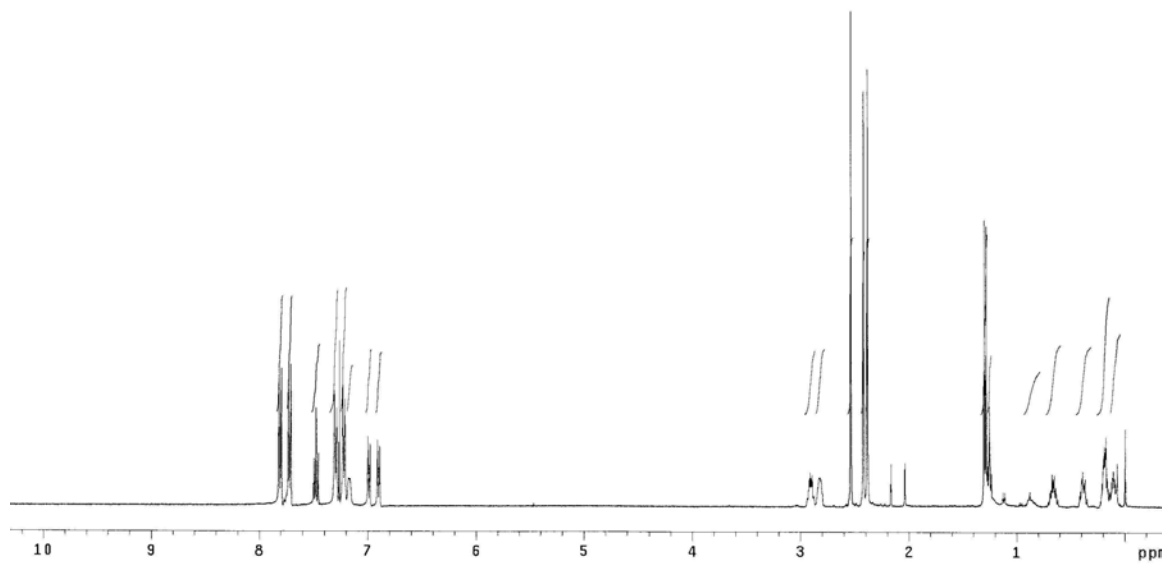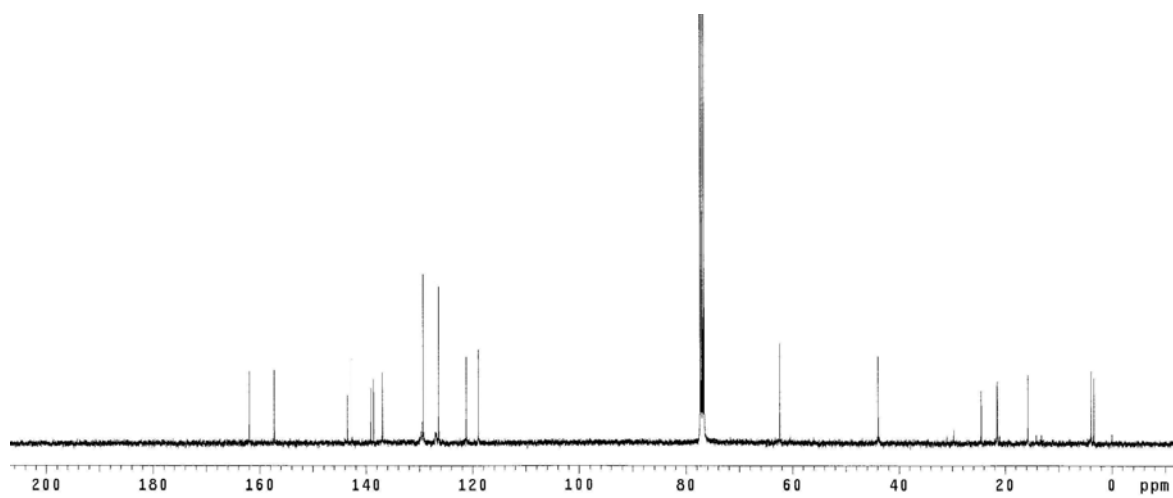



**4-methyl-N-((1R, 2R)-2-(6-phenylpyridin-2-yl)-1-(thiophen-2-yl)propyl)benzenesulfonamide**

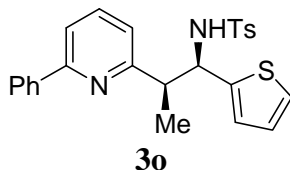

In accordance with the general procedure, 6-phenyl-2-vinylpyridine **1c** (141 mg, 0.79 mmol, 300 mol%) was coupled to imine **2f** (70 mg, 0.26 mmol, 100 mol%) to provide the title compound (90 mg, 0.20 mmol) as a white solid in 77% yield after purification by flash silica gel column chromatography (Inseparable mixture of diastereomers in 5:1 ratio,  $R_f = 0.30$ , 20% EtOAc/hexanes, gradient: 10 - 20% EtOAc/hexanes). *Spectral data is reported for the major isomer.*

**<sup>1</sup>H NMR** (400 MHz, CDCl<sub>3</sub>):  $\delta$  8.01 (dd,  $J = 8.8, 1.6$  Hz, 1H), 7.75-7.73 (m, 1H), 7.47 (d,  $J = 8.4$  Hz, 2H), 7.58-7.51 (m, 4H), 7.46 (d,  $J = 6.8$  Hz, 1H), 7.38 (d,  $J = 8.4$  Hz, 2H), 6.96-6.93 (m, 2H), 6.87 (t,  $J = 4.0$  Hz, 1H), 6.69 (t,  $J = 3.6$  Hz, 1H) 5.64 (d,  $J = 3.6$  Hz, 1H), 4.99 (dd,  $J = 6.0, 5.2$  Hz, 1H), 3.46-3.37 (m, 1H), 2.25 (s, 3H), 1.32 (d,  $J = 7.2$  Hz, 3H).

**<sup>13</sup>C NMR** (100 MHz, CDCl<sub>3</sub>):  $\delta$  161.2, 155.9, 142.4, 142.3, 138.6, 137.6, 137.5, 129.2, 128.9, 128.8, 126.7, 126.6, 126.0, 125.8, 124.6, 120.8, 118.7, 58.4, 45.3, 21.3, 15.6.

**HRMS** Calcd. for C<sub>25</sub>H<sub>24</sub>N<sub>2</sub>O<sub>2</sub>S<sub>2</sub> (M+1): 449.1357, Found: 449.1360.

**FTIR** (NaCl Film): 3270, 3064, 1591, 1569, 1447, 1327, 1155, 1091, 908, 853, 761, 694, 666 cm<sup>-1</sup>.

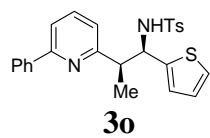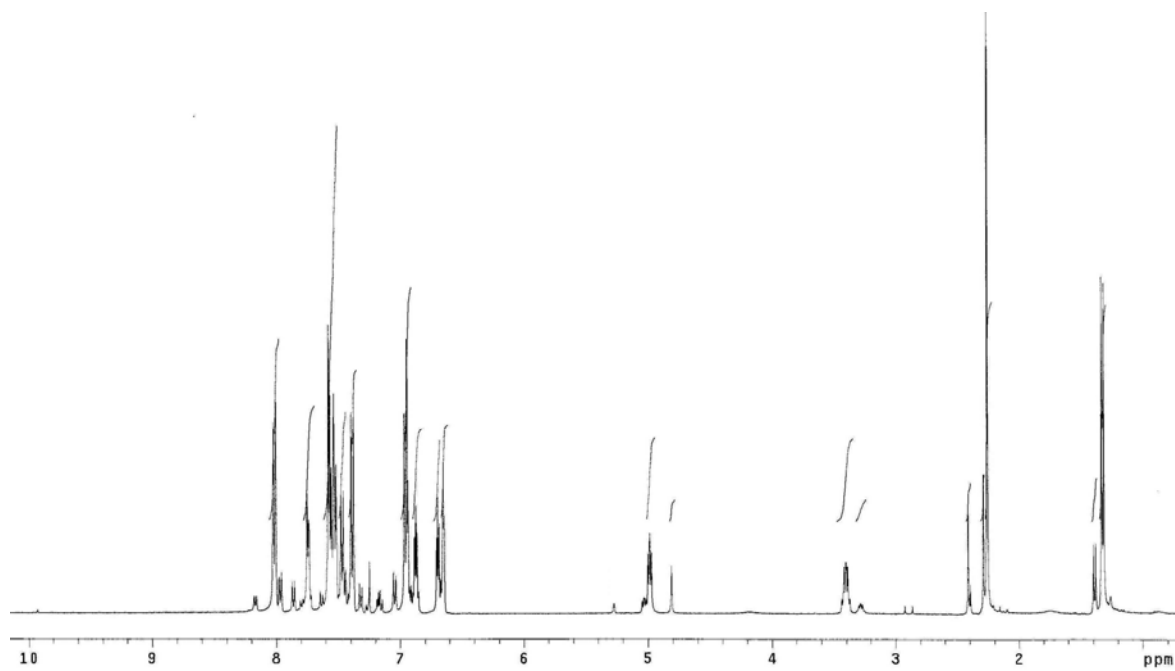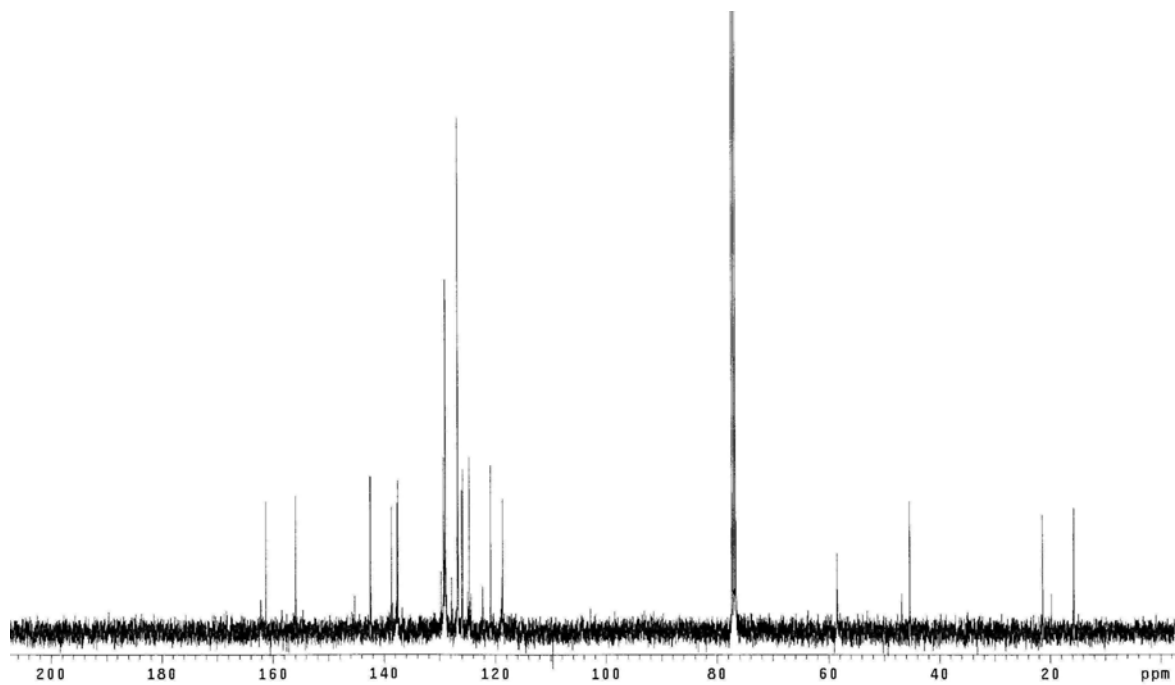

**4-methyl-N-((2R, 3S)-5-methyl-2-(6-phenylpyridin-2-yl) hexan-3-yl) benzenesulfonamide**

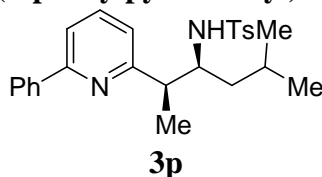

In accordance with the general procedure, 6-phenyl-2-vinylpyridine **1c** (144 mg, 0.79 mmol, 300 mol%) was coupled to imine **2i** (63 mg, 0.26 mmol, 100 mol%) to provide the title compound (88 mg, 0.20 mmol) as a colorless liquid in 80% yield after purification by flash silica gel column chromatography (Inseparable mixture of diastereomers in 4:1 ratio,  $R_f = 0.30$ , 20% EtOAc/hexanes, gradient: 10 - 20% EtOAc/hexanes). *Spectral data is reported for the major isomer.*

**<sup>1</sup>H NMR** (400 MHz, CDCl<sub>3</sub>):  $\delta$  8.00-7.98 (m, 2H), 7.79 (d,  $J = 8.0$  Hz, 1H), 7.66 (d,  $J = 8.4$  Hz, 2H), 7.62-7.56 (m, 2H), 7.51 (dd,  $J = 8.0, 1.6$  Hz, 2H), 7.44 (dd,  $J = 7.6, 2.0$  Hz, 1H), 7.14 (d,  $J = 8.0$  Hz, 2H), 6.93 (d,  $J = 8.4$  Hz, 1H), 6.62 (d,  $J = 7.6$  Hz, 1H), 3.53-3.47 (m, 1H), 2.97 (ddd,  $J = 14.8, 7.2, 3.6$  Hz, 1H), 2.32 (s, 3H), 1.73-1.66 (m, 1H), 1.23 (d,  $J = 7.2$  Hz, 3H), 1.18-1.05 (m, 1H), 0.84 (d,  $J = 6.4$  Hz, 3H), 0.84 (d,  $J = 6.8$  Hz, 3H).

**<sup>13</sup>C NMR** (100 MHz, CDCl<sub>3</sub>):  $\delta$  162.0, 155.9, 142.6, 139.4, 138.0, 137.4, 129.3, 129.2, 129.1, 126.8, 126.7, 120.2, 118.1, 56.5, 44.5, 40.4, 23.9, 23.0, 22.2, 21.8, 14.9.

**HRMS** Calcd. for C<sub>25</sub>H<sub>31</sub>N<sub>2</sub>O<sub>2</sub>S (M+1): 423.2106, Found: 423.2111.

**FTIR** (NaCl Film): 3278, 2955, 2866, 1590, 1569, 1495, 1447, 1385, 1367, 1325, 1155, 1092, 960, 763, 731, 693, 662 cm<sup>-1</sup>.

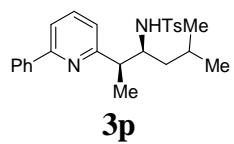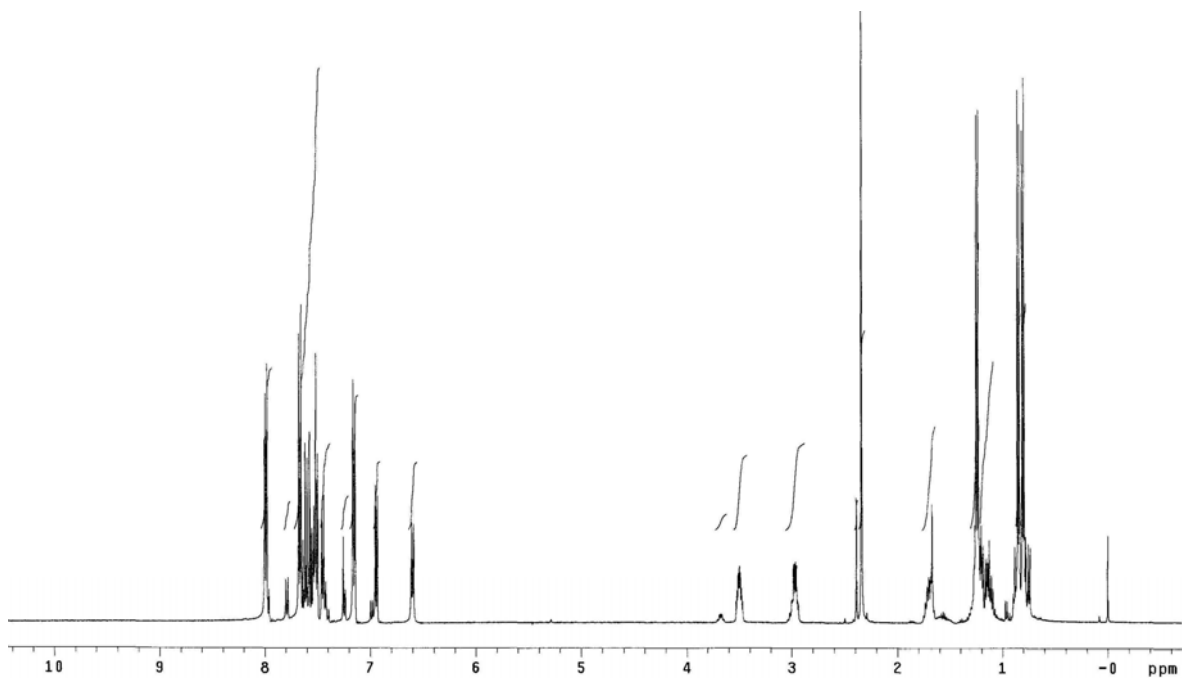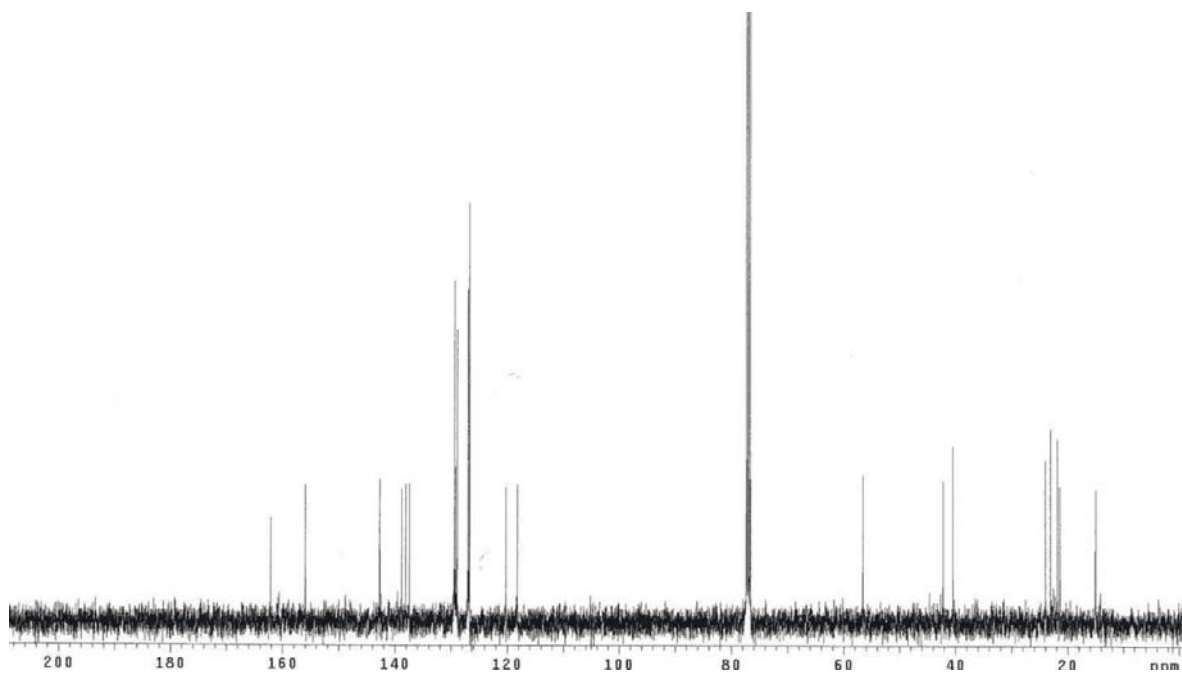

***N*-((1*R*, 2*R*)-2-(6-((*tert*-butyldimethylsilyloxy) methyl) pyridine-2-yl)-1-(thiophen-2-yl) propyl)-4-methanebenzenesulfonamide**

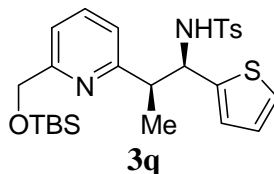

In accordance with the general procedure, 6-silyloxymethyl-2-vinylpyridine **1d** (197 mg, 0.79 mmol, 300 mol%) was coupled to imine **2f** (70 mg, 0.26 mmol, 100 mol%) to provide the title compound (96 mg, 0.18 mmol) as a colorless liquid in 71% yield after purification by flash silica gel column chromatography (separable mixture of diastereomers in 5:1 ratio,  $R_f$ , major = 0.30,  $R_f$ , minor = 0.25, 15% EtOAc/hexanes, gradient: 10 - 15% EtOAc/hexanes).

**<sup>1</sup>H NMR** (400 MHz, CDCl<sub>3</sub>, Major Isomer):  $\delta$  7.71 (d,  $J$  = 7.2 Hz, 1H), 7.53 (d,  $J$  = 8.0 Hz, 2H), 7.34 (d,  $J$  = 7.6 Hz, 1H), 7.09 (d,  $J$  = 8.0 Hz, 2H), 7.14 (d,  $J$  = 8.0 Hz, 2H), 6.93 (dd,  $J$  = 5.2, 1.6 Hz, 1H), 6.77 (d,  $J$  = 7.6 Hz, 1H), 6.67-6.64 (m, 1H), 6.60 (d,  $J$  = 3.2 Hz, 1H), 4.91 (dd,  $J$  = 7.2, 5.2 Hz, 1H), 4.82 (q,  $J$  = 14.8 Hz, 2H), 3.21-3.14 (m, 1H), 2.38 (s, 3H), 1.29 (d,  $J$  = 6.8 Hz, 3H) 0.98 (s, 9H), 0.16 (s, 6H).

**<sup>13</sup>C NMR** (100 MHz, CDCl<sub>3</sub>):  $\delta$  161.2, 160.5, 145.1, 142.3, 138.4, 137.5, 129.0, 121.7, 125.9, 125.0, 124.3, 121.8, 118.3, 65.9, 59.5, 46.7, 25.9, 21.4, 19.5, 18.3, -5.2.

**HRMS** Calcd. for C<sub>26</sub>H<sub>37</sub>N<sub>2</sub>O<sub>3</sub>Si S<sub>2</sub> (M+1): 517.2015, Found: 517.2015.

**FTIR** (NaCl Film): 3273, 2953, 2928, 2855, 1594, 1462, 1449, 1361, 1158, 1117, 1093, 837, 778, 696, 668 cm<sup>-1</sup>.

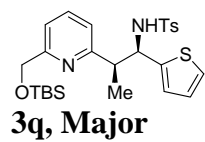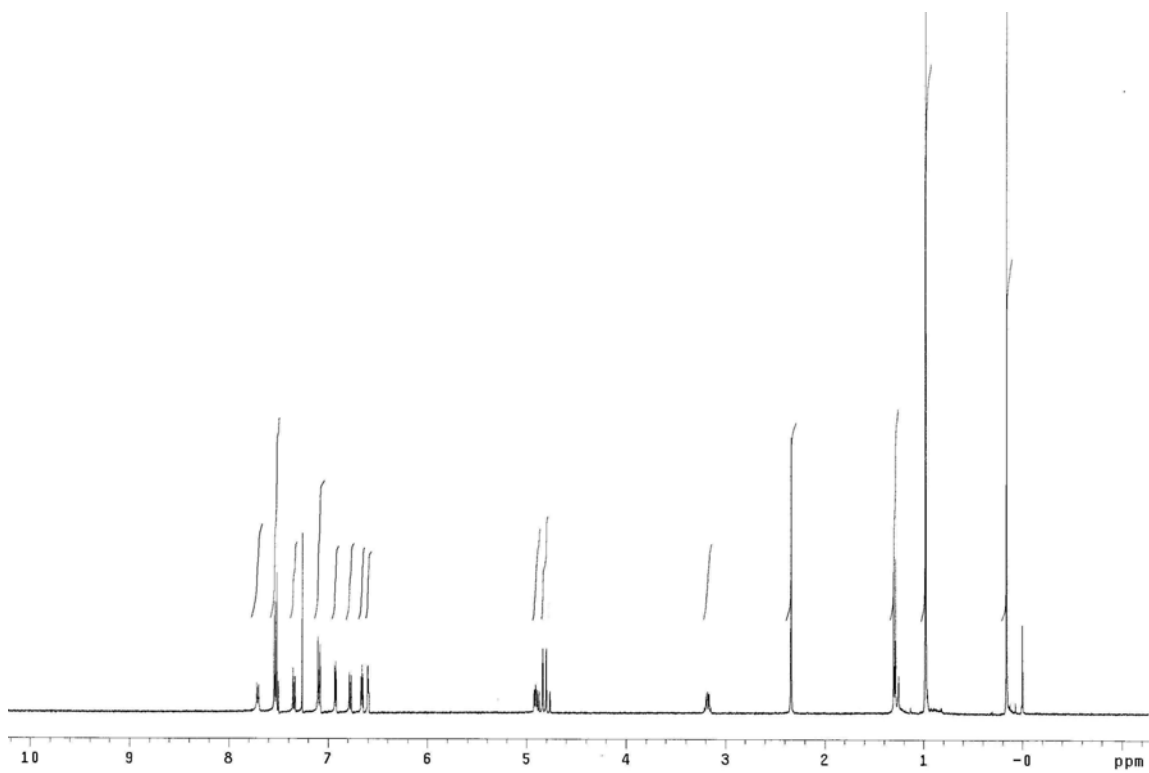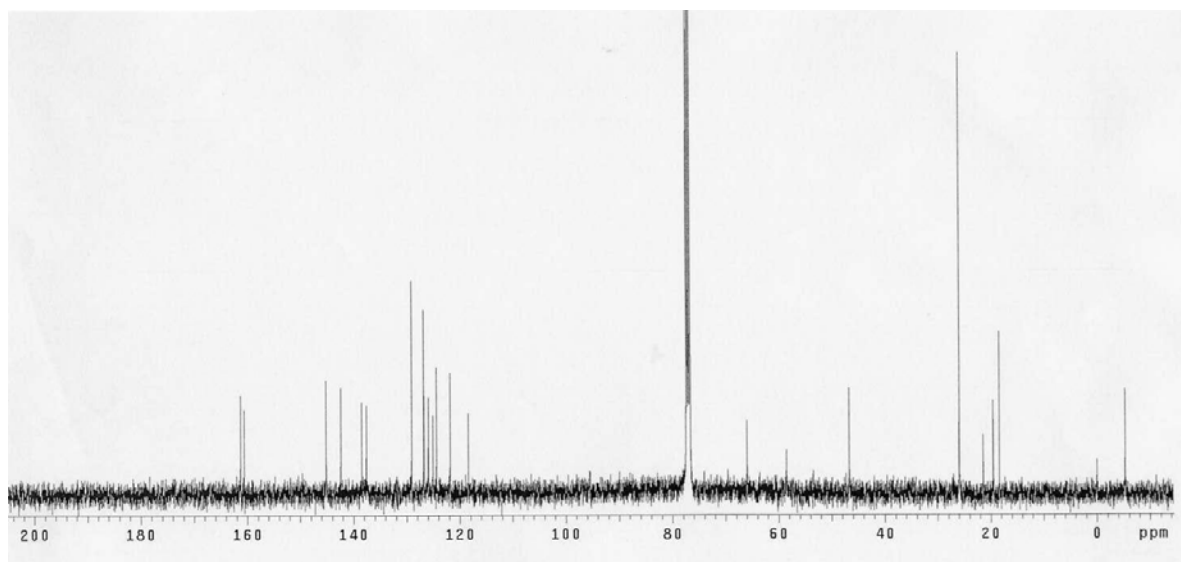

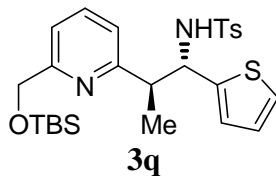

**<sup>1</sup>H NMR** (400 MHz, CDCl<sub>3</sub>, Minor Isomer): 7.53 (d, *J* = 7.6 Hz, 1H), 7.45 (d, *J* = 8.0 Hz, 2H), 7.35 (d, *J* = 8.0 Hz, 1H), 7.04 (d, *J* = 8.0 Hz, 2H), 7.14 (d, *J* = 8.0 Hz, 2H), 6.95 (dd, *J* = 4.8, 2.0 Hz, 1H), 6.80 (d, *J* = 8.0 Hz, 1H), 6.69-6.74 (m, 1H), 6.58 (d, *J* = 2.8 Hz, 1H), 4.88 (dd, *J* = 6.8, 4.4 Hz, 1H), 4.83-4.82 (m, 2H), 3.34-3.27 (m, 1H), 2.32 (s, 3H), 1.28 (d, *J* = 6.8 Hz, 3H) 0.99 (s, 9H), 0.18 (s, 6H).

**<sup>13</sup>C NMR** (100 MHz, CDCl<sub>3</sub>): 165.3, 160.3, 142.4, 142.2, 137.7, 137.4, 129.1, 126.7, 126.1, 125.7, 124.7, 120.5, 118.3, 65.9, 58.4, 45.0, 29.6, 25.9, 21.4, 15.8, -0.01, -5.3.

**HRMS** Calcd. for C<sub>26</sub>H<sub>37</sub>N<sub>2</sub>O<sub>3</sub>Si<sub>2</sub> S<sub>2</sub> (M+1):517.2015, Found:517.2017.

**FTIR** (NaCl Film): 3270, 2957, 2929, 2850, 1589, 1460, 1441, 1360, 1156, 1116, 1093, 837, 771, 692, 666 cm<sup>-1</sup>.

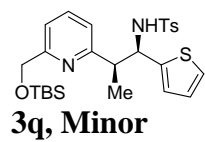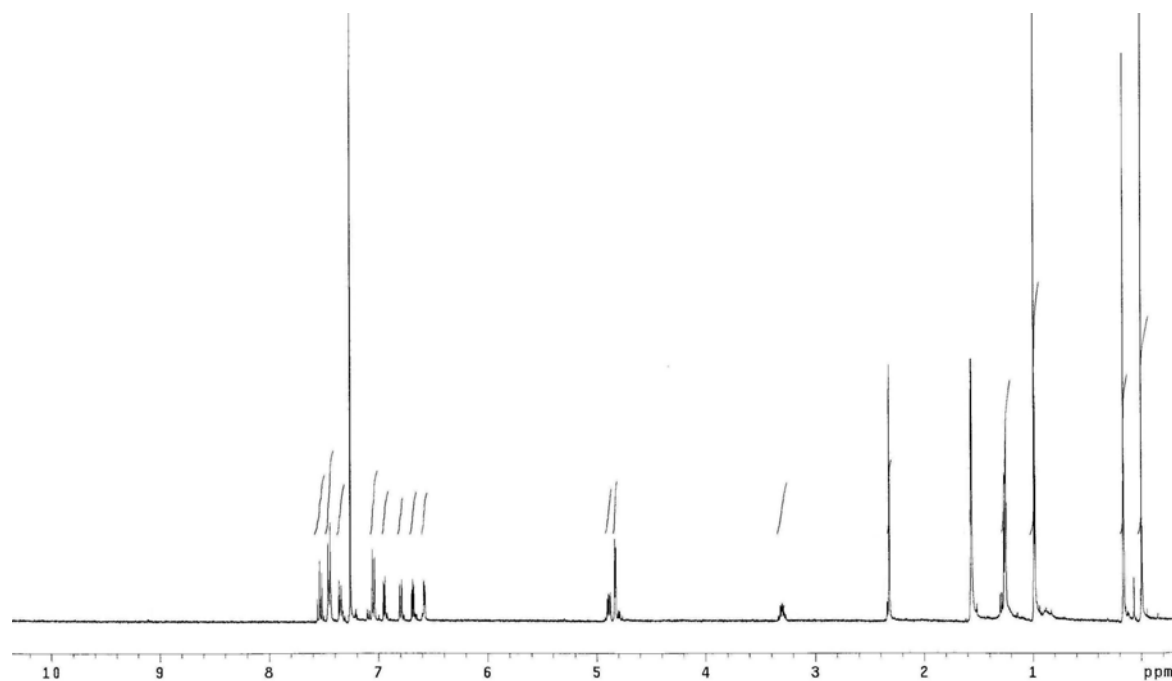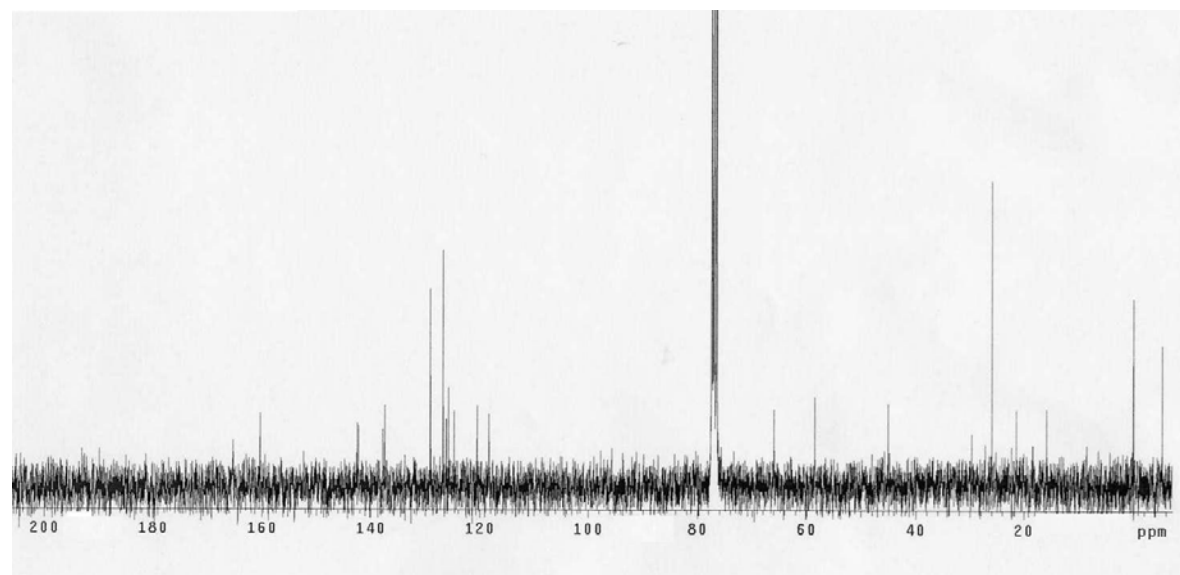



***N*-((1*S*, 2*R*)-2-(6-((*tert*-butyldimethylsilyloxy) methyl) pyridin-2-yl)-1-cyclopropylpropyl)-4-methylbenzenesulfonamide**

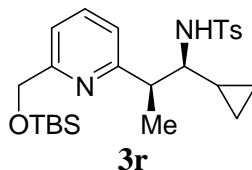

In accordance with the general procedure, 6-silyloxymethyl-2-vinylpyridine **1d** (197 mg, 0.79 mmol, 300 mol%) was coupled to imine **2k** (60 mg, 0.26 mmol, 100 mol%) to provide the title compound (85 mg, 0.18 mmol) as colorless liquid in 67% yield after purification by flash silica gel column chromatography (Inseparable mixture of diastereomers in 6:1 ratio,  $R_f = 0.25$ , 15% EtOAc/hexanes, gradient: 10 - 15% EtOAc/hexanes). *Spectral data is reported for the major isomer.*

**<sup>1</sup>H NMR** (400 MHz, CDCl<sub>3</sub>):  $\delta$  7.80 (d,  $J = 8.4$  Hz, 1H), 7.68 (d,  $J = 8.0$  Hz, 2H), 7.59 (t,  $J = 7.6$  Hz, 1H), 7.43-7.30 (m, 1H), 7.20 (d,  $J = 8.0$  Hz, 2H), 6.94 (d,  $J = 8.0$  Hz, 1H), 4.79 (s, 2H), 2.97-2.90 (m, 1H), 2.81 (ddd,  $J = 8.0, 6.4, 3.6$  Hz, 1H), 2.33 (s, 3H), 1.29 (d,  $J = 7.2$  Hz, 3H), 1.11-1.09 (m, 1H), 0.96 (s, 9H), 0.70-0.61 (m, 1H), 0.40-0.35 (m, 1H), 0.18-0.08 (m, 2H), 0.13 (s, 6H).

**<sup>13</sup>C NMR** (100 MHz, CDCl<sub>3</sub>):  $\delta$  161.5, 160.3, 142.6, 138.5, 137.3, 129.6, 127.8, 120.2, 118.0, 66.0, 62.4, 44.1, 25.9, 21.4, 18.3, 15.7, 13.1, 10.6, 3.9, 3.2, -5.3.

**HRMS** Calcd. for C<sub>25</sub>H<sub>39</sub>N<sub>2</sub>O<sub>3</sub>SiS (M+1): 475.2451, Found: 475.2453.

**FTIR** (NaCl Film): 3285, 2953, 2928, 2855, 1595, 1461, 1326, 1158, 1117, 1093, 1042, 837, 813, 706, 669 cm<sup>-1</sup>.

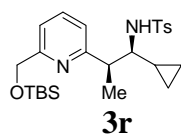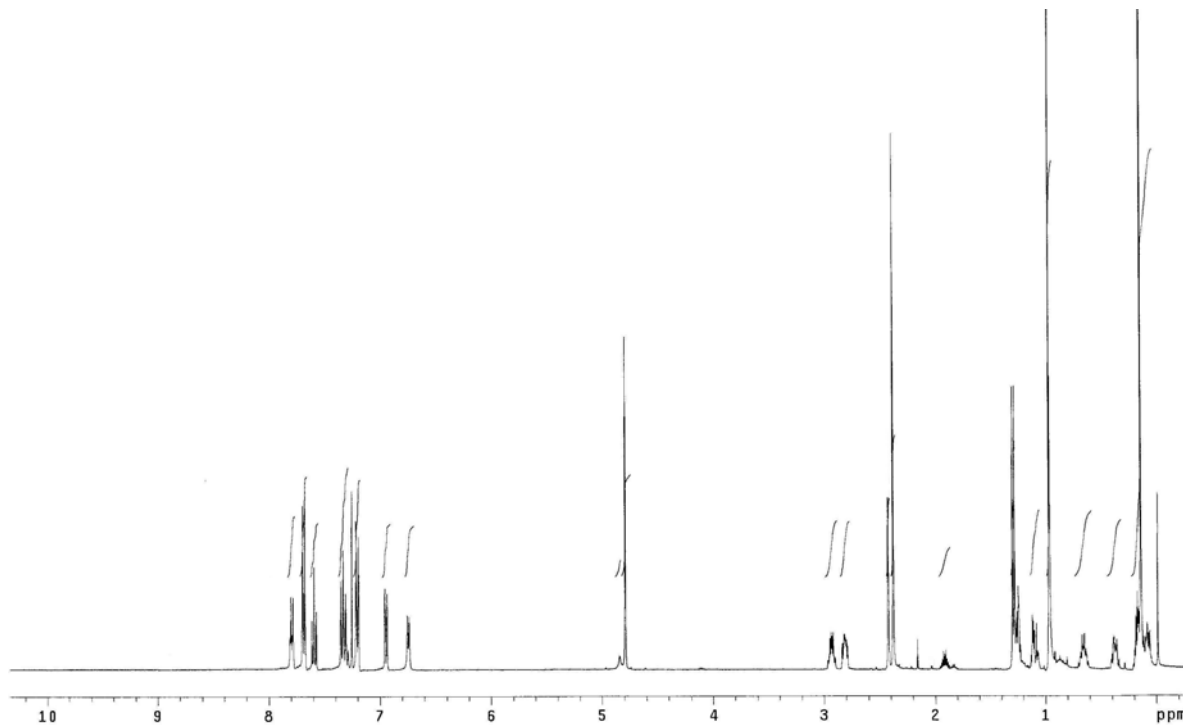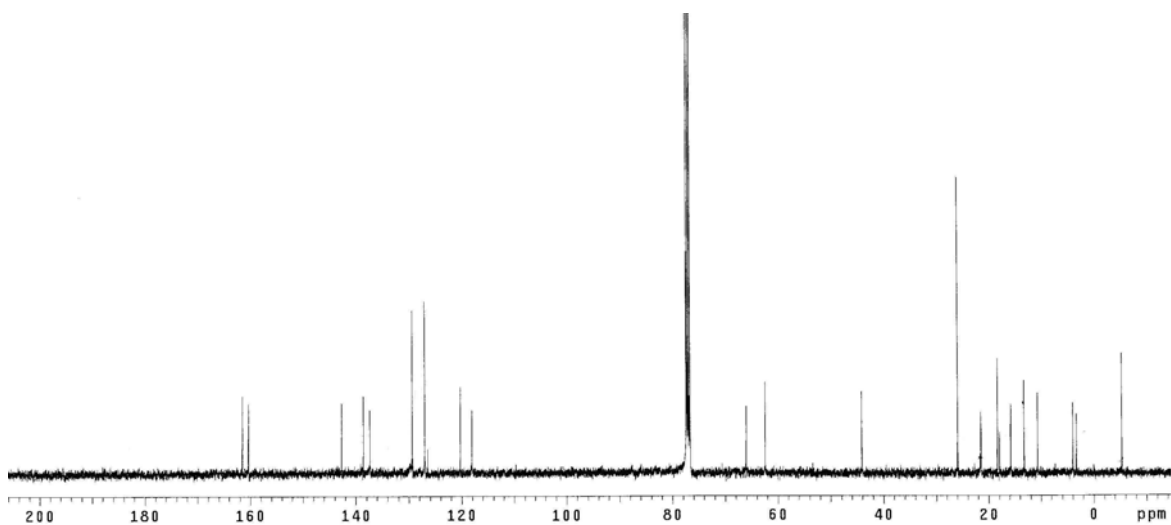

***N*-((1*R*, 2*R*)-2-(8-(benzyloxy) quinolin-2-yl)-1-(furan-2-yl)propyl)-4-methylbenzenesulfonamide**

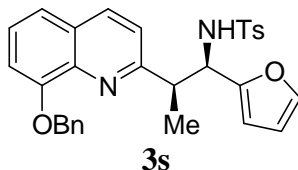

In accordance with the general procedure, 6-benzyloxy-2-vinylquinoline **1e** (207 mg, 0.79 mmol, 300 mol%) was coupled to imine **2e** (66 mg, 0.26 mmol, 100 mol%) to provide the title compound (125 mg, 0.24 mmol) as a yellow liquid in 94% yield after purification by flash silica gel column chromatography (separable mixture of diastereomers in 3:1 ratio,  $R_f$  major = 0.25,  $R_f$  major = 0.30, 25% EtOAc/hexanes, gradient: 10 - 25 % EtOAc/hexanes).

**<sup>1</sup>H NMR** (400 MHz, CDCl<sub>3</sub>, Major Isomer):  $\delta$  7.94 (d,  $J$  = 8.8 Hz, 1H), 7.67 (d,  $J$  = 6.8 Hz, 1H), 7.61 (d,  $J$  = 8.0 Hz, 2H), 7.45-7.30 (m, 7H), 7.12-7.09 (m, 3H), 7.06 (d,  $J$  = 1.6 Hz, 1H), 6.85 (d,  $J$  = 7.6 Hz, 1H), 6.04-6.03 (m, 1H), 5.94 (dd,  $J$  = 3.2 Hz, 1H), 5.43 (m, 2H), 4.78 (dd,  $J$  = 8.4, 4.8 Hz, 1H), 3.56-3.49 (m, 1H), 2.22 (s, 3H), 1.35 (d,  $J$  = 7.2 Hz, 3H).

**<sup>13</sup>C NMR** (100 MHz, CDCl<sub>3</sub>):  $\delta$  160.6, 154.0, 152.5, 142.1, 141.1, 139.1, 137.4, 136.8, 136.4, 128.9, 128.6, 128.0, 127.8, 127.5, 126.7, 126.3, 120.3, 119.4, 110.3, 110.0, 108.3, 70.8, 56.1, 44.0, 21.3, 15.6.

**HRMS** Calcd. for C<sub>30</sub>H<sub>29</sub>N<sub>2</sub>O<sub>4</sub>S (M+1): 513.1848, Found: 513.1851.

**FTIR** (NaCl Film): 3271, 3061, 2927, 1599, 1503, 1452, 1324, 1159, 1094, 883, 733, 696 cm<sup>-1</sup>.

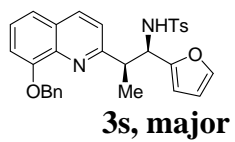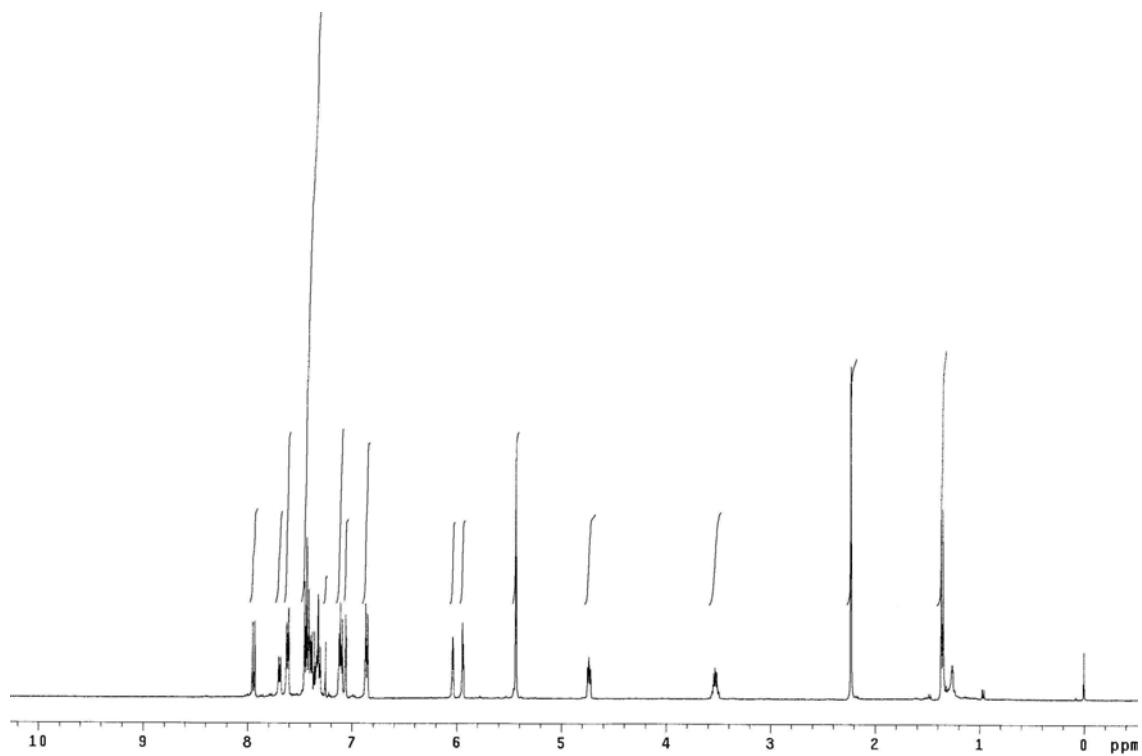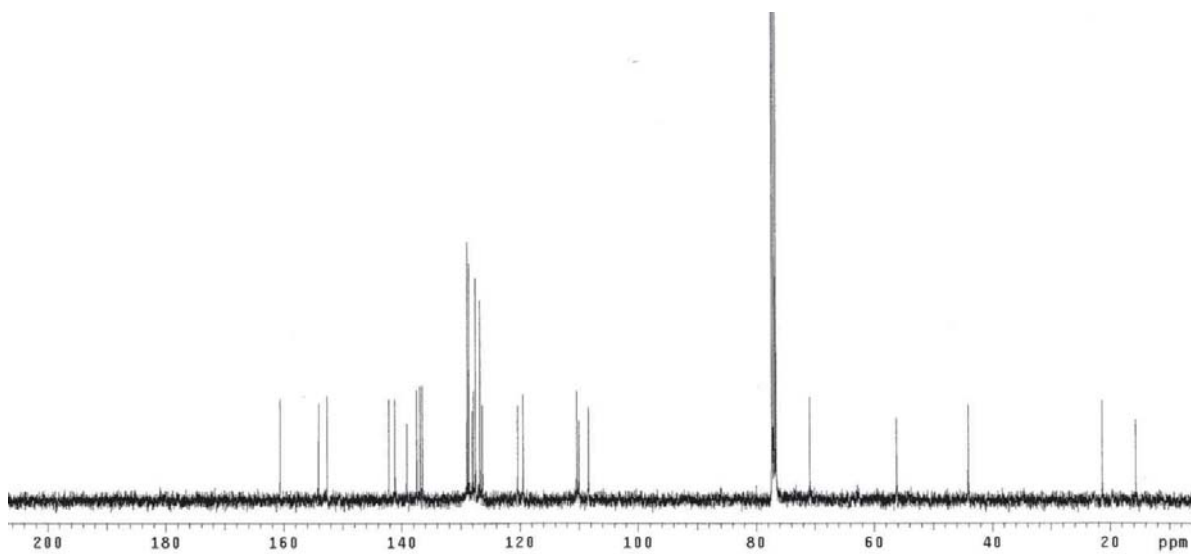

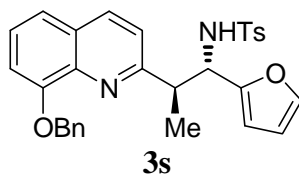

**<sup>1</sup>H NMR** (400 MHz, CDCl<sub>3</sub>, Minor Isomer): δ 8.39 (d, *J* = 8.0 Hz, 1H), 7.93 (d, *J* = 8.4 Hz, 1H), 7.60 (d, *J* = 8.4 Hz, 2H), 7.47-7.28 (m, 7H), 7.10-7.05 (m, 3H), 6.98 (d, *J* = 8.0 Hz, 2H), 5.94 (dd, *J* = 3.2, 1.6 Hz, 1H), 5.77 (d, *J* = 3.2 Hz, 1H), 5.42 (m, 2H), 4.79 (dd, *J* = 8.4, 4.8 Hz, 1H), 3.61-3.55 (m, 1H), 2.29 (s, 3H), 1.33 (d, *J* = 7.2 Hz, 3H).

**<sup>13</sup>C NMR** (100 MHz, CDCl<sub>3</sub>): δ 161.8, 154.3, 153.9, 142.0, 140.9, 139.0, 138.7, 136.8, 136.6, 128.9, 128.6, 128.0, 127.9, 127.5, 126.6, 126.2, 121.5, 119.5, 110.1, 109.9, 107.1, 70.7, 56.4, 44.0, 21.3, 19.2.

**HRMS** Calcd. for C<sub>30</sub>H<sub>29</sub>N<sub>2</sub>O<sub>4</sub>S (M+1): 513.1848, Found: 513.1854.

**FTIR** (NaCl Film): 3269, 3063, 2925, 1593, 1500, 1458, 1329, 1200, 1094, 881, 733, 696 cm<sup>-1</sup>.

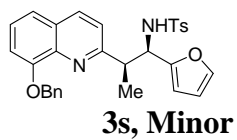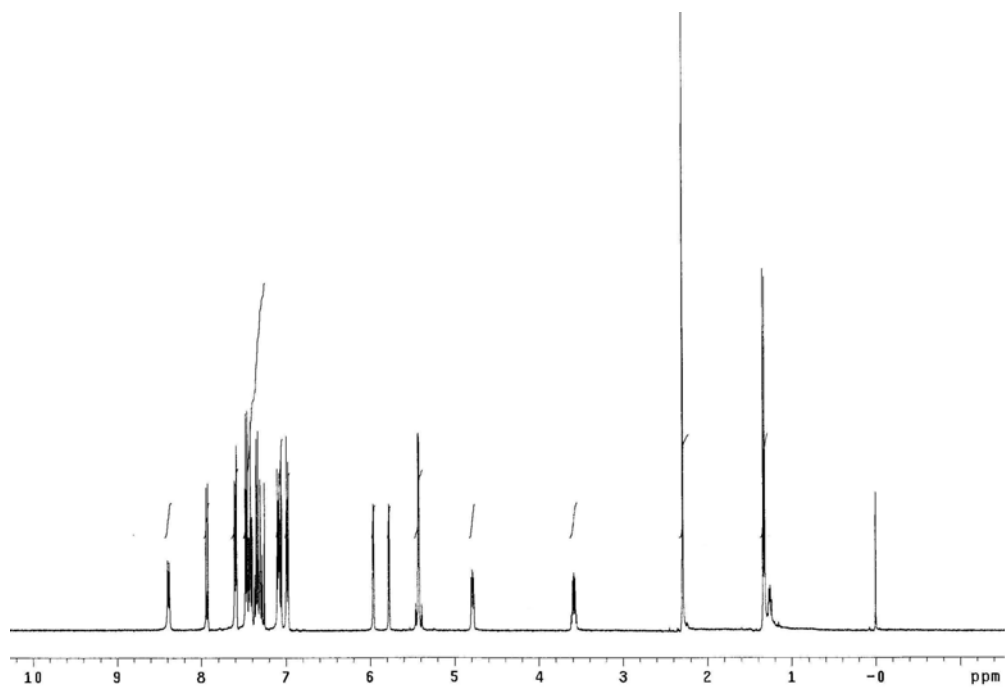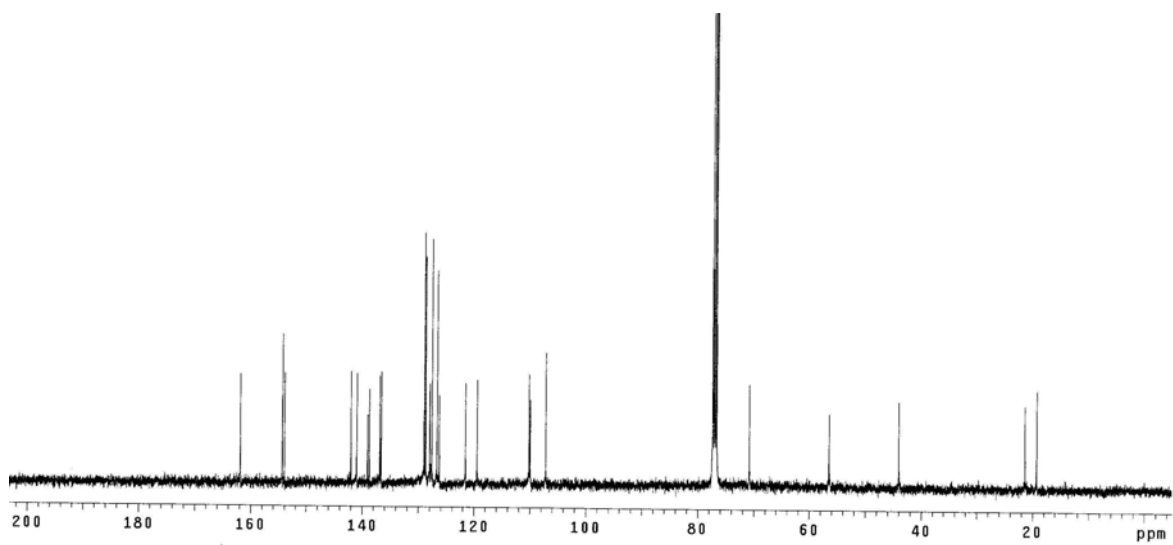

***N*-((1*R*, 2*R*)-2-(8-(benzyloxy) quinolin-2-yl)-1-(cyclopropyl-4-methylbenzenesulfonamide)**

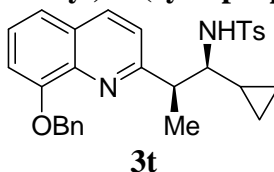

In accordance with the general procedure, 6-benzyloxy-2-vinylquinoline **1e** (207 mg, 0.79 mmol, 300 mol%) was coupled to imine **2k** (60 mg, 0.26 mmol, 100 mol%) to provide the title compound (107 mg, 0.22 mmol) as a pale yellow thick syrup in 81% yield after purification by flash silica gel column chromatography (Inseparable mixture of diastereomers in 6:1 ratio,  $R_f$  = 0.32, 15% EtOAc/hexanes, gradient: 10 - 15 % EtOAc/hexanes). *Spectral data is reported for the major isomer.*

**<sup>1</sup>H NMR** (400 MHz, CDCl<sub>3</sub>): δ 7.98 (d,  $J$  = 8.4 Hz, 1H), 7.63 (d,  $J$  = 8.0 Hz, 2H), 7.59 (d,  $J$  = 7.6 Hz, 1H), 7.40-7.23 (m, 7H), 7.06 (d,  $J$  = 7.2 Hz, 1H), 6.98 (d,  $J$  = 8.0 Hz, 2H), 5.41 (d,  $J$  = 6.4 Hz, 1H), 5.34 (dd,  $J$  = 19.6, 12.0 Hz, 2H), 3.12-3.09 (m, 1H), 2.93 (ddd,  $J$  = 10.8, 7.6, 3.6 Hz, 1H), 2.26 (s, 3H), 1.38 (d,  $J$  = 7.6 Hz, 3H), 0.89-0.81 (m, 1H), 0.44-0.38 (m, 1H), 0.31-0.25 (m, 1H), 0.18-0.11 (m, 1H), 0.07-0.01 (m, 1H).

**<sup>13</sup>C NMR** (100 MHz, CDCl<sub>3</sub>): δ 161.5, 154.0, 142.2, 139.0, 138.6, 136.7, 136.4, 129.0, 128.5, 128.3, 127.8, 127.7, 127.6, 126.8, 120.5, 119.3, 109.9, 70.6, 62.0, 44.3, 21.3, 15.9, 12.6, 4.1, 2.8.

**HRMS** Calcd. for C<sub>29</sub>H<sub>31</sub>N<sub>2</sub>O<sub>3</sub>S (M+1): 487.2055, Found: 487.2066.

**FTIR** (NaCl Film): 3210, 3063, 2954, 1599, 1562, 1452, 1322, 1261, 1157, 1098, 834, 730, 669, 663 cm<sup>-1</sup>.

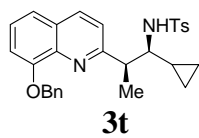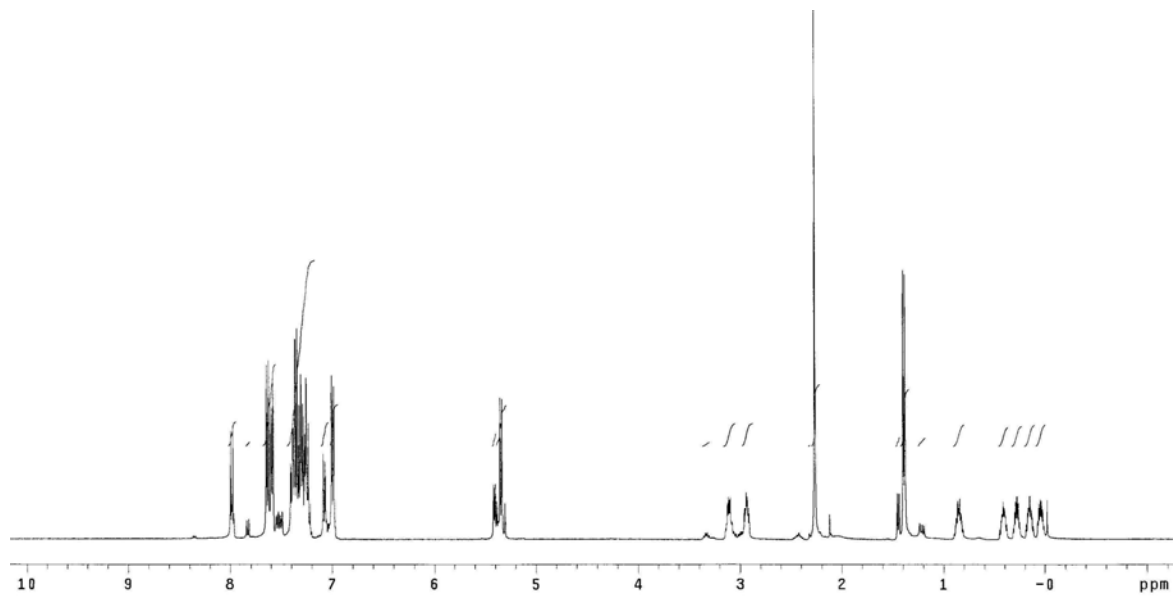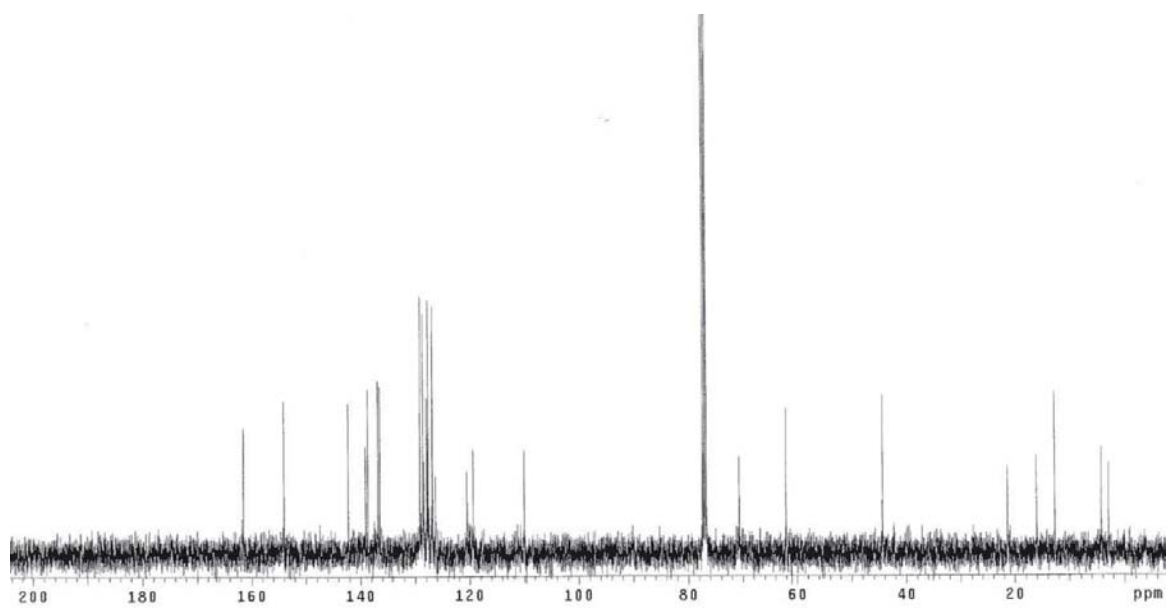



***N*-((1*R*, 2*R*)-2-(8-(benzyloxy) quinolin-2-yl)-5methylhexan-3-yl)-4-methylbenzenesulfonamide**

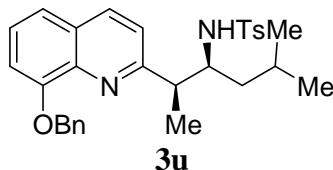

In accordance with the general procedure, 6-benzyloxy-2-vinylquinoline **1e** (207 mg, 0.79 mmol, 300 mol%) was coupled to imine **2i** (63 mg, 0.26 mmol, 100 mol%) to provide the title compound (90 mg, 0.18 mmol) as a pale yellow thick syrup in 68% yield after purification by flash silica gel column chromatography (Inseparable mixture of diastereomers in 8:1 ratio,  $R_f = 0.30$ , 25% EtOAc/hexanes, gradient: 10 - 25 % EtOAc/hexanes). *Spectral data is reported for the major isomer.*

**<sup>1</sup>H NMR** (400 MHz, CDCl<sub>3</sub>):  $\delta$  7.97 (d,  $J = 8.8$  Hz, 1H), 7.63-7.60 (m, 5H), 7.42-7.37 (m, 3H), 7.32-7.30 (m, 2H), 7.16 (d,  $J = 8.8$  Hz, 1H), 7.11 (dd,  $J = 7.6, 1.2$  Hz, 1H), 6.95 (d,  $J = 8.4$  Hz, 2H), 5.37 (dd,  $J = 18.8, 11.6$  Hz, 2H), 3.55-3.48 (m, 1H), 3.03 (ddd,  $J = 14.8, 7.2, 4.0$  Hz, 1H), 2.26 (s, 3H), 1.83-1.73 (m, 1H), 1.27 (d,  $J = 7.2$  Hz, 3H), 1.20-1.16 (m, 2H), 0.87 (d,  $J = 6.4$  Hz, 3H), 0.77 (d,  $J = 6.4$  Hz, 3H).

**<sup>13</sup>C NMR** (100 MHz, CDCl<sub>3</sub>):  $\delta$  161.3, 154.0, 142.2, 139.1, 138.4, 136.7, 136.4, 129.0, 128.6, 128.5, 127.9, 127.8, 127.6, 126.7, 126.2, 120.1, 119.3, 109.8, 70.6, 56.6, 42.1, 40.2, 23.9, 23.1, 21.7, 15.1.

**HRMS** Calcd. for C<sub>30</sub>H<sub>35</sub>N<sub>2</sub>O<sub>3</sub>S (M+1): 503.2368, Found: 503.2372.

**FTIR** (NaCl Film): 3200, 3063, 2954, 2868, 1599, 1503, 1453, 1324, 1262, 1160, 1094, 837, 735, 696, 665 cm<sup>-1</sup>.

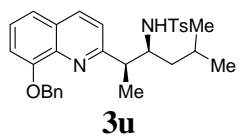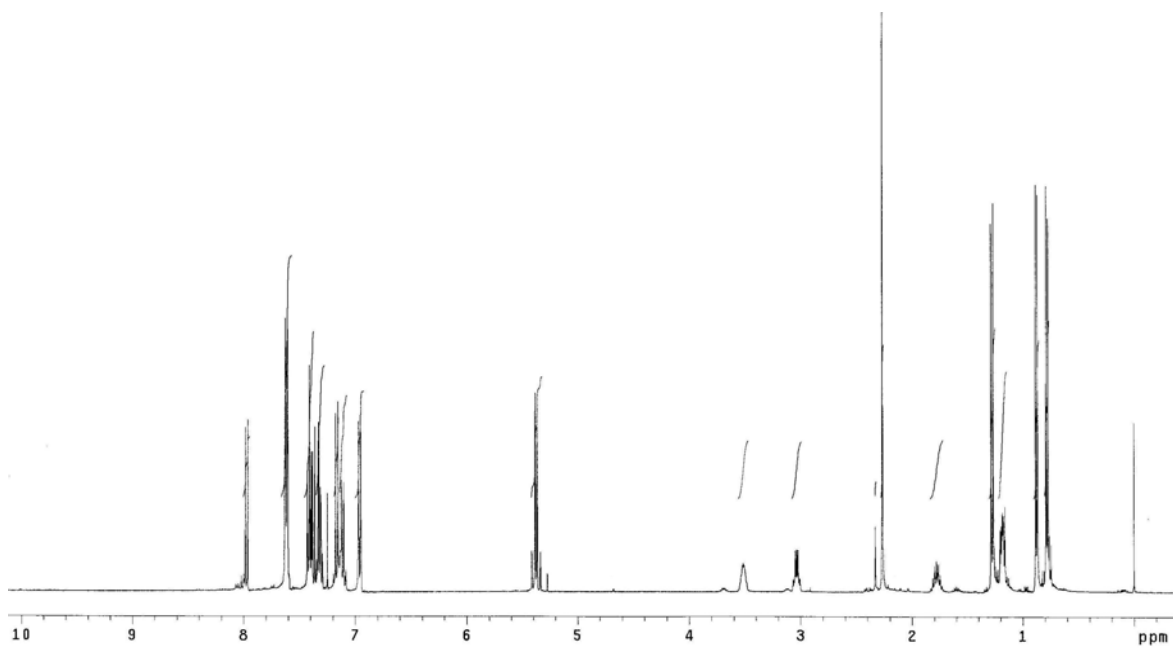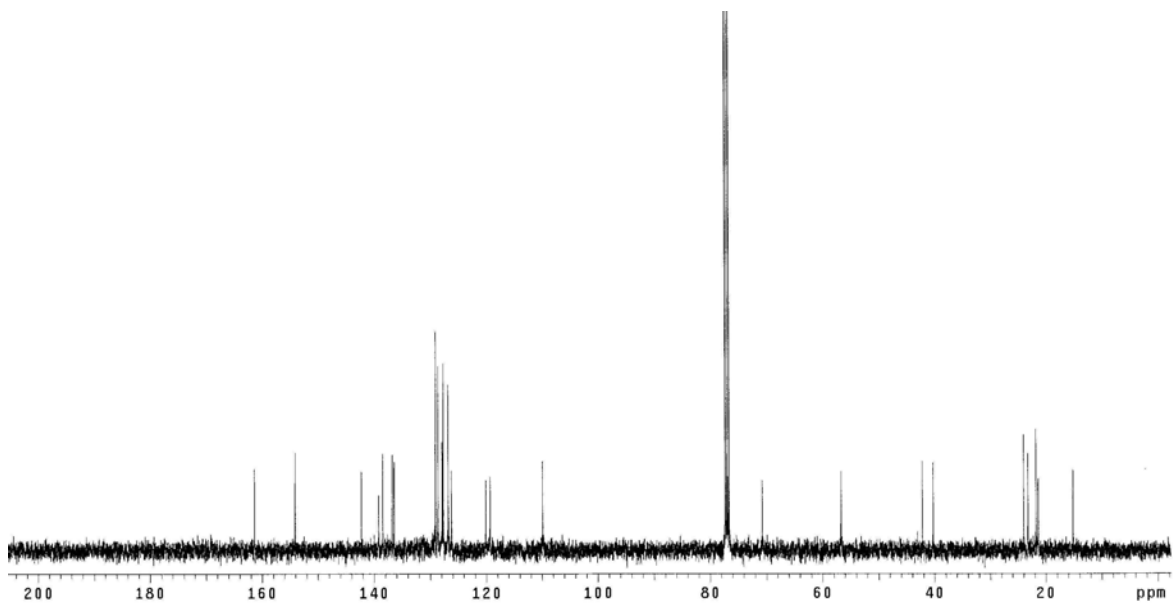

***N*-((1*R*, 2*R*)-2-(8-(benzyloxy) quinolin-2-yl)-1-(thiophen-2-yl) propyl)-4-methylbenzenesulfonamide**

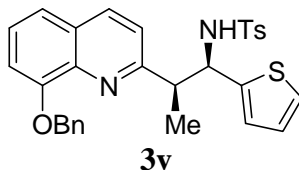

In accordance with the general procedure, 6-benzyloxy-2-vinylquinoline **1e** (207 mg, 0.79 mmol, 300 mol%) was coupled to imine **2f** (70 mg, 0.26 mmol, 100 mol%) to provide the title compound (112 mg, 0.21 mmol) as a pale brown liquid in 79% yield after purification by flash silica gel column chromatography (Inseparable mixture of diastereomers in 6:1 ratio,  $R_f = 0.27$ , 25% EtOAc/hexanes, gradient: 10 - 25 % EtOAc/hexanes). *Spectral data is reported for the major isomer.*

**<sup>1</sup>H NMR** (400 MHz, CDCl<sub>3</sub>):  $\delta$  8.55 (d,  $J = 7.2$  Hz, 1H), 7.95 (d,  $J = 8.4$  Hz, 1H), 7.59 (d,  $J = 7.6$  Hz, 2H), 7.42-7.28 (m, 7H), 7.11-7.08 (m, 2H), 6.89 (d,  $J = 4.0$  Hz, 1H), 6.82 (d,  $J = 8.0$  Hz, 2H), 6.68-6.64 (m, 2H), 5.45 (dd,  $J = 18.8, 11.6$  Hz, 2H), 4.94 (dd,  $J = 8.0, 4.0$  Hz, 1H), 3.60-3.54 (m, 1H), 2.21 (s, 3H), 1.34 (d,  $J = 7.6$  Hz, 3H).

**<sup>13</sup>C NMR** (100 MHz, CDCl<sub>3</sub>):  $\delta$  160.4, 153.8, 142.0, 141.9, 138.7, 137.9, 136.8, 136.6, 128.7, 128.6, 128.0, 127.8, 127.3, 126.6, 126.5, 126.4, 125.6, 124.7, 120.5, 129.3, 110.2, 70.6, 58.5, 44.8, 21.2, 15.9.

**HRMS** Calcd. for C<sub>30</sub>H<sub>29</sub>N<sub>2</sub>O<sub>3</sub>S<sub>2</sub> (M+1): 529.1620, Found: 529.1620.

**FTIR** (NaCl Film): 3063, 2926, 1564, 1503, 1452, 1430, 1324, 1261, 1157, 1094, 836, 696, 665 cm<sup>-1</sup>.

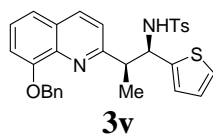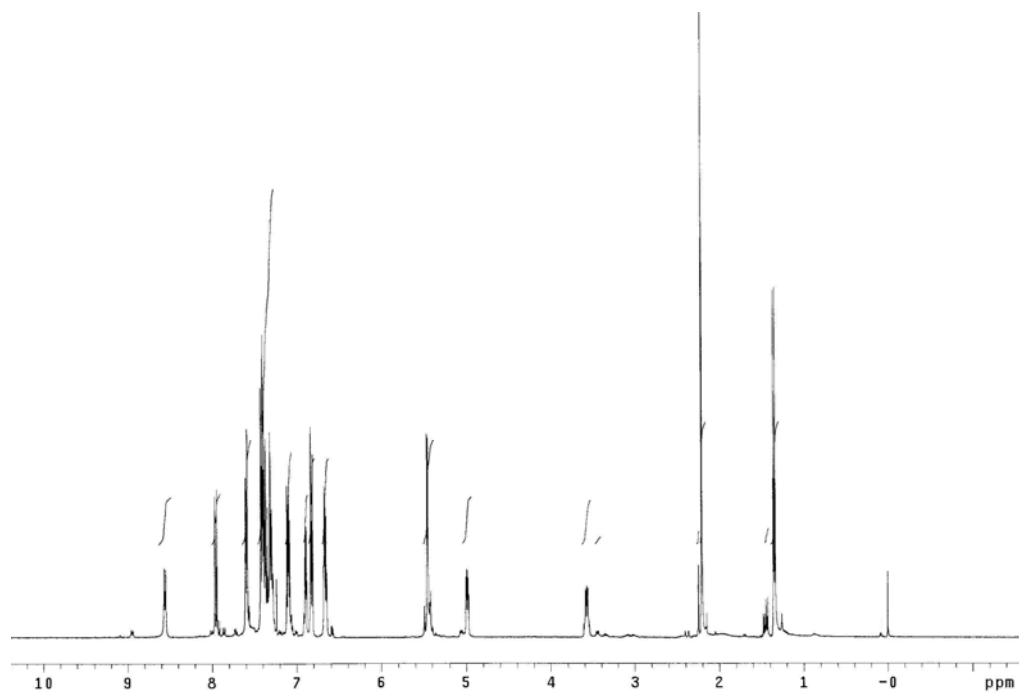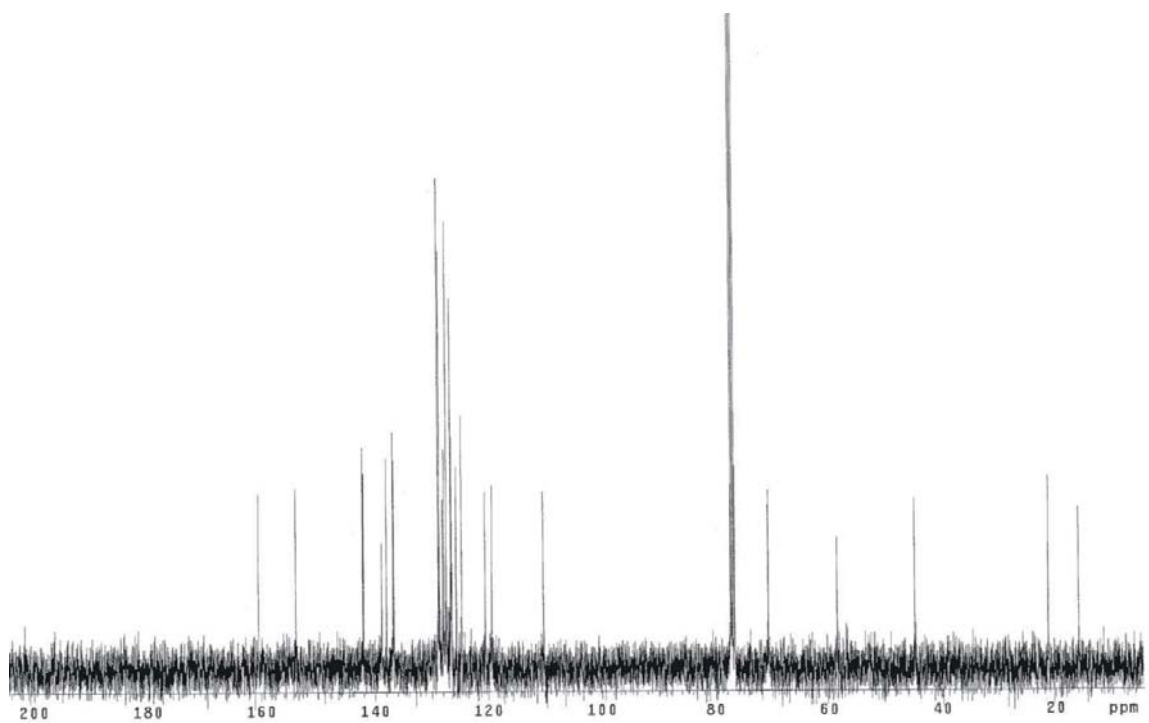

### III. Deuterium Labeling Experiment

#### *N*-((2*S*, 1*R*)-3-(6-bromopyridin-2-yl) butan-2-yl)-4-methylbenzenesulfonamide (Deuterio)

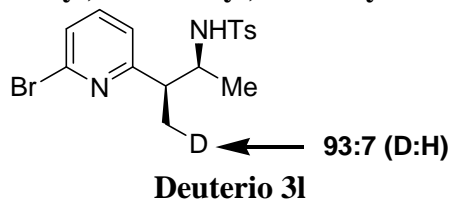

In accordance with the general procedure, 6-bromo-2-vinylpyridine **1a** (144 mg, 0.79 mmol, 300 mol%) was coupled to imine **2I** (52 mg, 0.26 mmol, 100 mol%) under deuterium gas (99.6% pure) atmosphere to provide the title compound (66 mg, 0.17 mmol) as a colorless liquid in 65% yield after purification by flash silica gel column chromatography (Inseparable mixture of diastereomers in 11:1 ratio,  $R_f = 0.25$ , 15% EtOAc/hexanes). *Spectral data is reported for the major isomer.*

**<sup>1</sup>H NMR** (400 MHz, CDCl<sub>3</sub>):  $\delta$  7.67 (d,  $J = 8.0$  Hz, 2H), 7.40 (t,  $J = 7.6$  Hz, 1H), 7.26 (d,  $J = 8.0$  Hz, 1H), 7.22 (d,  $J = 8.0$  Hz, 2H), 7.02 (d,  $J = 7.2$  Hz, 1H), 5.44 (d,  $J = 7.6$  Hz, 1H), 3.61-3.52 (m, 1H), 2.91-2.82 (m, 1H), 2.39 (s, 3H), 1.25-1.21 (m, 2H), 1.03 (d,  $J = 6.4$  Hz, 3H).

**<sup>13</sup>C NMR** (100 MHz, CDCl<sub>3</sub>):  $\delta$  164.0, 142.9, 141.2, 138.7, 137.4, 129.5, 126.9, 125.9, 121.0, 53.7, 45.4, 45.3, 21.4, 19.1, 14.8.

**HRMS** Calcd. for C<sub>16</sub>H<sub>18</sub>DBrN<sub>2</sub>O<sub>2</sub>S (M+1): 384.0413, Found: 384.0413.

**FTIR** (NaCl Film): 3272, 2975, 2322, 1580, 1553, 1433, 1380, 1324, 1126, 1089, 959, 911, 813, 706, 663 cm<sup>-1</sup>.

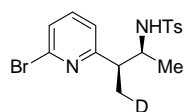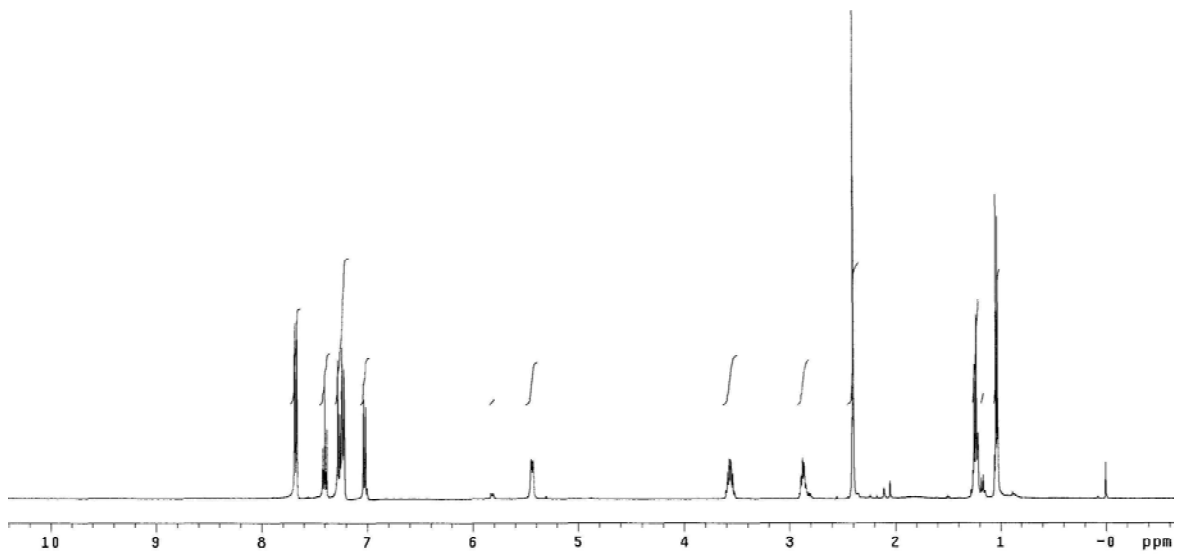

CDCl<sub>3</sub> in CHCl<sub>3</sub>

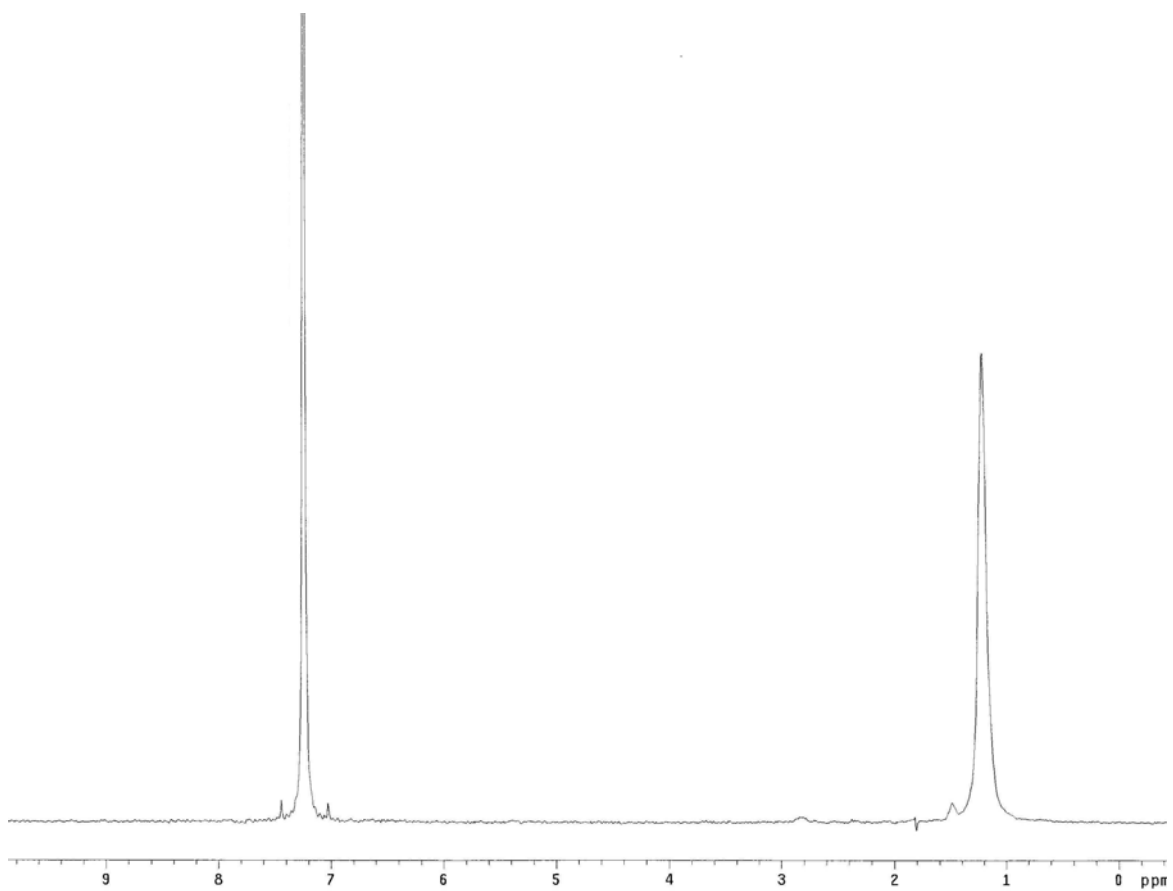

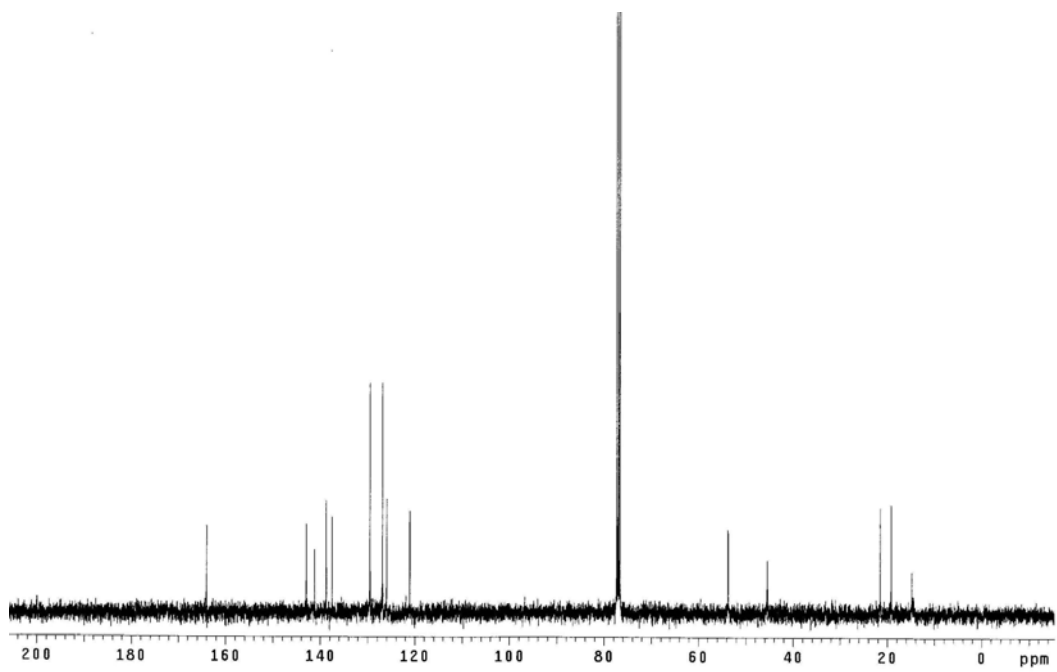

#### IV. X-Ray Crystallographic Data for Compound **3a**

View of **3a** showing the atom labeling scheme. Displacement ellipsoids are scaled to the 50% probability level.

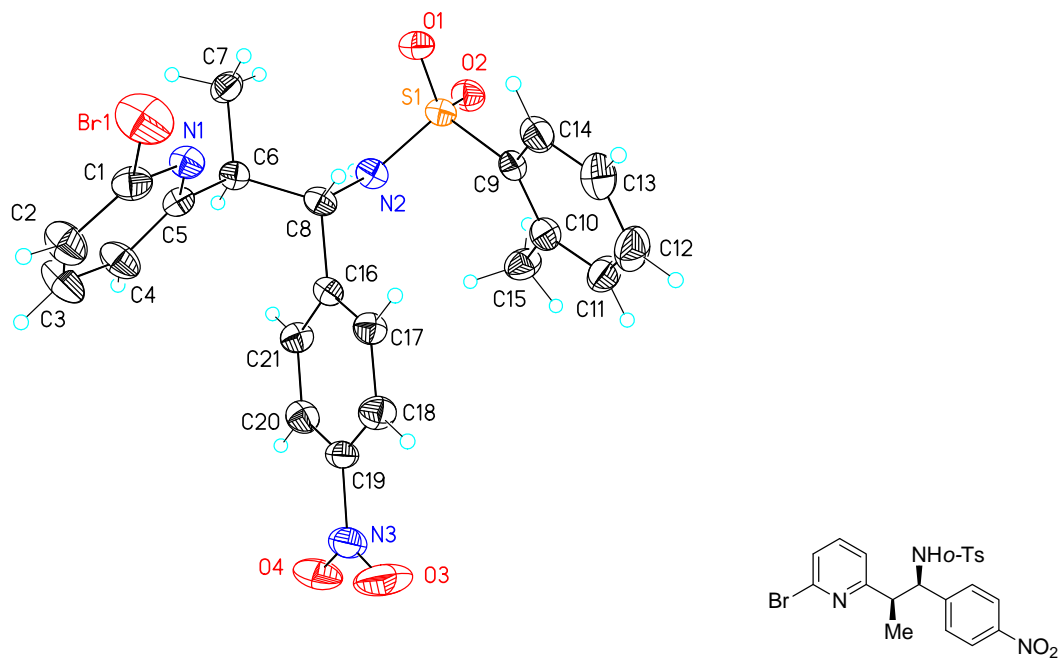

Unit cell packing diagram for **3a**. The view is approximately down the **b** axis.

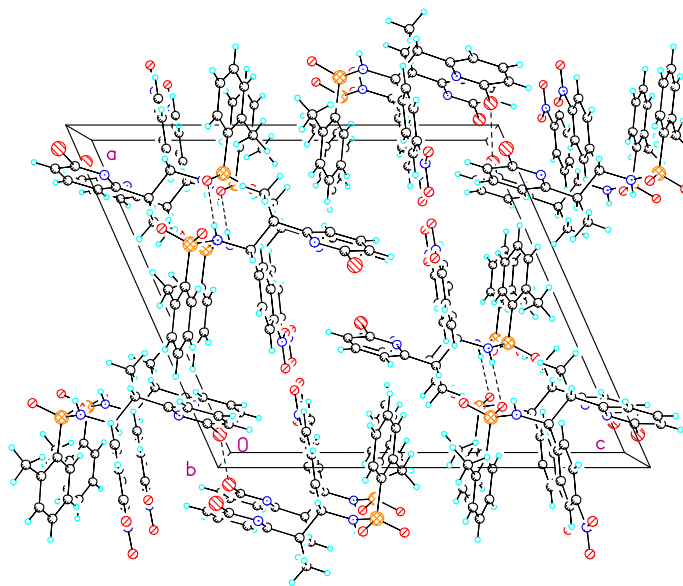



## X-ray Experimental

Table 1. Crystallographic Data for **3a**.

Table 2. Fractional coordinates and equivalent isotropic thermal parameters ( $\text{\AA}^2$ ) for the non-hydrogen atoms of **3a**.

Table 3. Bond Lengths ( $\text{\AA}$ ) and Angles ( $^\circ$ ) for the non-hydrogen atoms of **3a**.

Table 4. Anisotropic thermal parameters for the non-hydrogen atoms of **3a**.

Table 5. Fractional coordinates and isotropic thermal parameters ( $\text{\AA}^2$ ) for the hydrogen atoms of **3a**.

Table 6. Torsion Angles ( $^\circ$ ) for the non-hydrogen atoms of **3a**.

Table 7. Observed and calculated structure factor amplitudes for **3a**. Values for  $F_o$ ,  $F_c$  and  $\sigma(F_o)$  have been multiplied by 10.

Figure 1. View of **3a** showing the atom labeling scheme. Displacement ellipsoids are scaled to the 50% probability level.

Figure 2. Unit cell packing diagram for **3a**. The view is approximately down the **b** axis.

Table 7. Observed and calculated structure factor amplitudes for **3a**. Values for  $F_o$ ,  $F_c$  and  $\sigma(F_o)$  have been multiplied by 10.

X-ray Experimental for  $C_{21}H_{20}N_3O_4SBr$ : Crystals grew as colorless laths by slow evaporation from ether and hexanes. The data crystal was cut from a larger crystal and had approximate dimensions; 0.40x 0.07 x 0.06 mm. The data were collected on a Nonius Kappa CCD diffractometer using a graphite monochromator with  $MoK\alpha$  radiation ( $\lambda = 0.71073\text{\AA}$ ). A total of 215 frames of data were collected using  $\omega$ -scans with a scan range of  $1.4^\circ$  and a counting time of 259 seconds per frame. The data were collected at 153 K using an Oxford Cryostream low temperature device. Details of crystal data, data collection and structure refinement are listed in Table 1. Data reduction were performed using DENZO-SMN.<sup>1</sup> The structure was solved by direct methods using SIR97<sup>2</sup> and refined by full-matrix least-squares on  $F^2$  with anisotropic displacement parameters for the non-H atoms using SHELXL-97.<sup>3</sup> The hydrogen atoms on carbon were calculated in ideal positions with isotropic displacement parameters set to  $1.2xU_{eq}$  of the attached atom ( $1.5xU_{eq}$  for methyl hydrogen atoms). The hydrogen atom bound to N2 was observed in a  $\Delta F$  map and refined with an isotropic displacement parameter. The function,  $\Sigma w(|F_o|^2 - |F_c|^2)^2$ , was minimized, where  $w = 1/[(\sigma(F_o))^2 + (0.0359*P)^2 + (1.2475*P)]$  and  $P = (|F_o|^2 + 2|F_c|^2)/3$ .  $R_w(F^2)$  refined to 0.108, with  $R(F)$  equal to 0.0502 and a goodness of fit,  $S$ , = 1.04. Definitions used for calculating  $R(F)$ ,  $R_w(F^2)$  and the goodness of fit,  $S$ , are given below.<sup>4</sup> The data were checked for secondary extinction effects but no correction was necessary. Neutral atom scattering factors and values used to calculate the linear absorption coefficient are from the International Tables for X-ray Crystallography (1992).<sup>5</sup> All figures were generated using SHELXTL/PC.<sup>6</sup> Tables of positional and thermal parameters, bond lengths and angles, torsion angles, figures and lists of observed and calculated structure factors are located in tables 1 through 7.

## References

- 1) DENZO-SMN. (1997). Z. Otwinowski and W. Minor, Methods in Enzymology, **276**: Macromolecular Crystallography, part A, 307 – 326, C. W. Carter, Jr. and R. M. Sweets, Editors, Academic Press.
- 2) SIR97. (1999). A program for crystal structure solution. Altomare A., Burla M.C., Camalli M., Cascarano G.L., Giacovazzo C. , Guagliardi A., Moliterni A.G.G., Polidori G., Spagna R. J. Appl. Cryst. 32, 115-119.
- 3) Sheldrick, G. M. (1994). SHELXL97. Program for the Refinement of Crystal Structures. University of Gottingen, Germany.
- 4)  $R_w(F^2) = \{ \sum w(|F_o|^2 - |F_c|^2)^2 / \sum w(|F_o|^4) \}^{1/2}$  where w is the weight given each reflection.  
 $R(F) = \sum (|F_o| - |F_c|) / \sum |F_o|$  for reflections with  $F_o > 4(\sigma(F_o))$ .  
 $S = [ \sum w(|F_o|^2 - |F_c|^2)^2 / (n - p) ]^{1/2}$ , where n is the number of reflections and p is the number of refined parameters.
- 5) International Tables for X-ray Crystallography (1992). Vol. C, Tables 4.2.6.8 and 6.1.1.4, A. J. C. Wilson, editor, Boston: Kluwer Academic Press.
- 6) Sheldrick, G. M. (1994). SHELXTL/PC (Version 5.03). Siemens Analytical X-ray Instruments, Inc., Madison, Wisconsin, USA.

Table 1. Crystal data and structure refinement for **3a**.

|                                   |                                                                    |                  |
|-----------------------------------|--------------------------------------------------------------------|------------------|
| Identification code               | brpyr                                                              |                  |
| Empirical formula                 | C <sub>21</sub> H <sub>20</sub> Br N <sub>3</sub> O <sub>4</sub> S |                  |
| Formula weight                    | 490.37                                                             |                  |
| Temperature                       | 153(2) K                                                           |                  |
| Wavelength                        | 0.71070 Å                                                          |                  |
| Crystal system                    | Monoclinic                                                         |                  |
| Space group                       | P21/n                                                              |                  |
| Unit cell dimensions              | a = 16.3587(8) Å                                                   | α = 90°.         |
|                                   | b = 7.6346(5) Å                                                    | β = 113.997(2)°. |
|                                   | c = 18.8937(12) Å                                                  | γ = 90°.         |
| Volume                            | 2155.7(2) Å <sup>3</sup>                                           |                  |
| Z                                 | 4                                                                  |                  |
| Density (calculated)              | 1.511 Mg/m <sup>3</sup>                                            |                  |
| Absorption coefficient            | 2.036 mm <sup>-1</sup>                                             |                  |
| F(000)                            | 1000                                                               |                  |
| Crystal size                      | 0.40 x 0.07 x 0.06 mm                                              |                  |
| Theta range for data collection   | 2.13 to 27.47°.                                                    |                  |
| Index ranges                      | -21 ≤ h ≤ 14, -9 ≤ k ≤ 9, -21 ≤ l ≤ 24                             |                  |
| Reflections collected             | 15100                                                              |                  |
| Independent reflections           | 4907 [R(int) = 0.0662]                                             |                  |
| Completeness to theta = 27.47°    | 99.4 %                                                             |                  |
| Absorption correction             | Analytical                                                         |                  |
| Max. and min. transmission        | 0.908 and 0.500                                                    |                  |
| Refinement method                 | Full-matrix least-squares on F <sup>2</sup>                        |                  |
| Data / restraints / parameters    | 4907 / 0 / 276                                                     |                  |
| Goodness-of-fit on F <sup>2</sup> | 1.038                                                              |                  |
| Final R indices [I > 2σ(I)]       | R1 = 0.0502, wR2 = 0.0916                                          |                  |
| R indices (all data)              | R1 = 0.0986, wR2 = 0.1078                                          |                  |
| Largest diff. peak and hole       | 0.445 and -0.408 e.Å <sup>-3</sup>                                 |                  |

Table 2. Atomic coordinates ( $\times 10^4$ ) and equivalent isotropic displacement parameters ( $\text{\AA}^2 \times 10^3$ ) for **3a**.  $U(\text{eq})$  is defined as one third of the trace of the orthogonalized  $U^{ij}$  tensor.

|     | x       | y        | z       | $U(\text{eq})$ |
|-----|---------|----------|---------|----------------|
| Br1 | 4165(1) | 1463(1)  | 4775(1) | 55(1)          |
| S1  | 3563(1) | 4255(1)  | 8159(1) | 29(1)          |
| O1  | 3298(1) | 2612(3)  | 7751(1) | 36(1)          |
| O2  | 3124(1) | 4750(3)  | 8651(1) | 36(1)          |
| O3  | 7113(2) | 10575(4) | 7433(2) | 69(1)          |
| O4  | 6088(2) | 12550(3) | 7115(2) | 52(1)          |
| N1  | 3510(2) | 4013(3)  | 5423(1) | 28(1)          |
| N2  | 3425(2) | 5860(3)  | 7572(2) | 27(1)          |
| N3  | 6342(2) | 11033(4) | 7251(2) | 40(1)          |
| C1  | 3756(2) | 3770(4)  | 4851(2) | 32(1)          |
| C2  | 3728(2) | 4992(4)  | 4306(2) | 42(1)          |
| C3  | 3434(3) | 6638(4)  | 4387(2) | 49(1)          |
| C4  | 3179(2) | 6966(4)  | 4988(2) | 39(1)          |
| C5  | 3211(2) | 5631(4)  | 5491(2) | 26(1)          |
| C6  | 2896(2) | 5865(4)  | 6135(2) | 25(1)          |
| C7  | 2163(2) | 4544(4)  | 6052(2) | 33(1)          |
| C8  | 3704(2) | 5745(4)  | 6926(2) | 26(1)          |
| C9  | 4737(2) | 4142(4)  | 8682(2) | 28(1)          |
| C10 | 5220(2) | 5562(4)  | 9128(2) | 32(1)          |
| C11 | 6142(2) | 5330(5)  | 9517(2) | 38(1)          |
| C12 | 6565(2) | 3801(5)  | 9467(2) | 46(1)          |
| C13 | 6073(2) | 2410(5)  | 9024(2) | 42(1)          |
| C14 | 5153(2) | 2585(4)  | 8634(2) | 34(1)          |
| C15 | 4808(2) | 7271(4)  | 9209(2) | 39(1)          |
| C16 | 4405(2) | 7149(4)  | 7019(2) | 24(1)          |
| C17 | 5302(2) | 6694(4)  | 7254(2) | 29(1)          |
| C18 | 5941(2) | 7954(4)  | 7336(2) | 34(1)          |
| C19 | 5672(2) | 9672(4)  | 7181(2) | 29(1)          |
| C20 | 4788(2) | 10171(4) | 6951(2) | 33(1)          |
| C21 | 4159(2) | 8906(4)  | 6881(2) | 30(1)          |

Table 3. Bond lengths [ $\text{\AA}$ ] and angles [ $^\circ$ ] for **3a**.

|          |            |           |          |
|----------|------------|-----------|----------|
| Br1-C1   | 1.911(3)   | C8-C16    | 1.527(4) |
| S1-O2    | 1.436(2)   | C8-H8     | 1.00     |
| S1-O1    | 1.444(2)   | C9-C14    | 1.390(4) |
| S1-N2    | 1.607(3)   | C9-C10    | 1.404(4) |
| S1-C9    | 1.770(3)   | C10-C11   | 1.393(4) |
| O3-N3    | 1.217(4)   | C10-C15   | 1.505(4) |
| O4-N3    | 1.221(3)   | C11-C12   | 1.380(5) |
| N1-C1    | 1.312(4)   | C11-H11   | 0.95     |
| N1-C5    | 1.354(4)   | C12-C13   | 1.388(5) |
| N2-C8    | 1.469(4)   | C12-H12   | 0.95     |
| N2-H2N   | 0.77(3)    | C13-C14   | 1.387(5) |
| N3-C19   | 1.477(4)   | C13-H13   | 0.95     |
| C1-C2    | 1.375(4)   | C14-H14   | 0.95     |
| C2-C3    | 1.376(5)   | C15-H15A  | 0.98     |
| C2-H2    | 0.95       | C15-H15B  | 0.98     |
| C3-C4    | 1.384(4)   | C15-H15C  | 0.98     |
| C3-H3    | 0.95       | C16-C17   | 1.393(4) |
| C4-C5    | 1.380(4)   | C16-C21   | 1.395(4) |
| C4-H4    | 0.95       | C17-C18   | 1.382(4) |
| C5-C6    | 1.512(4)   | C17-H17   | 0.95     |
| C6-C7    | 1.525(4)   | C18-C19   | 1.377(4) |
| C6-C8    | 1.543(4)   | C18-H18   | 0.95     |
| C6-H6    | 1.00       | C19-C20   | 1.383(4) |
| C7-H7A   | 0.98       | C20-C21   | 1.377(4) |
| C7-H7B   | 0.98       | C20-H20   | 0.95     |
| C7-H7C   | 0.98       | C21-H21   | 0.95     |
| O2-S1-O1 | 116.98(13) | C8-N2-S1  | 121.7(2) |
| O2-S1-N2 | 106.21(13) | C8-N2-H2N | 117(2)   |
| O1-S1-N2 | 111.50(13) | S1-N2-H2N | 114(2)   |
| O2-S1-C9 | 111.54(13) | O3-N3-O4  | 123.9(3) |
| O1-S1-C9 | 106.11(13) | O3-N3-C19 | 118.0(3) |
| N2-S1-C9 | 103.76(14) | O4-N3-C19 | 118.1(3) |
| C1-N1-C5 | 116.8(3)   | N1-C1-C2  | 126.4(3) |

|            |          |               |          |
|------------|----------|---------------|----------|
| N1-C1-Br1  | 115.2(2) | C11-C10-C15   | 119.4(3) |
| C2-C1-Br1  | 118.3(2) | C9-C10-C15    | 124.4(3) |
| C1-C2-C3   | 116.3(3) | C12-C11-C10   | 122.5(3) |
| C1-C2-H2   | 121.8    | C12-C11-H11   | 118.8    |
| C3-C2-H2   | 121.8    | C10-C11-H11   | 118.8    |
| C2-C3-C4   | 119.5(3) | C11-C12-C13   | 120.3(3) |
| C2-C3-H3   | 120.3    | C11-C12-H12   | 119.9    |
| C4-C3-H3   | 120.3    | C13-C12-H12   | 119.9    |
| C5-C4-C3   | 119.5(3) | C14-C13-C12   | 119.0(3) |
| C5-C4-H4   | 120.3    | C14-C13-H13   | 120.5    |
| C3-C4-H4   | 120.3    | C12-C13-H13   | 120.5    |
| N1-C5-C4   | 121.5(3) | C13-C14-C9    | 120.1(3) |
| N1-C5-C6   | 116.0(2) | C13-C14-H14   | 120.0    |
| C4-C5-C6   | 122.5(3) | C9-C14-H14    | 120.0    |
| C5-C6-C7   | 110.4(2) | C10-C15-H15A  | 109.5    |
| C5-C6-C8   | 109.5(2) | C10-C15-H15B  | 109.5    |
| C7-C6-C8   | 112.9(2) | H15A-C15-H15B | 109.5    |
| C5-C6-H6   | 108.0    | C10-C15-H15C  | 109.5    |
| C7-C6-H6   | 108.0    | H15A-C15-H15C | 109.5    |
| C8-C6-H6   | 108.0    | H15B-C15-H15C | 109.5    |
| C6-C7-H7A  | 109.5    | C17-C16-C21   | 119.0(3) |
| C6-C7-H7B  | 109.5    | C17-C16-C8    | 120.5(3) |
| H7A-C7-H7B | 109.5    | C21-C16-C8    | 120.5(3) |
| C6-C7-H7C  | 109.5    | C18-C17-C16   | 120.9(3) |
| H7A-C7-H7C | 109.5    | C18-C17-H17   | 119.6    |
| H7B-C7-H7C | 109.5    | C16-C17-H17   | 119.6    |
| N2-C8-C16  | 109.6(2) | C19-C18-C17   | 118.5(3) |
| N2-C8-C6   | 111.6(2) | C19-C18-H18   | 120.7    |
| C16-C8-C6  | 112.2(2) | C17-C18-H18   | 120.7    |
| N2-C8-H8   | 107.8    | C18-C19-C20   | 122.1(3) |
| C16-C8-H8  | 107.8    | C18-C19-N3    | 119.4(3) |
| C6-C8-H8   | 107.8    | C20-C19-N3    | 118.5(3) |
| C14-C9-C10 | 121.9(3) | C21-C20-C19   | 118.8(3) |
| C14-C9-S1  | 117.0(2) | C21-C20-H20   | 120.6    |
| C10-C9-S1  | 121.1(2) | C19-C20-H20   | 120.6    |
| C11-C10-C9 | 116.3(3) | C20-C21-C16   | 120.6(3) |

C20-C21-H21

119.7

C16-C21-H21

119.7

---



Table 4. Anisotropic displacement parameters ( $\text{\AA}^2 \times 10^3$ ) for **3a**. The anisotropic displacement factor exponent takes the form:  $-2\pi^2 [ h^2 a^{*2} U^{11} + \dots + 2 h k a^* b^* U^{12} ]$

|     | U <sup>11</sup> | U <sup>22</sup> | U <sup>33</sup> | U <sup>23</sup> | U <sup>13</sup> | U <sup>12</sup> |
|-----|-----------------|-----------------|-----------------|-----------------|-----------------|-----------------|
| Br1 | 78(1)           | 32(1)           | 71(1)           | -5(1)           | 48(1)           | 11(1)           |
| S1  | 29(1)           | 28(1)           | 31(1)           | 3(1)            | 13(1)           | -5(1)           |
| O1  | 37(1)           | 28(1)           | 40(1)           | 1(1)            | 11(1)           | -8(1)           |
| O2  | 32(1)           | 42(1)           | 38(1)           | 5(1)            | 19(1)           | -3(1)           |
| O3  | 36(2)           | 58(2)           | 113(2)          | 8(2)            | 29(2)           | -14(1)          |
| O4  | 66(2)           | 28(1)           | 73(2)           | -2(1)           | 41(2)           | -13(1)          |
| N1  | 32(1)           | 23(1)           | 31(1)           | -2(1)           | 16(1)           | 1(1)            |
| N2  | 26(2)           | 27(1)           | 34(2)           | 2(1)            | 16(1)           | 4(1)            |
| N3  | 46(2)           | 38(2)           | 40(2)           | -2(1)           | 22(2)           | -12(2)          |
| C1  | 35(2)           | 26(2)           | 39(2)           | -6(2)           | 18(2)           | -2(1)           |
| C2  | 61(2)           | 39(2)           | 42(2)           | -1(2)           | 37(2)           | 5(2)            |
| C3  | 74(3)           | 37(2)           | 49(2)           | 14(2)           | 40(2)           | 6(2)            |
| C4  | 54(2)           | 26(2)           | 46(2)           | 6(2)            | 31(2)           | 7(2)            |
| C5  | 23(2)           | 26(2)           | 28(2)           | -4(1)           | 9(1)            | -3(1)           |
| C6  | 24(2)           | 25(2)           | 28(2)           | 0(1)            | 12(1)           | 1(1)            |
| C7  | 31(2)           | 37(2)           | 29(2)           | -7(2)           | 11(1)           | -8(2)           |
| C8  | 31(2)           | 19(1)           | 31(2)           | 0(1)            | 17(2)           | 3(1)            |
| C9  | 33(2)           | 29(2)           | 22(2)           | 3(1)            | 10(1)           | -3(1)           |
| C10 | 34(2)           | 35(2)           | 28(2)           | 1(2)            | 14(2)           | -2(2)           |
| C11 | 30(2)           | 44(2)           | 35(2)           | -2(2)           | 8(2)            | -3(2)           |
| C12 | 30(2)           | 59(2)           | 42(2)           | 7(2)            | 8(2)            | 8(2)            |
| C13 | 42(2)           | 48(2)           | 36(2)           | 5(2)            | 15(2)           | 11(2)           |
| C14 | 44(2)           | 31(2)           | 30(2)           | 2(2)            | 16(2)           | 1(2)            |
| C15 | 38(2)           | 30(2)           | 45(2)           | -8(2)           | 13(2)           | -5(2)           |
| C16 | 30(2)           | 21(1)           | 25(2)           | 0(1)            | 15(1)           | 1(1)            |
| C17 | 29(2)           | 24(2)           | 34(2)           | 2(1)            | 14(2)           | 3(1)            |
| C18 | 27(2)           | 37(2)           | 41(2)           | 1(2)            | 18(2)           | 1(2)            |
| C19 | 34(2)           | 27(2)           | 29(2)           | -4(1)           | 17(2)           | -9(1)           |
| C20 | 42(2)           | 23(2)           | 34(2)           | -2(1)           | 17(2)           | 1(2)            |
| C21 | 28(2)           | 26(2)           | 36(2)           | -2(1)           | 13(2)           | 1(1)            |

Table 5. Hydrogen coordinates ( $\times 10^4$ ) and isotropic displacement parameters ( $\text{\AA}^2 \times 10^3$ ) for **3a**.

|      | x        | y        | z        | U(eq) |
|------|----------|----------|----------|-------|
| H2   | 3903     | 4714     | 3898     | 51    |
| H3   | 3406     | 7541     | 4032     | 58    |
| H4   | 2983     | 8101     | 5055     | 46    |
| H6   | 2634     | 7067     | 6087     | 30    |
| H7A  | 1669     | 4676     | 5541     | 49    |
| H7B  | 1944     | 4753     | 6456     | 49    |
| H7C  | 2406     | 3355     | 6104     | 49    |
| H8   | 3991     | 4576     | 6955     | 31    |
| H11  | 6491     | 6259     | 9828     | 46    |
| H12  | 7195     | 3700     | 9737     | 55    |
| H13  | 6362     | 1356     | 8989     | 51    |
| H14  | 4806     | 1639     | 8334     | 41    |
| H15A | 5264     | 8006     | 9594     | 59    |
| H15B | 4324     | 7043     | 9377     | 59    |
| H15C | 4565     | 7877     | 8708     | 59    |
| H17  | 5477     | 5503     | 7359     | 34    |
| H18  | 6552     | 7641     | 7495     | 41    |
| H20  | 4618     | 11365    | 6844     | 39    |
| H21  | 3552     | 9234     | 6736     | 36    |
| H2N  | 3012(19) | 6420(30) | 7510(16) | 13(8) |

Table 6. Torsion angles [°] for **3a**.

|              |           |                 |           |
|--------------|-----------|-----------------|-----------|
| O2-S1-N2-C8  | -173.5(2) | C14-C9-C10-C11  | 0.5(4)    |
| O1-S1-N2-C8  | -45.0(3)  | S1-C9-C10-C11   | 179.9(2)  |
| C9-S1-N2-C8  | 68.8(3)   | C14-C9-C10-C15  | -179.3(3) |
| C5-N1-C1-C2  | -1.0(5)   | S1-C9-C10-C15   | 0.0(4)    |
| C5-N1-C1-Br1 | -179.6(2) | C9-C10-C11-C12  | 0.4(5)    |
| N1-C1-C2-C3  | 1.7(5)    | C15-C10-C11-C12 | -179.8(3) |
| Br1-C1-C2-C3 | -179.6(3) | C10-C11-C12-C13 | -0.7(5)   |
| C1-C2-C3-C4  | -0.7(5)   | C11-C12-C13-C14 | 0.0(5)    |
| C2-C3-C4-C5  | -1.0(6)   | C12-C13-C14-C9  | 0.8(5)    |
| C1-N1-C5-C4  | -0.9(4)   | C10-C9-C14-C13  | -1.1(4)   |
| C1-N1-C5-C6  | 177.7(3)  | S1-C9-C14-C13   | 179.5(2)  |
| C3-C4-C5-N1  | 1.8(5)    | N2-C8-C16-C17   | 106.0(3)  |
| C3-C4-C5-C6  | -176.6(3) | C6-C8-C16-C17   | -129.5(3) |
| N1-C5-C6-C7  | -56.3(3)  | N2-C8-C16-C21   | -73.2(3)  |
| C4-C5-C6-C7  | 122.3(3)  | C6-C8-C16-C21   | 51.3(3)   |
| N1-C5-C6-C8  | 68.6(3)   | C21-C16-C17-C18 | -1.2(4)   |
| C4-C5-C6-C8  | -112.9(3) | C8-C16-C17-C18  | 179.6(3)  |
| S1-N2-C8-C16 | -119.2(2) | C16-C17-C18-C19 | 0.1(4)    |
| S1-N2-C8-C6  | 115.9(2)  | C17-C18-C19-C20 | 0.3(5)    |
| C5-C6-C8-N2  | -176.6(2) | C17-C18-C19-N3  | -178.9(3) |
| C7-C6-C8-N2  | -53.1(3)  | O3-N3-C19-C18   | 1.2(4)    |
| C5-C6-C8-C16 | 60.0(3)   | O4-N3-C19-C18   | -179.6(3) |
| C7-C6-C8-C16 | -176.5(2) | O3-N3-C19-C20   | -178.0(3) |
| O2-S1-C9-C14 | 125.9(2)  | O4-N3-C19-C20   | 1.2(4)    |
| O1-S1-C9-C14 | -2.5(3)   | C18-C19-C20-C21 | 0.5(4)    |
| N2-S1-C9-C14 | -120.1(2) | N3-C19-C20-C21  | 179.7(3)  |
| O2-S1-C9-C10 | -53.5(3)  | C19-C20-C21-C16 | -1.6(4)   |
| O1-S1-C9-C10 | 178.1(2)  | C17-C16-C21-C20 | 2.0(4)    |
| N2-S1-C9-C10 | 60.5(3)   | C8-C16-C21-C20  | -178.8(3) |

Table 7. Observed and calculated structure factors for 3a  
Page 1

| h  | k | l | 10Fo | 10Fc | 10s | h  | k | l | 10Fo | 10Fc | 10s | h   | k | l | 10Fo | 10Fc | 10s | h   | k | l | 10Fo | 10Fc | 10s | h   | k | l | 10Fo | 10Fc | 10s |
|----|---|---|------|------|-----|----|---|---|------|------|-----|-----|---|---|------|------|-----|-----|---|---|------|------|-----|-----|---|---|------|------|-----|
| 2  | 0 | 0 | 644  | 633  | 12  | 5  | 5 | 0 | 86   | 77   | 6   | -10 | 1 | 1 | 82   | 89   | 9   | 4   | 3 | 1 | 498  | 489  | 5   | -12 | 6 | 1 | 72   | 42   | 71  |
| 4  | 0 | 0 | 2001 | 1999 | 86  | 6  | 5 | 0 | 148  | 146  | 6   | -9  | 1 | 1 | 192  | 207  | 3   | 5   | 3 | 1 | 175  | 169  | 4   | -11 | 6 | 1 | 78   | 114  | 77  |
| 6  | 0 | 0 | 406  | 377  | 6   | 7  | 5 | 0 | 290  | 296  | 5   | -8  | 1 | 1 | 76   | 56   | 7   | 6   | 3 | 1 | 561  | 566  | 7   | -10 | 6 | 1 | 139  | 140  | 22  |
| 8  | 0 | 0 | 45   | 45   | 13  | 8  | 5 | 0 | 616  | 614  | 7   | -7  | 1 | 1 | 110  | 94   | 5   | 7   | 3 | 1 | 425  | 422  | 5   | -9  | 6 | 1 | 144  | 147  | 13  |
| 10 | 0 | 0 | 125  | 121  | 7   | 9  | 5 | 0 | 84   | 56   | 23  | -6  | 1 | 1 | 665  | 653  | 6   | 8   | 3 | 1 | 102  | 114  | 11  | -8  | 6 | 1 | 262  | 270  | 9   |
| 12 | 0 | 0 | 162  | 160  | 7   | 10 | 5 | 0 | 53   | 70   | 52  | -5  | 1 | 1 | 718  | 715  | 6   | 9   | 3 | 1 | 157  | 154  | 5   | -7  | 6 | 1 | 32   | 47   | 32  |
| 14 | 0 | 0 | 256  | 250  | 11  | 11 | 5 | 0 | 232  | 244  | 17  | -4  | 1 | 1 | 837  | 841  | 10  | 10  | 3 | 1 | 104  | 107  | 22  | -6  | 6 | 1 | 57   | 70   | 10  |
| 16 | 0 | 0 | 217  | 227  | 18  | 12 | 5 | 0 | 128  | 119  | 19  | -3  | 1 | 1 | 459  | 448  | 5   | 11  | 3 | 1 | 53   | 44   | 18  | -5  | 6 | 1 | 461  | 449  | 5   |
| 18 | 0 | 0 | 227  | 183  | 23  | 13 | 5 | 0 | 149  | 150  | 15  | -2  | 1 | 1 | 2256 | 2302 | 92  | 12  | 3 | 1 | 182  | 193  | 8   | -4  | 6 | 1 | 287  | 296  | 6   |
| 1  | 1 | 0 | 544  | 593  | 182 | 14 | 5 | 0 | 0    | 53   | 1   | -1  | 1 | 1 | 193  | 168  | 10  | 13  | 3 | 1 | 71   | 77   | 23  | -3  | 6 | 1 | 327  | 322  | 4   |
| 2  | 1 | 0 | 219  | 203  | 5   | 15 | 5 | 0 | 56   | 28   | 55  | 1   | 1 | 1 | 295  | 290  | 17  | 14  | 3 | 1 | 132  | 119  | 17  | -2  | 6 | 1 | 175  | 171  | 6   |
| 3  | 1 | 0 | 1394 | 1405 | 14  | 16 | 5 | 0 | 0    | 12   | 1   | 2   | 1 | 1 | 182  | 187  | 3   | 15  | 3 | 1 | 116  | 113  | 35  | -1  | 6 | 1 | 841  | 832  | 13  |
| 4  | 1 | 0 | 870  | 869  | 8   | 0  | 6 | 0 | 346  | 299  | 10  | 3   | 1 | 1 | 1796 | 1775 | 20  | 16  | 3 | 1 | 64   | 70   | 64  | 0   | 6 | 1 | 25   | 15   | 25  |
| 5  | 1 | 0 | 655  | 639  | 6   | 1  | 6 | 0 | 234  | 239  | 4   | 4   | 1 | 1 | 581  | 565  | 6   | 17  | 3 | 1 | 0    | 53   | 1   | 1   | 6 | 1 | 224  | 202  | 17  |
| 6  | 1 | 0 | 145  | 141  | 3   | 2  | 6 | 0 | 321  | 308  | 4   | 5   | 1 | 1 | 314  | 336  | 3   | 18  | 3 | 1 | 97   | 47   | 96  | 2   | 6 | 1 | 137  | 120  | 5   |
| 7  | 1 | 0 | 1445 | 1396 | 14  | 3  | 6 | 0 | 86   | 71   | 9   | 6   | 1 | 1 | 212  | 219  | 3   | -18 | 4 | 1 | 0    | 104  | 1   | 3   | 6 | 1 | 64   | 50   | 10  |
| 8  | 1 | 0 | 96   | 116  | 5   | 4  | 6 | 0 | 205  | 195  | 10  | 7   | 1 | 1 | 1006 | 969  | 9   | -17 | 4 | 1 | 111  | 49   | 111 | 4   | 6 | 1 | 536  | 526  | 6   |
| 9  | 1 | 0 | 282  | 293  | 3   | 5  | 6 | 0 | 58   | 27   | 20  | 8   | 1 | 1 | 223  | 239  | 4   | -16 | 4 | 1 | 0    | 9    | 1   | 5   | 6 | 1 | 52   | 42   | 17  |
| 10 | 1 | 0 | 330  | 332  | 4   | 6  | 6 | 0 | 535  | 544  | 6   | 9   | 1 | 1 | 272  | 277  | 3   | -15 | 4 | 1 | 102  | 71   | 19  | 6   | 6 | 1 | 77   | 71   | 12  |
| 11 | 1 | 0 | 357  | 365  | 6   | 7  | 6 | 0 | 114  | 111  | 7   | 10  | 1 | 1 | 149  | 158  | 5   | -14 | 4 | 1 | 169  | 143  | 24  | 7   | 6 | 1 | 206  | 196  | 7   |
| 12 | 1 | 0 | 38   | 44   | 29  | 8  | 6 | 0 | 315  | 334  | 5   | 11  | 1 | 1 | 11   | 17   | 11  | -13 | 4 | 1 | 174  | 147  | 22  | 8   | 6 | 1 | 244  | 229  | 7   |
| 13 | 1 | 0 | 160  | 185  | 17  | 9  | 6 | 0 | 204  | 177  | 10  | 12  | 1 | 1 | 529  | 508  | 9   | -12 | 4 | 1 | 116  | 147  | 14  | 9   | 6 | 1 | 199  | 190  | 7   |
| 14 | 1 | 0 | 191  | 175  | 13  | 10 | 6 | 0 | 195  | 183  | 31  | 13  | 1 | 1 | 139  | 127  | 14  | -11 | 4 | 1 | 244  | 247  | 22  | 10  | 6 | 1 | 82   | 88   | 31  |
| 15 | 1 | 0 | 53   | 10   | 52  | 11 | 6 | 0 | 11   | 13   | 11  | 14  | 1 | 1 | 114  | 100  | 15  | -10 | 4 | 1 | 653  | 646  | 23  | 11  | 6 | 1 | 260  | 241  | 22  |
| 16 | 1 | 0 | 103  | 100  | 19  | 12 | 6 | 0 | 134  | 122  | 15  | 15  | 1 | 1 | 137  | 144  | 17  | -9  | 4 | 1 | 98   | 97   | 8   | 12  | 6 | 1 | 0    | 17   | 1   |
| 17 | 1 | 0 | 56   | 9    | 55  | 13 | 6 | 0 | 93   | 36   | 37  | 16  | 1 | 1 | 214  | 209  | 10  | -8  | 4 | 1 | 229  | 242  | 4   | 13  | 6 | 1 | 193  | 184  | 17  |
| 19 | 1 | 0 | 85   | 23   | 85  | 14 | 6 | 0 | 70   | 93   | 56  | 17  | 1 | 1 | 0    | 11   | 1   | -7  | 4 | 1 | 70   | 78   | 14  | 14  | 6 | 1 | 0    | 69   | 1   |
| 0  | 2 | 0 | 321  | 326  | 4   | 15 | 6 | 0 | 123  | 104  | 102 | 18  | 1 | 1 | 0    | 52   | 1   | -6  | 4 | 1 | 92   | 62   | 6   | 15  | 6 | 1 | 89   | 130  | 88  |
| 1  | 2 | 0 | 216  | 204  | 3   | 1  | 7 | 0 | 707  | 693  | 9   | -19 | 2 | 1 | 184  | 135  | 32  | -5  | 4 | 1 | 429  | 418  | 4   | -14 | 7 | 1 | 64   | 9    | 64  |
| 2  | 2 | 0 | 846  | 816  | 8   | 2  | 7 | 0 | 199  | 195  | 12  | -18 | 2 | 1 | 149  | 117  | 36  | -4  | 4 | 1 | 383  | 377  | 4   | -13 | 7 | 1 | 0    | 55   | 1   |
| 3  | 2 | 0 | 625  | 616  | 6   | 3  | 7 | 0 | 77   | 88   | 12  | -16 | 2 | 1 | 198  | 170  | 11  | -3  | 4 | 1 | 394  | 367  | 3   | -12 | 7 | 1 | 314  | 286  | 12  |
| 4  | 2 | 0 | 27   | 41   | 26  | 4  | 7 | 0 | 343  | 349  | 5   | -15 | 2 | 1 | 138  | 141  | 11  | -2  | 4 | 1 | 404  | 379  | 3   | -11 | 7 | 1 | 82   | 19   | 40  |
| 5  | 2 | 0 | 537  | 549  | 6   | 5  | 7 | 0 | 191  | 188  | 5   | -14 | 2 | 1 | 77   | 57   | 42  | -1  | 4 | 1 | 796  | 788  | 8   | -10 | 7 | 1 | 119  | 72   | 18  |
| 6  | 2 | 0 | 483  | 468  | 4   | 6  | 7 | 0 | 87   | 74   | 27  | -13 | 2 | 1 | 144  | 156  | 10  | 0   | 4 | 1 | 0    | 14   | 1   | -9  | 7 | 1 | 80   | 109  | 80  |
| 7  | 2 | 0 | 156  | 169  | 5   | 7  | 7 | 0 | 54   | 54   | 27  | -12 | 2 | 1 | 156  | 150  | 5   | 1   | 4 | 1 | 912  | 885  | 8   | -8  | 7 | 1 | 528  | 520  | 10  |
| 8  | 2 | 0 | 147  | 153  | 5   | 8  | 7 | 0 | 0    | 56   | 1   | -11 | 2 | 1 | 238  | 245  | 4   | 2   | 4 | 1 | 44   | 38   | 12  | -7  | 7 | 1 | 138  | 115  | 13  |
| 9  | 2 | 0 | 894  | 884  | 9   | 9  | 7 | 0 | 113  | 134  | 32  | -10 | 2 | 1 | 300  | 298  | 4   | 3   | 4 | 1 | 104  | 95   | 5   | -6  | 7 | 1 | 306  | 316  | 7   |
| 10 | 2 | 0 | 158  | 155  | 12  | 10 | 7 | 0 | 103  | 11   | 23  | -9  | 2 | 1 | 29   | 41   | 28  | 4   | 4 | 1 | 316  | 332  | 4   | -5  | 7 | 1 | 295  | 308  | 5   |
| 11 | 2 | 0 | 335  | 336  | 5   | 11 | 7 | 0 | 72   | 73   | 72  | -8  | 2 | 1 | 450  | 471  | 5   | 5   | 4 | 1 | 430  | 433  | 5   | -4  | 7 | 1 | 47   | 38   | 23  |
| 12 | 2 | 0 | 306  | 315  | 5   | 12 | 7 | 0 | 110  | 84   | 26  | -7  | 2 | 1 | 450  | 455  | 6   | 6   | 4 | 1 | 177  | 180  | 5   | -3  | 7 | 1 | 0    | 19   | 1   |
| 13 | 2 | 0 | 273  | 268  | 9   | 13 | 7 | 0 | 171  | 165  | 22  | -6  | 2 | 1 | 557  | 526  | 7   | 7   | 4 | 1 | 627  | 642  | 8   | -2  | 7 | 1 | 289  | 291  | 5   |
| 14 | 2 | 0 | 212  | 217  | 23  | 0  | 8 | 0 | 106  | 84   | 29  | -5  | 2 | 1 | 439  | 446  | 5   | 8   | 4 | 1 | 220  | 222  | 6   | -1  | 7 | 1 | 297  | 295  | 8   |
| 15 | 2 | 0 | 0    | 18   | 1   | 1  | 8 | 0 | 130  | 135  | 11  | -4  | 2 | 1 | 963  | 976  | 10  | 9   | 4 | 1 | 168  | 192  | 8   | 0   | 7 | 1 | 414  | 404  | 6   |
| 16 | 2 | 0 | 86   | 3    | 29  | 2  | 8 | 0 | 174  | 180  | 8   | -3  | 2 | 1 | 43   | 42   | 8   | 10  | 4 | 1 | 108  | 116  | 11  | 1   | 7 | 1 | 86   | 96   | 10  |
| 17 | 2 | 0 | 137  | 63   | 24  | 3  | 8 | 0 | 380  | 373  | 9   | -2  | 2 | 1 | 1050 | 1027 | 9   | 11  | 4 | 1 | 295  | 287  | 12  | 2   | 7 | 1 | 435  | 434  | 5   |
| 18 | 2 | 0 | 0    | 80   | 1   | 4  | 8 | 0 | 99   | 131  | 30  | -1  | 2 | 1 | 670  | 656  | 6   | 13  | 4 | 1 | 0    | 14   | 1   | 3   | 7 | 1 | 40   | 18   | 39  |
| 19 | 2 | 0 | 107  | 77   | 106 | 5  | 8 | 0 | 80   | 24   | 36  | 0   | 2 | 1 | 63   | 51   | 5   | 14  | 4 | 1 | 43   | 42   | 42  | 4   | 7 | 1 | 289  | 297  | 7   |
| 1  | 3 | 0 | 601  | 597  | 5   | 6  | 8 | 0 | 228  | 217  | 23  | 1   | 2 | 1 | 374  | 365  | 4   | 15  | 4 | 1 | 0    | 66   | 1   | 5   | 7 | 1 | 135  | 136  | 9   |
| 2  | 3 | 0 | 608  | 597  | 6   | 7  | 8 | 0 | 140  | 107  | 15  | 2   | 2 | 1 | 1211 | 1183 | 15  | 16  | 4 | 1 | 94   | 28   | 38  | 6   | 7 | 1 | 463  | 449  | 16  |
| 3  | 3 | 0 | 165  | 155  | 5   | 8  | 8 | 0 | 0    | 58   | 1   | 3   | 2 | 1 | 679  | 677  | 7   | 17  | 4 | 1 | 0    | 59   | 1   | 7   | 7 | 1 | 89   | 43   | 15  |
| 4  | 3 | 0 | 1092 | 1034 | 10  | 9  | 8 | 0 | 54   | 64   | 54  | 4   | 2 | 1 | 176  | 179  | 5   | -17 | 5 | 1 | 212  | 161  | 20  | 8   | 7 | 1 | 59   | 56   | 33  |
| 5  | 3 | 0 | 1071 | 1039 | 11  | 10 | 8 | 0 | 164  | 161  | 17  | 5   | 2 | 1 | 309  | 303  | 4   | -16 | 5 | 1 | 52   | 62   | 52  | 9   | 7 | 1 | 92   | 89   | 22  |
| 6  | 3 | 0 | 266  | 288  | 5   | 11 | 8 | 0 | 176  | 193  | 20  | 6   | 2 | 1 | 91   | 93   | 5   | -15 | 5 | 1 | 114  | 114  | 24  | 10  | 7 | 1 | 268  | 250  | 27  |
| 7  | 3 | 0 | 417  | 435  | 6   | 1  | 9 | 0 | 0    | 60   | 1   | 7   | 2 | 1 | 151  | 152  | 4   | -14 | 5 | 1 | 47   | 25   | 46  | 11  | 7 | 1 | 75   | 93   | 75  |
| 8  | 3 | 0 | 184  | 195  | 5   | 2  | 9 | 0 | 240  | 230  | 19  | 8   | 2 | 1 | 515  | 516  | 5   | -13 | 5 | 1 | 0    | 65   | 1   | 12  | 7 | 1 | 76   | 52   | 76  |
| 9  | 3 | 0 | 117  | 122  | 9   | 3  | 9 | 0 | 0    | 24   | 1   | 9   | 2 | 1 | 249  | 255  | 4   | -12 | 5 | 1 | 0    | 18   | 1   | 13  | 7 | 1 | 159  | 107  | 30  |
| 10 | 3 | 0 | 221  | 231  | 5   | 4  | 9 | 0 | 94   | 110  | 47  | 10  | 2 | 1 | 351  | 350  | 5   | -11 | 5 | 1 | 212  | 185  | 16  | -11 | 8 | 1 | 0    | 42   | 1   |
| 11 | 3 | 0 | 380  | 379  | 17  | 6  | 9 | 0 | 164  | 89   | 30  | 11  | 2 | 1 | 134  | 134  | 5   | -10 | 5 | 1 | 309  | 310  | 28  | -10 | 8 | 1 | 109  | 131  | 25  |
| 12 | 3 | 0 | 81   | 96   | 11  | 7  | 9 | 0 | 117  | 155  | 47  | 12  | 2 | 1 | 31   |      |     |     |   |   |      |      |     |     |   |   |      |      |     |

Table 7. Observed and calculated structure factors for 3a  
Page 2

| h   | k | l | 10Fo | 10Fc | 10s | h   | k | l | 10Fo | 10Fc | 10s | h   | k | l | 10Fo  | 10Fc | 10s | h   | k | l | 10Fo | 10Fc | 10s | h   | k | l | 10Fo | 10Fc | 10s |
|-----|---|---|------|------|-----|-----|---|---|------|------|-----|-----|---|---|-------|------|-----|-----|---|---|------|------|-----|-----|---|---|------|------|-----|
| 0   | 9 | 1 | 121  | 108  | 25  | 3   | 2 | 2 | 1051 | 1060 | 12  | 16  | 4 | 2 | 32    | 38   | 31  | 8   | 7 | 2 | 111  | 125  | 20  | 5   | 1 | 3 | 52   | 18   | 8   |
| 1   | 9 | 1 | 158  | 191  | 15  | 4   | 2 | 2 | 66   | 82   | 7   | -17 | 5 | 2 | 151   | 56   | 26  | 9   | 7 | 2 | 66   | 25   | 32  | 6   | 1 | 3 | 1195 | 1150 | 12  |
| 2   | 9 | 1 | 54   | 41   | 54  | 5   | 2 | 2 | 226  | 219  | 5   | -16 | 5 | 2 | 212   | 189  | 24  | 10  | 7 | 2 | 95   | 101  | 95  | 7   | 1 | 3 | 518  | 514  | 5   |
| 3   | 9 | 1 | 276  | 251  | 17  | 6   | 2 | 2 | 0    | 20   | 1   | -15 | 5 | 2 | 111   | 75   | 50  | 11  | 7 | 2 | 373  | 352  | 13  | 8   | 1 | 3 | 43   | 32   | 14  |
| 4   | 9 | 1 | 60   | 89   | 59  | 7   | 2 | 2 | 272  | 289  | 3   | -14 | 5 | 2 | 195   | 178  | 12  | 12  | 7 | 2 | 81   | 10   | 53  | 9   | 1 | 3 | 35   | 32   | 35  |
| 5   | 9 | 1 | 42   | 30   | 42  | 8   | 2 | 2 | 83   | 89   | 7   | -13 | 5 | 2 | 39    | 88   | 39  | -12 | 8 | 2 | 100  | 68   | 51  | 10  | 1 | 3 | 512  | 520  | 8   |
| 6   | 9 | 1 | 0    | 39   | 1   | 9   | 2 | 2 | 393  | 379  | 5   | -12 | 5 | 2 | 82    | 84   | 31  | -11 | 8 | 2 | 95   | 54   | 36  | 11  | 1 | 3 | 110  | 143  | 28  |
| 7   | 9 | 1 | 0    | 36   | 1   | 10  | 2 | 2 | 83   | 77   | 11  | -11 | 5 | 2 | 172   | 167  | 26  | -10 | 8 | 2 | 62   | 52   | 62  | 12  | 1 | 3 | 181  | 180  | 8   |
| -18 | 0 | 2 | 0    | 17   | 1   | 11  | 2 | 2 | 136  | 146  | 8   | -10 | 5 | 2 | 597   | 598  | 10  | -9  | 8 | 2 | 166  | 155  | 16  | 13  | 1 | 3 | 72   | 104  | 72  |
| -16 | 0 | 2 | 182  | 162  | 17  | 12  | 2 | 2 | 113  | 106  | 7   | -9  | 5 | 2 | 32    | 35   | 32  | -8  | 8 | 2 | 81   | 17   | 36  | 14  | 1 | 3 | 108  | 96   | 16  |
| -14 | 0 | 2 | 26   | 85   | 25  | 13  | 2 | 2 | 119  | 139  | 14  | -8  | 5 | 2 | 254   | 257  | 4   | -7  | 8 | 2 | 128  | 94   | 23  | 15  | 1 | 3 | 203  | 179  | 16  |
| -12 | 0 | 2 | 262  | 248  | 6   | 14  | 2 | 2 | 117  | 136  | 17  | -7  | 5 | 2 | 178   | 177  | 5   | -6  | 8 | 2 | 110  | 130  | 17  | 16  | 1 | 3 | 61   | 7    | 60  |
| -10 | 0 | 2 | 276  | 291  | 5   | 15  | 2 | 2 | 122  | 101  | 21  | -6  | 5 | 2 | 291   | 293  | 3   | -5  | 8 | 2 | 242  | 252  | 13  | 17  | 1 | 3 | 8    | 71   | 8   |
| -8  | 0 | 2 | 164  | 180  | 4   | 16  | 2 | 2 | 86   | 20   | 43  | -5  | 5 | 2 | 214   | 206  | 3   | -4  | 8 | 2 | 185  | 195  | 11  | 18  | 1 | 3 | 135  | 90   | 50  |
| -6  | 0 | 2 | 637  | 684  | 7   | 17  | 2 | 2 | 94   | 96   | 50  | -4  | 5 | 2 | 321   | 316  | 4   | -3  | 8 | 2 | 332  | 328  | 10  | -19 | 2 | 3 | 0    | 46   | 1   |
| -4  | 0 | 2 | 643  | 595  | 9   | 18  | 2 | 2 | 195  | 111  | 29  | -3  | 5 | 2 | 193   | 195  | 3   | -2  | 8 | 2 | 80   | 60   | 33  | -18 | 2 | 3 | 90   | 64   | 67  |
| -2  | 0 | 2 | 789  | 804  | 19  | -19 | 3 | 2 | 189  | 108  | 29  | -2  | 5 | 2 | 404   | 408  | 4   | -1  | 8 | 2 | 39   | 21   | 39  | -17 | 2 | 3 | 41   | 25   | 40  |
| 0   | 0 | 2 | 105  | 89   | 23  | -18 | 3 | 2 | 95   | 119  | 54  | -1  | 5 | 2 | 233   | 230  | 5   | 0   | 8 | 2 | 208  | 222  | 8   | -16 | 2 | 3 | 107  | 99   | 43  |
| 2   | 0 | 2 | 594  | 591  | 8   | -17 | 3 | 2 | 32   | 27   | 31  | 0   | 5 | 2 | 62    | 55   | 12  | 1   | 8 | 2 | 245  | 251  | 7   | -15 | 2 | 3 | 78   | 45   | 19  |
| 4   | 0 | 2 | 76   | 67   | 11  | -16 | 3 | 2 | 70   | 39   | 69  | 1   | 5 | 2 | 0     | 18   | 1   | 2   | 8 | 2 | 46   | 71   | 46  | -14 | 2 | 3 | 121  | 137  | 17  |
| 6   | 0 | 2 | 504  | 507  | 6   | -15 | 3 | 2 | 0    | 12   | 1   | 2   | 5 | 2 | 816   | 806  | 8   | 3   | 8 | 2 | 214  | 218  | 8   | -13 | 2 | 3 | 59   | 75   | 21  |
| 8   | 0 | 2 | 234  | 245  | 5   | -14 | 3 | 2 | 0    | 36   | 1   | 3   | 5 | 2 | 75    | 57   | 8   | 4   | 8 | 2 | 191  | 208  | 30  | -12 | 2 | 3 | 179  | 186  | 5   |
| 10  | 0 | 2 | 393  | 387  | 11  | -13 | 3 | 2 | 116  | 119  | 8   | 4   | 5 | 2 | 508   | 490  | 11  | 5   | 8 | 2 | 0    | 55   | 1   | -11 | 2 | 3 | 21   | 12   | 21  |
| 12  | 0 | 2 | 344  | 345  | 12  | -12 | 3 | 2 | 153  | 159  | 6   | 5   | 5 | 2 | 61    | 11   | 13  | 6   | 8 | 2 | 149  | 124  | 15  | -10 | 2 | 3 | 500  | 501  | 7   |
| 14  | 0 | 2 | 148  | 112  | 19  | -11 | 3 | 2 | 149  | 141  | 5   | 6   | 5 | 2 | 316   | 317  | 4   | 7   | 8 | 2 | 69   | 74   | 49  | -9  | 2 | 3 | 429  | 431  | 6   |
| 16  | 0 | 2 | 41   | 39   | 41  | -10 | 3 | 2 | 22   | 17   | 22  | 7   | 5 | 2 | 44    | 60   | 44  | 8   | 8 | 2 | 173  | 167  | 17  | -8  | 2 | 3 | 716  | 698  | 7   |
| 18  | 0 | 2 | 71   | 63   | 71  | -9  | 3 | 2 | 66   | 80   | 38  | 8   | 5 | 2 | 191   | 199  | 7   | 9   | 8 | 2 | 194  | 149  | 31  | -7  | 2 | 3 | 246  | 225  | 9   |
| -19 | 1 | 2 | 87   | 103  | 87  | -8  | 3 | 2 | 147  | 165  | 5   | 9   | 5 | 2 | 136   | 136  | 10  | 10  | 8 | 2 | 69   | 13   | 68  | -6  | 2 | 3 | 81   | 98   | 6   |
| -18 | 1 | 2 | 69   | 76   | 68  | -7  | 3 | 2 | 732  | 736  | 10  | 10  | 5 | 2 | 196   | 200  | 13  | -8  | 9 | 2 | 105  | 142  | 66  | -5  | 2 | 3 | 57   | 34   | 17  |
| -17 | 1 | 2 | 238  | 232  | 11  | -6  | 3 | 2 | 264  | 240  | 4   | 11  | 5 | 2 | 84    | 75   | 84  | -7  | 9 | 2 | 57   | 19   | 56  | -4  | 2 | 3 | 1202 | 1219 | 14  |
| -16 | 1 | 2 | 132  | 141  | 11  | -5  | 3 | 2 | 501  | 507  | 5   | 12  | 5 | 2 | 107   | 34   | 30  | -6  | 9 | 2 | 18   | 19   | 17  | -3  | 2 | 3 | 212  | 194  | 3   |
| -15 | 1 | 2 | 57   | 17   | 56  | -4  | 3 | 2 | 261  | 266  | 3   | 13  | 5 | 2 | 0     | 17   | 1   | -5  | 9 | 2 | 0    | 28   | 1   | -2  | 2 | 3 | 334  | 319  | 5   |
| -14 | 1 | 2 | 80   | 95   | 12  | -3  | 3 | 2 | 671  | 643  | 6   | 14  | 5 | 2 | 102   | 84   | 32  | -4  | 9 | 2 | 152  | 169  | 30  | -1  | 2 | 3 | 755  | 704  | 10  |
| -13 | 1 | 2 | 175  | 173  | 6   | -2  | 3 | 2 | 919  | 878  | 9   | 15  | 5 | 2 | 36    | 4    | 36  | -3  | 9 | 2 | 0    | 42   | 1   | 0   | 2 | 3 | 996  | 968  | 13  |
| -12 | 1 | 2 | 222  | 224  | 5   | -1  | 3 | 2 | 1085 | 1061 | 11  | -16 | 6 | 2 | 59    | 14   | 58  | -2  | 9 | 2 | 194  | 198  | 21  | 1   | 2 | 3 | 236  | 228  | 4   |
| -11 | 1 | 2 | 158  | 165  | 5   | 0   | 3 | 2 | 525  | 504  | 5   | -15 | 6 | 2 | 84    | 78   | 57  | -1  | 9 | 2 | 208  | 209  | 19  | 2   | 2 | 3 | 183  | 180  | 3   |
| -10 | 1 | 2 | 176  | 187  | 4   | 1   | 3 | 2 | 680  | 649  | 7   | -14 | 6 | 2 | 172   | 157  | 20  | 0   | 9 | 2 | 79   | 75   | 37  | 3   | 2 | 3 | 736  | 734  | 8   |
| -9  | 1 | 2 | 475  | 468  | 4   | 2   | 3 | 2 | 628  | 610  | 7   | -13 | 6 | 2 | 98    | 35   | 24  | 1   | 9 | 2 | 148  | 152  | 14  | 4   | 2 | 3 | 563  | 553  | 6   |
| -8  | 1 | 2 | 658  | 657  | 5   | 3   | 3 | 2 | 279  | 258  | 3   | -12 | 6 | 2 | 211   | 210  | 20  | 2   | 9 | 2 | 242  | 252  | 18  | 5   | 2 | 3 | 144  | 136  | 3   |
| -7  | 1 | 2 | 448  | 443  | 5   | 4   | 3 | 2 | 385  | 372  | 4   | -11 | 6 | 2 | 114   | 86   | 16  | 3   | 9 | 2 | 72   | 45   | 72  | 6   | 2 | 3 | 243  | 246  | 3   |
| -6  | 1 | 2 | 213  | 205  | 3   | 5   | 3 | 2 | 361  | 371  | 5   | -10 | 6 | 2 | 167   | 162  | 10  | 4   | 9 | 2 | 130  | 150  | 40  | 7   | 2 | 3 | 396  | 413  | 4   |
| -5  | 1 | 2 | 176  | 166  | 5   | 6   | 3 | 2 | 53   | 33   | 14  | -9  | 6 | 2 | 227   | 206  | 8   | 5   | 9 | 2 | 213  | 183  | 24  | 8   | 2 | 3 | 623  | 622  | 8   |
| -4  | 1 | 2 | 1442 | 1426 | 20  | 7   | 3 | 2 | 536  | 552  | 6   | -8  | 6 | 2 | 268   | 262  | 17  | 6   | 9 | 2 | 163  | 135  | 24  | 9   | 2 | 3 | 435  | 441  | 6   |
| -3  | 1 | 2 | 94   | 68   | 5   | 8   | 3 | 2 | 174  | 174  | 7   | -7  | 6 | 2 | 217   | 222  | 6   | 7   | 9 | 2 | 60   | 72   | 60  | 10  | 2 | 3 | 600  | 589  | 9   |
| -2  | 1 | 2 | 479  | 469  | 5   | 9   | 3 | 2 | 86   | 91   | 8   | -6  | 6 | 2 | 82    | 93   | 7   | -17 | 0 | 3 | 144  | 158  | 20  | 11  | 2 | 3 | 280  | 285  | 5   |
| -1  | 1 | 2 | 84   | 71   | 6   | 10  | 3 | 2 | 121  | 121  | 8   | -5  | 6 | 2 | 308   | 301  | 5   | -15 | 0 | 3 | 47   | 81   | 47  | 12  | 2 | 3 | 235  | 238  | 7   |
| 0   | 1 | 2 | 971  | 979  | 19  | 11  | 3 | 2 | 221  | 234  | 7   | -4  | 6 | 2 | 528   | 521  | 6   | -13 | 0 | 3 | 496  | 490  | 8   | 13  | 2 | 3 | 109  | 112  | 16  |
| 1   | 1 | 2 | 302  | 277  | 5   | 12  | 3 | 2 | 129  | 101  | 13  | -3  | 6 | 2 | 786   | 778  | 8   | -11 | 0 | 3 | 98   | 97   | 8   | 14  | 2 | 3 | 173  | 192  | 11  |
| 2   | 1 | 2 | 861  | 831  | 11  | 13  | 3 | 2 | 57   | 59   | 57  | -2  | 6 | 2 | 140   | 138  | 26  | -9  | 0 | 3 | 105  | 121  | 8   | 15  | 2 | 3 | 53   | 18   | 53  |
| 3   | 1 | 2 | 407  | 404  | 5   | 14  | 3 | 2 | 208  | 204  | 15  | -1  | 6 | 2 | 35    | 18   | 34  | -7  | 0 | 3 | 238  | 236  | 3   | 16  | 2 | 3 | 138  | 145  | 18  |
| 4   | 1 | 2 | 735  | 731  | 8   | 15  | 3 | 2 | 0    | 6    | 1   | 0   | 6 | 2 | 747   | 749  | 9   | -5  | 0 | 3 | 748  | 743  | 11  | 17  | 2 | 3 | 101  | 81   | 36  |
| 5   | 1 | 2 | 715  | 726  | 8   | 16  | 3 | 2 | 67   | 20   | 67  | 1   | 6 | 2 | 240   | 237  | 4   | -3  | 0 | 3 | 216  | 189  | 3   | -19 | 3 | 3 | 224  | 189  | 28  |
| 6   | 1 | 2 | 402  | 410  | 4   | 17  | 3 | 2 | 132  | 39   | 52  | 2   | 6 | 2 | 133   | 131  | 6   | -1  | 0 | 3 | 688  | 1156 | 388 | -18 | 3 | 3 | 97   | 103  | 44  |
| 7   | 1 | 2 | 70   | 62   | 9   | -18 | 4 | 2 | 0    | 61   | 1   | 3   | 6 | 2 | 382   | 376  | 7   | 1   | 0 | 3 | 830  | 827  | 12  | -17 | 3 | 3 | 202  | 184  | 18  |
| 8   | 1 | 2 | 688  | 684  | 8   | -17 | 4 | 2 | 171  | 160  | 35  | 4   | 6 | 2 | 587   | 575  | 6   | 3   | 0 | 3 | 1892 | 1837 | 24  | -16 | 3 | 3 | 48   | 34   | 48  |
| 9   | 1 | 2 | 64   | 69   | 9   | -16 | 4 | 2 | 0    | 49   | 1   | 5   | 6 | 2 | 324   | 328  | 4   | 5   | 0 | 3 | 657  | 612  | 10  | -15 | 3 | 3 | 186  | 194  | 19  |
| 10  | 1 | 2 | 58   | 54   | 25  | -15 | 4 | 2 | 0    | 48   | 1   | 6   | 6 | 2 | 266   | 262  | 4   | 7   | 0 | 3 | 226  | 217  | 5   | -14 | 3 | 3 | 190  | 198  | 10  |
| 11  | 1 | 2 | 44   | 22   | 17  | -14 | 4 | 2 | 138  | 101  | 19  | 7   | 6 | 2 | 353   | 357  | 6   | 9   | 0 | 3 | 378  | 366  | 10  | -13 | 3 | 3 | 0    | 8    | 1   |
| 12  | 1 | 2 | 70   | 56   | 12  | -13 | 4 | 2 | 44   | 89   | 44  | 8   | 6 | 2 | 144</ |      |     |     |   |   |      |      |     |     |   |   |      |      |     |

Table 7. Observed and calculated structure factors for 3a  
Page 3

| h   | k | l | 10Fo | 10Fc | 10s | h   | k | l | 10Fo | 10Fc | 10s | h   | k | l | 10Fo | 10Fc | 10s | h   | k | l | 10Fo | 10Fc | 10s | h   | k | l | 10Fo | 10Fc | 10s |
|-----|---|---|------|------|-----|-----|---|---|------|------|-----|-----|---|---|------|------|-----|-----|---|---|------|------|-----|-----|---|---|------|------|-----|
| 17  | 3 | 3 | 0    | 64   | 1   | 2   | 6 | 3 | 532  | 531  | 7   | 2   | 0 | 4 | 647  | 645  | 7   | -16 | 3 | 4 | 34   | 28   | 33  | 2   | 5 | 4 | 621  | 621  | 7   |
| -18 | 4 | 3 | 64   | 29   | 63  | 3   | 6 | 3 | 91   | 85   | 20  | 4   | 0 | 4 | 2295 | 2151 | 33  | -15 | 3 | 4 | 91   | 85   | 50  | 3   | 5 | 4 | 167  | 165  | 6   |
| -17 | 4 | 3 | 117  | 73   | 29  | 4   | 6 | 3 | 83   | 90   | 11  | 6   | 0 | 4 | 831  | 793  | 11  | -14 | 3 | 4 | 86   | 84   | 40  | 4   | 5 | 4 | 100  | 87   | 20  |
| -16 | 4 | 3 | 198  | 170  | 14  | 5   | 6 | 3 | 376  | 393  | 5   | 8   | 0 | 4 | 213  | 232  | 7   | -13 | 3 | 4 | 298  | 300  | 14  | 5   | 5 | 4 | 172  | 186  | 14  |
| -15 | 4 | 3 | 88   | 130  | 33  | 6   | 6 | 3 | 20   | 30   | 20  | 10  | 0 | 4 | 96   | 52   | 26  | -12 | 3 | 4 | 306  | 308  | 9   | 6   | 5 | 4 | 107  | 83   | 38  |
| -14 | 4 | 3 | 107  | 66   | 107 | 7   | 6 | 3 | 322  | 330  | 8   | 12  | 0 | 4 | 138  | 151  | 22  | -11 | 3 | 4 | 66   | 68   | 7   | 7   | 5 | 4 | 117  | 122  | 20  |
| -13 | 4 | 3 | 225  | 203  | 10  | 8   | 6 | 3 | 148  | 139  | 10  | 14  | 0 | 4 | 0    | 38   | 1   | -10 | 3 | 4 | 322  | 320  | 7   | 8   | 5 | 4 | 115  | 111  | 39  |
| -12 | 4 | 3 | 233  | 227  | 9   | 9   | 6 | 3 | 156  | 151  | 10  | 16  | 0 | 4 | 0    | 33   | 1   | -9  | 3 | 4 | 207  | 225  | 5   | 9   | 5 | 4 | 40   | 13   | 39  |
| -11 | 4 | 3 | 106  | 82   | 14  | 10  | 6 | 3 | 125  | 123  | 11  | -20 | 1 | 4 | 34   | 7    | 34  | -8  | 3 | 4 | 135  | 134  | 8   | 10  | 5 | 4 | 231  | 212  | 10  |
| -10 | 4 | 3 | 50   | 87   | 50  | 11  | 6 | 3 | 90   | 99   | 38  | -19 | 1 | 4 | 254  | 210  | 20  | -7  | 3 | 4 | 779  | 778  | 10  | 11  | 5 | 4 | 156  | 151  | 26  |
| -9  | 4 | 3 | 204  | 218  | 5   | 12  | 6 | 3 | 99   | 92   | 99  | -18 | 1 | 4 | 0    | 67   | 1   | -6  | 3 | 4 | 164  | 156  | 3   | 12  | 5 | 4 | 78   | 49   | 78  |
| -8  | 4 | 3 | 252  | 256  | 9   | 13  | 6 | 3 | 0    | 27   | 1   | -17 | 1 | 4 | 133  | 148  | 12  | -5  | 3 | 4 | 596  | 576  | 10  | 13  | 5 | 4 | 0    | 25   | 1   |
| -7  | 4 | 3 | 399  | 395  | 5   | 14  | 6 | 3 | 57   | 33   | 56  | -16 | 1 | 4 | 92   | 86   | 20  | -4  | 3 | 4 | 170  | 152  | 7   | 14  | 5 | 4 | 179  | 178  | 24  |
| -6  | 4 | 3 | 146  | 134  | 4   | -14 | 7 | 3 | 180  | 167  | 16  | -15 | 1 | 4 | 428  | 423  | 9   | -3  | 3 | 4 | 642  | 629  | 6   | -16 | 6 | 4 | 0    | 46   | 1   |
| -5  | 4 | 3 | 610  | 619  | 8   | -13 | 7 | 3 | 91   | 89   | 29  | -14 | 1 | 4 | 372  | 373  | 7   | -2  | 3 | 4 | 183  | 162  | 3   | -15 | 6 | 4 | 158  | 141  | 22  |
| -4  | 4 | 3 | 57   | 60   | 5   | -12 | 7 | 3 | 195  | 197  | 26  | -13 | 1 | 4 | 248  | 247  | 6   | -1  | 3 | 4 | 394  | 411  | 4   | -14 | 6 | 4 | 147  | 161  | 21  |
| -3  | 4 | 3 | 291  | 281  | 3   | -11 | 7 | 3 | 68   | 77   | 41  | -12 | 1 | 4 | 0    | 22   | 1   | 0   | 3 | 4 | 254  | 251  | 4   | -13 | 6 | 4 | 38   | 59   | 38  |
| -2  | 4 | 3 | 357  | 359  | 4   | -10 | 7 | 3 | 124  | 88   | 18  | -11 | 1 | 4 | 146  | 147  | 5   | 1   | 3 | 4 | 167  | 178  | 6   | -12 | 6 | 4 | 16   | 77   | 15  |
| -1  | 4 | 3 | 863  | 850  | 8   | -9  | 7 | 3 | 139  | 120  | 16  | -10 | 1 | 4 | 639  | 635  | 6   | 2   | 3 | 4 | 65   | 42   | 7   | -11 | 6 | 4 | 191  | 187  | 10  |
| 0   | 4 | 3 | 88   | 75   | 11  | -8  | 7 | 3 | 153  | 166  | 12  | -9  | 1 | 4 | 224  | 221  | 4   | 3   | 3 | 4 | 164  | 174  | 6   | -10 | 6 | 4 | 70   | 78   | 27  |
| 1   | 4 | 3 | 487  | 477  | 5   | -7  | 7 | 3 | 78   | 71   | 26  | -8  | 1 | 4 | 369  | 344  | 4   | 4   | 3 | 4 | 721  | 735  | 9   | -9  | 6 | 4 | 192  | 178  | 17  |
| 2   | 4 | 3 | 981  | 948  | 10  | -6  | 7 | 3 | 137  | 128  | 12  | -7  | 1 | 4 | 389  | 395  | 3   | 5   | 3 | 4 | 747  | 741  | 9   | -8  | 6 | 4 | 0    | 35   | 1   |
| 3   | 4 | 3 | 134  | 135  | 5   | -5  | 7 | 3 | 130  | 116  | 9   | -6  | 1 | 4 | 762  | 771  | 8   | 6   | 3 | 4 | 94   | 100  | 12  | -7  | 6 | 4 | 35   | 52   | 34  |
| 4   | 4 | 3 | 44   | 40   | 20  | -4  | 7 | 3 | 171  | 166  | 6   | -5  | 1 | 4 | 222  | 252  | 5   | 7   | 3 | 4 | 103  | 98   | 16  | -6  | 6 | 4 | 572  | 567  | 7   |
| 5   | 4 | 3 | 694  | 701  | 10  | -3  | 7 | 3 | 150  | 171  | 9   | -4  | 1 | 4 | 1251 | 1270 | 20  | 8   | 3 | 4 | 717  | 715  | 11  | -5  | 6 | 4 | 364  | 356  | 8   |
| 6   | 4 | 3 | 138  | 144  | 6   | -2  | 7 | 3 | 353  | 350  | 5   | -3  | 1 | 4 | 614  | 633  | 9   | 9   | 3 | 4 | 314  | 309  | 5   | -4  | 6 | 4 | 90   | 86   | 17  |
| 7   | 4 | 3 | 57   | 61   | 29  | -1  | 7 | 3 | 237  | 224  | 9   | -2  | 1 | 4 | 1054 | 1027 | 10  | 10  | 3 | 4 | 90   | 80   | 12  | -3  | 6 | 4 | 219  | 225  | 4   |
| 8   | 4 | 3 | 66   | 72   | 22  | 0   | 7 | 3 | 512  | 503  | 7   | -1  | 1 | 4 | 1598 | 1604 | 20  | 11  | 3 | 4 | 265  | 263  | 9   | -2  | 6 | 4 | 1028 | 1004 | 12  |
| 9   | 4 | 3 | 252  | 262  | 7   | 1   | 7 | 3 | 193  | 201  | 5   | 0   | 1 | 4 | 406  | 395  | 4   | 12  | 3 | 4 | 23   | 8    | 22  | -1  | 6 | 4 | 40   | 18   | 28  |
| 10  | 4 | 3 | 0    | 14   | 1   | 2   | 7 | 3 | 120  | 113  | 8   | 1   | 1 | 4 | 117  | 124  | 3   | 13  | 3 | 4 | 135  | 149  | 18  | 0   | 6 | 4 | 308  | 300  | 6   |
| 11  | 4 | 3 | 125  | 128  | 31  | 3   | 7 | 3 | 90   | 93   | 11  | 2   | 1 | 4 | 622  | 603  | 5   | 14  | 3 | 4 | 267  | 256  | 28  | 1   | 6 | 4 | 104  | 103  | 13  |
| 12  | 4 | 3 | 179  | 125  | 20  | 4   | 7 | 3 | 388  | 385  | 8   | 3   | 1 | 4 | 138  | 158  | 3   | 15  | 3 | 4 | 0    | 58   | 1   | 2   | 6 | 4 | 158  | 168  | 5   |
| 13  | 4 | 3 | 0    | 58   | 1   | 5   | 7 | 3 | 137  | 134  | 8   | 4   | 1 | 4 | 405  | 417  | 5   | 16  | 3 | 4 | 0    | 35   | 1   | 3   | 6 | 4 | 84   | 100  | 35  |
| 14  | 4 | 3 | 136  | 47   | 31  | 6   | 7 | 3 | 60   | 69   | 30  | 5   | 1 | 4 | 76   | 85   | 6   | -18 | 4 | 4 | 87   | 110  | 49  | 4   | 6 | 4 | 251  | 261  | 9   |
| 15  | 4 | 3 | 124  | 54   | 40  | 7   | 7 | 3 | 0    | 37   | 1   | 6   | 1 | 4 | 494  | 492  | 5   | -17 | 4 | 4 | 145  | 138  | 16  | 5   | 6 | 4 | 0    | 4    | 1   |
| 16  | 4 | 3 | 241  | 234  | 22  | 8   | 7 | 3 | 0    | 23   | 1   | 7   | 1 | 4 | 648  | 635  | 7   | -16 | 4 | 4 | 134  | 128  | 19  | 6   | 6 | 4 | 50   | 69   | 38  |
| -17 | 5 | 3 | 0    | 19   | 1   | 9   | 7 | 3 | 103  | 34   | 17  | 8   | 1 | 4 | 318  | 309  | 5   | -15 | 4 | 4 | 115  | 135  | 16  | 7   | 6 | 4 | 252  | 268  | 7   |
| -16 | 5 | 3 | 52   | 32   | 51  | 10  | 7 | 3 | 70   | 28   | 44  | 9   | 1 | 4 | 42   | 20   | 15  | -14 | 4 | 4 | 166  | 149  | 13  | 8   | 6 | 4 | 151  | 144  | 12  |
| -15 | 5 | 3 | 0    | 19   | 1   | 11  | 7 | 3 | 0    | 49   | 1   | 10  | 1 | 4 | 127  | 145  | 12  | -13 | 4 | 4 | 73   | 134  | 29  | 9   | 6 | 4 | 53   | 56   | 53  |
| -14 | 5 | 3 | 184  | 171  | 15  | 12  | 7 | 3 | 228  | 195  | 16  | 11  | 1 | 4 | 239  | 208  | 22  | -12 | 4 | 4 | 354  | 333  | 8   | 10  | 6 | 4 | 131  | 142  | 20  |
| -13 | 5 | 3 | 72   | 118  | 25  | -12 | 8 | 3 | 172  | 144  | 22  | 12  | 1 | 4 | 100  | 101  | 16  | -11 | 4 | 4 | 408  | 417  | 15  | 11  | 6 | 4 | 0    | 46   | 1   |
| -12 | 5 | 3 | 93   | 83   | 35  | -11 | 8 | 3 | 143  | 128  | 20  | 13  | 1 | 4 | 81   | 97   | 30  | -10 | 4 | 4 | 157  | 180  | 9   | 13  | 6 | 4 | 77   | 63   | 77  |
| -11 | 5 | 3 | 195  | 213  | 9   | -10 | 8 | 3 | 211  | 214  | 27  | 14  | 1 | 4 | 46   | 68   | 45  | -9  | 4 | 4 | 233  | 236  | 11  | -14 | 7 | 4 | 103  | 63   | 30  |
| -10 | 5 | 3 | 191  | 187  | 7   | -9  | 8 | 3 | 0    | 3    | 1   | 15  | 1 | 4 | 158  | 133  | 16  | -8  | 4 | 4 | 610  | 623  | 8   | -13 | 7 | 4 | 243  | 236  | 15  |
| -9  | 5 | 3 | 446  | 435  | 8   | -8  | 8 | 3 | 0    | 17   | 1   | 16  | 1 | 4 | 0    | 51   | 1   | -7  | 4 | 4 | 270  | 268  | 5   | -12 | 7 | 4 | 202  | 208  | 16  |
| -8  | 5 | 3 | 353  | 357  | 3   | -7  | 8 | 3 | 142  | 136  | 15  | 17  | 1 | 4 | 27   | 65   | 27  | -6  | 4 | 4 | 382  | 385  | 7   | -11 | 7 | 4 | 287  | 267  | 15  |
| -7  | 5 | 3 | 69   | 65   | 10  | -6  | 8 | 3 | 85   | 36   | 29  | -20 | 2 | 4 | 172  | 21   | 39  | -5  | 4 | 4 | 127  | 131  | 5   | -10 | 7 | 4 | 12   | 40   | 11  |
| -6  | 5 | 3 | 37   | 21   | 17  | -5  | 8 | 3 | 95   | 101  | 32  | -19 | 2 | 4 | 0    | 38   | 1   | -4  | 4 | 4 | 33   | 18   | 26  | -9  | 7 | 4 | 381  | 387  | 10  |
| -5  | 5 | 3 | 1021 | 1008 | 10  | -4  | 8 | 3 | 194  | 194  | 11  | -18 | 2 | 4 | 48   | 55   | 48  | -3  | 4 | 4 | 57   | 29   | 10  | -8  | 7 | 4 | 63   | 56   | 63  |
| -4  | 5 | 3 | 293  | 284  | 4   | -3  | 8 | 3 | 103  | 103  | 14  | -17 | 2 | 4 | 222  | 203  | 12  | -2  | 4 | 4 | 573  | 577  | 5   | -7  | 7 | 4 | 385  | 381  | 11  |
| -3  | 5 | 3 | 322  | 330  | 5   | -2  | 8 | 3 | 332  | 348  | 7   | -16 | 2 | 4 | 128  | 131  | 17  | -1  | 4 | 4 | 136  | 145  | 3   | -6  | 7 | 4 | 75   | 31   | 58  |
| -2  | 5 | 3 | 75   | 74   | 8   | -1  | 8 | 3 | 161  | 168  | 9   | -15 | 2 | 4 | 76   | 69   | 30  | 0   | 4 | 4 | 770  | 765  | 8   | -5  | 7 | 4 | 77   | 76   | 15  |
| -1  | 5 | 3 | 71   | 78   | 9   | 0   | 8 | 3 | 174  | 188  | 10  | -14 | 2 | 4 | 103  | 79   | 16  | 1   | 4 | 4 | 224  | 216  | 8   | -4  | 7 | 4 | 156  | 168  | 12  |
| 0   | 5 | 3 | 149  | 140  | 4   | 1   | 8 | 3 | 28   | 47   | 27  | -13 | 2 | 4 | 185  | 195  | 5   | 2   | 4 | 4 | 66   | 50   | 12  | -3  | 7 | 4 | 100  | 112  | 15  |
| 1   | 5 | 3 | 108  | 81   | 8   | 2   | 8 | 3 | 348  | 344  | 7   | -12 | 2 | 4 | 151  | 160  | 5   | 3   | 4 | 4 | 442  | 445  | 4   | -2  | 7 | 4 | 0    | 50   | 1   |
| 2   | 5 | 3 | 145  | 129  | 4   | 3   | 8 | 3 | 25   | 64   | 24  | -11 | 2 | 4 | 178  | 179  | 4   | 4   | 4 | 4 | 583  | 585  | 7   | -1  | 7 | 4 | 187  | 184  | 22  |
| 3   | 5 | 3 | 704  | 680  | 8   | 4   | 8 | 3 | 214  | 218  | 9   | -10 | 2 | 4 | 35   | 31   | 34  | 5   | 4 | 4 | 120  | 127  | 6   | 0   | 7 | 4 | 16   | 19   | 16  |
| 4   | 5 | 3 | 93   | 84   | 9   | 6   | 8 | 3 | 179  | 145  | 25  | -9  | 2 | 4 | 576  | 572  | 5   | 6   | 4 | 4 | 111  | 104  | 8   | 1   | 7 | 4 | 312  | 315  | 5   |
| 5   | 5 | 3 | 24   | 14   | 23  | 7   | 8 | 3 | 106  | 99   | 46  | -8  | 2 | 4 | 142  | 136  | 7   |     |   |   |      |      |     |     |   |   |      |      |     |

Table 7. Observed and calculated structure factors for 3a  
Page 4

| h   | k | l | 10Fo | 10Fc | 10s | h   | k | l | 10Fo | 10Fc | 10s | h   | k | l | 10Fo | 10Fc | 10s | h   | k | l | 10Fo | 10Fc | 10s | h   | k | l | 10Fo | 10Fc | 10s |
|-----|---|---|------|------|-----|-----|---|---|------|------|-----|-----|---|---|------|------|-----|-----|---|---|------|------|-----|-----|---|---|------|------|-----|
| 7   | 8 | 4 | 159  | 185  | 33  | -6  | 2 | 5 | 389  | 408  | 9   | 9   | 4 | 5 | 0    | 40   | 1   | 6   | 7 | 5 | 186  | 172  | 9   | 8   | 1 | 6 | 362  | 360  | 8   |
| 8   | 8 | 4 | 109  | 4    | 68  | -5  | 2 | 5 | 603  | 586  | 6   | 10  | 4 | 5 | 138  | 109  | 19  | 7   | 7 | 5 | 0    | 30   | 1   | 9   | 1 | 6 | 189  | 176  | 12  |
| 9   | 8 | 4 | 101  | 90   | 101 | -4  | 2 | 5 | 985  | 970  | 9   | 11  | 4 | 5 | 129  | 124  | 19  | 8   | 7 | 5 | 0    | 5    | 1   | 10  | 1 | 6 | 0    | 16   | 1   |
| -8  | 9 | 4 | 72   | 129  | 71  | -3  | 2 | 5 | 37   | 41   | 5   | 12  | 4 | 5 | 216  | 197  | 22  | 9   | 7 | 5 | 59   | 35   | 58  | 11  | 1 | 6 | 294  | 288  | 10  |
| -7  | 9 | 4 | 74   | 46   | 38  | -2  | 2 | 5 | 356  | 356  | 4   | 14  | 4 | 5 | 79   | 52   | 78  | 10  | 7 | 5 | 77   | 78   | 38  | 12  | 1 | 6 | 65   | 43   | 30  |
| -6  | 9 | 4 | 0    | 59   | 1   | -1  | 2 | 5 | 31   | 48   | 20  | 15  | 4 | 5 | 143  | 119  | 43  | 11  | 7 | 5 | 69   | 17   | 69  | 13  | 1 | 6 | 98   | 87   | 30  |
| -5  | 9 | 4 | 95   | 30   | 32  | 0   | 2 | 5 | 65   | 67   | 7   | -18 | 5 | 5 | 113  | 93   | 63  | -12 | 8 | 5 | 169  | 138  | 20  | 14  | 1 | 6 | 113  | 55   | 32  |
| -4  | 9 | 4 | 358  | 364  | 11  | 1   | 2 | 5 | 746  | 731  | 8   | -17 | 5 | 5 | 65   | 62   | 64  | -11 | 8 | 5 | 0    | 35   | 1   | 15  | 1 | 6 | 0    | 5    | 1   |
| -3  | 9 | 4 | 0    | 61   | 1   | 2   | 2 | 5 | 656  | 682  | 6   | -16 | 5 | 5 | 57   | 93   | 56  | -10 | 8 | 5 | 92   | 121  | 81  | 16  | 1 | 6 | 85   | 60   | 49  |
| -2  | 9 | 4 | 186  | 178  | 24  | 3   | 2 | 5 | 206  | 214  | 4   | -15 | 5 | 5 | 170  | 151  | 16  | -9  | 8 | 5 | 66   | 42   | 38  | -20 | 2 | 6 | 67   | 88   | 66  |
| -1  | 9 | 4 | 126  | 128  | 31  | 4   | 2 | 5 | 137  | 141  | 4   | -14 | 5 | 5 | 104  | 72   | 51  | -8  | 8 | 5 | 171  | 161  | 31  | -19 | 2 | 6 | 45   | 37   | 45  |
| 0   | 9 | 4 | 238  | 263  | 21  | 5   | 2 | 5 | 465  | 472  | 4   | -13 | 5 | 5 | 75   | 79   | 41  | -7  | 8 | 5 | 127  | 107  | 24  | -18 | 2 | 6 | 153  | 156  | 17  |
| 1   | 9 | 4 | 0    | 6    | 1   | 6   | 2 | 5 | 658  | 652  | 8   | -12 | 5 | 5 | 47   | 66   | 47  | -6  | 8 | 5 | 141  | 169  | 11  | -17 | 2 | 6 | 214  | 223  | 10  |
| 2   | 9 | 4 | 294  | 322  | 14  | 7   | 2 | 5 | 188  | 190  | 5   | -11 | 5 | 5 | 269  | 240  | 11  | -5  | 8 | 5 | 251  | 254  | 12  | -16 | 2 | 6 | 0    | 27   | 1   |
| 3   | 9 | 4 | 159  | 119  | 26  | 8   | 2 | 5 | 237  | 230  | 4   | -10 | 5 | 5 | 66   | 71   | 65  | -4  | 8 | 5 | 327  | 324  | 9   | -15 | 2 | 6 | 116  | 123  | 10  |
| 4   | 9 | 4 | 89   | 56   | 89  | 9   | 2 | 5 | 170  | 180  | 5   | -9  | 5 | 5 | 269  | 271  | 6   | -3  | 8 | 5 | 0    | 8    | 1   | -14 | 2 | 6 | 273  | 294  | 5   |
| 5   | 9 | 4 | 127  | 122  | 29  | 10  | 2 | 5 | 183  | 181  | 13  | -8  | 5 | 5 | 113  | 107  | 11  | -2  | 8 | 5 | 104  | 96   | 18  | -13 | 2 | 6 | 139  | 141  | 6   |
| 6   | 9 | 4 | 0    | 43   | 1   | 11  | 2 | 5 | 132  | 131  | 14  | -7  | 5 | 5 | 210  | 213  | 5   | -1  | 8 | 5 | 206  | 207  | 14  | -12 | 2 | 6 | 457  | 454  | 5   |
| -17 | 0 | 5 | 65   | 94   | 29  | 12  | 2 | 5 | 45   | 61   | 44  | -6  | 5 | 5 | 134  | 129  | 4   | 0   | 8 | 5 | 213  | 209  | 9   | -11 | 2 | 6 | 378  | 387  | 4   |
| -15 | 0 | 5 | 164  | 175  | 8   | 13  | 2 | 5 | 54   | 42   | 54  | -5  | 5 | 5 | 315  | 318  | 7   | 1   | 8 | 5 | 171  | 165  | 10  | -10 | 2 | 6 | 88   | 79   | 6   |
| -13 | 0 | 5 | 178  | 197  | 11  | 14  | 2 | 5 | 80   | 70   | 42  | -4  | 5 | 5 | 312  | 326  | 8   | 2   | 8 | 5 | 216  | 220  | 9   | -9  | 2 | 6 | 586  | 604  | 23  |
| -11 | 0 | 5 | 789  | 772  | 11  | 15  | 2 | 5 | 0    | 34   | 1   | -3  | 5 | 5 | 568  | 574  | 6   | 3   | 8 | 5 | 120  | 127  | 12  | -8  | 2 | 6 | 350  | 353  | 8   |
| -9  | 0 | 5 | 102  | 105  | 9   | 16  | 2 | 5 | 84   | 13   | 68  | -2  | 5 | 5 | 94   | 79   | 7   | 4   | 8 | 5 | 116  | 120  | 18  | -7  | 2 | 6 | 683  | 676  | 6   |
| -7  | 0 | 5 | 1538 | 1542 | 20  | -19 | 3 | 5 | 252  | 235  | 18  | -1  | 5 | 5 | 438  | 448  | 7   | 5   | 8 | 5 | 163  | 150  | 163 | -6  | 2 | 6 | 218  | 218  | 4   |
| -5  | 0 | 5 | 429  | 454  | 14  | -18 | 3 | 5 | 70   | 70   | 62  | 0   | 5 | 5 | 277  | 279  | 5   | 6   | 8 | 5 | 89   | 41   | 48  | -5  | 2 | 6 | 1220 | 1235 | 11  |
| -3  | 0 | 5 | 2092 | 2061 | 36  | -17 | 3 | 5 | 60   | 115  | 59  | 1   | 5 | 5 | 608  | 614  | 9   | 7   | 8 | 5 | 128  | 116  | 31  | -4  | 2 | 6 | 216  | 225  | 5   |
| -1  | 0 | 5 | 3916 | 3785 | 126 | -16 | 3 | 5 | 71   | 36   | 28  | 2   | 5 | 5 | 204  | 208  | 10  | 8   | 8 | 5 | 121  | 149  | 44  | -3  | 2 | 6 | 198  | 186  | 2   |
| 1   | 0 | 5 | 855  | 813  | 9   | -15 | 3 | 5 | 0    | 12   | 1   | 3   | 5 | 5 | 586  | 575  | 19  | -8  | 9 | 5 | 228  | 221  | 15  | -2  | 2 | 6 | 664  | 644  | 7   |
| 3   | 0 | 5 | 507  | 510  | 6   | -14 | 3 | 5 | 147  | 120  | 29  | 4   | 5 | 5 | 45   | 29   | 31  | -7  | 9 | 5 | 54   | 95   | 54  | -1  | 2 | 6 | 526  | 527  | 5   |
| 5   | 0 | 5 | 752  | 709  | 10  | -13 | 3 | 5 | 431  | 410  | 9   | 5   | 5 | 5 | 318  | 334  | 7   | -6  | 9 | 5 | 0    | 5    | 1   | 0   | 2 | 6 | 0    | 18   | 1   |
| 7   | 0 | 5 | 177  | 185  | 7   | -12 | 3 | 5 | 469  | 481  | 12  | 6   | 5 | 5 | 125  | 111  | 14  | -5  | 9 | 5 | 75   | 95   | 59  | 1   | 2 | 6 | 418  | 417  | 4   |
| 9   | 0 | 5 | 341  | 350  | 13  | -11 | 3 | 5 | 28   | 44   | 27  | 7   | 5 | 5 | 478  | 489  | 10  | -4  | 9 | 5 | 60   | 18   | 59  | 2   | 2 | 6 | 695  | 675  | 6   |
| 11  | 0 | 5 | 108  | 105  | 16  | -10 | 3 | 5 | 0    | 22   | 1   | 8   | 5 | 5 | 89   | 59   | 25  | -3  | 9 | 5 | 210  | 213  | 13  | 3   | 2 | 6 | 326  | 339  | 4   |
| 13  | 0 | 5 | 132  | 15   | 25  | -9  | 3 | 5 | 109  | 129  | 7   | 9   | 5 | 5 | 70   | 80   | 70  | -2  | 9 | 5 | 0    | 20   | 1   | 4   | 2 | 6 | 247  | 252  | 3   |
| 15  | 0 | 5 | 127  | 142  | 25  | -8  | 3 | 5 | 646  | 655  | 7   | 10  | 5 | 5 | 74   | 17   | 29  | -1  | 9 | 5 | 84   | 51   | 48  | 5   | 2 | 6 | 230  | 237  | 4   |
| -20 | 1 | 5 | 13   | 89   | 13  | -7  | 3 | 5 | 97   | 100  | 6   | 11  | 5 | 5 | 85   | 6    | 85  | 0   | 9 | 5 | 54   | 74   | 53  | 6   | 2 | 6 | 185  | 188  | 5   |
| -19 | 1 | 5 | 47   | 69   | 46  | -6  | 3 | 5 | 779  | 777  | 10  | 13  | 5 | 5 | 60   | 24   | 60  | 1   | 9 | 5 | 233  | 232  | 12  | 7   | 2 | 6 | 608  | 590  | 8   |
| -18 | 1 | 5 | 87   | 130  | 39  | -5  | 3 | 5 | 735  | 714  | 6   | 14  | 5 | 5 | 120  | 111  | 42  | 2   | 9 | 5 | 0    | 9    | 1   | 8   | 2 | 6 | 103  | 100  | 6   |
| -17 | 1 | 5 | 129  | 123  | 11  | -4  | 3 | 5 | 99   | 96   | 6   | -16 | 6 | 5 | 109  | 73   | 109 | 3   | 9 | 5 | 220  | 243  | 20  | 9   | 2 | 6 | 124  | 143  | 16  |
| -16 | 1 | 5 | 142  | 144  | 29  | -3  | 3 | 5 | 663  | 656  | 7   | -15 | 6 | 5 | 83   | 87   | 41  | 4   | 9 | 5 | 43   | 51   | 42  | 10  | 2 | 6 | 0    | 44   | 1   |
| -15 | 1 | 5 | 205  | 211  | 12  | -2  | 3 | 5 | 777  | 777  | 9   | -14 | 6 | 5 | 101  | 91   | 32  | 5   | 9 | 5 | 93   | 101  | 92  | 11  | 2 | 6 | 358  | 338  | 22  |
| -14 | 1 | 5 | 634  | 618  | 10  | -1  | 3 | 5 | 85   | 90   | 7   | -13 | 6 | 5 | 377  | 375  | 13  | -18 | 0 | 6 | 354  | 358  | 13  | 12  | 2 | 6 | 337  | 333  | 9   |
| -13 | 1 | 5 | 16   | 29   | 15  | 0   | 3 | 5 | 245  | 251  | 3   | -12 | 6 | 5 | 36   | 11   | 35  | -16 | 0 | 6 | 353  | 375  | 9   | 13  | 2 | 6 | 177  | 144  | 16  |
| -12 | 1 | 5 | 66   | 69   | 11  | 1   | 3 | 5 | 439  | 425  | 4   | -11 | 6 | 5 | 107  | 118  | 23  | -14 | 0 | 6 | 448  | 451  | 13  | 14  | 2 | 6 | 0    | 54   | 1   |
| -11 | 1 | 5 | 418  | 421  | 4   | 2   | 3 | 5 | 478  | 467  | 6   | -10 | 6 | 5 | 162  | 143  | 16  | -12 | 0 | 6 | 167  | 169  | 6   | 15  | 2 | 6 | 60   | 96   | 59  |
| -10 | 1 | 5 | 437  | 430  | 4   | 3   | 3 | 5 | 93   | 80   | 6   | -9  | 6 | 5 | 398  | 395  | 8   | -10 | 0 | 6 | 109  | 147  | 15  | 16  | 2 | 6 | 71   | 87   | 71  |
| -9  | 1 | 5 | 528  | 517  | 4   | 4   | 3 | 5 | 637  | 618  | 7   | -8  | 6 | 5 | 221  | 225  | 10  | -8  | 0 | 6 | 779  | 767  | 9   | -19 | 3 | 6 | 97   | 62   | 62  |
| -8  | 1 | 5 | 561  | 550  | 4   | 5   | 3 | 5 | 255  | 260  | 5   | -7  | 6 | 5 | 93   | 96   | 12  | -6  | 0 | 6 | 1133 | 1132 | 12  | -18 | 3 | 6 | 65   | 64   | 65  |
| -7  | 1 | 5 | 146  | 144  | 3   | 6   | 3 | 5 | 252  | 256  | 6   | -6  | 6 | 5 | 95   | 74   | 15  | -4  | 0 | 6 | 296  | 280  | 5   | -17 | 3 | 6 | 167  | 147  | 14  |
| -6  | 1 | 5 | 327  | 318  | 3   | 7   | 3 | 5 | 212  | 213  | 7   | -5  | 6 | 5 | 90   | 69   | 10  | -2  | 0 | 6 | 1502 | 1462 | 15  | -16 | 3 | 6 | 126  | 111  | 13  |
| -5  | 1 | 5 | 942  | 965  | 22  | 8   | 3 | 5 | 24   | 93   | 24  | -4  | 6 | 5 | 210  | 209  | 6   | 0   | 0 | 6 | 162  | 121  | 7   | -15 | 3 | 6 | 273  | 283  | 8   |
| -4  | 1 | 5 | 292  | 301  | 5   | 9   | 3 | 5 | 369  | 362  | 6   | -3  | 6 | 5 | 133  | 136  | 7   | 2   | 0 | 6 | 387  | 404  | 5   | -14 | 3 | 6 | 0    | 16   | 1   |
| -3  | 1 | 5 | 657  | 624  | 8   | 10  | 3 | 5 | 216  | 236  | 10  | -2  | 6 | 5 | 59   | 57   | 12  | 4   | 0 | 6 | 784  | 802  | 19  | -13 | 3 | 6 | 323  | 328  | 11  |
| -2  | 1 | 5 | 94   | 97   | 3   | 11  | 3 | 5 | 207  | 221  | 16  | -1  | 6 | 5 | 400  | 407  | 5   | 6   | 0 | 6 | 68   | 35   | 54  | -12 | 3 | 6 | 349  | 350  | 7   |
| -1  | 1 | 5 | 1253 | 1242 | 12  | 12  | 3 | 5 | 49   | 99   | 48  | 0   | 6 | 5 | 379  | 373  | 5   | 8   | 0 | 6 | 124  | 149  | 17  | -11 | 3 | 6 | 56   | 37   | 18  |
| 0   | 1 | 5 | 1168 | 1188 | 13  | 13  | 3 | 5 | 196  | 174  | 15  | 1   | 6 | 5 | 0    | 27   | 1   | 10  | 0 | 6 | 0    | 38   | 1   | -10 | 3 | 6 | 264  | 266  | 5   |
| 1   | 1 | 5 | 443  | 463  | 3   | 14  | 3 | 5 | 0    | 22   | 1   | 2   | 6 | 5 | 83   | 84   | 9   | 12  | 0 | 6 | 178  | 163  | 21  | -9  | 3 | 6 | 358  | 370  | 12  |
| 2   | 1 | 5 | 234  | 233  | 2   | 15  | 3 | 5 | 150  | 120  | 37  | 3   | 6 | 5 | 331  | 330  | 10  | 14  | 0 | 6 | 98   | 42   | 32  | -8  | 3 | 6 | 136  | 140  | 7   |
| 3   | 1 | 5 | 669  | 660  | 10  | 16  | 3 | 5 | 61   | 51   | 60  | 4   | 6 | 5 | 68   | 23   |     |     |   |   |      |      |     |     |   |   |      |      |     |

Table 7. Observed and calculated structure factors for 3a  
Page 5

| h   | k | l | 10Fo | 10Fc | 10s | h   | k | l | 10Fo | 10Fc | 10s | h   | k | l | 10Fo | 10Fc | 10s | h   | k | l | 10Fo | 10Fc | 10s | h   | k | l | 10Fo | 10Fc | 10s |
|-----|---|---|------|------|-----|-----|---|---|------|------|-----|-----|---|---|------|------|-----|-----|---|---|------|------|-----|-----|---|---|------|------|-----|
| -13 | 4 | 6 | 194  | 203  | 10  | 11  | 6 | 6 | 0    | 26   | 1   | -11 | 1 | 7 | 655  | 660  | 6   | 3   | 3 | 7 | 399  | 421  | 5   | -8  | 6 | 7 | 65   | 15   | 42  |
| -12 | 4 | 6 | 136  | 149  | 15  | 12  | 6 | 6 | 130  | 81   | 32  | -10 | 1 | 7 | 19   | 24   | 18  | 4   | 3 | 7 | 316  | 325  | 7   | -7  | 6 | 7 | 405  | 405  | 10  |
| -11 | 4 | 6 | 439  | 434  | 15  | -14 | 7 | 6 | 58   | 58   | 57  | -9  | 1 | 7 | 274  | 282  | 3   | 5   | 3 | 7 | 307  | 301  | 8   | -6  | 6 | 7 | 249  | 247  | 6   |
| -10 | 4 | 6 | 82   | 76   | 18  | -13 | 7 | 6 | 187  | 176  | 14  | -8  | 1 | 7 | 233  | 245  | 3   | 6   | 3 | 7 | 350  | 341  | 11  | -5  | 6 | 7 | 371  | 371  | 9   |
| -9  | 4 | 6 | 61   | 54   | 26  | -12 | 7 | 6 | 40   | 49   | 39  | -7  | 1 | 7 | 294  | 316  | 4   | 7   | 3 | 7 | 497  | 511  | 14  | -4  | 6 | 7 | 535  | 539  | 7   |
| -8  | 4 | 6 | 303  | 312  | 6   | -11 | 7 | 6 | 100  | 86   | 27  | -6  | 1 | 7 | 428  | 448  | 10  | 8   | 3 | 7 | 0    | 79   | 1   | -3  | 6 | 7 | 513  | 533  | 7   |
| -7  | 4 | 6 | 31   | 17   | 12  | -10 | 7 | 6 | 85   | 101  | 28  | -5  | 1 | 7 | 626  | 626  | 7   | 9   | 3 | 7 | 159  | 153  | 8   | -2  | 6 | 7 | 202  | 214  | 5   |
| -6  | 4 | 6 | 437  | 432  | 8   | -9  | 7 | 6 | 226  | 230  | 9   | -4  | 1 | 7 | 242  | 247  | 3   | 10  | 3 | 7 | 0    | 39   | 1   | -1  | 6 | 7 | 435  | 433  | 5   |
| -5  | 4 | 6 | 155  | 165  | 5   | -8  | 7 | 6 | 68   | 41   | 30  | -3  | 1 | 7 | 517  | 510  | 4   | 11  | 3 | 7 | 287  | 290  | 13  | 0   | 6 | 7 | 400  | 393  | 6   |
| -4  | 4 | 6 | 193  | 185  | 5   | -7  | 7 | 6 | 285  | 268  | 9   | -2  | 1 | 7 | 277  | 297  | 2   | 12  | 3 | 7 | 17   | 8    | 17  | 1   | 6 | 7 | 253  | 248  | 6   |
| -3  | 4 | 6 | 502  | 507  | 5   | -6  | 7 | 6 | 214  | 208  | 10  | -1  | 1 | 7 | 54   | 40   | 9   | 13  | 3 | 7 | 194  | 178  | 18  | 2   | 6 | 7 | 351  | 352  | 6   |
| -2  | 4 | 6 | 527  | 533  | 7   | -5  | 7 | 6 | 252  | 262  | 9   | 0   | 1 | 7 | 116  | 119  | 3   | 14  | 3 | 7 | 71   | 43   | 70  | 3   | 6 | 7 | 295  | 283  | 11  |
| -1  | 4 | 6 | 88   | 73   | 5   | -4  | 7 | 6 | 79   | 81   | 27  | 1   | 1 | 7 | 777  | 773  | 6   | 15  | 3 | 7 | 0    | 25   | 1   | 4   | 6 | 7 | 95   | 94   | 16  |
| 0   | 4 | 6 | 657  | 650  | 8   | -3  | 7 | 6 | 15   | 37   | 14  | 2   | 1 | 7 | 292  | 309  | 3   | -19 | 4 | 7 | 0    | 18   | 1   | 5   | 6 | 7 | 84   | 21   | 32  |
| 1   | 4 | 6 | 428  | 428  | 4   | -2  | 7 | 6 | 216  | 215  | 7   | 3   | 1 | 7 | 530  | 531  | 4   | -18 | 4 | 7 | 76   | 85   | 45  | 6   | 6 | 7 | 181  | 181  | 11  |
| 2   | 4 | 6 | 45   | 38   | 18  | -1  | 7 | 6 | 527  | 518  | 9   | 4   | 1 | 7 | 191  | 199  | 3   | -17 | 4 | 7 | 43   | 53   | 42  | 7   | 6 | 7 | 0    | 23   | 1   |
| 3   | 4 | 6 | 68   | 72   | 12  | 0   | 7 | 6 | 156  | 144  | 10  | 5   | 1 | 7 | 468  | 473  | 5   | -16 | 4 | 7 | 64   | 62   | 63  | 8   | 6 | 7 | 170  | 145  | 28  |
| 4   | 4 | 6 | 471  | 469  | 6   | 1   | 7 | 6 | 153  | 151  | 9   | 6   | 1 | 7 | 143  | 134  | 9   | -15 | 4 | 7 | 261  | 251  | 23  | 9   | 6 | 7 | 78   | 51   | 28  |
| 5   | 4 | 6 | 361  | 375  | 5   | 2   | 7 | 6 | 64   | 29   | 26  | 7   | 1 | 7 | 493  | 485  | 8   | -14 | 4 | 7 | 209  | 223  | 8   | 10  | 6 | 7 | 27   | 17   | 27  |
| 6   | 4 | 6 | 369  | 365  | 8   | 3   | 7 | 6 | 275  | 271  | 7   | 8   | 1 | 7 | 229  | 223  | 10  | -13 | 4 | 7 | 280  | 271  | 9   | 11  | 6 | 7 | 138  | 125  | 31  |
| 7   | 4 | 6 | 224  | 237  | 13  | 4   | 7 | 6 | 46   | 31   | 38  | 9   | 1 | 7 | 110  | 30   | 25  | -12 | 4 | 7 | 87   | 113  | 12  | -15 | 7 | 7 | 90   | 18   | 89  |
| 8   | 4 | 6 | 189  | 203  | 10  | 5   | 7 | 6 | 230  | 215  | 7   | 10  | 1 | 7 | 113  | 98   | 12  | -11 | 4 | 7 | 126  | 103  | 15  | -14 | 7 | 7 | 238  | 222  | 25  |
| 9   | 4 | 6 | 24   | 46   | 24  | 6   | 7 | 6 | 26   | 23   | 25  | 11  | 1 | 7 | 82   | 93   | 48  | -10 | 4 | 7 | 305  | 302  | 8   | -13 | 7 | 7 | 140  | 119  | 28  |
| 10  | 4 | 6 | 101  | 98   | 28  | 7   | 7 | 6 | 98   | 51   | 19  | 12  | 1 | 7 | 153  | 169  | 17  | -9  | 4 | 7 | 246  | 260  | 5   | -12 | 7 | 7 | 320  | 304  | 18  |
| 11  | 4 | 6 | 180  | 167  | 22  | 8   | 7 | 6 | 3    | 59   | 3   | 13  | 1 | 7 | 129  | 109  | 23  | -8  | 4 | 7 | 230  | 230  | 7   | -11 | 7 | 7 | 67   | 29   | 67  |
| 12  | 4 | 6 | 0    | 30   | 1   | 9   | 7 | 6 | 108  | 88   | 24  | 14  | 1 | 7 | 122  | 97   | 27  | -7  | 4 | 7 | 520  | 547  | 19  | -10 | 7 | 7 | 168  | 173  | 11  |
| 13  | 4 | 6 | 50   | 60   | 50  | 10  | 7 | 6 | 68   | 98   | 68  | 15  | 1 | 7 | 78   | 18   | 78  | -6  | 4 | 7 | 458  | 459  | 5   | -9  | 7 | 7 | 144  | 142  | 22  |
| 14  | 4 | 6 | 175  | 87   | 36  | -12 | 8 | 6 | 170  | 191  | 20  | 16  | 1 | 7 | 117  | 48   | 42  | -5  | 4 | 7 | 42   | 37   | 16  | -8  | 7 | 7 | 544  | 518  | 11  |
| -18 | 5 | 6 | 203  | 184  | 16  | -11 | 8 | 6 | 96   | 86   | 42  | -20 | 2 | 7 | 228  | 178  | 20  | -4  | 4 | 7 | 89   | 99   | 14  | -7  | 7 | 7 | 8    | 46   | 7   |
| -17 | 5 | 6 | 0    | 16   | 1   | -10 | 8 | 6 | 200  | 178  | 46  | -19 | 2 | 7 | 206  | 193  | 12  | -3  | 4 | 7 | 396  | 403  | 5   | -6  | 7 | 7 | 73   | 62   | 27  |
| -16 | 5 | 6 | 125  | 122  | 24  | -9  | 8 | 6 | 73   | 62   | 42  | -18 | 2 | 7 | 176  | 172  | 13  | -2  | 4 | 7 | 161  | 157  | 6   | -5  | 7 | 7 | 0    | 38   | 1   |
| -15 | 5 | 6 | 136  | 116  | 21  | -8  | 8 | 6 | 217  | 208  | 13  | -17 | 2 | 7 | 216  | 217  | 8   | -1  | 4 | 7 | 565  | 569  | 7   | -4  | 7 | 7 | 189  | 176  | 7   |
| -14 | 5 | 6 | 178  | 155  | 12  | -7  | 8 | 6 | 143  | 124  | 18  | -16 | 2 | 7 | 488  | 468  | 16  | 0   | 4 | 7 | 72   | 67   | 15  | -3  | 7 | 7 | 0    | 14   | 1   |
| -13 | 5 | 6 | 225  | 240  | 10  | -6  | 8 | 6 | 262  | 273  | 14  | -15 | 2 | 7 | 272  | 282  | 6   | 1   | 4 | 7 | 217  | 217  | 4   | -2  | 7 | 7 | 102  | 87   | 17  |
| -12 | 5 | 6 | 104  | 101  | 35  | -5  | 8 | 6 | 388  | 387  | 10  | -14 | 2 | 7 | 233  | 241  | 5   | 2   | 4 | 7 | 298  | 311  | 4   | -1  | 7 | 7 | 85   | 103  | 18  |
| -11 | 5 | 6 | 448  | 425  | 10  | -4  | 8 | 6 | 190  | 175  | 13  | -13 | 2 | 7 | 75   | 61   | 10  | 3   | 4 | 7 | 313  | 320  | 5   | 0   | 7 | 7 | 252  | 257  | 10  |
| -10 | 5 | 6 | 732  | 713  | 10  | -3  | 8 | 6 | 379  | 365  | 9   | -12 | 2 | 7 | 321  | 326  | 6   | 4   | 4 | 7 | 274  | 278  | 6   | 1   | 7 | 7 | 132  | 153  | 11  |
| -9  | 5 | 6 | 166  | 173  | 8   | -2  | 8 | 6 | 235  | 244  | 10  | -11 | 2 | 7 | 0    | 54   | 1   | 5   | 4 | 7 | 451  | 441  | 9   | 2   | 7 | 7 | 40   | 33   | 40  |
| -8  | 5 | 6 | 206  | 200  | 11  | -1  | 8 | 6 | 83   | 60   | 23  | -10 | 2 | 7 | 167  | 170  | 4   | 6   | 4 | 7 | 234  | 242  | 8   | 3   | 7 | 7 | 156  | 174  | 24  |
| -7  | 5 | 6 | 260  | 261  | 8   | 0   | 8 | 6 | 44   | 56   | 44  | -9  | 2 | 7 | 81   | 90   | 3   | 7   | 4 | 7 | 106  | 75   | 17  | 4   | 7 | 7 | 301  | 307  | 10  |
| -6  | 5 | 6 | 458  | 459  | 7   | 1   | 8 | 6 | 304  | 306  | 9   | -8  | 2 | 7 | 32   | 26   | 9   | 8   | 4 | 7 | 108  | 74   | 18  | 5   | 7 | 7 | 0    | 16   | 1   |
| -5  | 5 | 6 | 128  | 132  | 5   | 2   | 8 | 6 | 0    | 8    | 1   | -7  | 2 | 7 | 42   | 30   | 14  | 9   | 4 | 7 | 160  | 171  | 17  | 6   | 7 | 7 | 91   | 132  | 37  |
| -4  | 5 | 6 | 570  | 567  | 6   | 3   | 8 | 6 | 0    | 34   | 1   | -6  | 2 | 7 | 450  | 469  | 5   | 10  | 4 | 7 | 209  | 207  | 10  | 7   | 7 | 7 | 0    | 5    | 1   |
| -3  | 5 | 6 | 39   | 13   | 26  | 4   | 8 | 6 | 0    | 46   | 1   | -5  | 2 | 7 | 195  | 188  | 3   | 11  | 4 | 7 | 0    | 35   | 1   | 8   | 7 | 7 | 197  | 202  | 14  |
| -2  | 5 | 6 | 174  | 176  | 6   | 5   | 8 | 6 | 65   | 110  | 64  | -4  | 2 | 7 | 1011 | 1019 | 9   | 12  | 4 | 7 | 0    | 25   | 1   | 9   | 7 | 7 | 0    | 34   | 1   |
| -1  | 5 | 6 | 22   | 55   | 22  | 6   | 8 | 6 | 132  | 93   | 22  | -3  | 2 | 7 | 207  | 201  | 2   | 13  | 4 | 7 | 0    | 30   | 1   | 10  | 7 | 7 | 182  | 153  | 21  |
| 0   | 5 | 6 | 440  | 440  | 5   | 7   | 8 | 6 | 144  | 117  | 25  | -2  | 2 | 7 | 303  | 308  | 3   | 14  | 4 | 7 | 185  | 140  | 33  | -12 | 8 | 7 | 151  | 142  | 32  |
| 1   | 5 | 6 | 78   | 52   | 8   | -8  | 9 | 6 | 89   | 69   | 48  | -1  | 2 | 7 | 429  | 422  | 5   | -18 | 5 | 7 | 54   | 7    | 53  | -11 | 8 | 7 | 0    | 33   | 1   |
| 2   | 5 | 6 | 504  | 516  | 8   | -7  | 9 | 6 | 108  | 105  | 31  | 0   | 2 | 7 | 1283 | 1275 | 12  | -17 | 5 | 7 | 313  | 301  | 12  | -10 | 8 | 7 | 241  | 232  | 14  |
| 3   | 5 | 6 | 0    | 5    | 1   | -6  | 9 | 6 | 177  | 185  | 26  | 1   | 2 | 7 | 45   | 41   | 13  | -16 | 5 | 7 | 0    | 26   | 1   | -9  | 8 | 7 | 0    | 26   | 1   |
| 4   | 5 | 6 | 292  | 301  | 5   | -5  | 9 | 6 | 64   | 36   | 64  | 2   | 2 | 7 | 335  | 351  | 4   | -15 | 5 | 7 | 0    | 47   | 1   | -8  | 8 | 7 | 73   | 23   | 73  |
| 5   | 5 | 6 | 52   | 68   | 37  | -4  | 9 | 6 | 205  | 182  | 14  | 3   | 2 | 7 | 418  | 418  | 5   | -14 | 5 | 7 | 86   | 69   | 21  | -7  | 8 | 7 | 167  | 136  | 33  |
| 6   | 5 | 6 | 310  | 324  | 19  | -3  | 9 | 6 | 191  | 154  | 15  | 4   | 2 | 7 | 312  | 319  | 6   | -13 | 5 | 7 | 339  | 338  | 9   | -6  | 8 | 7 | 299  | 303  | 10  |
| 7   | 5 | 6 | 316  | 337  | 9   | -2  | 9 | 6 | 82   | 66   | 38  | 5   | 2 | 7 | 305  | 319  | 4   | -12 | 5 | 7 | 154  | 156  | 19  | -5  | 8 | 7 | 223  | 230  | 31  |
| 8   | 5 | 6 | 125  | 83   | 12  | -1  | 9 | 6 | 44   | 49   | 44  | 6   | 2 | 7 | 80   | 72   | 14  | -11 | 5 | 7 | 259  | 277  | 12  | -4  | 8 | 7 | 131  | 110  | 17  |
| 9   | 5 | 6 | 183  | 205  | 19  | 0   | 9 | 6 | 0    | 68   | 1   | 7   | 2 | 7 | 176  | 174  | 4   | -10 | 5 | 7 | 200  | 218  | 8   | -3  | 8 | 7 | 102  | 136  | 55  |
| 10  | 5 | 6 | 71   | 75   | 36  | 1   | 9 | 6 | 125  | 15   | 36  | 8   | 2 | 7 | 108  | 95   | 13  | -9  | 5 | 7 | 334  | 342  | 4   | -2  | 8 | 7 | 110  | 106  | 14  |
| 11  | 5 | 6 | 110  | 118  | 33  | 2   | 9 | 6 | 121  | 103  | 34  | 9   | 2 | 7 | 236  | 250  | 6   | -8  | 5 | 7 | 52   | 24   | 51  | -1  | 8 | 7 | 236  | 220  | 8   |
| 12  | 5 | 6 | 104  | 51   | 39  | 3   | 9 | 6 | 0    | 13   | 1   | 10  | 2 | 7 | 197  | 182  | 10  | -7  | 5 | 7 | 81   | 97</ |     |     |   |   |      |      |     |



Table 7. Observed and calculated structure factors for 1  
Page 6

| h   | k | l | 10Fo | 10Fc | 10s | h   | k | l | 10Fo | 10Fc | 10s | h   | k | l | 10Fo | 10Fc | 10s | h   | k | l | 10Fo | 10Fc | 10s | h   | k | l | 10Fo | 10Fc | 10s |
|-----|---|---|------|------|-----|-----|---|---|------|------|-----|-----|---|---|------|------|-----|-----|---|---|------|------|-----|-----|---|---|------|------|-----|
| -2  | 0 | 8 | 314  | 288  | 4   | -15 | 3 | 8 | 291  | 285  | 9   | 6   | 5 | 8 | 412  | 415  | 17  | 2   | 9 | 8 | 222  | 228  | 23  | 12  | 2 | 9 | 109  | 58   | 29  |
| 0   | 0 | 8 | 84   | 83   | 4   | -14 | 3 | 8 | 41   | 58   | 40  | 7   | 5 | 8 | 181  | 169  | 13  | -21 | 0 | 9 | 97   | 77   | 96  | 13  | 2 | 9 | 149  | 134  | 21  |
| 2   | 0 | 8 | 214  | 206  | 5   | -13 | 3 | 8 | 355  | 349  | 6   | 8   | 5 | 8 | 125  | 107  | 19  | -19 | 0 | 9 | 165  | 125  | 29  | 14  | 2 | 9 | 66   | 6    | 66  |
| 4   | 0 | 8 | 65   | 66   | 15  | -12 | 3 | 8 | 210  | 221  | 6   | 9   | 5 | 8 | 56   | 42   | 56  | -17 | 0 | 9 | 0    | 62   | 1   | -20 | 3 | 9 | 0    | 41   | 1   |
| 6   | 0 | 8 | 284  | 268  | 9   | -11 | 3 | 8 | 0    | 33   | 1   | 10  | 5 | 8 | 0    | 92   | 1   | -15 | 0 | 9 | 719  | 690  | 11  | -19 | 3 | 9 | 0    | 35   | 1   |
| 8   | 0 | 8 | 0    | 33   | 1   | -10 | 3 | 8 | 292  | 296  | 10  | 11  | 5 | 8 | 0    | 76   | 1   | -13 | 0 | 9 | 63   | 70   | 20  | -18 | 3 | 9 | 77   | 99   | 28  |
| 10  | 0 | 8 | 432  | 389  | 17  | -9  | 3 | 8 | 673  | 684  | 12  | 12  | 5 | 8 | 50   | 19   | 50  | -11 | 0 | 9 | 269  | 283  | 5   | -17 | 3 | 9 | 101  | 95   | 18  |
| 12  | 0 | 8 | 75   | 31   | 36  | -8  | 3 | 8 | 42   | 48   | 15  | -16 | 6 | 8 | 107  | 147  | 38  | -9  | 0 | 9 | 113  | 124  | 6   | -16 | 3 | 9 | 92   | 48   | 17  |
| 14  | 0 | 8 | 105  | 58   | 34  | -7  | 3 | 8 | 237  | 250  | 5   | -15 | 6 | 8 | 147  | 120  | 23  | -7  | 0 | 9 | 935  | 897  | 21  | -15 | 3 | 9 | 94   | 97   | 12  |
| -21 | 1 | 8 | 54   | 53   | 53  | -6  | 3 | 8 | 136  | 142  | 5   | -14 | 6 | 8 | 274  | 266  | 15  | -5  | 0 | 9 | 58   | 39   | 9   | -14 | 3 | 9 | 406  | 408  | 9   |
| -20 | 1 | 8 | 0    | 41   | 1   | -5  | 3 | 8 | 297  | 293  | 6   | -13 | 6 | 8 | 111  | 96   | 26  | -3  | 0 | 9 | 1172 | 1126 | 12  | -13 | 3 | 9 | 177  | 183  | 6   |
| -19 | 1 | 8 | 102  | 39   | 18  | -4  | 3 | 8 | 561  | 577  | 7   | -12 | 6 | 8 | 0    | 35   | 1   | -1  | 0 | 9 | 1021 | 1034 | 10  | -12 | 3 | 9 | 30   | 15   | 30  |
| -18 | 1 | 8 | 212  | 210  | 9   | -3  | 3 | 8 | 674  | 665  | 8   | -11 | 6 | 8 | 270  | 281  | 12  | 1   | 0 | 9 | 89   | 88   | 6   | -11 | 3 | 9 | 190  | 197  | 6   |
| -17 | 1 | 8 | 125  | 149  | 12  | -2  | 3 | 8 | 160  | 172  | 4   | -10 | 6 | 8 | 407  | 396  | 20  | 3   | 0 | 9 | 675  | 698  | 9   | -10 | 3 | 9 | 478  | 478  | 6   |
| -16 | 1 | 8 | 78   | 20   | 17  | -1  | 3 | 8 | 569  | 583  | 6   | -9  | 6 | 8 | 288  | 274  | 9   | 5   | 0 | 9 | 558  | 528  | 19  | -9  | 3 | 9 | 68   | 71   | 12  |
| -15 | 1 | 8 | 254  | 242  | 5   | 0   | 3 | 8 | 546  | 537  | 7   | -8  | 6 | 8 | 152  | 172  | 11  | 7   | 0 | 9 | 211  | 210  | 14  | -8  | 3 | 9 | 488  | 474  | 11  |
| -14 | 1 | 8 | 65   | 46   | 13  | 1   | 3 | 8 | 121  | 121  | 7   | -7  | 6 | 8 | 154  | 150  | 12  | 9   | 0 | 9 | 113  | 80   | 23  | -7  | 3 | 9 | 152  | 155  | 6   |
| -13 | 1 | 8 | 594  | 580  | 6   | 2   | 3 | 8 | 231  | 259  | 5   | -6  | 6 | 8 | 135  | 140  | 12  | 11  | 0 | 9 | 104  | 75   | 37  | -6  | 3 | 9 | 398  | 406  | 18  |
| -12 | 1 | 8 | 154  | 148  | 4   | 3   | 3 | 8 | 242  | 248  | 9   | -5  | 6 | 8 | 530  | 521  | 13  | 13  | 0 | 9 | 77   | 108  | 48  | -5  | 3 | 9 | 43   | 34   | 43  |
| -11 | 1 | 8 | 541  | 540  | 6   | 4   | 3 | 8 | 0    | 67   | 1   | -4  | 6 | 8 | 167  | 172  | 7   | -21 | 1 | 9 | 10   | 114  | 10  | -4  | 3 | 9 | 368  | 379  | 6   |
| -10 | 1 | 8 | 636  | 630  | 6   | 5   | 3 | 8 | 278  | 293  | 16  | -3  | 6 | 8 | 74   | 88   | 14  | -20 | 1 | 9 | 106  | 63   | 23  | -3  | 3 | 9 | 276  | 285  | 5   |
| -9  | 1 | 8 | 163  | 176  | 4   | 6   | 3 | 8 | 117  | 118  | 20  | -2  | 6 | 8 | 336  | 340  | 12  | -19 | 1 | 9 | 55   | 59   | 54  | -2  | 3 | 9 | 371  | 410  | 7   |
| -8  | 1 | 8 | 275  | 281  | 4   | 7   | 3 | 8 | 144  | 137  | 20  | -1  | 6 | 8 | 210  | 207  | 4   | -18 | 1 | 9 | 51   | 51   | 50  | -1  | 3 | 9 | 103  | 82   | 7   |
| -7  | 1 | 8 | 72   | 71   | 7   | 8   | 3 | 8 | 183  | 175  | 9   | 0   | 6 | 8 | 169  | 175  | 7   | -17 | 1 | 9 | 198  | 181  | 18  | 0   | 3 | 9 | 0    | 16   | 1   |
| -6  | 1 | 8 | 387  | 402  | 4   | 9   | 3 | 8 | 0    | 51   | 1   | 1   | 6 | 8 | 332  | 338  | 11  | -16 | 1 | 9 | 205  | 209  | 6   | 1   | 3 | 9 | 425  | 453  | 9   |
| -5  | 1 | 8 | 628  | 595  | 8   | 10  | 3 | 8 | 135  | 122  | 16  | 2   | 6 | 8 | 260  | 268  | 7   | -15 | 1 | 9 | 213  | 204  | 6   | 2   | 3 | 9 | 313  | 338  | 10  |
| -4  | 1 | 8 | 867  | 863  | 7   | 11  | 3 | 8 | 115  | 130  | 45  | 3   | 6 | 8 | 87   | 84   | 14  | -14 | 1 | 9 | 327  | 319  | 6   | 3   | 3 | 9 | 79   | 74   | 18  |
| -3  | 1 | 8 | 192  | 184  | 4   | 12  | 3 | 8 | 267  | 247  | 14  | 4   | 6 | 8 | 266  | 261  | 8   | -13 | 1 | 9 | 177  | 187  | 5   | 4   | 3 | 9 | 438  | 439  | 18  |
| -2  | 1 | 8 | 14   | 32   | 13  | 13  | 3 | 8 | 76   | 13   | 76  | 5   | 6 | 8 | 52   | 31   | 51  | -12 | 1 | 9 | 584  | 573  | 6   | 5   | 3 | 9 | 153  | 148  | 13  |
| -1  | 1 | 8 | 391  | 391  | 3   | 14  | 3 | 8 | 0    | 50   | 1   | 6   | 6 | 8 | 20   | 18   | 19  | -11 | 1 | 9 | 309  | 318  | 4   | 6   | 3 | 9 | 73   | 69   | 44  |
| 0   | 1 | 8 | 497  | 507  | 5   | -19 | 4 | 8 | 259  | 241  | 13  | 7   | 6 | 8 | 59   | 27   | 59  | -10 | 1 | 9 | 346  | 347  | 6   | 7   | 3 | 9 | 159  | 175  | 24  |
| 1   | 1 | 8 | 278  | 280  | 3   | -18 | 4 | 8 | 49   | 43   | 48  | 8   | 6 | 8 | 0    | 15   | 1   | -9  | 1 | 9 | 77   | 74   | 6   | 8   | 3 | 9 | 239  | 243  | 10  |
| 2   | 1 | 8 | 541  | 532  | 4   | -17 | 4 | 8 | 56   | 64   | 55  | 9   | 6 | 8 | 118  | 120  | 23  | -8  | 1 | 9 | 546  | 559  | 6   | 9   | 3 | 9 | 124  | 125  | 18  |
| 3   | 1 | 8 | 804  | 800  | 6   | -16 | 4 | 8 | 70   | 88   | 36  | 10  | 6 | 8 | 113  | 63   | 31  | -7  | 1 | 9 | 84   | 97   | 6   | 10  | 3 | 9 | 207  | 193  | 12  |
| 4   | 1 | 8 | 299  | 294  | 4   | -15 | 4 | 8 | 173  | 177  | 13  | 11  | 6 | 8 | 98   | 99   | 36  | -6  | 1 | 9 | 612  | 578  | 5   | 11  | 3 | 9 | 136  | 142  | 23  |
| 5   | 1 | 8 | 264  | 270  | 5   | -14 | 4 | 8 | 175  | 174  | 9   | -14 | 7 | 8 | 153  | 116  | 73  | -5  | 1 | 9 | 1188 | 1161 | 11  | 12  | 3 | 9 | 107  | 78   | 82  |
| 6   | 1 | 8 | 155  | 163  | 8   | -13 | 4 | 8 | 0    | 39   | 1   | -13 | 7 | 8 | 0    | 71   | 1   | -4  | 1 | 9 | 88   | 99   | 5   | 13  | 3 | 9 | 80   | 97   | 52  |
| 7   | 1 | 8 | 254  | 270  | 7   | -12 | 4 | 8 | 81   | 76   | 16  | -12 | 7 | 8 | 183  | 172  | 16  | -3  | 1 | 9 | 840  | 807  | 6   | -19 | 4 | 9 | 204  | 164  | 16  |
| 8   | 1 | 8 | 0    | 40   | 1   | -11 | 4 | 8 | 62   | 31   | 13  | -11 | 7 | 8 | 165  | 132  | 20  | -2  | 1 | 9 | 654  | 658  | 4   | -18 | 4 | 9 | 105  | 67   | 22  |
| 9   | 1 | 8 | 82   | 89   | 82  | -10 | 4 | 8 | 115  | 108  | 7   | -10 | 7 | 8 | 68   | 25   | 67  | -1  | 1 | 9 | 454  | 453  | 3   | -17 | 4 | 9 | 80   | 46   | 79  |
| 10  | 1 | 8 | 30   | 48   | 29  | -9  | 4 | 8 | 79   | 78   | 5   | -9  | 7 | 8 | 202  | 215  | 9   | 0   | 1 | 9 | 102  | 111  | 8   | -16 | 4 | 9 | 79   | 66   | 36  |
| 11  | 1 | 8 | 79   | 87   | 38  | -8  | 4 | 8 | 449  | 451  | 6   | -8  | 7 | 8 | 267  | 266  | 8   | 1   | 1 | 9 | 239  | 247  | 2   | -15 | 4 | 9 | 92   | 75   | 29  |
| 12  | 1 | 8 | 105  | 103  | 18  | -7  | 4 | 8 | 242  | 241  | 7   | -7  | 7 | 8 | 420  | 391  | 12  | 2   | 1 | 9 | 200  | 209  | 3   | -14 | 4 | 9 | 312  | 325  | 8   |
| 13  | 1 | 8 | 0    | 28   | 1   | -6  | 4 | 8 | 358  | 369  | 7   | -6  | 7 | 8 | 30   | 22   | 30  | 3   | 1 | 9 | 76   | 86   | 6   | -13 | 4 | 9 | 81   | 72   | 35  |
| 14  | 1 | 8 | 71   | 91   | 71  | -5  | 4 | 8 | 404  | 416  | 5   | -5  | 7 | 8 | 143  | 154  | 13  | 4   | 1 | 9 | 182  | 183  | 4   | -12 | 4 | 9 | 208  | 210  | 14  |
| 15  | 1 | 8 | 75   | 86   | 75  | -4  | 4 | 8 | 421  | 432  | 6   | -4  | 7 | 8 | 151  | 144  | 14  | 5   | 1 | 9 | 329  | 316  | 6   | -11 | 4 | 9 | 97   | 95   | 18  |
| -20 | 2 | 8 | 0    | 17   | 1   | -3  | 4 | 8 | 256  | 264  | 6   | -3  | 7 | 8 | 475  | 458  | 11  | 6   | 1 | 9 | 345  | 343  | 7   | -10 | 4 | 9 | 107  | 111  | 6   |
| -19 | 2 | 8 | 97   | 130  | 30  | -2  | 4 | 8 | 806  | 792  | 9   | -2  | 7 | 8 | 109  | 97   | 13  | 7   | 1 | 9 | 254  | 244  | 7   | -9  | 4 | 9 | 520  | 505  | 6   |
| -18 | 2 | 8 | 126  | 105  | 17  | -1  | 4 | 8 | 407  | 406  | 5   | -1  | 7 | 8 | 133  | 124  | 11  | 8   | 1 | 9 | 34   | 12   | 34  | -8  | 4 | 9 | 221  | 229  | 8   |
| -17 | 2 | 8 | 192  | 197  | 12  | 0   | 4 | 8 | 149  | 159  | 5   | 0   | 7 | 8 | 42   | 9    | 41  | 9   | 1 | 9 | 36   | 15   | 36  | -7  | 4 | 9 | 502  | 508  | 6   |
| -16 | 2 | 8 | 0    | 33   | 1   | 1   | 4 | 8 | 242  | 257  | 5   | 1   | 7 | 8 | 232  | 213  | 9   | 10  | 1 | 9 | 122  | 102  | 16  | -6  | 4 | 9 | 93   | 104  | 6   |
| -15 | 2 | 8 | 266  | 267  | 8   | 2   | 4 | 8 | 167  | 153  | 8   | 2   | 7 | 8 | 100  | 121  | 22  | 11  | 1 | 9 | 60   | 74   | 52  | -5  | 4 | 9 | 0    | 17   | 1   |
| -14 | 2 | 8 | 99   | 114  | 9   | 3   | 4 | 8 | 0    | 22   | 1   | 3   | 7 | 8 | 156  | 162  | 11  | 12  | 1 | 9 | 67   | 67   | 66  | -4  | 4 | 9 | 253  | 274  | 6   |
| -13 | 2 | 8 | 242  | 239  | 5   | 4   | 4 | 8 | 246  | 244  | 12  | 4   | 7 | 8 | 52   | 42   | 51  | 13  | 1 | 9 | 96   | 46   | 40  | -3  | 4 | 9 | 390  | 386  | 8   |
| -12 | 2 | 8 | 242  | 247  | 6   | 5   | 4 | 8 | 198  | 188  | 13  | 5   | 7 | 8 | 146  | 147  | 25  | 14  | 1 | 9 | 178  | 173  | 18  | -2  | 4 | 9 | 246  | 249  | 4   |
| -11 | 2 | 8 | 517  | 520  | 6   | 6   | 4 | 8 | 193  | 183  | 21  | 6   | 7 | 8 | 0    | 15   | 1   | -20 | 2 | 9 | 155  | 149  | 13  | -1  | 4 | 9 | 493  | 503  | 7   |
| -10 | 2 | 8 | 335  | 339  | 8   | 7   | 4 | 8 | 0    | 53   | 1   | 7   | 7 | 8 | 27   | 51   | 26  | -19 | 2 | 9 | 0    | 25   | 1   | 0   | 4 | 9 | 486  | 492  | 7   |
| -9  | 2 | 8 | 380  | 365  | 6   | 8   | 4 | 8 | 219  | 225  | 11  | 8   | 7 | 8 | 0    | 25   | 1   | -18 | 2 | 9 | 86   | 69   | 30  | 1   | 4 | 9 | 188  | 193  | 10  |
| -8  | 2 | 8 | 53   | 51   | 13  | 9   | 4 | 8 | 405  | 383  | 11  | 9   | 7 | 8 | 82   | 35   | 42  | -17 |   |   |      |      |     |     |   |   |      |      |     |

Table 7. Observed and calculated structure factors for 3a  
Page 7

| h   | k | l | 10Fo | 10Fc | 10s | h   | k | l  | 10Fo | 10Fc | 10s | h   | k | l  | 10Fo | 10Fc | 10s | h   | k | l  | 10Fo | 10Fc | 10s | h   | k | l  | 10Fo | 10Fc | 10s |
|-----|---|---|------|------|-----|-----|---|----|------|------|-----|-----|---|----|------|------|-----|-----|---|----|------|------|-----|-----|---|----|------|------|-----|
| 0   | 5 | 9 | 0    | 6    | 1   | -20 | 0 | 10 | 154  | 170  | 19  | 13  | 2 | 10 | 107  | 97   | 33  | 2   | 5 | 10 | 162  | 163  | 12  | -3  | 0 | 11 | 849  | 855  | 9   |
| 1   | 5 | 9 | 390  | 390  | 9   | -18 | 0 | 10 | 56   | 15   | 55  | -20 | 3 | 10 | 80   | 105  | 79  | 3   | 5 | 10 | 19   | 30   | 18  | -1  | 0 | 11 | 134  | 121  | 5   |
| 2   | 5 | 9 | 79   | 97   | 26  | -16 | 0 | 10 | 146  | 132  | 10  | -19 | 3 | 10 | 85   | 58   | 41  | 4   | 5 | 10 | 239  | 245  | 14  | 1   | 0 | 11 | 117  | 118  | 7   |
| 3   | 5 | 9 | 213  | 218  | 12  | -14 | 0 | 10 | 463  | 458  | 7   | -18 | 3 | 10 | 87   | 71   | 45  | 5   | 5 | 10 | 114  | 117  | 42  | 3   | 0 | 11 | 320  | 322  | 8   |
| 4   | 5 | 9 | 112  | 85   | 17  | -12 | 0 | 10 | 213  | 218  | 11  | -17 | 3 | 10 | 52   | 50   | 51  | 6   | 5 | 10 | 239  | 235  | 15  | 5   | 0 | 11 | 41   | 75   | 41  |
| 5   | 5 | 9 | 122  | 73   | 14  | -10 | 0 | 10 | 471  | 502  | 13  | -16 | 3 | 10 | 0    | 65   | 1   | 7   | 5 | 10 | 41   | 60   | 41  | 7   | 0 | 11 | 0    | 16   | 1   |
| 6   | 5 | 9 | 123  | 115  | 29  | -8  | 0 | 10 | 568  | 596  | 9   | -15 | 3 | 10 | 198  | 205  | 10  | 8   | 5 | 10 | 103  | 82   | 36  | 9   | 0 | 11 | 169  | 109  | 23  |
| 7   | 5 | 9 | 152  | 149  | 24  | -6  | 0 | 10 | 333  | 319  | 4   | -14 | 3 | 10 | 295  | 296  | 11  | 9   | 5 | 10 | 104  | 103  | 36  | 11  | 0 | 11 | 231  | 226  | 20  |
| 8   | 5 | 9 | 44   | 13   | 44  | -4  | 0 | 10 | 830  | 823  | 10  | -13 | 3 | 10 | 469  | 467  | 7   | 10  | 5 | 10 | 0    | 4    | 1   | 13  | 0 | 11 | 64   | 166  | 63  |
| 9   | 5 | 9 | 0    | 18   | 1   | -2  | 0 | 10 | 1345 | 1280 | 16  | -12 | 3 | 10 | 54   | 25   | 47  | 11  | 5 | 10 | 113  | 110  | 39  | -21 | 1 | 11 | 0    | 33   | 1   |
| 10  | 5 | 9 | 93   | 66   | 36  | 0   | 0 | 10 | 292  | 287  | 4   | -11 | 3 | 10 | 275  | 280  | 5   | -16 | 6 | 10 | 209  | 201  | 15  | -20 | 1 | 11 | 137  | 18   | 28  |
| 11  | 5 | 9 | 142  | 93   | 42  | 2   | 0 | 10 | 426  | 433  | 10  | -10 | 3 | 10 | 567  | 574  | 8   | -15 | 6 | 10 | 197  | 207  | 15  | -19 | 1 | 11 | 254  | 222  | 11  |
| -16 | 6 | 9 | 159  | 184  | 19  | 4   | 0 | 10 | 492  | 474  | 14  | -9  | 3 | 10 | 695  | 688  | 7   | -14 | 6 | 10 | 64   | 64   | 63  | -18 | 1 | 11 | 111  | 121  | 20  |
| -15 | 6 | 9 | 40   | 37   | 39  | 6   | 0 | 10 | 454  | 423  | 10  | -8  | 3 | 10 | 353  | 347  | 4   | -13 | 6 | 10 | 90   | 18   | 28  | -17 | 1 | 11 | 44   | 60   | 43  |
| -14 | 6 | 9 | 76   | 9    | 44  | 8   | 0 | 10 | 300  | 285  | 14  | -7  | 3 | 10 | 183  | 182  | 4   | -12 | 6 | 10 | 96   | 25   | 45  | -16 | 1 | 11 | 0    | 22   | 1   |
| -13 | 6 | 9 | 267  | 245  | 10  | 10  | 0 | 10 | 188  | 175  | 20  | -6  | 3 | 10 | 439  | 445  | 19  | -11 | 6 | 10 | 248  | 259  | 17  | -15 | 1 | 11 | 342  | 351  | 5   |
| -12 | 6 | 9 | 196  | 188  | 37  | 12  | 0 | 10 | 304  | 262  | 19  | -5  | 3 | 10 | 168  | 166  | 5   | -10 | 6 | 10 | 184  | 192  | 9   | -14 | 1 | 11 | 201  | 197  | 5   |
| -11 | 6 | 9 | 55   | 67   | 54  | 14  | 0 | 10 | 0    | 51   | 1   | -4  | 3 | 10 | 246  | 250  | 4   | -9  | 6 | 10 | 54   | 44   | 54  | -13 | 1 | 11 | 284  | 283  | 6   |
| -10 | 6 | 9 | 133  | 131  | 14  | -21 | 1 | 10 | 100  | 57   | 44  | -3  | 3 | 10 | 458  | 472  | 7   | -8  | 6 | 10 | 292  | 293  | 14  | -12 | 1 | 11 | 81   | 74   | 9   |
| -9  | 6 | 9 | 463  | 444  | 9   | -20 | 1 | 10 | 133  | 126  | 22  | -2  | 3 | 10 | 158  | 164  | 4   | -7  | 6 | 10 | 192  | 174  | 11  | -11 | 1 | 11 | 55   | 56   | 23  |
| -8  | 6 | 9 | 108  | 72   | 20  | -19 | 1 | 10 | 144  | 128  | 13  | -1  | 3 | 10 | 157  | 178  | 5   | -6  | 6 | 10 | 217  | 232  | 8   | -10 | 1 | 11 | 524  | 525  | 7   |
| -7  | 6 | 9 | 204  | 173  | 10  | -18 | 1 | 10 | 115  | 99   | 15  | 0   | 3 | 10 | 174  | 184  | 5   | -5  | 6 | 10 | 42   | 42   | 41  | -9  | 1 | 11 | 16   | 3    | 16  |
| -6  | 6 | 9 | 164  | 179  | 7   | -17 | 1 | 10 | 105  | 111  | 13  | 1   | 3 | 10 | 250  | 270  | 6   | -4  | 6 | 10 | 405  | 415  | 16  | -8  | 1 | 11 | 120  | 109  | 5   |
| -5  | 6 | 9 | 355  | 362  | 14  | -16 | 1 | 10 | 274  | 268  | 5   | 2   | 3 | 10 | 457  | 473  | 8   | -3  | 6 | 10 | 97   | 99   | 14  | -7  | 1 | 11 | 510  | 512  | 5   |
| -4  | 6 | 9 | 208  | 212  | 14  | -15 | 1 | 10 | 240  | 240  | 5   | 3   | 3 | 10 | 258  | 283  | 6   | -2  | 6 | 10 | 257  | 247  | 11  | -6  | 1 | 11 | 0    | 22   | 1   |
| -3  | 6 | 9 | 384  | 378  | 6   | -14 | 1 | 10 | 163  | 154  | 10  | 4   | 3 | 10 | 186  | 185  | 7   | -1  | 6 | 10 | 160  | 168  | 10  | -5  | 1 | 11 | 323  | 329  | 3   |
| -2  | 6 | 9 | 84   | 72   | 13  | -13 | 1 | 10 | 134  | 138  | 6   | 5   | 3 | 10 | 167  | 172  | 7   | 0   | 6 | 10 | 91   | 87   | 20  | -4  | 1 | 11 | 393  | 389  | 3   |
| -1  | 6 | 9 | 119  | 103  | 14  | -12 | 1 | 10 | 588  | 591  | 5   | 6   | 3 | 10 | 330  | 336  | 9   | 1   | 6 | 10 | 75   | 80   | 33  | -3  | 1 | 11 | 106  | 105  | 4   |
| 0   | 6 | 9 | 45   | 65   | 44  | -11 | 1 | 10 | 95   | 98   | 8   | 7   | 3 | 10 | 138  | 151  | 30  | 2   | 6 | 10 | 116  | 134  | 18  | -2  | 1 | 11 | 591  | 591  | 5   |
| 1   | 6 | 9 | 55   | 68   | 37  | -10 | 1 | 10 | 373  | 396  | 10  | 8   | 3 | 10 | 0    | 4    | 1   | 3   | 6 | 10 | 89   | 11   | 24  | -1  | 1 | 11 | 397  | 390  | 3   |
| 2   | 6 | 9 | 0    | 40   | 1   | -9  | 1 | 10 | 437  | 430  | 6   | 9   | 3 | 10 | 162  | 145  | 13  | 4   | 6 | 10 | 0    | 37   | 1   | 0   | 1 | 11 | 26   | 14   | 25  |
| 3   | 6 | 9 | 0    | 41   | 1   | -8  | 1 | 10 | 718  | 714  | 8   | 10  | 3 | 10 | 67   | 94   | 42  | 5   | 6 | 10 | 61   | 51   | 39  | 1   | 1 | 11 | 229  | 232  | 6   |
| 4   | 6 | 9 | 154  | 138  | 21  | -7  | 1 | 10 | 522  | 530  | 6   | 11  | 3 | 10 | 0    | 12   | 1   | 6   | 6 | 10 | 57   | 16   | 57  | 2   | 1 | 11 | 217  | 214  | 4   |
| 5   | 6 | 9 | 162  | 144  | 16  | -6  | 1 | 10 | 373  | 376  | 3   | 12  | 3 | 10 | 131  | 64   | 44  | 7   | 6 | 10 | 81   | 72   | 80  | 3   | 1 | 11 | 91   | 97   | 7   |
| 6   | 6 | 9 | 174  | 174  | 12  | -5  | 1 | 10 | 25   | 12   | 24  | 13  | 3 | 10 | 109  | 18   | 108 | 8   | 6 | 10 | 44   | 76   | 44  | 4   | 1 | 11 | 210  | 213  | 8   |
| 7   | 6 | 9 | 82   | 56   | 38  | -4  | 1 | 10 | 305  | 298  | 3   | -19 | 4 | 10 | 4    | 57   | 3   | 9   | 6 | 10 | 33   | 4    | 33  | 5   | 1 | 11 | 156  | 152  | 8   |
| 8   | 6 | 9 | 0    | 26   | 1   | -3  | 1 | 10 | 466  | 485  | 3   | -18 | 4 | 10 | 107  | 43   | 24  | -14 | 7 | 10 | 0    | 36   | 1   | 6   | 1 | 11 | 214  | 216  | 8   |
| 9   | 6 | 9 | 79   | 51   | 79  | -2  | 1 | 10 | 660  | 629  | 4   | -17 | 4 | 10 | 25   | 33   | 24  | -13 | 7 | 10 | 246  | 229  | 14  | 7   | 1 | 11 | 265  | 249  | 8   |
| 10  | 6 | 9 | 126  | 24   | 54  | -1  | 1 | 10 | 770  | 767  | 7   | -16 | 4 | 10 | 262  | 274  | 10  | -12 | 7 | 10 | 0    | 46   | 1   | 8   | 1 | 11 | 128  | 99   | 15  |
| -14 | 7 | 9 | 232  | 208  | 17  | 0   | 1 | 10 | 687  | 683  | 6   | -15 | 4 | 10 | 40   | 33   | 40  | -11 | 7 | 10 | 153  | 140  | 17  | 9   | 1 | 11 | 72   | 99   | 71  |
| -13 | 7 | 9 | 146  | 146  | 19  | 1   | 1 | 10 | 221  | 232  | 3   | -14 | 4 | 10 | 261  | 269  | 8   | -10 | 7 | 10 | 50   | 103  | 50  | 10  | 1 | 11 | 75   | 88   | 61  |
| -12 | 7 | 9 | 90   | 92   | 41  | 2   | 1 | 10 | 254  | 265  | 4   | -13 | 4 | 10 | 80   | 34   | 17  | -9  | 7 | 10 | 336  | 314  | 11  | 11  | 1 | 11 | 94   | 51   | 37  |
| -11 | 7 | 9 | 73   | 77   | 31  | 3   | 1 | 10 | 460  | 455  | 6   | -12 | 4 | 10 | 47   | 61   | 46  | -8  | 7 | 10 | 122  | 103  | 20  | 12  | 1 | 11 | 122  | 94   | 22  |
| -10 | 7 | 9 | 160  | 145  | 17  | 4   | 1 | 10 | 34   | 20   | 16  | -11 | 4 | 10 | 539  | 538  | 7   | -7  | 7 | 10 | 174  | 173  | 14  | 13  | 1 | 11 | 0    | 66   | 1   |
| -9  | 7 | 9 | 158  | 151  | 13  | 5   | 1 | 10 | 113  | 128  | 9   | -10 | 4 | 10 | 77   | 75   | 8   | -6  | 7 | 10 | 118  | 118  | 24  | -20 | 2 | 11 | 75   | 8    | 40  |
| -8  | 7 | 9 | 171  | 181  | 11  | 6   | 1 | 10 | 130  | 141  | 11  | -9  | 4 | 10 | 142  | 142  | 5   | -5  | 7 | 10 | 181  | 160  | 26  | -19 | 2 | 11 | 0    | 23   | 1   |
| -7  | 7 | 9 | 121  | 104  | 36  | 7   | 1 | 10 | 149  | 143  | 11  | -8  | 4 | 10 | 306  | 313  | 4   | -4  | 7 | 10 | 199  | 190  | 10  | -18 | 2 | 11 | 100  | 69   | 17  |
| -6  | 7 | 9 | 238  | 229  | 28  | 8   | 1 | 10 | 74   | 18   | 39  | -7  | 4 | 10 | 740  | 730  | 9   | -3  | 7 | 10 | 239  | 234  | 10  | -17 | 2 | 11 | 0    | 57   | 1   |
| -5  | 7 | 9 | 33   | 36   | 32  | 9   | 1 | 10 | 0    | 36   | 1   | -6  | 4 | 10 | 258  | 265  | 4   | -2  | 7 | 10 | 72   | 78   | 20  | -16 | 2 | 11 | 395  | 398  | 8   |
| -4  | 7 | 9 | 215  | 195  | 43  | 10  | 1 | 10 | 122  | 117  | 21  | -5  | 4 | 10 | 117  | 110  | 11  | -1  | 7 | 10 | 208  | 214  | 10  | -15 | 2 | 11 | 257  | 268  | 6   |
| -3  | 7 | 9 | 86   | 105  | 34  | 11  | 1 | 10 | 251  | 236  | 12  | -4  | 4 | 10 | 539  | 557  | 13  | 0   | 7 | 10 | 137  | 140  | 17  | -14 | 2 | 11 | 143  | 144  | 6   |
| -2  | 7 | 9 | 400  | 401  | 20  | 12  | 1 | 10 | 96   | 30   | 36  | -3  | 4 | 10 | 135  | 141  | 8   | 1   | 7 | 10 | 169  | 155  | 14  | -13 | 2 | 11 | 276  | 267  | 4   |
| -1  | 7 | 9 | 68   | 46   | 28  | 13  | 1 | 10 | 116  | 131  | 26  | -2  | 4 | 10 | 264  | 284  | 9   | 2   | 7 | 10 | 62   | 87   | 62  | -12 | 2 | 11 | 860  | 848  | 8   |
| 0   | 7 | 9 | 140  | 149  | 10  | 14  | 1 | 10 | 0    | 34   | 1   | -1  | 4 | 10 | 31   | 34   | 30  | 3   | 7 | 10 | 225  | 198  | 12  | -11 | 2 | 11 | 165  | 163  | 6   |
| 1   | 7 | 9 | 248  | 249  | 11  | -20 | 2 | 10 | 0    | 62   | 1   | 0   | 4 | 10 | 0    | 52   | 1   | 4   | 7 | 10 | 64   | 17   | 64  | -10 | 2 | 11 | 0    | 31   | 1   |
| 2   | 7 | 9 | 317  | 319  | 10  | -19 | 2 | 10 | 44   | 59   | 44  | 1   | 4 | 10 | 127  | 120  | 8   | 5   | 7 | 10 | 160  | 162  | 20  | -9  | 2 | 11 | 307  | 313  | 4   |
| 3   | 7 | 9 | 170  | 187  | 16  | -18 | 2 | 10 | 76   | 16   | 37  | 2   | 4 | 10 | 214  | 222  | 14  | 6   | 7 | 10 | 101  | 48   | 25  | -8  | 2 | 11 | 778  | 787  | 24  |
| 4   | 7 | 9 | 210  | 196  | 13  | -17 | 2 | 10 | 266  | 255  | 10  | 3   | 4 |    |      |      |     |     |   |    |      |      |     |     |   |    |      |      |     |

Table 7. Observed and calculated structure factors for 3a

| h k l |   |    | 10Fo |     |    | 10Fc |   |    | 10s |     |     | h k l |   |    | 10Fo |     |    | 10Fc |   |    | 10s |     |    | h k l |   |    | 10Fo |     |    | 10Fc |  |  | 10s |  |  | h k l |  |  | 10Fo |  |  | 10Fc |  |  | 10s |  |  |
|-------|---|----|------|-----|----|------|---|----|-----|-----|-----|-------|---|----|------|-----|----|------|---|----|-----|-----|----|-------|---|----|------|-----|----|------|--|--|-----|--|--|-------|--|--|------|--|--|------|--|--|-----|--|--|
| -11   | 3 | 11 | 103  | 109 | 26 | -13  | 6 | 11 | 50  | 70  | 49  | -8    | 1 | 12 | 76   | 72  | 16 | -17  | 4 | 12 | 207 | 219 | 14 | -7    | 7 | 12 | 96   | 67  | 39 |      |  |  |     |  |  |       |  |  |      |  |  |      |  |  |     |  |  |
| -10   | 3 | 11 | 394  | 397 | 4  | -12  | 6 | 11 | 186 | 200 | 16  | -7    | 1 | 12 | 182  | 194 | 4  | -16  | 4 | 12 | 188 | 196 | 23 | -6    | 7 | 12 | 49   | 67  | 48 |      |  |  |     |  |  |       |  |  |      |  |  |      |  |  |     |  |  |
| -9    | 3 | 11 | 693  | 685 | 8  | -11  | 6 | 11 | 248 | 242 | 10  | -6    | 1 | 12 | 472  | 477 | 4  | -15  | 4 | 12 | 134 | 138 | 16 | -5    | 7 | 12 | 75   | 43  | 75 |      |  |  |     |  |  |       |  |  |      |  |  |      |  |  |     |  |  |
| -8    | 3 | 11 | 443  | 444 | 5  | -10  | 6 | 11 | 257 | 253 | 10  | -5    | 1 | 12 | 534  | 548 | 5  | -14  | 4 | 12 | 40  | 94  | 40 | -4    | 7 | 12 | 91   | 116 | 31 |      |  |  |     |  |  |       |  |  |      |  |  |      |  |  |     |  |  |
| -7    | 3 | 11 | 365  | 368 | 5  | -9   | 6 | 11 | 271 | 272 | 9   | -4    | 1 | 12 | 723  | 714 | 6  | -13  | 4 | 12 | 229 | 237 | 10 | -3    | 7 | 12 | 298  | 288 | 11 |      |  |  |     |  |  |       |  |  |      |  |  |      |  |  |     |  |  |
| -6    | 3 | 11 | 65   | 56  | 14 | -8   | 6 | 11 | 48  | 69  | 47  | -3    | 1 | 12 | 156  | 157 | 3  | -12  | 4 | 12 | 0   | 36  | 1  | -2    | 7 | 12 | 115  | 74  | 20 |      |  |  |     |  |  |       |  |  |      |  |  |      |  |  |     |  |  |
| -5    | 3 | 11 | 662  | 665 | 8  | -7   | 6 | 11 | 95  | 92  | 23  | -2    | 1 | 12 | 135  | 139 | 9  | -11  | 4 | 12 | 242 | 246 | 17 | -1    | 7 | 12 | 95   | 92  | 41 |      |  |  |     |  |  |       |  |  |      |  |  |      |  |  |     |  |  |
| -4    | 3 | 11 | 436  | 431 | 5  | -6   | 6 | 11 | 264 | 256 | 9   | -1    | 1 | 12 | 42   | 30  | 19 | -10  | 4 | 12 | 279 | 272 | 10 | 0     | 7 | 12 | 148  | 154 | 15 |      |  |  |     |  |  |       |  |  |      |  |  |      |  |  |     |  |  |
| -3    | 3 | 11 | 75   | 78  | 9  | -5   | 6 | 11 | 186 | 203 | 8   | 0     | 1 | 12 | 483  | 474 | 5  | -9   | 4 | 12 | 75  | 24  | 22 | 1     | 7 | 12 | 177  | 202 | 18 |      |  |  |     |  |  |       |  |  |      |  |  |      |  |  |     |  |  |
| -2    | 3 | 11 | 341  | 355 | 4  | -4   | 6 | 11 | 148 | 135 | 9   | 1     | 1 | 12 | 42   | 52  | 22 | -8   | 4 | 12 | 359 | 358 | 12 | 2     | 7 | 12 | 0    | 46  | 1  |      |  |  |     |  |  |       |  |  |      |  |  |      |  |  |     |  |  |
| -1    | 3 | 11 | 423  | 451 | 7  | -3   | 6 | 11 | 65  | 77  | 24  | 2     | 1 | 12 | 75   | 62  | 10 | -7   | 4 | 12 | 126 | 143 | 11 | 3     | 7 | 12 | 192  | 180 | 18 |      |  |  |     |  |  |       |  |  |      |  |  |      |  |  |     |  |  |
| 0     | 3 | 11 | 0    | 19  | 1  | -2   | 6 | 11 | 90  | 90  | 17  | 3     | 1 | 12 | 68   | 91  | 9  | -6   | 4 | 12 | 124 | 143 | 8  | 4     | 7 | 12 | 0    | 11  | 1  |      |  |  |     |  |  |       |  |  |      |  |  |      |  |  |     |  |  |
| 1     | 3 | 11 | 22   | 29  | 21 | -1   | 6 | 11 | 135 | 146 | 29  | 4     | 1 | 12 | 273  | 279 | 6  | -5   | 4 | 12 | 174 | 179 | 7  | 5     | 7 | 12 | 104  | 84  | 68 |      |  |  |     |  |  |       |  |  |      |  |  |      |  |  |     |  |  |
| 2     | 3 | 11 | 224  | 240 | 8  | 0    | 6 | 11 | 131 | 123 | 16  | 5     | 1 | 12 | 180  | 153 | 6  | -4   | 4 | 12 | 258 | 261 | 6  | -10   | 8 | 12 | 0    | 36  | 1  |      |  |  |     |  |  |       |  |  |      |  |  |      |  |  |     |  |  |
| 3     | 3 | 11 | 252  | 270 | 6  | 1    | 6 | 11 | 68  | 62  | 30  | 6     | 1 | 12 | 238  | 234 | 8  | -3   | 4 | 12 | 0   | 41  | 1  | -9    | 8 | 12 | 65   | 25  | 65 |      |  |  |     |  |  |       |  |  |      |  |  |      |  |  |     |  |  |
| 4     | 3 | 11 | 93   | 111 | 12 | 2    | 6 | 11 | 181 | 190 | 21  | 7     | 1 | 12 | 56   | 66  | 56 | -2   | 4 | 12 | 469 | 486 | 17 | -8    | 8 | 12 | 139  | 163 | 35 |      |  |  |     |  |  |       |  |  |      |  |  |      |  |  |     |  |  |
| 5     | 3 | 11 | 175  | 177 | 11 | 3    | 6 | 11 | 297 | 292 | 10  | 8     | 1 | 12 | 34   | 19  | 33 | -1   | 4 | 12 | 234 | 230 | 12 | -7    | 8 | 12 | 44   | 93  | 44 |      |  |  |     |  |  |       |  |  |      |  |  |      |  |  |     |  |  |
| 6     | 3 | 11 | 145  | 149 | 24 | 4    | 6 | 11 | 136 | 96  | 27  | 9     | 1 | 12 | 181  | 156 | 13 | 0    | 4 | 12 | 0   | 38  | 1  | -6    | 8 | 12 | 41   | 47  | 41 |      |  |  |     |  |  |       |  |  |      |  |  |      |  |  |     |  |  |
| 7     | 3 | 11 | 138  | 121 | 17 | 5    | 6 | 11 | 152 | 152 | 21  | 10    | 1 | 12 | 0    | 9   | 1  | 1    | 4 | 12 | 278 | 295 | 9  | -5    | 8 | 12 | 158  | 161 | 16 |      |  |  |     |  |  |       |  |  |      |  |  |      |  |  |     |  |  |
| 8     | 3 | 11 | 0    | 32  | 1  | 6    | 6 | 11 | 161 | 155 | 30  | 11    | 1 | 12 | 75   | 62  | 75 | 2    | 4 | 12 | 302 | 317 | 12 | -4    | 8 | 12 | 148  | 154 | 20 |      |  |  |     |  |  |       |  |  |      |  |  |      |  |  |     |  |  |
| 9     | 3 | 11 | 0    | 3   | 1  | 7    | 6 | 11 | 134 | 115 | 18  | 12    | 1 | 12 | 91   | 75  | 91 | 3    | 4 | 12 | 206 | 211 | 23 | -3    | 8 | 12 | 53   | 6   | 53 |      |  |  |     |  |  |       |  |  |      |  |  |      |  |  |     |  |  |
| 10    | 3 | 11 | 156  | 93  | 28 | 8    | 6 | 11 | 100 | 55  | 40  | -20   | 2 | 12 | 114  | 50  | 34 | 4    | 4 | 12 | 122 | 117 | 37 | -2    | 8 | 12 | 0    | 13  | 1  |      |  |  |     |  |  |       |  |  |      |  |  |      |  |  |     |  |  |
| 11    | 3 | 11 | 167  | 179 | 28 | -14  | 7 | 11 | 34  | 124 | 34  | -19   | 2 | 12 | 166  | 162 | 14 | 5    | 4 | 12 | 93  | 78  | 43 | -1    | 8 | 12 | 167  | 170 | 15 |      |  |  |     |  |  |       |  |  |      |  |  |      |  |  |     |  |  |
| 12    | 3 | 11 | 138  | 19  | 52 | -13  | 7 | 11 | 156 | 151 | 31  | -18   | 2 | 12 | 73   | 117 | 28 | 6    | 4 | 12 | 54  | 51  | 54 | 0     | 8 | 12 | 42   | 45  | 41 |      |  |  |     |  |  |       |  |  |      |  |  |      |  |  |     |  |  |
| -19   | 4 | 11 | 43   | 25  | 43 | -12  | 7 | 11 | 79  | 67  | 78  | -17   | 2 | 12 | 0    | 83  | 1  | 7    | 4 | 12 | 97  | 116 | 26 | 1     | 8 | 12 | 93   | 101 | 46 |      |  |  |     |  |  |       |  |  |      |  |  |      |  |  |     |  |  |
| -18   | 4 | 11 | 271  | 273 | 12 | -11  | 7 | 11 | 37  | 8   | 36  | -16   | 2 | 12 | 235  | 245 | 12 | 8    | 4 | 12 | 41  | 23  | 40 | 2     | 8 | 12 | 76   | 18  | 75 |      |  |  |     |  |  |       |  |  |      |  |  |      |  |  |     |  |  |
| -17   | 4 | 11 | 78   | 72  | 32 | -10  | 7 | 11 | 142 | 156 | 21  | -15   | 2 | 12 | 92   | 116 | 14 | 9    | 4 | 12 | 0   | 9   | 1  | -21   | 0 | 13 | 86   | 63  | 49 |      |  |  |     |  |  |       |  |  |      |  |  |      |  |  |     |  |  |
| -16   | 4 | 11 | 263  | 268 | 14 | -9   | 7 | 11 | 77  | 92  | 42  | -14   | 2 | 12 | 148  | 159 | 10 | 10   | 4 | 12 | 108 | 71  | 28 | -19   | 0 | 13 | 98   | 8   | 27 |      |  |  |     |  |  |       |  |  |      |  |  |      |  |  |     |  |  |
| -15   | 4 | 11 | 90   | 98  | 25 | -8   | 7 | 11 | 340 | 332 | 11  | -13   | 2 | 12 | 64   | 67  | 13 | -18  | 5 | 12 | 143 | 74  | 42 | -17   | 0 | 13 | 163  | 147 | 12 |      |  |  |     |  |  |       |  |  |      |  |  |      |  |  |     |  |  |
| -14   | 4 | 11 | 167  | 165 | 10 | -7   | 7 | 11 | 0   | 48  | 1   | -12   | 2 | 12 | 59   | 64  | 11 | -17  | 5 | 12 | 167 | 167 | 26 | -15   | 0 | 13 | 114  | 113 | 14 |      |  |  |     |  |  |       |  |  |      |  |  |      |  |  |     |  |  |
| -13   | 4 | 11 | 148  | 138 | 11 | -6   | 7 | 11 | 152 | 149 | 27  | -11   | 2 | 12 | 658  | 654 | 7  | -16  | 5 | 12 | 11  | 10  | 11 | -13   | 0 | 13 | 220  | 218 | 13 |      |  |  |     |  |  |       |  |  |      |  |  |      |  |  |     |  |  |
| -12   | 4 | 11 | 188  | 209 | 11 | -5   | 7 | 11 | 93  | 57  | 22  | -10   | 2 | 12 | 96   | 74  | 8  | -15  | 5 | 12 | 0   | 41  | 1  | -11   | 0 | 13 | 363  | 352 | 16 |      |  |  |     |  |  |       |  |  |      |  |  |      |  |  |     |  |  |
| -11   | 4 | 11 | 67   | 72  | 18 | -4   | 7 | 11 | 318 | 294 | 18  | -9    | 2 | 12 | 170  | 165 | 6  | -14  | 5 | 12 | 57  | 74  | 56 | -9    | 0 | 13 | 694  | 687 | 19 |      |  |  |     |  |  |       |  |  |      |  |  |      |  |  |     |  |  |
| -10   | 4 | 11 | 384  | 380 | 6  | -3   | 7 | 11 | 83  | 67  | 33  | -8    | 2 | 12 | 234  | 234 | 8  | -13  | 5 | 12 | 217 | 201 | 14 | -7    | 0 | 13 | 157  | 163 | 7  |      |  |  |     |  |  |       |  |  |      |  |  |      |  |  |     |  |  |
| -9    | 4 | 11 | 194  | 191 | 14 | -2   | 7 | 11 | 292 | 283 | 14  | -7    | 2 | 12 | 737  | 728 | 9  | -12  | 5 | 12 | 424 | 426 | 10 | -5    | 0 | 13 | 354  | 370 | 5  |      |  |  |     |  |  |       |  |  |      |  |  |      |  |  |     |  |  |
| -8    | 4 | 11 | 86   | 103 | 9  | -1   | 7 | 11 | 0   | 39  | 1   | -6    | 2 | 12 | 300  | 307 | 7  | -11  | 5 | 12 | 117 | 150 | 17 | -3    | 0 | 13 | 111  | 112 | 10 |      |  |  |     |  |  |       |  |  |      |  |  |      |  |  |     |  |  |
| -7    | 4 | 11 | 462  | 447 | 12 | 0    | 7 | 11 | 84  | 55  | 28  | -5    | 2 | 12 | 256  | 258 | 4  | -10  | 5 | 12 | 271 | 281 | 16 | -1    | 0 | 13 | 31   | 14  | 31 |      |  |  |     |  |  |       |  |  |      |  |  |      |  |  |     |  |  |
| -6    | 4 | 11 | 597  | 604 | 10 | 1    | 7 | 11 | 61  | 78  | 52  | -4    | 2 | 12 | 232  | 242 | 6  | -9   | 5 | 12 | 184 | 178 | 10 | 1     | 0 | 13 | 144  | 138 | 14 |      |  |  |     |  |  |       |  |  |      |  |  |      |  |  |     |  |  |
| -5    | 4 | 11 | 0    | 49  | 1  | 2    | 7 | 11 | 104 | 75  | 24  | -3    | 2 | 12 | 323  | 315 | 4  | -8   | 5 | 12 | 372 | 371 | 9  | 3     | 0 | 13 | 327  | 313 | 9  |      |  |  |     |  |  |       |  |  |      |  |  |      |  |  |     |  |  |
| -4    | 4 | 11 | 168  | 164 | 4  | 3    | 7 | 11 | 96  | 76  | 68  | -2    | 2 | 12 | 151  | 163 | 4  | -7   | 5 | 12 | 79  | 73  | 23 | 5     | 0 | 13 | 353  | 340 | 10 |      |  |  |     |  |  |       |  |  |      |  |  |      |  |  |     |  |  |
| -3    | 4 | 11 | 569  | 574 | 9  | 4    | 7 | 11 | 27  | 27  | 27  | -1    | 2 | 12 | 328  | 329 | 4  | -6   | 5 | 12 | 379 | 380 | 7  | 7     | 0 | 13 | 0    | 69  | 1  |      |  |  |     |  |  |       |  |  |      |  |  |      |  |  |     |  |  |
| -2    | 4 | 11 | 375  | 384 | 5  | 5    | 7 | 11 | 127 | 84  | 28  | 0     | 2 | 12 | 62   | 60  | 13 | -5   | 5 | 12 | 285 | 305 | 12 | 9     | 0 | 13 | 255  | 226 | 14 |      |  |  |     |  |  |       |  |  |      |  |  |      |  |  |     |  |  |
| -1    | 4 | 11 | 150  | 154 | 7  | 6    | 7 | 11 | 104 | 59  | 44  | 1     | 2 | 12 | 208  | 202 | 5  | -4   | 5 | 12 | 78  | 26  | 16 | 11    | 0 | 13 | 223  | 172 | 27 |      |  |  |     |  |  |       |  |  |      |  |  |      |  |  |     |  |  |
| 0     | 4 | 11 | 24   | 27  | 24 | -11  | 8 | 11 | 0   | 83  | 1   | 2     | 2 | 12 | 60   | 35  | 17 | -3   | 5 | 12 | 0   | 38  | 1  | -20   | 1 | 13 | 97   | 37  | 44 |      |  |  |     |  |  |       |  |  |      |  |  |      |  |  |     |  |  |
| 1     | 4 | 11 | 177  | 186 | 9  | -10  | 8 | 11 | 44  | 73  | 43  | 3     | 2 | 12 | 177  | 200 | 6  | -2   | 5 | 12 | 223 | 212 | 11 | -19   | 1 | 13 | 68   | 57  | 37 |      |  |  |     |  |  |       |  |  |      |  |  |      |  |  |     |  |  |
| 2     | 4 | 11 | 102  | 104 | 12 | -9   | 8 | 11 | 139 | 151 | 19  | 4     | 2 | 12 | 123  | 122 | 12 | -1   | 5 | 12 | 65  | 86  | 22 | -18   | 1 | 13 | 21   | 67  | 21 |      |  |  |     |  |  |       |  |  |      |  |  |      |  |  |     |  |  |
| 3     | 4 | 11 | 126  | 107 | 21 | -8   | 8 | 11 | 104 | 128 | 104 | 5     | 2 | 12 | 131  | 146 | 17 | 0    | 5 | 12 | 283 | 289 | 10 | -17   | 1 | 13 | 183  | 183 | 8  |      |  |  |     |  |  |       |  |  |      |  |  |      |  |  |     |  |  |
| 4     | 4 | 11 | 99   | 105 | 48 | -7   | 8 | 11 | 152 | 99  | 21  | 6     | 2 | 12 | 83   | 81  | 23 | 1    | 5 | 12 | 157 | 167 | 11 | -16   | 1 | 13 | 170  | 176 | 9  |      |  |  |     |  |  |       |  |  |      |  |  |      |  |  |     |  |  |
| 5     | 4 | 11 | 205  | 202 | 17 | -6   | 8 | 11 | 494 | 495 | 20  | 7     | 2 | 12 | 200  | 179 | 23 | 2    | 5 | 12 | 132 | 93  | 30 | -15   | 1 | 13 | 111  | 131 | 9  |      |  |  |     |  |  |       |  |  |      |  |  |      |  |  |     |  |  |
| 6     | 4 | 11 | 109  | 134 | 67 | -5   | 8 | 11 | 64  | 77  | 64  | 8     | 2 | 12 | 62   | 5   | 61 | 3    | 5 | 12 | 101 | 70  | 32 | -14   | 1 | 13 | 288  | 292 | 4  |      |  |  |     |  |  |       |  |  |      |  |  |      |  |  |     |  |  |
| 7     | 4 | 11 | 77   | 82  | 76 | -4   | 8 | 11 | 163 | 175 | 19  | 9     | 2 | 12 | 45   | 2   | 44 | 4    | 5 | 12 | 40  | 36  | 39 | -13   | 1 | 13 | 366  | 381 | 8  |      |  |  |     |  |  |       |  |  |      |  |  |      |  |  |     |  |  |
| 8     | 4 | 11 | 117  | 93  | 46 | -3   | 8 | 11 | 109 | 68  | 27  | 10    | 2 | 12 | 62   | 71  | 62 | 5    | 5 | 12 | 110 | 61  | 21 | -12   | 1 | 13 | 280  | 285 | 6  |      |  |  |     |  |  |       |  |  |      |  |  |      |  |  |     |  |  |
| 9     | 4 | 11 | 117  | 91  | 27 | -2   | 8 | 11 | 232 | 220 | 12  | 11    | 2 | 12 | 177  | 169 | 22 | 6    | 5 | 12 | 134 | 134 | 16 | -11   | 1 | 13 | 232  | 240 | 4  |      |  |  |     |  |  |       |  |  |      |  |  |      |  |  |     |  |  |
| 10    | 4 | 11 | 66   | 34  | 66 | -1   | 8 | 11 | 257 | 251 | 13  | 12    | 2 | 12 | 49   | 43  | 48 | 7    | 5 | 12 | 0   | 43  | 1  | -10   | 1 | 13 | 99   | 106 | 8  |      |  |  |     |  |  |       |  |  |      |  |  |      |  |  |     |  |  |
| 11    | 4 | 11 | 97   | 33  | 56 | 0    | 8 | 11 | 167 | 165 | 18  | -20   | 3 | 12 | 140  | 123 | 23 | 8    | 5 | 12 | 147 | 147 | 18 | -9    | 1 | 13 | 133  | 134 | 6  |      |  |  |     |  |  |       |  |  |      |  |  |      |  |  |     |  |  |
| -18   | 5 | 11 | 175  | 141 | 21 | 1    | 8 | 11 | 73  | 51  | 55  | -19   | 3 | 12 | 96   | 30  | 83 | 9    | 5 | 12 | 0   | 73  | 1  | -8    | 1 | 13 | 268  | 278 | 4  |      |  |  |     |  |  |       |  |  |      |  |  |      |  |  |     |  |  |
| -17   | 5 | 11 | 234  | 233 | 12 | 2    | 8 | 11 | 0   | 96  | 1   | -18   | 3 | 12 | 261  | 273 | 11 | -16  | 6 | 12 | 39  | 73  | 38 | -7    | 1 | 13 | 123  | 128 | 5  |      |  |  |     |  |  |       |  |  |      |  |  |      |  |  |     |  |  |
| -16   | 5 | 11 | 50   | 89  | 49 | 3    | 8 | 11 | 13  |     |     |       |   |    |      |     |    |      |   |    |     |     |    |       |   |    |      |     |    |      |  |  |     |  |  |       |  |  |      |  |  |      |  |  |     |  |  |

Table 7. Observed and calculated structure factors for 3a  
Page 9

| h   | k | l  | 10Fo | 10Fc | 10s | h   | k | l  | 10Fo | 10Fc | 10s | h   | k | l  | 10Fo | 10Fc | 10s | h   | k | l  | 10Fo | 10Fc | 10s | h   | k | l  | 10Fo | 10Fc | 10s |
|-----|---|----|------|------|-----|-----|---|----|------|------|-----|-----|---|----|------|------|-----|-----|---|----|------|------|-----|-----|---|----|------|------|-----|
| -8  | 2 | 13 | 158  | 165  | 5   | -9  | 5 | 13 | 138  | 121  | 14  | -18 | 1 | 14 | 81   | 51   | 23  | 8   | 3 | 14 | 31   | 101  | 30  | 0   | 7 | 14 | 110  | 98   | 38  |
| -7  | 2 | 13 | 243  | 256  | 5   | -8  | 5 | 13 | 50   | 18   | 49  | -17 | 1 | 14 | 110  | 113  | 13  | 9   | 3 | 14 | 157  | 146  | 26  | 1   | 7 | 14 | 169  | 177  | 33  |
| -6  | 2 | 13 | 671  | 683  | 11  | -7  | 5 | 13 | 357  | 352  | 13  | -16 | 1 | 14 | 0    | 15   | 1   | -18 | 4 | 14 | 67   | 28   | 67  | 2   | 7 | 14 | 101  | 91   | 28  |
| -5  | 2 | 13 | 78   | 71   | 9   | -6  | 5 | 13 | 141  | 151  | 15  | -15 | 1 | 14 | 444  | 434  | 9   | -17 | 4 | 14 | 29   | 44   | 28  | 3   | 7 | 14 | 51   | 95   | 51  |
| -4  | 2 | 13 | 275  | 293  | 4   | -5  | 5 | 13 | 545  | 555  | 15  | -14 | 1 | 14 | 34   | 47   | 33  | -16 | 4 | 14 | 120  | 123  | 19  | -7  | 8 | 14 | 206  | 176  | 31  |
| -3  | 2 | 13 | 363  | 367  | 4   | -4  | 5 | 13 | 0    | 73   | 1   | -13 | 1 | 14 | 312  | 317  | 5   | -15 | 4 | 14 | 268  | 267  | 10  | -6  | 8 | 14 | 0    | 41   | 1   |
| -2  | 2 | 13 | 487  | 478  | 5   | -3  | 5 | 13 | 85   | 15   | 22  | -12 | 1 | 14 | 279  | 282  | 4   | -14 | 4 | 14 | 0    | 26   | 1   | -5  | 8 | 14 | 120  | 90   | 32  |
| -1  | 2 | 13 | 0    | 38   | 1   | -2  | 5 | 13 | 59   | 15   | 34  | -11 | 1 | 14 | 314  | 317  | 6   | -13 | 4 | 14 | 17   | 26   | 17  | -4  | 8 | 14 | 18   | 12   | 18  |
| 0   | 2 | 13 | 226  | 230  | 5   | -1  | 5 | 13 | 362  | 369  | 24  | -10 | 1 | 14 | 180  | 184  | 6   | -12 | 4 | 14 | 118  | 126  | 18  | -3  | 8 | 14 | 108  | 130  | 33  |
| 1   | 2 | 13 | 188  | 200  | 7   | 0   | 5 | 13 | 112  | 56   | 51  | -9  | 1 | 14 | 358  | 375  | 6   | -11 | 4 | 14 | 0    | 29   | 1   | -2  | 8 | 14 | 0    | 52   | 1   |
| 2   | 2 | 13 | 126  | 132  | 10  | 1   | 5 | 13 | 121  | 85   | 20  | -8  | 1 | 14 | 130  | 141  | 10  | -10 | 4 | 14 | 285  | 274  | 13  | -19 | 0 | 15 | 48   | 24   | 48  |
| 3   | 2 | 13 | 32   | 87   | 32  | 2   | 5 | 13 | 88   | 117  | 32  | -7  | 1 | 14 | 301  | 305  | 5   | -9  | 4 | 14 | 56   | 97   | 45  | -17 | 0 | 15 | 495  | 491  | 28  |
| 4   | 2 | 13 | 92   | 91   | 11  | 3   | 5 | 13 | 250  | 264  | 11  | -6  | 1 | 14 | 584  | 586  | 7   | -8  | 4 | 14 | 268  | 270  | 12  | -15 | 0 | 15 | 459  | 444  | 10  |
| 5   | 2 | 13 | 81   | 104  | 22  | 4   | 5 | 13 | 100  | 103  | 19  | -5  | 1 | 14 | 204  | 208  | 4   | -7  | 4 | 14 | 550  | 529  | 15  | -13 | 0 | 15 | 190  | 183  | 9   |
| 6   | 2 | 13 | 192  | 157  | 43  | 5   | 5 | 13 | 151  | 162  | 15  | -4  | 1 | 14 | 110  | 113  | 10  | -6  | 4 | 14 | 133  | 146  | 8   | -11 | 0 | 15 | 391  | 381  | 9   |
| 7   | 2 | 13 | 101  | 98   | 28  | 6   | 5 | 13 | 117  | 62   | 22  | -3  | 1 | 14 | 76   | 64   | 9   | -5  | 4 | 14 | 314  | 320  | 12  | -9  | 0 | 15 | 61   | 80   | 31  |
| 8   | 2 | 13 | 85   | 88   | 47  | 7   | 5 | 13 | 0    | 12   | 1   | -2  | 1 | 14 | 310  | 318  | 12  | -4  | 4 | 14 | 321  | 309  | 19  | -7  | 0 | 15 | 50   | 2    | 49  |
| 9   | 2 | 13 | 95   | 53   | 22  | 8   | 5 | 13 | 86   | 7    | 85  | -1  | 1 | 14 | 79   | 96   | 11  | -3  | 4 | 14 | 271  | 264  | 17  | -5  | 0 | 15 | 0    | 45   | 1   |
| 10  | 2 | 13 | 101  | 104  | 45  | -16 | 6 | 13 | 92   | 110  | 50  | 0   | 1 | 14 | 178  | 167  | 7   | -2  | 4 | 14 | 242  | 252  | 18  | -3  | 0 | 15 | 428  | 428  | 19  |
| 11  | 2 | 13 | 160  | 148  | 26  | -15 | 6 | 13 | 157  | 134  | 33  | 1   | 1 | 14 | 59   | 49   | 22  | -1  | 4 | 14 | 35   | 71   | 34  | -1  | 0 | 15 | 421  | 415  | 24  |
| -19 | 3 | 13 | 0    | 5    | 1   | -14 | 6 | 13 | 0    | 29   | 1   | 2   | 1 | 14 | 79   | 81   | 15  | 0   | 4 | 14 | 329  | 321  | 9   | 1   | 0 | 15 | 557  | 533  | 11  |
| -18 | 3 | 13 | 0    | 36   | 1   | -13 | 6 | 13 | 67   | 112  | 67  | 3   | 1 | 14 | 348  | 337  | 11  | 1   | 4 | 14 | 118  | 122  | 13  | 3   | 0 | 15 | 430  | 434  | 14  |
| -17 | 3 | 13 | 127  | 122  | 16  | -12 | 6 | 13 | 335  | 315  | 12  | 4   | 1 | 14 | 198  | 189  | 9   | 2   | 4 | 14 | 228  | 222  | 10  | 5   | 0 | 15 | 63   | 34   | 46  |
| -16 | 3 | 13 | 229  | 229  | 9   | -11 | 6 | 13 | 141  | 146  | 45  | 5   | 1 | 14 | 201  | 204  | 7   | 3   | 4 | 14 | 0    | 29   | 1   | 7   | 0 | 15 | 18   | 10   | 18  |
| -15 | 3 | 13 | 56   | 74   | 30  | -10 | 6 | 13 | 135  | 158  | 14  | 6   | 1 | 14 | 95   | 80   | 26  | 4   | 4 | 14 | 67   | 33   | 42  | 9   | 0 | 15 | 125  | 79   | 38  |
| -14 | 3 | 13 | 305  | 285  | 7   | -9  | 6 | 13 | 186  | 175  | 12  | 7   | 1 | 14 | 151  | 140  | 17  | 5   | 4 | 14 | 121  | 127  | 20  | -20 | 1 | 15 | 0    | 21   | 1   |
| -13 | 3 | 13 | 138  | 146  | 8   | -8  | 6 | 13 | 216  | 223  | 12  | 8   | 1 | 14 | 129  | 79   | 16  | 6   | 4 | 14 | 0    | 56   | 1   | -19 | 1 | 15 | 215  | 201  | 11  |
| -12 | 3 | 13 | 75   | 65   | 13  | -7  | 6 | 13 | 120  | 105  | 21  | 9   | 1 | 14 | 52   | 78   | 51  | 7   | 4 | 14 | 116  | 64   | 27  | -18 | 1 | 15 | 58   | 65   | 34  |
| -11 | 3 | 13 | 251  | 236  | 4   | -6  | 6 | 13 | 299  | 276  | 9   | 10  | 1 | 14 | 43   | 48   | 42  | 8   | 4 | 14 | 142  | 117  | 24  | -17 | 1 | 15 | 247  | 249  | 7   |
| -10 | 3 | 13 | 551  | 542  | 8   | -5  | 6 | 13 | 141  | 158  | 16  | -20 | 2 | 14 | 91   | 21   | 91  | -17 | 5 | 14 | 0    | 41   | 1   | -16 | 1 | 15 | 85   | 92   | 18  |
| -9  | 3 | 13 | 0    | 6    | 1   | -4  | 6 | 13 | 0    | 14   | 1   | -19 | 2 | 14 | 82   | 50   | 41  | -16 | 5 | 14 | 10   | 87   | 9   | -15 | 1 | 15 | 149  | 142  | 9   |
| -8  | 3 | 13 | 99   | 105  | 7   | -3  | 6 | 13 | 140  | 132  | 16  | -18 | 2 | 14 | 77   | 82   | 25  | -15 | 5 | 14 | 97   | 115  | 19  | -14 | 1 | 15 | 0    | 44   | 1   |
| -7  | 3 | 13 | 225  | 221  | 6   | -2  | 6 | 13 | 95   | 93   | 19  | -17 | 2 | 14 | 194  | 184  | 9   | -14 | 5 | 14 | 214  | 210  | 12  | -13 | 1 | 15 | 358  | 357  | 8   |
| -6  | 3 | 13 | 282  | 301  | 6   | -1  | 6 | 13 | 160  | 147  | 12  | -16 | 2 | 14 | 35   | 36   | 34  | -13 | 5 | 14 | 101  | 94   | 25  | -12 | 1 | 15 | 22   | 37   | 22  |
| -5  | 3 | 13 | 157  | 164  | 5   | 0   | 6 | 13 | 96   | 84   | 63  | -15 | 2 | 14 | 75   | 50   | 19  | -12 | 5 | 14 | 146  | 185  | 19  | -11 | 1 | 15 | 60   | 72   | 29  |
| -4  | 3 | 13 | 227  | 239  | 4   | 1   | 6 | 13 | 82   | 61   | 37  | -14 | 2 | 14 | 159  | 165  | 12  | -11 | 5 | 14 | 126  | 86   | 39  | -10 | 1 | 15 | 338  | 333  | 7   |
| -3  | 3 | 13 | 32   | 38   | 32  | 2   | 6 | 13 | 146  | 138  | 19  | -13 | 2 | 14 | 484  | 472  | 8   | -10 | 5 | 14 | 194  | 178  | 21  | -9  | 1 | 15 | 344  | 343  | 5   |
| -2  | 3 | 13 | 328  | 329  | 6   | 3   | 6 | 13 | 91   | 120  | 44  | -12 | 2 | 14 | 34   | 25   | 33  | -9  | 5 | 14 | 132  | 66   | 19  | -8  | 1 | 15 | 530  | 536  | 7   |
| -1  | 3 | 13 | 63   | 63   | 40  | 4   | 6 | 13 | 0    | 20   | 1   | -11 | 2 | 14 | 442  | 440  | 6   | -8  | 5 | 14 | 347  | 344  | 9   | -7  | 1 | 15 | 214  | 212  | 5   |
| 0   | 3 | 13 | 0    | 40   | 1   | 5   | 6 | 13 | 119  | 105  | 42  | -10 | 2 | 14 | 225  | 229  | 5   | -7  | 5 | 14 | 132  | 135  | 9   | -6  | 1 | 15 | 301  | 295  | 6   |
| 1   | 3 | 13 | 314  | 310  | 26  | 6   | 6 | 13 | 101  | 74   | 45  | -9  | 2 | 14 | 289  | 287  | 5   | -6  | 5 | 14 | 47   | 45   | 47  | -5  | 1 | 15 | 102  | 116  | 10  |
| 2   | 3 | 13 | 218  | 212  | 6   | -13 | 7 | 13 | 69   | 25   | 69  | -8  | 2 | 14 | 204  | 203  | 5   | -5  | 5 | 14 | 151  | 167  | 12  | -4  | 1 | 15 | 731  | 740  | 20  |
| 3   | 3 | 13 | 74   | 67   | 21  | -12 | 7 | 13 | 0    | 52   | 1   | -7  | 2 | 14 | 324  | 315  | 8   | -4  | 5 | 14 | 85   | 71   | 23  | -3  | 1 | 15 | 406  | 402  | 24  |
| 4   | 3 | 13 | 150  | 132  | 48  | -11 | 7 | 13 | 98   | 58   | 37  | -6  | 2 | 14 | 438  | 448  | 9   | -3  | 5 | 14 | 181  | 165  | 9   | -2  | 1 | 15 | 103  | 90   | 9   |
| 5   | 3 | 13 | 235  | 228  | 10  | -10 | 7 | 13 | 328  | 311  | 13  | -5  | 2 | 14 | 21   | 34   | 20  | -2  | 5 | 14 | 221  | 222  | 12  | -1  | 1 | 15 | 445  | 436  | 10  |
| 6   | 3 | 13 | 98   | 72   | 97  | -9  | 7 | 13 | 74   | 133  | 55  | -4  | 2 | 14 | 107  | 110  | 6   | -1  | 5 | 14 | 140  | 144  | 20  | 0   | 1 | 15 | 34   | 18   | 34  |
| 7   | 3 | 13 | 126  | 73   | 23  | -8  | 7 | 13 | 143  | 161  | 21  | -3  | 2 | 14 | 43   | 25   | 20  | 0   | 5 | 14 | 373  | 356  | 17  | 1   | 1 | 15 | 79   | 27   | 53  |
| 8   | 3 | 13 | 124  | 121  | 28  | -7  | 7 | 13 | 55   | 119  | 54  | -2  | 2 | 14 | 0    | 18   | 1   | 1   | 5 | 14 | 229  | 198  | 11  | 2   | 1 | 15 | 65   | 66   | 22  |
| 9   | 3 | 13 | 72   | 14   | 71  | -6  | 7 | 13 | 197  | 170  | 13  | -1  | 2 | 14 | 330  | 330  | 8   | 2   | 5 | 14 | 65   | 52   | 65  | 3   | 1 | 15 | 147  | 141  | 12  |
| 10  | 3 | 13 | 168  | 72   | 29  | -5  | 7 | 13 | 115  | 123  | 20  | 0   | 2 | 14 | 253  | 257  | 8   | 3   | 5 | 14 | 259  | 279  | 13  | 4   | 1 | 15 | 110  | 71   | 12  |
| -19 | 4 | 13 | 80   | 30   | 80  | -4  | 7 | 13 | 243  | 244  | 16  | 1   | 2 | 14 | 379  | 361  | 7   | 4   | 5 | 14 | 58   | 28   | 57  | 5   | 1 | 15 | 139  | 109  | 14  |
| -18 | 4 | 13 | 115  | 11   | 42  | -3  | 7 | 13 | 78   | 16   | 46  | 2   | 2 | 14 | 128  | 114  | 10  | 5   | 5 | 14 | 0    | 19   | 1   | 6   | 1 | 15 | 0    | 12   | 1   |
| -17 | 4 | 13 | 164  | 147  | 13  | -2  | 7 | 13 | 58   | 54   | 58  | 3   | 2 | 14 | 0    | 38   | 1   | 6   | 5 | 14 | 66   | 64   | 66  | 7   | 1 | 15 | 95   | 98   | 23  |
| -16 | 4 | 13 | 40   | 24   | 39  | -1  | 7 | 13 | 90   | 78   | 35  | 4   | 2 | 14 | 62   | 88   | 43  | 7   | 5 | 14 | 122  | 98   | 104 | 8   | 1 | 15 | 192  | 136  | 50  |
| -15 | 4 | 13 | 181  | 159  | 18  | 0   | 7 | 13 | 202  | 213  | 15  | 5   | 2 | 14 | 122  | 121  | 21  | -15 | 6 | 14 | 60   | 5    | 59  | 9   | 1 | 15 | 0    | 16   | 1   |
| -14 | 4 | 13 | 112  | 107  | 31  | 1   | 7 | 13 | 85   | 113  | 42  | 6   | 2 | 14 | 58   | 55   | 58  | -14 | 6 | 14 | 240  | 230  | 28  | -20 | 2 | 15 | 0    | 106  | 1   |
| -13 | 4 | 13 | 91   | 59   | 29  | 2   | 7 | 13 | 162  | 122  | 28  | 7   | 2 | 14 | 86   | 47   | 85  | -13 | 6 | 14 | 66   | 70   | 65  | -19 | 2 | 15 | 103  | 78   | 35  |
| -12 | 4 | 13 | 220  | 206  | 19  | 3   | 7 | 13 | 37   | 23   | 36  |     |   |    |      |      |     |     |   |    |      |      |     |     |   |    |      |      |     |

Table 7. Observed and calculated structure factors for 3a  
Page 10

| h   | k | l  | 10Fo | 10Fc | 10s | h   | k | l  | 10Fo | 10Fc | 10s | h   | k | l    | 10Fo | 10Fc | 10s | h   | k | l  | 10Fo | 10Fc | 10s | h   | k | l  | 10Fo | 10Fc | 10s |
|-----|---|----|------|------|-----|-----|---|----|------|------|-----|-----|---|------|------|------|-----|-----|---|----|------|------|-----|-----|---|----|------|------|-----|
| -16 | 3 | 15 | 181  | 190  | 19  | -3  | 6 | 15 | 0    | 72   | 1   | 2   | 2 | 16   | 54   | 77   | 53  | -8  | 6 | 16 | 0    | 7    | 1   | 5   | 2 | 17 | 116  | 38   | 41  |
| -15 | 3 | 15 | 136  | 149  | 34  | -2  | 6 | 15 | 142  | 119  | 18  | 3   | 2 | 16   | 165  | 163  | 15  | -7  | 6 | 16 | 194  | 189  | 11  | 6   | 2 | 17 | 45   | 42   | 44  |
| -14 | 3 | 15 | 212  | 207  | 10  | -1  | 6 | 15 | 197  | 179  | 12  | 4   | 2 | 16   | 116  | 112  | 17  | -6  | 6 | 16 | 18   | 27   | 17  | 7   | 2 | 17 | 88   | 37   | 39  |
| -13 | 3 | 15 | 249  | 257  | 9   | 0   | 6 | 15 | 0    | 19   | 1   | 5   | 2 | 16   | 103  | 11   | 47  | -5  | 6 | 16 | 135  | 101  | 29  | -18 | 3 | 17 | 169  | 153  | 22  |
| -12 | 3 | 15 | 295  | 283  | 6   | 1   | 6 | 15 | 166  | 133  | 18  | 6   | 2 | 16   | 0    | 33   | 1   | -4  | 6 | 16 | 133  | 114  | 20  | -17 | 3 | 17 | 0    | 50   | 1   |
| -11 | 3 | 15 | 100  | 78   | 14  | 2   | 6 | 15 | 64   | 20   | 63  | 7   | 2 | 16   | 58   | 3    | 57  | -3  | 6 | 16 | 24   | 71   | 24  | -16 | 3 | 17 | 207  | 209  | 13  |
| -10 | 3 | 15 | 449  | 435  | 10  | 3   | 6 | 15 | 39   | 38   | 38  | 8   | 2 | 16   | 0    | 51   | 1   | -2  | 6 | 16 | 53   | 35   | 52  | -15 | 3 | 17 | 106  | 105  | 23  |
| -9  | 3 | 15 | 19   | 53   | 19  | 4   | 6 | 15 | 110  | 32   | 62  | -19 | 3 | 16   | 0    | 53   | 1   | -1  | 6 | 16 | 86   | 105  | 32  | -14 | 3 | 17 | 84   | 63   | 37  |
| -8  | 3 | 15 | 90   | 98   | 11  | -12 | 7 | 15 | 180  | 139  | 29  | -18 | 3 | 16   | 106  | 73   | 36  | 0   | 6 | 16 | 157  | 148  | 32  | -13 | 3 | 17 | 19   | 27   | 18  |
| -7  | 3 | 15 | 273  | 288  | 6   | -11 | 7 | 15 | 0    | 25   | 1   | -17 | 3 | 16   | 172  | 177  | 16  | 1   | 6 | 16 | 0    | 56   | 1   | -12 | 3 | 17 | 210  | 203  | 11  |
| -6  | 3 | 15 | 120  | 112  | 8   | -10 | 7 | 15 | 159  | 167  | 19  | -16 | 3 | 16   | 160  | 152  | 15  | 2   | 6 | 16 | 155  | 112  | 28  | -11 | 3 | 17 | 84   | 25   | 20  |
| -5  | 3 | 15 | 233  | 244  | 5   | -9  | 7 | 15 | 129  | 165  | 22  | -15 | 3 | 16   | 181  | 134  | 30  | 3   | 6 | 16 | 0    | 6    | 1   | -10 | 3 | 17 | 197  | 191  | 13  |
| -4  | 3 | 15 | 231  | 232  | 6   | -8  | 7 | 15 | 115  | 86   | 30  | -14 | 3 | 16   | 0    | 15   | 1   | -10 | 7 | 16 | 6    | 43   | 6   | -9  | 3 | 17 | 52   | 25   | 51  |
| -3  | 3 | 15 | 93   | 100  | 10  | -7  | 7 | 15 | 0    | 11   | 1   | -13 | 3 | 16   | 122  | 98   | 18  | -9  | 7 | 16 | 258  | 269  | 15  | -8  | 3 | 17 | 21   | 36   | 20  |
| -2  | 3 | 15 | 212  | 203  | 6   | -6  | 7 | 15 | 52   | 23   | 51  | -12 | 3 | 16   | 152  | 173  | 14  | -8  | 7 | 16 | 51   | 88   | 50  | -7  | 3 | 17 | 168  | 152  | 14  |
| -1  | 3 | 15 | 273  | 287  | 9   | -5  | 7 | 15 | 78   | 36   | 47  | -11 | 3 | 16   | 268  | 255  | 8   | -7  | 7 | 16 | 142  | 127  | 25  | -6  | 3 | 17 | 214  | 210  | 7   |
| 0   | 3 | 15 | 200  | 207  | 11  | -4  | 7 | 15 | 135  | 77   | 23  | -10 | 3 | 16   | 0    | 22   | 1   | -6  | 7 | 16 | 89   | 59   | 48  | -5  | 3 | 17 | 231  | 222  | 16  |
| 1   | 3 | 15 | 90   | 104  | 18  | -3  | 7 | 15 | 0    | 40   | 1   | -9  | 3 | 16   | 272  | 266  | 8   | -5  | 7 | 16 | 226  | 219  | 14  | -4  | 3 | 17 | 366  | 361  | 8   |
| 2   | 3 | 15 | 100  | 107  | 21  | -2  | 7 | 15 | 247  | 242  | 22  | -8  | 3 | 16   | 217  | 203  | 10  | -4  | 7 | 16 | 94   | 95   | 53  | -3  | 3 | 17 | 190  | 189  | 8   |
| 3   | 3 | 15 | 66   | 60   | 46  | -1  | 7 | 15 | 157  | 125  | 16  | -7  | 3 | 16   | 72   | 85   | 26  | -3  | 7 | 16 | 0    | 29   | 1   | -2  | 3 | 17 | 66   | 22   | 25  |
| 4   | 3 | 15 | 0    | 8    | 1   | 0   | 7 | 15 | 64   | 19   | 63  | -6  | 3 | 16   | 128  | 129  | 26  | -2  | 7 | 16 | 0    | 26   | 1   | -1  | 3 | 17 | 61   | 70   | 30  |
| 5   | 3 | 15 | 0    | 48   | 1   | 1   | 7 | 15 | 69   | 13   | 69  | -5  | 3 | 16   | 277  | 269  | 6   | -1  | 7 | 16 | 0    | 50   | 1   | 0   | 3 | 17 | 80   | 79   | 60  |
| 6   | 3 | 15 | 58   | 50   | 58  | -20 | 0 | 16 | 117  | 5    | 31  | -4  | 3 | 16   | 0    | 40   | 1   | -19 | 0 | 17 | 49   | 51   | 48  | 1   | 3 | 17 | 153  | 154  | 14  |
| 7   | 3 | 15 | 78   | 71   | 78  | -18 | 0 | 16 | 110  | 26   | 31  | -3  | 3 | 16   | 152  | 146  | 8   | -17 | 0 | 17 | 0    | 56   | 1   | 2   | 3 | 17 | 63   | 15   | 39  |
| 8   | 3 | 15 | 143  | 67   | 40  | -16 | 0 | 16 | 113  | 99   | 18  | -2  | 3 | 16   | 43   | 17   | 43  | -15 | 0 | 17 | 0    | 36   | 1   | 3   | 3 | 17 | 0    | 31   | 1   |
| -18 | 4 | 15 | 198  | 176  | 15  | -14 | 0 | 16 | 153  | 127  | 10  | -1  | 3 | 16   | 88   | 35   | 25  | -13 | 0 | 17 | 240  | 261  | 8   | 4   | 3 | 17 | 115  | 97   | 43  |
| -17 | 4 | 15 | 146  | 141  | 19  | -12 | 0 | 16 | 20   | 50   | 19  | 0   | 3 | 16   | 156  | 142  | 31  | -11 | 0 | 17 | 147  | 144  | 13  | 5   | 3 | 17 | 74   | 62   | 73  |
| -16 | 4 | 15 | 0    | 38   | 1   | -10 | 0 | 16 | 530  | 548  | 16  | 1   | 3 | 16   | 173  | 161  | 13  | -9  | 0 | 17 | 234  | 233  | 17  | 6   | 3 | 17 | 101  | 46   | 40  |
| -15 | 4 | 15 | 272  | 246  | 14  | -8  | 0 | 16 | 180  | 181  | 41  | 2   | 3 | 16   | 0    | 15   | 1   | -7  | 0 | 17 | 52   | 46   | 52  | -17 | 4 | 17 | 194  | 141  | 40  |
| -14 | 4 | 15 | 326  | 309  | 10  | -6  | 0 | 16 | 453  | 439  | 22  | 3   | 3 | 16   | 126  | 91   | 21  | -5  | 0 | 17 | 473  | 456  | 24  | -16 | 4 | 17 | 71   | 79   | 58  |
| -13 | 4 | 15 | 58   | 23   | 57  | -4  | 0 | 16 | 0    | 42   | 1   | 4   | 3 | 16   | 205  | 190  | 15  | -3  | 0 | 17 | 0    | 55   | 1   | -15 | 4 | 17 | 0    | 55   | 1   |
| -12 | 4 | 15 | 128  | 149  | 20  | -2  | 0 | 16 | 0    | 13   | 1   | 5   | 3 | 16   | 0    | 52   | 1   | -1  | 0 | 17 | 236  | 179  | 14  | -14 | 4 | 17 | 55   | 65   | 54  |
| -11 | 4 | 15 | 119  | 100  | 33  | 0   | 0 | 16 | 119  | 130  | 16  | 6   | 3 | 16   | 83   | 66   | 65  | 1   | 0 | 17 | 37   | 49   | 37  | -13 | 4 | 17 | 22   | 36   | 21  |
| -10 | 4 | 15 | 139  | 152  | 16  | 2   | 0 | 16 | 270  | 272  | 17  | 7   | 3 | 16   | 101  | 34   | 71  | 3   | 0 | 17 | 252  | 265  | 11  | -12 | 4 | 17 | 108  | 119  | 20  |
| -9  | 4 | 15 | 199  | 203  | 9   | 4   | 0 | 16 | 56   | 75   | 56  | -18 | 4 | 16   | 66   | 57   | 65  | 5   | 0 | 17 | 30   | 103  | 29  | -11 | 4 | 17 | 191  | 176  | 11  |
| -8  | 4 | 15 | 14   | 35   | 14  | 6   | 0 | 16 | 208  | 222  | 11  | -17 | 4 | 16   | 76   | 4    | 40  | 7   | 0 | 17 | 71   | 36   | 71  | -10 | 4 | 17 | 61   | 28   | 60  |
| -7  | 4 | 15 | 61   | 79   | 60  | 8   | 0 | 16 | 208  | 126  | 30  | -16 | 4 | 16   | 139  | 128  | 25  | -19 | 1 | 17 | 0    | 62   | 1   | -9  | 4 | 17 | 261  | 290  | 11  |
| -6  | 4 | 15 | 146  | 160  | 11  | -20 | 1 | 16 | 54   | 71   | 54  | -15 | 4 | 16   | 103  | 22   | 25  | -18 | 1 | 17 | 80   | 66   | 30  | -8  | 4 | 17 | 132  | 138  | 30  |
| -5  | 4 | 15 | 155  | 146  | 11  | -19 | 1 | 16 | 60   | 32   | 60  | -14 | 4 | 16   | 197  | 222  | 12  | -17 | 1 | 17 | 116  | 117  | 20  | -7  | 4 | 17 | 0    | 74   | 1   |
| -4  | 4 | 15 | 62   | 84   | 31  | -18 | 1 | 16 | 0    | 49   | 1   | -13 | 4 | 16   | 11   | 73   | 11  | -16 | 1 | 17 | 118  | 95   | 12  | -6  | 4 | 17 | 167  | 161  | 15  |
| -3  | 4 | 15 | 312  | 313  | 15  | -17 | 1 | 16 | 152  | 106  | 12  | -12 | 4 | 16   | 83   | 104  | 82  | -15 | 1 | 17 | 199  | 190  | 12  | -5  | 4 | 17 | 242  | 232  | 9   |
| -2  | 4 | 15 | 181  | 194  | 11  | -16 | 1 | 16 | 113  | 139  | 20  | -11 | 4 | 16   | 131  | 118  | 18  | -14 | 1 | 17 | 182  | 192  | 7   | -4  | 4 | 17 | 143  | 123  | 12  |
| -1  | 4 | 15 | 55   | 56   | 55  | -15 | 1 | 16 | 0    | 18   | 1   | -10 | 4 | 16   | 286  | 294  | 14  | -13 | 1 | 17 | 189  | 207  | 6   | -3  | 4 | 17 | 188  | 170  | 15  |
| 0   | 4 | 15 | 101  | 108  | 17  | -14 | 1 | 16 | 425  | 426  | 8   | -9  | 4 | 16   | 203  | 191  | 13  | -12 | 1 | 17 | 122  | 101  | 17  | -2  | 4 | 17 | 177  | 160  | 33  |
| 1   | 4 | 15 | 346  | 362  | 16  | -13 | 1 | 16 | 48   | 83   | 42  | -8  | 4 | 16   | 100  | 89   | 18  | -11 | 1 | 17 | 0    | 57   | 1   | -1  | 4 | 17 | 77   | 50   | 31  |
| 2   | 4 | 15 | 89   | 77   | 20  | -12 | 1 | 16 | 168  | 160  | 7   | -7  | 4 | 16   | 144  | 125  | 17  | -10 | 1 | 17 | 262  | 273  | 6   | 0   | 4 | 17 | 0    | 25   | 1   |
| 3   | 4 | 15 | 107  | 111  | 28  | -11 | 1 | 16 | 156  | 171  | 8   | -6  | 4 | 16   | 203  | 199  | 8   | -9  | 1 | 17 | 174  | 178  | 10  | 1   | 4 | 17 | 124  | 99   | 24  |
| 4   | 4 | 15 | 131  | 119  | 20  | -10 | 1 | 16 | 340  | 354  | 13  | -5  | 4 | 16   | 52   | 45   | 51  | -8  | 1 | 17 | 122  | 120  | 10  | 2   | 4 | 17 | 22   | 51   | 22  |
| 5   | 4 | 15 | 85   | 98   | 28  | -9  | 1 | 16 | 0    | 22   | 1   | -4  | 4 | 16   | 96   | 112  | 30  | -7  | 1 | 17 | 152  | 139  | 9   | 3   | 4 | 17 | 56   | 39   | 55  |
| 6   | 4 | 15 | 100  | 93   | 35  | -8  | 1 | 16 | 184  | 175  | 9   | -3  | 4 | 16   | 83   | 83   | 25  | -6  | 1 | 17 | 162  | 161  | 7   | 4   | 4 | 17 | 0    | 39   | 1   |
| 7   | 4 | 15 | 46   | 29   | 45  | -7  | 1 | 16 | 201  | 216  | 10  | -2  | 4 | 16   | 115  | 87   | 14  | -5  | 1 | 17 | 323  | 347  | 11  | 5   | 4 | 17 | 56   | 16   | 56  |
| -17 | 5 | 15 | 103  | 70   | 59  | -6  | 1 | 16 | 60   | 44   | 20  | -1  | 4 | 16   | 0    | 37   | 1   | -4  | 1 | 17 | 174  | 199  | 9   | -15 | 5 | 17 | 164  | 162  | 17  |
| -16 | 5 | 15 | 95   | 78   | 37  | -5  | 1 | 16 | 295  | 295  | 6   | 0   | 4 | 16   | 56   | 43   | 55  | -3  | 1 | 17 | 63   | 48   | 25  | -14 | 5 | 17 | 110  | 143  | 35  |
| -15 | 5 | 15 | 104  | 102  | 28  | -4  | 1 | 16 | 54   | 12   | 33  | 1   | 4 | 16   | 93   | 87   | 71  | -2  | 1 | 17 | 0    | 62   | 1   | -13 | 5 | 17 | 277  | 259  | 11  |
| -14 | 5 | 15 | 83   | 115  | 72  | -3  | 1 | 16 | 565  | 569  | 32  | 2   | 4 | 16   | 159  | 154  | 14  | -1  | 1 | 17 | 284  | 270  | 6   | -12 | 5 | 17 | 0    | 12   | 1   |
| -13 | 5 | 15 | 190  | 203  | 23  | -2  | 1 | 16 | 283  | 279  | 6   | 3   | 4 | 16   | 119  | 90   | 25  | 0   | 1 | 17 | 28   | 40   | 27  | -11 | 5 | 17 | 0    | 32   | 1   |
| -12 | 5 | 15 | 187  | 204  | 14  | -1  | 1 | 16 | 407  | 407  | 11  | 4   | 4 | 16   | 80   | 97   | 37  | 1   | 1 | 17 | 0    | 20   | 1   | -10 | 5 | 17 | 31   | 102  | 30  |
| -11 | 5 | 15 | 208  | 191  | 11  | 0   | 1 | 16 | 122  | 111  | 9   | 5   | 4 | 16</ |      |      |     |     |   |    |      |      |     |     |   |    |      |      |     |

Table 7. Observed and calculated structure factors for 3a  
Page 11

| h   | k | l  | 10Fo | 10Fc | 10s | h   | k | l  | 10Fo | 10Fc | 10s  | h   | k | l  | 10Fo | 10Fc | 10s | h   | k | l  | 10Fo | 10Fc | 10s | h   | k | l  | 10Fo | 10Fc | 10s |
|-----|---|----|------|------|-----|-----|---|----|------|------|------|-----|---|----|------|------|-----|-----|---|----|------|------|-----|-----|---|----|------|------|-----|
| -7  | 7 | 17 | 0    | 1    | 1   | 1   | 3 | 18 | 167  | 179  | 19   | 1   | 1 | 19 | 61   | 15   | 60  | -7  | 6 | 19 | 128  | 13   | 79  | -7  | 4 | 20 | 61   | 118  | 60  |
| -6  | 7 | 17 | 206  | 197  | 14  | 2   | 3 | 18 | 103  | 75   | 26   | 2   | 1 | 19 | 12   | 58   | 12  | -6  | 6 | 19 | 97   | 13   | 66  | -6  | 4 | 20 | 170  | 162  | 17  |
| -5  | 7 | 17 | 128  | 24   | 32  | 3   | 3 | 18 | 0    | 8    | 1    | 3   | 1 | 19 | 0    | 8    | 1   | -5  | 6 | 19 | 34   | 111  | 33  | -5  | 4 | 20 | 41   | 8    | 41  |
| -4  | 7 | 17 | 269  | 228  | 22  | 4   | 3 | 18 | 0    | 39   | 1    | 4   | 1 | 19 | 49   | 57   | 48  | -4  | 6 | 19 | 42   | 64   | 42  | -4  | 4 | 20 | 75   | 46   | 35  |
| -18 | 0 | 18 | 254  | 236  | 20  | 5   | 3 | 18 | 33   | 5    | 32   | 5   | 1 | 19 | 96   | 84   | 95  | -18 | 0 | 20 | 444  | 434  | 26  | -3  | 4 | 20 | 162  | 131  | 19  |
| -16 | 0 | 18 | 267  | 252  | 22  | -16 | 4 | 18 | 235  | 185  | 16   | -18 | 2 | 19 | 86   | 43   | 52  | -16 | 0 | 20 | 56   | 96   | 56  | -2  | 4 | 20 | 67   | 74   | 66  |
| -14 | 0 | 18 | 27   | 4    | 27  | -15 | 4 | 18 | 207  | 235  | 15   | -17 | 2 | 19 | 95   | 71   | 94  | -14 | 0 | 20 | 113  | 83   | 20  | -1  | 4 | 20 | 114  | 5    | 29  |
| -12 | 0 | 18 | 328  | 306  | 21  | -14 | 4 | 18 | 92   | 86   | 46   | -16 | 2 | 19 | 218  | 203  | 18  | -12 | 0 | 20 | 0    | 72   | 1   | 0   | 4 | 20 | 42   | 86   | 42  |
| -10 | 0 | 18 | 136  | 140  | 14  | -13 | 4 | 18 | 153  | 164  | 13   | -15 | 2 | 19 | 9    | 12   | 9   | -10 | 0 | 20 | 50   | 41   | 50  | 1   | 4 | 20 | 101  | 83   | 37  |
| -8  | 0 | 18 | 194  | 175  | 12  | -12 | 4 | 18 | 263  | 272  | 11   | -14 | 2 | 19 | 179  | 187  | 13  | -8  | 0 | 20 | 124  | 102  | 13  | -12 | 5 | 20 | 117  | 57   | 31  |
| -6  | 0 | 18 | 72   | 65   | 28  | -11 | 4 | 18 | 177  | 144  | 11   | -13 | 2 | 19 | 133  | 139  | 15  | -6  | 0 | 20 | 148  | 128  | 16  | -11 | 5 | 20 | 72   | 24   | 71  |
| -4  | 0 | 18 | 0    | 30   | 1   | -10 | 4 | 18 | 145  | 131  | 27   | -12 | 2 | 19 | 82   | 131  | 82  | -4  | 0 | 20 | 253  | 252  | 10  | -10 | 5 | 20 | 73   | 61   | 73  |
| -2  | 0 | 18 | 157  | 211  | 18  | -9  | 4 | 18 | 182  | 160  | 15   | -11 | 2 | 19 | 32   | 62   | 31  | -2  | 0 | 20 | 157  | 113  | 20  | -9  | 5 | 20 | 101  | 56   | 32  |
| 0   | 0 | 18 | 165  | 158  | 21  | -8  | 4 | 18 | 120  | 105  | 35   | -10 | 2 | 19 | 35   | 25   | 35  | 0   | 0 | 20 | 145  | 75   | 26  | -8  | 5 | 20 | 92   | 76   | 41  |
| 2   | 0 | 18 | 649  | 593  | 14  | -7  | 4 | 18 | 163  | 177  | 33   | -9  | 2 | 19 | 102  | 82   | 15  | 2   | 0 | 20 | 137  | 95   | 27  | -7  | 5 | 20 | 80   | 133  | 80  |
| 4   | 0 | 18 | 55   | 3    | 55  | -6  | 4 | 18 | 176  | 180  | 34   | -8  | 2 | 19 | 133  | 125  | 11  | 4   | 0 | 20 | 48   | 109  | 48  | -6  | 5 | 20 | 0    | 11   | 1   |
| 6   | 0 | 18 | 168  | 102  | 19  | -5  | 4 | 18 | 107  | 89   | 20   | -7  | 2 | 19 | 0    | 15   | 1   | -18 | 1 | 20 | 67   | 24   | 66  | -5  | 5 | 20 | 110  | 57   | 61  |
| -19 | 1 | 18 | 75   | 6    | 74  | -4  | 4 | 18 | 221  | 209  | 10   | -6  | 2 | 19 | 213  | 213  | 13  | -17 | 1 | 20 | 69   | 15   | 69  | -4  | 5 | 20 | 92   | 61   | 43  |
| -18 | 1 | 18 | 208  | 194  | 13  | -3  | 4 | 18 | 0    | 51   | 1    | -5  | 2 | 19 | 168  | 171  | 8   | -16 | 1 | 20 | 56   | 65   | 55  | -3  | 5 | 20 | 56   | 87   | 55  |
| -17 | 1 | 18 | 70   | 32   | 31  | -2  | 4 | 18 | 107  | 108  | 19   | -4  | 2 | 19 | 118  | 111  | 28  | -15 | 1 | 20 | 171  | 163  | 11  | -2  | 5 | 20 | 109  | 47   | 30  |
| -16 | 1 | 18 | 36   | 12   | 35  | -1  | 4 | 18 | 226  | 231  | 12   | -3  | 2 | 19 | 90   | 59   | 29  | -14 | 1 | 20 | 165  | 174  | 14  | -17 | 0 | 21 | 141  | 169  | 32  |
| -15 | 1 | 18 | 89   | 107  | 17  | 0   | 4 | 18 | 69   | 54   | 58   | -2  | 2 | 19 | 223  | 211  | 7   | -13 | 1 | 20 | 154  | 151  | 16  | -15 | 0 | 21 | 0    | 44   | 1   |
| -14 | 1 | 18 | 166  | 176  | 13  | 1   | 4 | 18 | 123  | 91   | 29   | -1  | 2 | 19 | 112  | 119  | 16  | -12 | 1 | 20 | 0    | 22   | 1   | -13 | 0 | 21 | 145  | 138  | 21  |
| -13 | 1 | 18 | 78   | 58   | 15  | 2   | 4 | 18 | 0    | 56   | 1    | 0   | 2 | 19 | 0    | 38   | 1   | -11 | 1 | 20 | 294  | 276  | 7   | -11 | 0 | 21 | 115  | 126  | 26  |
| -12 | 1 | 18 | 87   | 49   | 17  | 3   | 4 | 18 | 129  | 116  | 45   | 1   | 2 | 19 | 70   | 22   | 34  | -10 | 1 | 20 | 227  | 230  | 9   | -9  | 0 | 21 | 0    | 10   | 1   |
| -11 | 1 | 18 | 232  | 227  | 7   | 4   | 4 | 18 | 145  | 121  | 41   | 2   | 2 | 19 | 78   | 77   | 59  | -9  | 1 | 20 | 65   | 8    | 26  | -7  | 0 | 21 | 90   | 44   | 25  |
| -10 | 1 | 18 | 96   | 83   | 22  | -15 | 5 | 18 | 54   | 115  | 53   | 3   | 2 | 19 | 97   | 85   | 38  | -8  | 1 | 20 | 191  | 176  | 12  | -5  | 0 | 21 | 59   | 73   | 59  |
| -9  | 1 | 18 | 332  | 355  | 10  | -14 | 5 | 18 | 60   | 102  | 59   | 4   | 2 | 19 | 0    | 41   | 1   | -7  | 1 | 20 | 197  | 191  | 14  | -3  | 0 | 21 | 164  | 131  | 15  |
| -8  | 1 | 18 | 150  | 132  | 10  | -13 | 5 | 18 | 61   | 25   | 61   | -17 | 3 | 19 | 98   | 127  | 30  | -6  | 1 | 20 | 30   | 8    | 30  | -1  | 0 | 21 | 87   | 91   | 34  |
| -7  | 1 | 18 | 75   | 61   | 15  | -12 | 5 | 18 | 94   | 51   | 64   | -16 | 3 | 19 | 0    | 73   | 1   | -5  | 1 | 20 | 187  | 196  | 15  | 1   | 0 | 21 | 184  | 192  | 28  |
| -6  | 1 | 18 | 147  | 152  | 8   | -11 | 5 | 18 | 0    | 36   | 1    | -15 | 3 | 19 | 110  | 90   | 28  | -4  | 1 | 20 | 136  | 138  | 11  | -17 | 1 | 21 | 199  | 188  | 27  |
| -5  | 1 | 18 | 360  | 339  | 9   | -10 | 5 | 18 | 60   | 97   | 60   | -14 | 3 | 19 | 51   | 82   | 50  | -3  | 1 | 20 | 95   | 108  | 15  | -16 | 1 | 21 | 172  | 108  | 29  |
| -4  | 1 | 18 | 144  | 139  | 9   | -9  | 5 | 18 | 163  | 161  | 15   | -13 | 3 | 19 | 169  | 159  | 24  | -2  | 1 | 20 | 240  | 223  | 11  | -15 | 1 | 21 | 205  | 195  | 14  |
| -3  | 1 | 18 | 132  | 127  | 13  | -8  | 5 | 18 | 292  | 269  | 15   | -12 | 3 | 19 | 209  | 213  | 25  | -1  | 1 | 20 | 57   | 76   | 56  | -14 | 1 | 21 | 0    | 36   | 1   |
| -2  | 1 | 18 | 171  | 174  | 8   | -7  | 5 | 18 | 192  | 175  | 33   | -11 | 3 | 19 | 17   | 7    | 17  | 0   | 1 | 20 | 92   | 60   | 45  | -13 | 1 | 21 | 77   | 74   | 77  |
| -1  | 1 | 18 | 220  | 222  | 7   | -6  | 5 | 18 | 293  | 275  | 12   | -10 | 3 | 19 | 228  | 206  | 24  | 1   | 1 | 20 | 156  | 147  | 22  | -12 | 1 | 21 | 53   | 62   | 52  |
| 0   | 1 | 18 | 167  | 168  | 9   | -5  | 5 | 18 | 155  | 144  | 15   | -9  | 3 | 19 | 323  | 322  | 20  | 2   | 1 | 20 | 191  | 182  | 13  | -11 | 1 | 21 | 170  | 181  | 10  |
| 1   | 1 | 18 | 247  | 232  | 9   | -4  | 5 | 18 | 160  | 162  | 12   | -8  | 3 | 19 | 90   | 97   | 24  | 3   | 1 | 20 | 0    | 51   | 1   | -10 | 1 | 21 | 138  | 148  | 17  |
| 2   | 1 | 18 | 0    | 45   | 1   | -3  | 5 | 18 | 94   | 80   | 28   | -7  | 3 | 19 | 251  | 239  | 23  | 4   | 1 | 20 | 106  | 8    | 65  | -9  | 1 | 21 | 200  | 180  | 12  |
| 3   | 1 | 18 | 78   | 52   | 45  | -2  | 5 | 18 | 211  | 185  | 21   | -6  | 3 | 19 | 217  | 182  | 14  | -17 | 2 | 20 | 52   | 37   | 52  | -8  | 1 | 21 | 37   | 41   | 37  |
| 4   | 1 | 18 | 68   | 14   | 52  | -1  | 5 | 18 | 0    | 9    | 1    | -5  | 3 | 19 | 59   | 68   | 59  | -16 | 2 | 20 | 53   | 126  | 52  | -7  | 1 | 21 | 0    | 14   | 1   |
| 5   | 1 | 18 | 64   | 109  | 63  | 0   | 5 | 18 | 65   | 31   | 64   | -4  | 3 | 19 | 155  | 124  | 11  | -15 | 2 | 20 | 227  | 228  | 17  | -6  | 1 | 21 | 253  | 241  | 9   |
| 6   | 1 | 18 | 78   | 32   | 78  | 1   | 5 | 18 | 109  | 108  | 39   | -3  | 3 | 19 | 160  | 126  | 11  | -14 | 2 | 20 | 0    | 36   | 1   | -5  | 1 | 21 | 34   | 57   | 34  |
| -18 | 2 | 18 | 38   | 66   | 37  | 2   | 5 | 18 | 94   | 21   | 54   | -2  | 3 | 19 | 116  | 135  | 14  | -13 | 2 | 20 | 141  | 143  | 16  | -4  | 1 | 21 | 105  | 75   | 25  |
| -17 | 2 | 18 | 0    | 63   | 1   | -12 | 6 | 18 | 75   | 28   | 74   | -1  | 3 | 19 | 94   | 120  | 18  | -12 | 2 | 20 | 136  | 99   | 47  | -3  | 1 | 21 | 40   | 15   | 40  |
| -16 | 2 | 18 | 66   | 87   | 66  | -11 | 6 | 18 | 53   | 45   | 52   | 0   | 3 | 19 | 91   | 117  | 34  | -11 | 2 | 20 | 18   | 86   | 17  | -2  | 1 | 21 | 167  | 158  | 16  |
| -15 | 2 | 18 | 37   | 27   | 37  | -10 | 6 | 18 | 208  | 188  | 17   | 1   | 3 | 19 | 108  | 112  | 21  | -10 | 2 | 20 | 111  | 107  | 14  | -1  | 1 | 21 | 144  | 104  | 16  |
| -14 | 2 | 18 | 138  | 128  | 19  | -9  | 6 | 18 | 146  | 145  | 25   | 2   | 3 | 19 | 86   | 71   | 61  | -9  | 2 | 20 | 402  | 387  | 23  | 0   | 1 | 21 | 74   | 71   | 39  |
| -13 | 2 | 18 | 209  | 179  | 18  | -8  | 6 | 18 | 78   | 30   | 77   | 3   | 3 | 19 | 0    | 62   | 1   | -8  | 2 | 20 | 107  | 74   | 14  | 1   | 1 | 21 | 0    | 26   | 1   |
| -12 | 2 | 18 | 0    | 31   | 1   | -7  | 6 | 18 | 89   | 57   | 88   | 4   | 3 | 19 | 0    | 84   | 1   | -7  | 2 | 20 | 147  | 132  | 12  | 2   | 1 | 21 | 104  | 100  | 23  |
| -11 | 2 | 18 | 294  | 277  | 15  | -6  | 6 | 18 | 242  | 218  | 24   | -16 | 4 | 19 | 152  | 25   | 31  | -6  | 2 | 20 | 11   | 44   | 10  | -16 | 2 | 21 | 94   | 84   | 31  |
| -10 | 2 | 18 | 190  | 188  | 9   | -5  | 6 | 18 | 81   | 82   | 68   | -15 | 4 | 19 | 131  | 117  | 29  | -5  | 2 | 20 | 98   | 128  | 19  | -15 | 2 | 21 | 22   | 67   | 22  |
| -9  | 2 | 18 | 216  | 183  | 9   | -4  | 6 | 18 | 99   | 109  | 40   | -14 | 4 | 19 | 181  | 131  | 17  | -4  | 2 | 20 | 169  | 175  | 14  | -14 | 2 | 21 | 156  | 155  | 23  |
| -8  | 2 | 18 | 114  | 123  | 13  | -3  | 6 | 18 | 67   | 33   | 67   | -13 | 4 | 19 | 74   | 11   | 48  | -3  | 2 | 20 | 0    | 50   | 1   | -13 | 2 | 21 | 0    | 33   | 1   |
| -7  | 2 | 18 | 547  | 535  | 13  | -2  | 6 | 18 | 0    | 11   | 1    | -12 | 4 | 19 | 51   | 60   | 51  | -2  | 2 | 20 | 68   | 35   | 28  | -12 | 2 | 21 | 0    | 9    | 1   |
| -6  | 2 | 18 | 394  | 376  | 14  | -1  | 6 | 18 | 98   | 80   | 28   | -11 | 4 | 19 | 322  | 310  | 11  | -1  | 2 | 20 | 0    | 13   | 1   | -11 | 2 | 21 | 22   | 57   | 21  |
| -5  | 2 | 18 | 7    | 20   | 7   | -17 | 0 | 19 | 259  | 220  | 20   | -10 | 4 | 19 | 197  | 191  | 24  | 0   | 2 | 20 | 64   | 37   | 40  | -10 | 2 | 21 | 177  | 175  | 18  |
| -4  | 2 | 18 | 95   | 98   | 16  | -15 | 0 | 19 | 146  | 130  | 17</ |     |   |    |      |      |     |     |   |    |      |      |     |     |   |    |      |      |     |

Table 7. Observed and calculated structure factors for 3a

| h   | k | l  | 10Fo | 10Fc | 10s | h   | k | l  | 10Fo | 10Fc | 10s | h   | k | l  | 10Fo | 10Fc | 10s | h   | k | l  | 10Fo | 10Fc | 10s | h   | k | l  | 10Fo | 10Fc | 10s |
|-----|---|----|------|------|-----|-----|---|----|------|------|-----|-----|---|----|------|------|-----|-----|---|----|------|------|-----|-----|---|----|------|------|-----|
| -10 | 4 | 21 | 105  | 90   | 34  | -13 | 1 | 22 | 0    | 75   | 1   | -4  | 2 | 22 | 79   | 102  | 78  | -7  | 0 | 23 | 61   | 38   | 60  | -4  | 2 | 23 | 94   | 11   | 51  |
| -9  | 4 | 21 | 0    | 74   | 1   | -12 | 1 | 22 | 71   | 61   | 34  | -3  | 2 | 22 | 237  | 218  | 14  | -5  | 0 | 23 | 185  | 176  | 24  | -3  | 2 | 23 | 0    | 54   | 1   |
| -8  | 4 | 21 | 83   | 62   | 83  | -11 | 1 | 22 | 48   | 13   | 47  | -2  | 2 | 22 | 0    | 16   | 1   | -3  | 0 | 23 | 0    | 42   | 1   | -11 | 3 | 23 | 85   | 164  | 84  |
| -7  | 4 | 21 | 64   | 51   | 64  | -10 | 1 | 22 | 108  | 94   | 18  | -1  | 2 | 22 | 154  | 120  | 35  | -14 | 1 | 23 | 70   | 49   | 69  | -10 | 3 | 23 | 0    | 63   | 1   |
| -6  | 4 | 21 | 74   | 65   | 43  | -9  | 1 | 22 | 0    | 2    | 1   | -13 | 3 | 22 | 85   | 63   | 38  | -13 | 1 | 23 | 0    | 48   | 1   | -9  | 3 | 23 | 52   | 61   | 52  |
| -5  | 4 | 21 | 54   | 62   | 53  | -8  | 1 | 22 | 119  | 111  | 17  | -12 | 3 | 22 | 0    | 57   | 1   | -12 | 1 | 23 | 271  | 273  | 14  | -8  | 3 | 23 | 0    | 16   | 1   |
| -4  | 4 | 21 | 0    | 62   | 1   | -7  | 1 | 22 | 98   | 83   | 19  | -11 | 3 | 22 | 76   | 106  | 75  | -11 | 1 | 23 | 75   | 23   | 74  | -7  | 3 | 23 | 79   | 40   | 78  |
| -3  | 4 | 21 | 0    | 80   | 1   | -6  | 1 | 22 | 46   | 67   | 45  | -10 | 3 | 22 | 230  | 235  | 36  | -10 | 1 | 23 | 45   | 6    | 45  | -6  | 3 | 23 | 0    | 94   | 1   |
| -2  | 4 | 21 | 85   | 66   | 85  | -5  | 1 | 22 | 0    | 20   | 1   | -9  | 3 | 22 | 0    | 14   | 1   | -9  | 1 | 23 | 106  | 77   | 28  | -5  | 3 | 23 | 57   | 64   | 57  |
| -9  | 5 | 21 | 42   | 91   | 42  | -4  | 1 | 22 | 74   | 12   | 50  | -8  | 3 | 22 | 118  | 129  | 27  | -8  | 1 | 23 | 177  | 170  | 17  | -12 | 0 | 24 | 135  | 144  | 25  |
| -8  | 5 | 21 | 210  | 183  | 37  | -3  | 1 | 22 | 0    | 8    | 1   | -7  | 3 | 22 | 109  | 122  | 26  | -7  | 1 | 23 | 124  | 115  | 19  | -10 | 0 | 24 | 0    | 35   | 1   |
| -7  | 5 | 21 | 188  | 167  | 19  | -2  | 1 | 22 | 0    | 10   | 1   | -6  | 3 | 22 | 93   | 37   | 93  | -6  | 1 | 23 | 92   | 59   | 38  | -8  | 0 | 24 | 27   | 12   | 27  |
| -6  | 5 | 21 | 146  | 80   | 78  | -1  | 1 | 22 | 126  | 132  | 36  | -5  | 3 | 22 | 170  | 154  | 46  | -5  | 1 | 23 | 42   | 31   | 41  | -6  | 0 | 24 | 63   | 150  | 62  |
| -16 | 0 | 22 | 63   | 43   | 63  | 0   | 1 | 22 | 48   | 71   | 48  | -4  | 3 | 22 | 0    | 5    | 1   | -4  | 1 | 23 | 10   | 30   | 10  | -11 | 1 | 24 | 214  | 192  | 21  |
| -14 | 0 | 22 | 38   | 75   | 37  | -15 | 2 | 22 | 232  | 205  | 30  | -3  | 3 | 22 | 0    | 1    | 1   | -3  | 1 | 23 | 106  | 97   | 26  | -10 | 1 | 24 | 164  | 123  | 31  |
| -12 | 0 | 22 | 211  | 195  | 34  | -14 | 2 | 22 | 122  | 111  | 26  | -2  | 3 | 22 | 57   | 106  | 57  | -2  | 1 | 23 | 0    | 52   | 1   | -9  | 1 | 24 | 0    | 3    | 1   |
| -10 | 0 | 22 | 148  | 144  | 15  | -13 | 2 | 22 | 0    | 23   | 1   | -11 | 4 | 22 | 181  | 114  | 27  | -13 | 2 | 23 | 233  | 191  | 23  | -8  | 1 | 24 | 63   | 19   | 62  |
| -8  | 0 | 22 | 102  | 132  | 27  | -12 | 2 | 22 | 0    | 25   | 1   | -10 | 4 | 22 | 160  | 154  | 40  | -12 | 2 | 23 | 40   | 43   | 40  | -7  | 1 | 24 | 121  | 135  | 28  |
| -6  | 0 | 22 | 333  | 295  | 26  | -11 | 2 | 22 | 0    | 11   | 1   | -9  | 4 | 22 | 172  | 161  | 37  | -11 | 2 | 23 | 0    | 6    | 1   | -6  | 1 | 24 | 144  | 128  | 16  |
| -4  | 0 | 22 | 148  | 161  | 20  | -10 | 2 | 22 | 127  | 56   | 23  | -8  | 4 | 22 | 155  | 143  | 29  | -10 | 2 | 23 | 157  | 124  | 24  | -5  | 1 | 24 | 58   | 15   | 57  |
| -2  | 0 | 22 | 0    | 36   | 1   | -9  | 2 | 22 | 0    | 21   | 1   | -7  | 4 | 22 | 0    | 2    | 1   | -9  | 2 | 23 | 189  | 166  | 40  | -9  | 2 | 24 | 0    | 58   | 1   |
| 0   | 0 | 22 | 210  | 184  | 23  | -8  | 2 | 22 | 0    | 68   | 1   | -6  | 4 | 22 | 0    | 49   | 1   | -8  | 2 | 23 | 128  | 153  | 38  | -8  | 2 | 24 | 94   | 51   | 93  |
| -16 | 1 | 22 | 89   | 98   | 89  | -7  | 2 | 22 | 54   | 56   | 53  | -5  | 4 | 22 | 156  | 155  | 24  | -7  | 2 | 23 | 110  | 136  | 26  |     |   |    |      |      |     |
| -15 | 1 | 22 | 13   | 19   | 12  | -6  | 2 | 22 | 54   | 18   | 53  | -11 | 0 | 23 | 47   | 33   | 47  | -6  | 2 | 23 | 0    | 10   | 1   |     |   |    |      |      |     |
| -14 | 1 | 22 | 96   | 70   | 32  | -5  | 2 | 22 | 0    | 16   | 1   | -9  | 0 | 23 | 84   | 99   | 63  | -5  | 2 | 23 | 0    | 22   | 1   |     |   |    |      |      |     |

## V. X-Ray Crystallographic Data for Compound **3f**

View of **3f** showing the atom labeling scheme. Displacement ellipsoids are scaled to the 50% probability level. The disordered thiophene ring is shown.

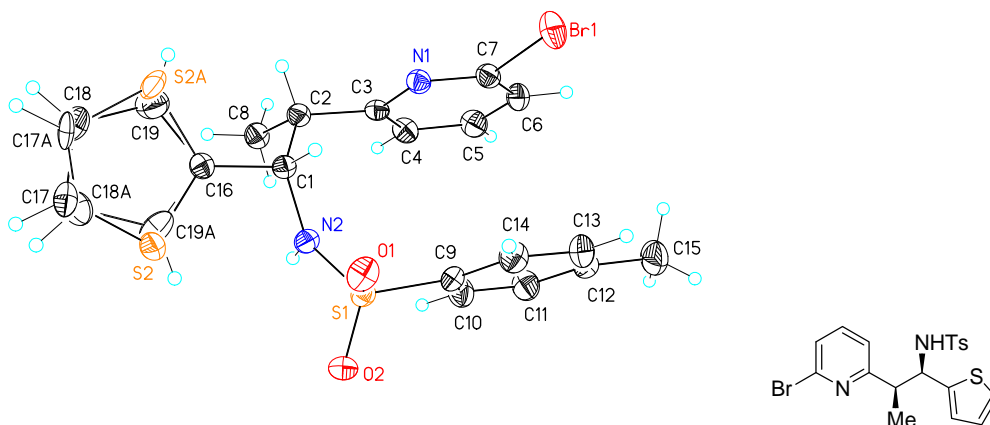

Unit cell packing diagram for **3f**. The view is approximately down the **a** axis. Dashed lines are indicative of H-bonding interactions. The geometry of this interaction is: N2-H2 $\cdots$ O2 (related by 1-x, -y, 1-z), N $\cdots$ O 2.983(2)Å, H $\cdots$ O 2.24(2)Å, N-H $\cdots$ O 166(2) $^\circ$ .

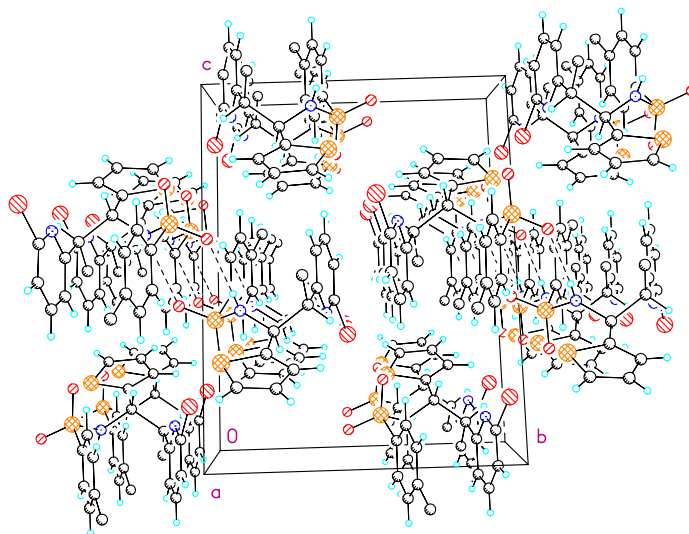



## X-ray Experimental

Table 1. Crystallographic Data for **3f**.

Table 2. Fractional coordinates and equivalent isotropic thermal parameters ( $\text{\AA}^2$ ) for the non-hydrogen atoms of **3f**.

Table 3. Bond Lengths ( $\text{\AA}$ ) and Angles ( $^\circ$ ) for the non-hydrogen atoms of **3f**.

Table 4. Anisotropic thermal parameters for the non-hydrogen atoms of **3f**.

Table 5. Fractional coordinates and isotropic thermal parameters ( $\text{\AA}^2$ ) for the hydrogen atoms of **3f**.

Table 6. Torsion Angles ( $^\circ$ ) for the non-hydrogen atoms of **3f**.

Table 7. Observed and calculated structure factor amplitudes for **3f**. Values for  $F_o$ ,  $F_c$  and  $\sigma(F_o)$  have been multiplied by 10.

Figure 1. View of **3f** showing the atom labeling scheme. Displacement ellipsoids are scaled to the 50% probability level. The disordered thiophene ring is shown.

Figure 2. Unit cell packing diagram for **3f**. The view is approximately down the **a** axis. Dashed lines are indicative of H-bonding interactions. The geometry of this interaction is:  $\text{N2-H2}\cdots\text{O2}$  (related by  $1-x, -y, 1-z$ ),  $\text{N}\cdots\text{O}$  2.983(2) $\text{\AA}$ ,  $\text{H}\cdots\text{O}$  2.24(2) $\text{\AA}$ ,  $\text{N-H}\cdots\text{O}$  166(2) $^\circ$ .

X-ray Experimental for  $\text{C}_{19}\text{H}_{19}\text{N}_2\text{O}_2\text{S}_2\text{Br}$ : Crystals grew as large, colorless prisms by slow evaporation from dichloromethane and hexanes. The data crystal was cut from a larger crystal and had approximate dimensions; 0.35 x 0.32 x 0.24 mm. The data were collected on a Nonius Kappa CCD diffractometer using a graphite monochromator with  $\text{MoK}\alpha$  radiation ( $\lambda = 0.71073\text{\AA}$ ). A total of 209 frames of data were collected using  $\omega$ -scans with a scan range of  $2^\circ$  and a counting time of 34 seconds per frame. The data were collected at 153 K using an Oxford Cryostream low temperature device. Details of crystal data, data collection and structure refinement are listed in Table 1. Data reduction were performed using DENZO-SMN.<sup>1</sup> The structure was solved by direct methods using SIR97<sup>2</sup> and refined by full-matrix least-squares on  $F^2$  with anisotropic displacement parameters for the non-H atoms using SHELXL-97.<sup>3</sup> The

hydrogen atoms on carbon were calculated in ideal positions with isotropic displacement parameters set to 1.2xUeq of the attached atom (1.5xUeq for methyl hydrogen atoms). The hydrogen atom bound to N<sub>2</sub> was observed in a  $\Delta F$  map and refined with an isotropic displacement parameter.

The thiophene ring was disordered by rotation about the C-C bond to the remainder of the molecule. The rings are rotated by about 180 degrees relative to each other. The disorder was modeled by assigning the variable x to the site occupancy factors of one orientation of the ring and (1-x) to the site occupancy factors for the alternate conformation. The geometry of the two rings was restrained to be equal throughout the refinement process. The variable x refined to a value very close to 0.5. The site occupancy factors were then set to 1/2 for the remainder of the refinement. The atoms were refined anisotropically with their displacement parameters restrained to be approximately isotropic.

The function,  $\Sigma w(|F_o|^2 - |F_c|^2)^2$ , was minimized, where  $w = 1/[(\sigma(F_o))^2 + (0.0321*P)^2 + (1.1485*P)]$  and  $P = (|F_o|^2 + 2|F_c|^2)/3$ .  $R_w(F^2)$  refined to 0.0700, with R(F) equal to 0.0291 and a goodness of fit, S, = 1.00. Definitions used for calculating R(F),  $R_w(F^2)$  and the goodness of fit, S, are given below.<sup>4</sup> The data were corrected for secondary extinction effects. The correction takes the form:  $F_{corr} = kF_c/[1 + (1.0(3) \times 10^{-6}) * F_c^2 \lambda^3 / (\sin 2\theta)]^{0.25}$  where k is the overall scale factor. Neutral atom scattering factors and values used to calculate the linear absorption coefficient are from the International Tables for X-ray Crystallography (1992).<sup>5</sup> All figures were generated using SHELXTL/PC.<sup>6</sup> Tables of positional and thermal parameters, bond lengths and angles, torsion angles, figures and lists of observed and calculated structure factors are located in tables1-7.

## References

- 7) DENZO-SMN. (1997). Z. Otwinowski and W. Minor, Methods in Enzymology, **276**: Macromolecular Crystallography, part A, 307 – 326, C. W. Carter, Jr. and R. M. Sweets, Editors, Academic Press.
- 8) SIR97. (1999). A program for crystal structure solution. Altomare A., Burla M.C., Camalli M., Cascarano G.L., Giacovazzo C. , Guagliardi A., Moliterni A.G.G., Polidori G., Spagna R. J. Appl. Cryst. 32, 115-119.
- 9) Sheldrick, G. M. (1994). SHELXL97. Program for the Refinement of Crystal Structures. University of Gottingen, Germany.
- 10)  $R_w(F^2) = \{ \sum w(|F_o|^2 - |F_c|^2)^2 / \sum w(|F_o|^4) \}^{1/2}$  where w is the weight given each reflection.  
 $R(F) = \sum (|F_o| - |F_c|) / \sum |F_o|$  for reflections with  $F_o > 4(\sigma(F_o))$ .  
 $S = [ \sum w(|F_o|^2 - |F_c|^2)^2 / (n - p) ]^{1/2}$ , where n is the number of reflections and p is the number of refined parameters.
- 11) International Tables for X-ray Crystallography (1992). Vol. C, Tables 4.2.6.8 and 6.1.1.4, A. J. C. Wilson, editor, Boston: Kluwer Academic Press.
- 12) Sheldrick, G. M. (1994). SHELXTL/PC (Version 5.03). Siemens Analytical X-ray Instruments, Inc., Madison, Wisconsin, USA.

Table 1. Crystal data and structure refinement for **3f**.

|                                   |                                                                                 |                  |
|-----------------------------------|---------------------------------------------------------------------------------|------------------|
| Empirical formula                 | C <sub>19</sub> H <sub>19</sub> Br N <sub>2</sub> O <sub>2</sub> S <sub>2</sub> |                  |
| Formula weight                    | 451.39                                                                          |                  |
| Temperature                       | 153(2) K                                                                        |                  |
| Wavelength                        | 0.71073 Å                                                                       |                  |
| Crystal system                    | Monoclinic                                                                      |                  |
| Space group                       | P2 <sub>1</sub> /c                                                              |                  |
| Unit cell dimensions              | a = 10.6171(3) Å                                                                | α = 90°.         |
|                                   | b = 12.0557(4) Å                                                                | β = 108.334(1)°. |
|                                   | c = 15.7265(7) Å                                                                | γ = 90°.         |
| Volume                            | 1910.76(12) Å <sup>3</sup>                                                      |                  |
| Z                                 | 4                                                                               |                  |
| Density (calculated)              | 1.569 Mg/m <sup>3</sup>                                                         |                  |
| Absorption coefficient            | 2.386 mm <sup>-1</sup>                                                          |                  |
| F(000)                            | 920                                                                             |                  |
| Crystal size                      | 0.35 x 0.32 x 0.24 mm                                                           |                  |
| Theta range for data collection   | 2.17 to 27.48°.                                                                 |                  |
| Index ranges                      | -13 ≤ h ≤ 13, -15 ≤ k ≤ 15, -20 ≤ l ≤ 20                                        |                  |
| Reflections collected             | 8165                                                                            |                  |
| Independent reflections           | 4366 [R(int) = 0.0185]                                                          |                  |
| Completeness to theta = 27.48°    | 99.6 %                                                                          |                  |
| Absorption correction             | Semi-empirical from equivalents                                                 |                  |
| Max. and min. transmission        | 0.56 and 0.47                                                                   |                  |
| Refinement method                 | Full-matrix least-squares on F <sup>2</sup>                                     |                  |
| Data / restraints / parameters    | 4366 / 108 / 280                                                                |                  |
| Goodness-of-fit on F <sup>2</sup> | 0.997                                                                           |                  |
| Final R indices [I > 2σ(I)]       | R <sub>1</sub> = 0.0291, wR <sub>2</sub> = 0.0653                               |                  |
| R indices (all data)              | R <sub>1</sub> = 0.0404, wR <sub>2</sub> = 0.0700                               |                  |
| Extinction coefficient            | 1.0(3) × 10 <sup>-6</sup>                                                       |                  |
| Largest diff. peak and hole       | 0.379 and -0.501 e.Å <sup>-3</sup>                                              |                  |

Table 2. Atomic coordinates ( $\times 10^4$ ) and equivalent isotropic displacement parameters ( $\text{\AA}^2 \times 10^3$ ) for 1.  $U(\text{eq})$  is defined as one third of the trace of the orthogonalized  $U^{ij}$  tensor.

|      | x        | y       | z       | $U(\text{eq})$ |
|------|----------|---------|---------|----------------|
| Br1  | 71(1)    | 4557(1) | 3344(1) | 33(1)          |
| N1   | 2695(1)  | 3922(1) | 3934(1) | 21(1)          |
| N2   | 4474(2)  | 1371(1) | 4065(1) | 21(1)          |
| O1   | 2495(1)  | 658(1)  | 2901(1) | 29(1)          |
| O2   | 3710(1)  | -498(1) | 4209(1) | 26(1)          |
| S1   | 3202(1)  | 565(1)  | 3838(1) | 20(1)          |
| S2   | 6076(2)  | 866(2)  | 2885(2) | 27(1)          |
| C17  | 7144(8)  | 1348(8) | 2353(5) | 28(2)          |
| C18  | 7115(8)  | 2466(8) | 2298(6) | 29(2)          |
| C19  | 6221(10) | 2948(7) | 2688(6) | 34(3)          |
| S2A  | 6147(3)  | 3207(2) | 2585(2) | 30(1)          |
| C17A | 7163(7)  | 2328(8) | 2217(6) | 27(2)          |
| C18A | 7025(9)  | 1254(8) | 2456(6) | 31(2)          |
| C19A | 6101(10) | 1155(7) | 2932(6) | 36(3)          |
| C1   | 4581(2)  | 2360(2) | 3554(1) | 20(1)          |
| C2   | 4969(2)  | 3393(2) | 4167(1) | 21(1)          |
| C3   | 3874(2)  | 3664(1) | 4554(1) | 20(1)          |
| C4   | 4025(2)  | 3666(2) | 5465(1) | 26(1)          |
| C5   | 2954(2)  | 3931(2) | 5750(1) | 29(1)          |
| C6   | 1749(2)  | 4183(2) | 5124(1) | 27(1)          |
| C7   | 1701(2)  | 4168(2) | 4232(1) | 22(1)          |
| C8   | 6332(2)  | 3264(2) | 4871(1) | 25(1)          |
| C9   | 2146(2)  | 1018(2) | 4443(1) | 22(1)          |
| C10  | 2638(2)  | 1022(2) | 5369(1) | 30(1)          |
| C11  | 1802(2)  | 1302(2) | 5858(1) | 33(1)          |
| C12  | 484(2)   | 1582(2) | 5433(1) | 30(1)          |
| C13  | 18(2)    | 1578(2) | 4503(1) | 34(1)          |
| C14  | 836(2)   | 1300(2) | 4001(1) | 29(1)          |
| C15  | -409(2)  | 1910(2) | 5971(2) | 45(1)          |
| C16  | 5560(2)  | 2157(2) | 3048(1) | 21(1)          |

Table 3. Bond lengths [ $\text{\AA}$ ] and angles [ $^\circ$ ] for **3f**.

|           |            |          |          |
|-----------|------------|----------|----------|
| Br1-C7    | 1.9090(18) | C2-C3    | 1.509(2) |
| N1-C7     | 1.316(2)   | C2-C8    | 1.529(2) |
| N1-C3     | 1.359(2)   | C2-H2    | 1.00     |
| N2-C1     | 1.462(2)   | C3-C4    | 1.389(2) |
| N2-S1     | 1.6100(16) | C4-C5    | 1.385(3) |
| N2-H2N    | 0.76(2)    | C4-H4    | 0.95     |
| O1-S1     | 1.4335(14) | C5-C6    | 1.381(3) |
| O2-S1     | 1.4411(13) | C5-H5    | 0.95     |
| S1-C9     | 1.7693(18) | C6-C7    | 1.388(3) |
| S2-C16    | 1.696(3)   | C6-H6    | 0.95     |
| S2-C17    | 1.708(7)   | C8-H8A   | 0.98     |
| C17-C18   | 1.351(11)  | C8-H8B   | 0.98     |
| C17-H17A  | 0.95       | C8-H8C   | 0.98     |
| C18-C19   | 1.406(11)  | C9-C10   | 1.385(3) |
| C18-H18A  | 0.95       | C9-C14   | 1.387(3) |
| C19-C16   | 1.405(10)  | C10-C11  | 1.386(3) |
| C19-H19A  | 0.95       | C10-H10  | 0.95     |
| S2A-C16   | 1.676(3)   | C11-C12  | 1.390(3) |
| S2A-C17A  | 1.735(7)   | C11-H11  | 0.95     |
| C17A-C18A | 1.368(11)  | C12-C13  | 1.389(3) |
| C17A-H17B | 0.95       | C12-C15  | 1.509(3) |
| C18A-C19A | 1.414(12)  | C13-C14  | 1.386(3) |
| C18A-H18B | 0.95       | C13-H13  | 0.95     |
| C19A-C16  | 1.374(9)   | C14-H14  | 0.95     |
| C19A-H19B | 0.95       | C15-H15A | 0.98     |
| C1-C16    | 1.514(2)   | C15-H15B | 0.98     |
| C1-C2     | 1.550(2)   | C15-H15C | 0.98     |
| C1-H1     | 1.00       |          |          |

|                |            |             |            |
|----------------|------------|-------------|------------|
| C7-N1-C3       | 117.11(15) | C3-C2-C8    | 113.85(15) |
| C1-N2-S1       | 125.11(13) | C3-C2-C1    | 109.72(14) |
| C1-N2-H2N      | 121.5(16)  | C8-C2-C1    | 112.01(15) |
| S1-N2-H2N      | 113.4(16)  | C3-C2-H2    | 107.0      |
| O1-S1-O2       | 119.65(8)  | C8-C2-H2    | 107.0      |
| O1-S1-N2       | 108.18(8)  | C1-C2-H2    | 107.0      |
| O2-S1-N2       | 105.43(8)  | N1-C3-C4    | 121.45(17) |
| O1-S1-C9       | 108.24(9)  | N1-C3-C2    | 114.31(15) |
| O2-S1-C9       | 106.09(8)  | C4-C3-C2    | 124.23(16) |
| N2-S1-C9       | 108.89(8)  | C5-C4-C3    | 119.59(17) |
| C16-S2-C17     | 93.3(3)    | C5-C4-H4    | 120.2      |
| C18-C17-S2     | 111.4(5)   | C3-C4-H4    | 120.2      |
| C18-C17-H17A   | 124.3      | C6-C5-C4    | 119.37(17) |
| S2-C17-H17A    | 124.3      | C6-C5-H5    | 120.3      |
| C17-C18-C19    | 112.9(6)   | C4-C5-H5    | 120.3      |
| C17-C18-H18A   | 123.6      | C5-C6-C7    | 116.69(18) |
| C19-C18-H18A   | 123.5      | C5-C6-H6    | 121.7      |
| C16-C19-C18    | 112.7(7)   | C7-C6-H6    | 121.7      |
| C16-C19-H19A   | 123.6      | N1-C7-C6    | 125.78(17) |
| C18-C19-H19A   | 123.6      | N1-C7-Br1   | 116.03(13) |
| C16-S2A-C17A   | 92.2(3)    | C6-C7-Br1   | 118.18(14) |
| C18A-C17A-S2A  | 110.8(5)   | C2-C8-H8A   | 109.5      |
| C18A-C17A-H17B | 124.6      | C2-C8-H8B   | 109.5      |
| S2A-C17A-H17B  | 124.6      | H8A-C8-H8B  | 109.5      |
| C17A-C18A-C19A | 112.2(7)   | C2-C8-H8C   | 109.5      |
| C17A-C18A-H18B | 123.9      | H8A-C8-H8C  | 109.5      |
| C19A-C18A-H18B | 123.9      | H8B-C8-H8C  | 109.5      |
| C16-C19A-C18A  | 112.6(7)   | C10-C9-C14  | 120.89(17) |
| C16-C19A-H19B  | 123.7      | C10-C9-S1   | 118.22(14) |
| C18A-C19A-H19B | 123.7      | C14-C9-S1   | 120.78(14) |
| N2-C1-C16      | 110.05(14) | C9-C10-C11  | 119.24(18) |
| N2-C1-C2       | 111.35(14) | C9-C10-H10  | 120.4      |
| C16-C1-C2      | 111.35(14) | C11-C10-H10 | 120.4      |
| N2-C1-H1       | 108.0      | C10-C11-C12 | 121.06(19) |
| C16-C1-H1      | 108.0      | C10-C11-H11 | 119.5      |
| C2-C1-H1       | 108.0      | C12-C11-H11 | 119.5      |

|               |            |               |            |
|---------------|------------|---------------|------------|
| C13-C12-C11   | 118.52(19) | C12-C15-H15C  | 109.5      |
| C13-C12-C15   | 120.85(19) | H15A-C15-H15C | 109.5      |
| C11-C12-C15   | 120.6(2)   | H15B-C15-H15C | 109.5      |
| C14-C13-C12   | 121.37(19) | C19A-C16-C19  | 105.1(7)   |
| C14-C13-H13   | 119.3      | C19A-C16-C1   | 126.6(5)   |
| C12-C13-H13   | 119.3      | C19-C16-C1    | 128.0(4)   |
| C13-C14-C9    | 118.92(18) | C19A-C16-S2A  | 112.2(5)   |
| C13-C14-H14   | 120.5      | C1-C16-S2A    | 121.18(16) |
| C9-C14-H14    | 120.5      | C19-C16-S2    | 109.6(4)   |
| C12-C15-H15A  | 109.5      | C1-C16-S2     | 122.34(16) |
| C12-C15-H15B  | 109.5      | S2A-C16-S2    | 116.44(17) |
| H15A-C15-H15B | 109.5      |               |            |



Table 4. Anisotropic displacement parameters ( $\text{\AA}^2 \times 10^3$ ) for **3f**. The anisotropic displacement factor exponent takes the form:  $-2\pi^2 [h^2 a^{*2} U^{11} + \dots + 2 h k a^* b^* U^{12}]$

|      | U <sup>11</sup> | U <sup>22</sup> | U <sup>33</sup> | U <sup>23</sup> | U <sup>13</sup> | U <sup>12</sup> |
|------|-----------------|-----------------|-----------------|-----------------|-----------------|-----------------|
| Br1  | 22(1)           | 46(1)           | 28(1)           | -2(1)           | 5(1)            | 7(1)            |
| N1   | 21(1)           | 19(1)           | 22(1)           | -2(1)           | 7(1)            | 0(1)            |
| N2   | 18(1)           | 21(1)           | 21(1)           | 3(1)            | 4(1)            | -1(1)           |
| O1   | 27(1)           | 36(1)           | 22(1)           | -4(1)           | 5(1)            | -7(1)           |
| O2   | 30(1)           | 18(1)           | 31(1)           | 0(1)            | 10(1)           | -1(1)           |
| S1   | 20(1)           | 20(1)           | 20(1)           | -2(1)           | 7(1)            | -3(1)           |
| S2   | 31(1)           | 25(1)           | 30(1)           | 1(1)            | 15(1)           | 5(1)            |
| C17  | 23(2)           | 40(3)           | 24(3)           | 1(2)            | 12(2)           | 2(2)            |
| C18  | 31(3)           | 38(3)           | 21(2)           | -2(2)           | 10(2)           | -6(2)           |
| C19  | 43(4)           | 30(4)           | 32(3)           | 2(3)            | 14(2)           | 0(3)            |
| S2A  | 39(1)           | 28(1)           | 34(1)           | 2(1)            | 26(1)           | -6(1)           |
| C17A | 22(2)           | 43(3)           | 23(2)           | -8(2)           | 18(2)           | -2(2)           |
| C18A | 31(3)           | 36(3)           | 25(3)           | -2(2)           | 8(2)            | 6(2)            |
| C19A | 41(4)           | 42(5)           | 29(3)           | 6(3)            | 14(2)           | -11(3)          |
| C1   | 20(1)           | 19(1)           | 20(1)           | 1(1)            | 7(1)            | 0(1)            |
| C2   | 21(1)           | 19(1)           | 21(1)           | 0(1)            | 7(1)            | 0(1)            |
| C3   | 22(1)           | 15(1)           | 23(1)           | -1(1)           | 7(1)            | 0(1)            |
| C4   | 27(1)           | 26(1)           | 23(1)           | 0(1)            | 7(1)            | 3(1)            |
| C5   | 35(1)           | 32(1)           | 22(1)           | 1(1)            | 13(1)           | 4(1)            |
| C6   | 27(1)           | 29(1)           | 29(1)           | -1(1)           | 16(1)           | 3(1)            |
| C7   | 20(1)           | 20(1)           | 26(1)           | -1(1)           | 6(1)            | 0(1)            |
| C8   | 22(1)           | 25(1)           | 27(1)           | -3(1)           | 6(1)            | -1(1)           |
| C9   | 21(1)           | 22(1)           | 25(1)           | 2(1)            | 11(1)           | -2(1)           |
| C10  | 26(1)           | 37(1)           | 27(1)           | 6(1)            | 8(1)            | 6(1)            |
| C11  | 36(1)           | 39(1)           | 27(1)           | 8(1)            | 16(1)           | 7(1)            |
| C12  | 32(1)           | 25(1)           | 41(1)           | 7(1)            | 21(1)           | 2(1)            |
| C13  | 21(1)           | 37(1)           | 43(1)           | 2(1)            | 10(1)           | 2(1)            |
| C14  | 25(1)           | 33(1)           | 27(1)           | 0(1)            | 4(1)            | -1(1)           |
| C15  | 41(1)           | 50(2)           | 54(1)           | 8(1)            | 30(1)           | 9(1)            |
| C16  | 21(1)           | 22(1)           | 20(1)           | -1(1)           | 7(1)            | 1(1)            |

Table 5. Hydrogen coordinates ( $\times 10^4$ ) and isotropic displacement parameters ( $\text{\AA}^2 \times 10^3$ ) for 1.

|      | x        | y        | z        | U(eq) |
|------|----------|----------|----------|-------|
| H17A | 7689     | 887      | 2126     | 34    |
| H18A | 7642     | 2884     | 2025     | 35    |
| H19A | 6079     | 3725     | 2705     | 41    |
| H17B | 7737     | 2560     | 1894     | 32    |
| H18B | 7497     | 646      | 2319     | 37    |
| H19B | 5877     | 470      | 3147     | 44    |
| H1   | 3692     | 2502     | 3105     | 23    |
| H2   | 5033     | 4031     | 3776     | 25    |
| H4   | 4858     | 3488     | 5889     | 31    |
| H5   | 3047     | 3939     | 6371     | 35    |
| H6   | 990      | 4359     | 5295     | 32    |
| H8A  | 6543     | 3935     | 5240     | 37    |
| H8B  | 7005     | 3152     | 4571     | 37    |
| H8C  | 6323     | 2623     | 5251     | 37    |
| H10  | 3539     | 835      | 5667     | 36    |
| H11  | 2136     | 1303     | 6494     | 39    |
| H13  | -881     | 1771     | 4204     | 40    |
| H14  | 506      | 1302     | 3365     | 35    |
| H15A | -522     | 2717     | 5950     | 67    |
| H15B | -10      | 1672     | 6594     | 67    |
| H15C | -1276    | 1553     | 5718     | 67    |
| H2N  | 5040(20) | 1189(18) | 4472(14) | 22(6) |

Table 6. Torsion angles [°] for 1.

|                    |             |                   |             |
|--------------------|-------------|-------------------|-------------|
| C1-N2-S1-O1        | 25.20(17)   | C14-C9-C10-C11    | 0.6(3)      |
| C1-N2-S1-O2        | 154.31(14)  | S1-C9-C10-C11     | -175.70(17) |
| C1-N2-S1-C9        | -92.22(16)  | C9-C10-C11-C12    | -0.2(3)     |
| C16-S2-C17-C18     | -0.02(15)   | C10-C11-C12-C13   | -0.2(3)     |
| S2-C17-C18-C19     | 0.0(2)      | C10-C11-C12-C15   | -178.6(2)   |
| C17-C18-C19-C16    | 0.1(4)      | C11-C12-C13-C14   | 0.3(3)      |
| C16-S2A-C17A-C18A  | 0.14(15)    | C15-C12-C13-C14   | 178.7(2)    |
| S2A-C17A-C18A-C19A | 0.07(19)    | C12-C13-C14-C9    | 0.1(3)      |
| C17A-C18A-C19A-C16 | -0.3(4)     | C10-C9-C14-C13    | -0.6(3)     |
| S1-N2-C1-C16       | -109.45(16) | S1-C9-C14-C13     | 175.66(16)  |
| S1-N2-C1-C2        | 126.58(14)  | C18A-C19A-C16-C19 | -3.9(6)     |
| N2-C1-C2-C3        | -64.89(18)  | C18A-C19A-C16-C1  | -177.6(4)   |
| C16-C1-C2-C3       | 171.87(14)  | C18A-C19A-C16-S2A | 0.4(4)      |
| N2-C1-C2-C8        | 62.57(19)   | C18A-C19A-C16-S2  | 140(5)      |
| C16-C1-C2-C8       | -60.66(19)  | C18-C19-C16-C19A  | 3.4(6)      |
| C7-N1-C3-C4        | -0.4(3)     | C18-C19-C16-C1    | 177.0(4)    |
| C7-N1-C3-C2        | -179.89(16) | C18-C19-C16-S2A   | -147(3)     |
| C8-C2-C3-N1        | 171.87(15)  | C18-C19-C16-S2    | -0.1(4)     |
| C1-C2-C3-N1        | -61.70(19)  | N2-C1-C16-C19A    | 11.4(4)     |
| C8-C2-C3-C4        | -7.6(3)     | C2-C1-C16-C19A    | 135.4(4)    |
| C1-C2-C3-C4        | 118.82(19)  | N2-C1-C16-C19     | -160.9(4)   |
| N1-C3-C4-C5        | 0.4(3)      | C2-C1-C16-C19     | -36.9(4)    |
| C2-C3-C4-C5        | 179.79(18)  | N2-C1-C16-S2A     | -166.49(16) |
| C3-C4-C5-C6        | 0.3(3)      | C2-C1-C16-S2A     | -42.5(2)    |
| C4-C5-C6-C7        | -0.9(3)     | N2-C1-C16-S2      | 15.9(2)     |
| C3-N1-C7-C6        | -0.2(3)     | C2-C1-C16-S2      | 139.88(17)  |
| C3-N1-C7-Br1       | 178.71(12)  | C17A-S2A-C16-C19A | -0.3(3)     |
| C5-C6-C7-N1        | 0.9(3)      | C17A-S2A-C16-C19  | 31(3)       |
| C5-C6-C7-Br1       | -178.04(15) | C17A-S2A-C16-C1   | 177.8(3)    |
| O1-S1-C9-C10       | -178.62(15) | C17A-S2A-C16-S2   | -4.4(3)     |
| O2-S1-C9-C10       | 51.81(17)   | C17-S2-C16-C19A   | -37(5)      |
| N2-S1-C9-C10       | -61.24(18)  | C17-S2-C16-C19    | 0.1(3)      |
| O1-S1-C9-C14       | 5.07(19)    | C17-S2-C16-C1     | -177.2(3)   |
| O2-S1-C9-C14       | -124.51(16) | C17-S2-C16-S2A    | 5.1(3)      |
| N2-S1-C9-C14       | 122.45(17)  |                   |             |

Table 7. Observed and calculated structure factors for 3F

Page 1

| h | k   | l   | 10Fo | 10Fc | 10s | h | k   | l   | 10Fo | 10Fc | 10s | h | k   | l   | 10Fo | 10Fc | 10s |
|---|-----|-----|------|------|-----|---|-----|-----|------|------|-----|---|-----|-----|------|------|-----|
| 1 | 554 | 563 | 4    | 7    | 4   | 1 | 628 | 627 | 4    | -1   | 8   | 1 | 46  | 49  | 17   |      |     |
| 1 | 149 | 156 | 1    | 8    | 4   | 1 | 112 | 115 | 4    | 0    | 8   | 1 | 672 | 667 | 5    |      |     |
| 1 | 224 | 221 | 1    | 9    | 4   | 1 | 227 | 226 | 9    | 1    | 8   | 1 | 283 | 296 | 2    |      |     |
| 1 | 671 | 696 | 7    | 10   | 4   | 1 | 377 | 377 | 4    | 2    | 8   | 1 | 568 | 559 | 3    |      |     |
| 1 | 0   | 64  | 1    | 11   | 4   | 1 | 396 | 389 | 7    | 3    | 8   | 1 | 349 | 350 | 2    |      |     |
| 1 | 158 | 150 | 1    | 12   | 4   | 1 | 84  | 44  | 27   | 4    | 8   | 1 | 270 | 278 | 2    |      |     |
| 1 | 813 | 832 | 4    | -12  | 5   | 1 | 101 | 93  | 14   | 5    | 8   | 1 | 378 | 381 | 3    |      |     |
| 1 | 216 | 215 | 1    | -11  | 5   | 1 | 58  | 54  | 24   | 6    | 8   | 1 | 51  | 59  | 16   |      |     |
| 1 | 202 | 213 | 1    | -10  | 5   | 1 | 203 | 202 | 6    | 7    | 8   | 1 | 330 | 328 | 5    |      |     |
| 1 | 618 | 627 | 3    | -9   | 5   | 1 | 159 | 167 | 3    | 8    | 8   | 1 | 310 | 306 | 6    |      |     |
| 1 | 573 | 572 | 3    | -8   | 5   | 1 | 273 | 277 | 4    | 9    | 8   | 1 | 0   | 16  | 1    |      |     |
| 1 | 494 | 489 | 3    | -7   | 5   | 1 | 459 | 456 | 3    | 10   | 8   | 1 | 126 | 122 | 16   |      |     |
| 1 | 828 | 818 | 6    | -6   | 5   | 1 | 194 | 203 | 4    | 11   | 8   | 1 | 0   | 19  | 1    |      |     |
| 1 | 131 | 130 | 2    | -5   | 5   | 1 | 235 | 222 | 6    | -10  | 9   | 1 | 23  | 27  | 23   |      |     |
| 1 | 242 | 248 | 2    | -4   | 5   | 1 | 70  | 72  | 1    | -9   | 9   | 1 | 12  | 22  | 12   |      |     |
| 1 | 478 | 472 | 5    | -3   | 5   | 1 | 230 | 234 | 1    | -8   | 9   | 1 | 249 | 246 | 10   |      |     |
| 1 | 351 | 345 | 6    | -2   | 5   | 1 | 377 | 367 | 2    | -7   | 9   | 1 | 62  | 67  | 16   |      |     |
| 1 | 153 | 146 | 6    | -1   | 5   | 1 | 146 | 150 | 1    | -6   | 9   | 1 | 55  | 14  | 20   |      |     |
| 1 | 389 | 392 | 4    | 0    | 5   | 1 | 30  | 14  | 7    | -5   | 9   | 1 | 159 | 160 | 5    |      |     |
| 1 | 31  | 36  | 30   | 1    | 5   | 1 | 332 | 325 | 2    | -4   | 9   | 1 | 347 | 342 | 2    |      |     |
| 1 | 89  | 91  | 2    | 2    | 5   | 1 | 307 | 308 | 2    | -3   | 9   | 1 | 352 | 348 | 3    |      |     |
| 1 | 894 | 881 | 6    | 3    | 5   | 1 | 146 | 135 | 3    | -2   | 9   | 1 | 38  | 28  | 8    |      |     |
| 1 | 74  | 80  | 2    | 4    | 5   | 1 | 178 | 172 | 1    | -1   | 9   | 1 | 575 | 583 | 5    |      |     |
| 1 | 627 | 623 | 4    | 5    | 5   | 1 | 282 | 275 | 2    | 0    | 9   | 1 | 52  | 39  | 6    |      |     |
| 1 | 427 | 438 | 2    | 6    | 5   | 1 | 225 | 219 | 2    | 1    | 9   | 1 | 218 | 221 | 2    |      |     |
| 1 | 93  | 90  | 1    | 7    | 5   | 1 | 85  | 98  | 1    | 2    | 9   | 1 | 714 | 708 | 5    |      |     |
| 1 | 447 | 438 | 3    | 8    | 5   | 1 | 36  | 30  | 9    | 3    | 9   | 1 | 193 | 199 | 5    |      |     |
| 1 | 556 | 569 | 3    | 9    | 5   | 1 | 129 | 141 | 5    | 4    | 9   | 1 | 131 | 137 | 4    |      |     |
| 1 | 773 | 776 | 6    | 10   | 5   | 1 | 268 | 268 | 4    | 5    | 9   | 1 | 392 | 385 | 5    |      |     |

|     |      |      |      |      |     |     |      |      |     |     |    |     |     |     |    |
|-----|------|------|------|------|-----|-----|------|------|-----|-----|----|-----|-----|-----|----|
| 4   | 2    | 0    | 626  | 632  | 4   | 7   | 9    | 0    | 20  | 17  | 20 | 0   | 2   |     |    |
| 1   | 102  | 99   | 3    | 11   | 5   | 1   | 87   | 82   | 12  | 6   | 9  | 1   | 124 |     |    |
| 124 | 3    | 5    | 2    | 0    | 617 | 609 | 4    | 8    | 9   | 0   | 91 | 92  | 13  | 1   | 2  |
| 1   | 958  | 985  | 6    | 12   | 5   | 1   | 90   | 85   | 17  | 7   | 9  | 1   | 88  | 95  | 10 |
| 6   | 2    | 0    | 799  | 802  | 4   | 9   | 9    | 0    | 130 | 140 | 9  | 2   | 2   |     |    |
| 1   | 918  | 892  | 4    | -11  | 6   | 1   | 329  | 316  | 16  | 8   | 9  | 1   | 213 | 203 | 7  |
| 7   | 2    | 0    | 504  | 503  | 3   | 10  | 9    | 0    | 116 | 69  | 14 | 3   | 2   |     |    |
| 1   | 42   | 38   | 2    | -10  | 6   | 1   | 361  | 367  | 6   | 9   | 9  | 1   | 154 | 145 | 17 |
| 8   | 2    | 0    | 411  | 410  | 2   | 0   | 10   | 0    | 671 | 654 | 9  | 4   | 2   |     |    |
| 1   | 513  | 513  | 2    | -9   | 6   | 1   | 372  | 354  | 6   | 10  | 9  | 1   | 85  | 102 | 19 |
| 9   | 2    | 0    | 483  | 476  | 3   | 1   | 10   | 0    | 257 | 264 | 3  | 5   | 2   |     |    |
| 1   | 793  | 772  | 4    | -8   | 6   | 1   | 532  | 517  | 5   | -10 | 10 | 1   | 180 | 175 | 11 |
| 10  | 2    | 0    | 408  | 404  | 3   | 2   | 10   | 0    | 538 | 529 | 4  | 6   | 2   |     |    |
| 1   | 390  | 377  | 2    | -7   | 6   | 1   | 426  | 424  | 3   | -9  | 10 | 1   | 143 | 151 | 16 |
| 11  | 2    | 0    | 122  | 127  | 6   | 3   | 10   | 0    | 596 | 588 | 5  | 7   | 2   |     |    |
| 1   | 316  | 319  | 2    | -6   | 6   | 1   | 641  | 634  | 5   | -8  | 10 | 1   | 207 | 195 | 6  |
| 12  | 2    | 0    | 442  | 433  | 7   | 4   | 10   | 0    | 346 | 337 | 3  | 8   | 2   |     |    |
| 1   | 71   | 69   | 3    | -5   | 6   | 1   | 1027 | 1003 | 9   | -7  | 10 | 1   | 68  | 51  | 22 |
| 1   | 3    | 0    | 1886 | 1881 | 15  | 5   | 10   | 0    | 144 | 147 | 2  | 9   | 2   |     |    |
| 1   | 47   | 51   | 5    | -4   | 6   | 1   | 148  | 157  | 1   | -6  | 10 | 1   | 201 | 206 | 5  |
| 2   | 3    | 0    | 294  | 278  | 3   | 6   | 10   | 0    | 509 | 509 | 6  | 10  | 2   |     |    |
| 1   | 247  | 249  | 3    | -3   | 6   | 1   | 985  | 970  | 6   | -5  | 10 | 1   | 123 | 124 | 6  |
| 3   | 3    | 0    | 658  | 634  | 4   | 7   | 10   | 0    | 228 | 241 | 9  | 11  | 2   |     |    |
| 1   | 101  | 97   | 6    | -2   | 6   | 1   | 1400 | 1397 | 17  | -4  | 10 | 1   | 350 | 350 | 4  |
| 4   | 3    | 0    | 362  | 382  | 2   | 8   | 10   | 0    | 140 | 143 | 8  | 12  | 2   |     |    |
| 1   | 100  | 97   | 8    | -1   | 6   | 1   | 623  | 612  | 5   | -3  | 10 | 1   | 194 | 188 | 5  |
| 5   | 3    | 0    | 386  | 375  | 2   | 9   | 10   | 0    | 342 | 355 | 12 | -13 | 3   |     |    |
| 1   | 58   | 12   | 27   | 0    | 6   | 1   | 678  | 673  | 5   | -2  | 10 | 1   | 355 | 352 | 8  |
| 6   | 3    | 0    | 144  | 145  | 1   | 10  | 10   | 0    | 195 | 215 | 12 | -12 | 3   |     |    |
| 1   | 29   | 23   | 28   | 1    | 6   | 1   | 823  | 820  | 5   | -1  | 10 | 1   | 285 | 284 | 3  |
| 7   | 3    | 0    | 436  | 445  | 2   | 1   | 11   | 0    | 41  | 36  | 25 | -11 | 3   |     |    |
| 1   | 53   | 48   | 9    | 2    | 6   | 1   | 424  | 427  | 2   | 0   | 10 | 1   | 51  | 16  | 51 |
| 8   | 3    | 0    | 201  | 202  | 1   | 2   | 11   | 0    | 35  | 32  | 18 | -10 | 3   |     |    |
| 1   | 73   | 74   | 4    | 3    | 6   | 1   | 516  | 502  | 3   | 1   | 10 | 1   | 153 | 168 | 5  |
| 9   | 3    | 0    | 50   | 50   | 2   | 3   | 11   | 0    | 40  | 36  | 39 | -9  | 3   |     |    |
| 1   | 122  | 127  | 3    | 4    | 6   | 1   | 493  | 498  | 3   | 2   | 10 | 1   | 202 | 217 | 2  |
| 10  | 3    | 0    | 189  | 185  | 3   | 4   | 11   | 0    | 0   | 20  | 1  | -8  | 3   |     |    |
| 1   | 159  | 168  | 1    | 5    | 6   | 1   | 479  | 476  | 4   | 3   | 10 | 1   | 172 | 167 | 3  |
| 11  | 3    | 0    | 12   | 41   | 12  | 5   | 11   | 0    | 64  | 55  | 10 | -7  | 3   |     |    |
| 1   | 331  | 334  | 2    | 6    | 6   | 1   | 141  | 144  | 3   | 4   | 10 | 1   | 81  | 83  | 5  |
| 12  | 3    | 0    | 131  | 138  | 7   | 6   | 11   | 0    | 110 | 93  | 11 | -6  | 3   |     |    |
| 1   | 229  | 216  | 1    | 7    | 6   | 1   | 222  | 221  | 2   | 5   | 10 | 1   | 121 | 125 | 3  |
| 0   | 4    | 0    | 1400 | 1371 | 15  | 7   | 11   | 0    | 205 | 211 | 9  | -5  | 3   |     |    |
| 1   | 291  | 286  | 2    | 8    | 6   | 1   | 508  | 502  | 7   | 6   | 10 | 1   | 34  | 26  | 34 |
| 1   | 4    | 0    | 477  | 481  | 3   | 8   | 11   | 0    | 159 | 131 | 11 | -4  | 3   |     |    |
| 1   | 817  | 814  | 5    | 9    | 6   | 1   | 0    | 31   | 1   | 7   | 10 | 1   | 137 | 138 | 8  |
| 2   | 4    | 0    | 642  | 629  | 5   | 9   | 11   | 0    | 62  | 43  | 40 | -3  | 3   |     |    |
| 1   | 602  | 588  | 3    | 10   | 6   | 1   | 356  | 355  | 7   | 8   | 10 | 1   | 78  | 42  | 20 |
| 3   | 4    | 0    | 372  | 387  | 2   | 0   | 12   | 0    | 289 | 293 | 13 | -2  | 3   |     |    |
| 1   | 800  | 811  | 5    | 11   | 6   | 1   | 243  | 250  | 7   | 9   | 10 | 1   | 0   | 8   | 1  |
| 4   | 4    | 0    | 297  | 306  | 2   | 1   | 12   | 0    | 210 | 205 | 4  | -1  | 3   |     |    |
| 1   | 1797 | 1811 | 21   | -11  | 7   | 1   | 284  | 267  | 9   | -9  | 11 | 1   | 48  | 48  | 48 |
| 5   | 4    | 0    | 70   | 87   | 2   | 2   | 12   | 0    | 214 | 214 | 3  | 0   | 3   |     |    |
| 1   | 331  | 333  | 2    | -10  | 7   | 1   | 7    | 41   | 6   | -8  | 11 | 1   | 131 | 136 | 10 |
| 6   | 4    | 0    | 464  | 454  | 3   | 3   | 12   | 0    | 403 | 400 | 4  | 1   | 3   |     |    |
| 1   | 1303 | 1299 | 11   | -9   | 7   | 1   | 95   | 90   | 9   | -7  | 11 | 1   | 102 | 104 | 11 |
| 7   | 4    | 0    | 226  | 229  | 2   | 4   | 12   | 0    | 210 | 194 | 6  | 2   | 3   |     |    |
| 1   | 948  | 947  | 5    | -8   | 7   | 1   | 104  | 111  | 4   | -6  | 11 | 1   | 181 | 189 | 11 |
| 8   | 4    | 0    | 104  | 108  | 1   | 5   | 12   | 0    | 132 | 116 | 9  | 3   | 3   |     |    |
| 1   | 555  | 539  | 3    | -7   | 7   | 1   | 275  | 280  | 3   | -5  | 11 | 1   | 177 | 185 | 6  |
| 9   | 4    | 0    | 516  | 499  | 4   | 6   | 12   | 0    | 178 | 162 | 8  | 4   | 3   |     |    |
| 1   | 650  | 634  | 3    | -6   | 7   | 1   | 129  | 136  | 8   | -4  | 11 | 1   | 204 | 210 | 3  |

|     |      |      |     |     |    |     |     |     |     |     |    |     |     |
|-----|------|------|-----|-----|----|-----|-----|-----|-----|-----|----|-----|-----|
| 10  | 4    | 0    | 67  | 59  | 16 | 7   | 12  | 0   | 245 | 239 | 23 | 5   | 3   |
| 1   | 542  | 534  | 3   | -5  | 7  | 1   | 117 | 117 | 1   | -3  | 11 | 1   | 181 |
| 187 | 2    |      |     |     |    |     |     |     |     |     |    |     |     |
| 11  | 4    | 0    | 76  | 82  | 7  | 8   | 12  | 0   | 82  | 59  | 23 | 6   | 3   |
| 1   | 435  | 439  | 2   | -4  | 7  | 1   | 518 | 513 | 3   | -2  | 11 | 1   | 130 |
| 124 | 4    |      |     |     |    |     |     |     |     |     |    |     |     |
| 12  | 4    | 0    | 78  | 50  | 29 | 1   | 13  | 0   | 191 | 183 | 4  | 7   | 3   |
| 1   | 336  | 341  | 2   | -3  | 7  | 1   | 583 | 568 | 3   | -1  | 11 | 1   | 327 |
| 325 | 5    |      |     |     |    |     |     |     |     |     |    |     |     |
| 1   | 5    | 0    | 194 | 202 | 1  | 2   | 13  | 0   | 274 | 268 | 4  | 8   | 3   |
| 1   | 114  | 106  | 4   | -2  | 7  | 1   | 176 | 183 | 2   | 0   | 11 | 1   | 113 |
| 114 | 4    |      |     |     |    |     |     |     |     |     |    |     |     |
| 2   | 5    | 0    | 61  | 32  | 4  | 3   | 13  | 0   | 160 | 168 | 6  | 9   | 3   |
| 1   | 465  | 465  | 3   | -1  | 7  | 1   | 976 | 956 | 7   | 1   | 11 | 1   | 183 |
| 186 | 2    |      |     |     |    |     |     |     |     |     |    |     |     |
| 3   | 5    | 0    | 446 | 427 | 2  | 4   | 13  | 0   | 115 | 101 | 17 | 10  | 3   |
| 1   | 92   | 96   | 4   | 0   | 7  | 1   | 47  | 39  | 5   | 2   | 11 | 1   | 346 |
| 348 | 3    |      |     |     |    |     |     |     |     |     |    |     |     |
| 4   | 5    | 0    | 441 | 437 | 2  | 5   | 13  | 0   | 146 | 157 | 13 | 11  | 3   |
| 1   | 377  | 376  | 6   | 1   | 7  | 1   | 428 | 427 | 5   | 3   | 11 | 1   | 128 |
| 129 | 4    |      |     |     |    |     |     |     |     |     |    |     |     |
| 5   | 5    | 0    | 127 | 134 | 2  | 6   | 13  | 0   | 71  | 58  | 31 | 12  | 3   |
| 1   | 163  | 169  | 7   | 2   | 7  | 1   | 320 | 309 | 2   | 4   | 11 | 1   | 216 |
| 223 | 2    |      |     |     |    |     |     |     |     |     |    |     |     |
| 6   | 5    | 0    | 68  | 68  | 2  | 7   | 13  | 0   | 84  | 31  | 36 | -12 | 4   |
| 1   | 387  | 380  | 9   | 3   | 7  | 1   | 101 | 97  | 2   | 5   | 11 | 1   | 369 |
| 358 | 7    |      |     |     |    |     |     |     |     |     |    |     |     |
| 7   | 5    | 0    | 422 | 422 | 3  | 0   | 14  | 0   | 101 | 120 | 15 | -11 | 4   |
| 1   | 614  | 596  | 9   | 4   | 7  | 1   | 57  | 52  | 3   | 6   | 11 | 1   | 48  |
| 37  | 41   |      |     |     |    |     |     |     |     |     |    |     |     |
| 8   | 5    | 0    | 43  | 30  | 3  | 1   | 14  | 0   | 137 | 134 | 6  | -10 | 4   |
| 1   | 79   | 88   | 6   | 5   | 7  | 1   | 286 | 284 | 2   | 7   | 11 | 1   | 147 |
| 128 | 9    |      |     |     |    |     |     |     |     |     |    |     |     |
| 9   | 5    | 0    | 128 | 137 | 3  | 2   | 14  | 0   | 71  | 42  | 13 | -9  | 4   |
| 1   | 673  | 646  | 5   | 6   | 7  | 1   | 145 | 136 | 5   | 8   | 11 | 1   | 396 |
| 385 | 11   |      |     |     |    |     |     |     |     |     |    |     |     |
| 10  | 5    | 0    | 341 | 339 | 5  | 3   | 14  | 0   | 245 | 222 | 6  | -8  | 4   |
| 1   | 534  | 534  | 4   | 7   | 7  | 1   | 57  | 69  | 17  | 9   | 11 | 1   | 103 |
| 96  | 19   |      |     |     |    |     |     |     |     |     |    |     |     |
| 11  | 5    | 0    | 55  | 70  | 55 | 4   | 14  | 0   | 130 | 136 | 7  | -7  | 4   |
| 1   | 608  | 598  | 4   | 8   | 7  | 1   | 46  | 28  | 10  | -8  | 12 | 1   | 108 |
| 88  | 19   |      |     |     |    |     |     |     |     |     |    |     |     |
| 12  | 5    | 0    | 51  | 36  | 50 | 5   | 14  | 0   | 85  | 78  | 15 | -6  | 4   |
| 1   | 847  | 835  | 5   | 9   | 7  | 1   | 43  | 30  | 43  | -7  | 12 | 1   | 276 |
| 267 | 8    |      |     |     |    |     |     |     |     |     |    |     |     |
| 0   | 6    | 0    | 657 | 628 | 9  | 1   | 15  | 0   | 69  | 48  | 20 | -5  | 4   |
| 1   | 412  | 416  | 3   | 10  | 7  | 1   | 58  | 69  | 57  | -6  | 12 | 1   | 231 |
| 243 | 6    |      |     |     |    |     |     |     |     |     |    |     |     |
| 1   | 6    | 0    | 135 | 149 | 2  | 2   | 15  | 0   | 82  | 93  | 14 | -4  | 4   |
| 1   | 574  | 576  | 4   | 11  | 7  | 1   | 220 | 232 | 7   | -5  | 12 | 1   | 56  |
| 69  | 55   |      |     |     |    |     |     |     |     |     |    |     |     |
| 2   | 6    | 0    | 868 | 844 | 8  | 3   | 15  | 0   | 48  | 65  | 32 | -3  | 4   |
| 1   | 623  | 606  | 4   | -11 | 8  | 1   | 245 | 243 | 11  | -4  | 12 | 1   | 202 |
| 210 | 4    |      |     |     |    |     |     |     |     |     |    |     |     |
| 3   | 6    | 0    | 21  | 14  | 13 | -13 | 1   | 1   | 61  | 47  | 36 | -2  | 4   |
| 1   | 1164 | 1171 | 9   | -10 | 8  | 1   | 300 | 307 | 7   | -3  | 12 | 1   | 51  |
| 44  | 14   |      |     |     |    |     |     |     |     |     |    |     |     |
| 4   | 6    | 0    | 178 | 164 | 2  | -12 | 1   | 1   | 63  | 72  | 19 | -1  | 4   |
| 1   | 1170 | 1176 | 9   | -9  | 8  | 1   | 239 | 244 | 7   | -2  | 12 | 1   | 143 |
| 145 | 3    |      |     |     |    |     |     |     |     |     |    |     |     |
| 5   | 6    | 0    | 80  | 72  | 2  | -11 | 1   | 1   | 30  | 27  | 17 | 0   | 4   |
| 1   | 67   | 62   | 5   | -8  | 8  | 1   | 270 | 259 | 7   | -1  | 12 | 1   | 67  |
| 72  | 7    |      |     |     |    |     |     |     |     |     |    |     |     |
| 6   | 6    | 0    | 39  | 41  | 6  | -10 | 1   | 1   | 267 | 266 | 2  | 1   | 4   |
| 1   | 884  | 897  | 5   | -7  | 8  | 1   | 67  | 69  | 10  | 0   | 12 | 1   | 258 |
| 253 | 3    |      |     |     |    |     |     |     |     |     |    |     |     |
| 7   | 6    | 0    | 255 | 250 | 7  | -9  | 1   | 1   | 247 | 249 | 2  | 2   | 4   |
| 1   | 967  | 953  | 7   | -6  | 8  | 1   | 307 | 306 | 3   | 1   | 12 | 1   | 258 |
| 269 | 4    |      |     |     |    |     |     |     |     |     |    |     |     |
| 8   | 6    | 0    | 115 | 127 | 4  | -8  | 1   | 1   | 4   | 16  | 4  | 3   | 4   |
| 1   | 152  | 140  | 2   | -5  | 8  | 1   | 590 | 581 | 5   | 2   | 12 | 1   | 87  |
| 94  | 5    |      |     |     |    |     |     |     |     |     |    |     |     |
| 9   | 6    | 0    | 65  | 85  | 19 | -7  | 1   | 1   | 422 | 419 | 2  | 4   | 4   |
| 1   | 995  | 1003 | 6   | -4  | 8  | 1   | 218 | 214 | 2   | 3   | 12 | 1   | 100 |
| 103 | 4    |      |     |     |    |     |     |     |     |     |    |     |     |
| 10  | 6    | 0    | 30  | 30  | 30 | -6  | 1   | 1   | 161 | 148 | 1  | 5   | 4   |
| 1   | 584  | 578  | 3   | -3  | 8  | 1   | 348 | 346 | 2   | 4   | 12 | 1   | 180 |
| 184 | 4    |      |     |     |    |     |     |     |     |     |    |     |     |
| 11  | 6    | 0    | 45  | 60  | 45 | -5  | 1   | 1   | 288 | 292 | 3  | 6   | 4   |
| 1   | 237  | 242  | 1   | -2  | 8  | 1   | 483 | 492 | 4   | 5   | 12 | 1   | 215 |
| 216 | 5    |      |     |     |    |     |     |     |     |     |    |     |     |



11 0 2 34 20 33 -6 4 2 339 352 2 9 7  
2 392 385 9 -6 12 2 382 373 8 1 2 3 59  
61 2  
12 0 2 0 43 1 -5 4 2 90 93 2 10 7  
2 289 282 7 -5 12 2 56 44 56 2 2 3 383  
389 2  
-13 1 2 180 165 14 -4 4 2 573 561 4 11 7  
2 138 147 14 -4 12 2 489 500 6 3 2 3 86  
78 1  
-12 1 2 66 60 11 -3 4 2 97 104 4 -11 8  
2 60 54 31 -3 12 2 167 160 5 4 2 3 298  
276 1  
-11 1 2 293 297 7 -2 4 2 30 22 5 -10 8  
2 319 319 7 -2 12 2 34 25 22 5 2 3 317  
310 3  
-10 1 2 55 57 4 -1 4 2 317 335 2 -9 8  
2 0 17 1 -1 12 2 402 400 6 6 2 3 140  
137 1  
-9 1 2 114 121 2 0 4 2 1223 1198 7 -8 8  
2 337 329 10 0 12 2 103 101 4 7 2 3 62  
64 5  
-8 1 2 451 444 4 1 4 2 38 33 4 -7 8  
2 360 356 4 1 12 2 178 179 3 8 2 3 384  
391 2  
-7 1 2 70 64 3 2 4 2 404 402 4 -6 8  
2 49 46 9 2 12 2 254 260 3 9 2 3 194  
208 2  
-6 1 2 184 182 1 3 4 2 20 15 6 -5 8  
2 110 111 6 3 12 2 70 83 11 10 2 3 63  
72 7  
-5 1 2 221 219 1 4 4 2 224 215 1 -4 8  
2 388 389 3 4 12 2 15 37 15 11 2 3 178  
181 4  
-4 1 2 98 94 1 5 4 2 314 291 3 -3 8  
2 51 45 5 5 12 2 0 26 1 12 2 3 132  
127 15  
-3 1 2 229 233 1 6 4 2 43 33 5 -2 8  
2 60 62 4 6 12 2 126 131 10 -13 3 3 87  
87 11  
-2 1 2 128 134 1 7 4 2 17 4 16 -1 8  
2 300 298 2 7 12 2 56 70 56 -12 3 3 201  
207 6  
-1 1 2 628 639 9 8 4 2 120 126 4 0 8  
2 353 346 2 -7 13 2 212 213 10 -11 3 3 243  
253 3  
0 1 2 1144 1176 10 9 4 2 38 40 8 1 8  
2 262 262 4 -6 13 2 78 57 15 -10 3 3 309  
318 3  
1 1 2 1584 1628 8 10 4 2 52 45 11 2 8  
2 315 318 4 -5 13 2 129 125 18 -9 3 3 229  
235 2  
2 1 2 1088 1110 7 11 4 2 0 8 1 3 8  
2 304 295 2 -4 13 2 93 90 8 -8 3 3 389  
384 3  
3 1 2 222 202 1 12 4 2 44 36 43 4 8  
2 167 168 2 -3 13 2 337 357 5 -7 3 3 448  
446 2  
4 1 2 518 508 3 -12 5 2 257 264 10 5 8  
2 574 573 4 -2 13 2 0 14 1 -6 3 3 54  
55 6  
5 1 2 56 40 1 -11 5 2 90 80 13 6 8  
2 169 179 2 -1 13 2 48 18 48 -5 3 3 1254  
1232 8  
6 1 2 153 169 4 -10 5 2 258 257 8 7 8  
2 117 122 14 0 13 2 199 210 4 -4 3 3 179  
198 1  
7 1 2 265 268 2 -9 5 2 346 348 3 8 8  
2 136 151 8 1 13 2 108 115 5 -3 3 3 497  
514 3  
8 1 2 121 118 1 -8 5 2 101 103 2 9 8  
2 107 103 11 2 13 2 77 82 20 -2 3 3 1232  
1246 10  
9 1 2 428 436 7 -7 5 2 707 698 5 10 8  
2 61 67 18 3 13 2 155 163 7 -1 3 3 126  
139 1  
10 1 2 239 240 3 -6 5 2 510 520 4 -11 9  
2 84 71 39 4 13 2 98 86 13 0 3 3 804  
810 4  
11 1 2 40 44 40 -5 5 2 185 192 2 -10 9  
2 101 44 22 5 13 2 120 105 14 1 3 3 509  
541 4





```

-11 6 3 56 62 22 9 9 3 184 188 16 -11 0
4 34 14 21 1 3 4 253 242 1 -7 7 4 297
304 12
-10 6 3 227 216 7 -10 10 3 109 61 18 -10 0
4 48 58 9 2 3 4 372 379 2 -6 7 4 516
514 11
-9 6 3 55 48 12 -9 10 3 48 43 34 -9 0
4 513 507 5 3 3 4 886 866 4 -5 7 4 248
242 3
-8 6 3 166 172 3 -8 10 3 15 64 15 -8 0
4 549 547 5 4 3 4 97 100 3 -4 7 4 512
522 3
-7 6 3 93 112 7 -7 10 3 84 86 14 -7 0
4 108 112 3 5 3 4 595 597 3 -3 7 4 552
546 6
-6 6 3 471 467 4 -6 10 3 71 102 11 -6 0
4 1055 1035 11 6 3 4 314 308 2 -2 7 4 259
254 1
-5 6 3 31 25 8 -5 10 3 63 57 8 -5 0
4 875 831 8 7 3 4 102 104 5 -1 7 4 731
718 5
-4 6 3 213 204 10 -4 10 3 128 125 2 -4 0
4 357 367 3 8 3 4 465 462 3 0 7 4 514
515 3
-3 6 3 601 583 4 -3 10 3 343 339 4 -3 0
4 1143 1143 9 9 3 4 197 195 3 1 7 4 639
614 4
-2 6 3 284 274 2 -2 10 3 335 330 4 -2 0
4 349 335 2 10 3 4 77 74 6 2 7 4 568
571 4
-1 6 3 306 302 3 -1 10 3 103 90 4 -1 0
4 871 878 7 11 3 4 123 119 9 3 7 4 333
334 2
0 6 3 25 35 9 0 10 3 33 19 17 0 0
4 587 600 4 -12 4 4 42 34 34 4 7 4 331
329 2
1 6 3 101 98 2 1 10 3 9 2 9 1 0
4 658 658 4 -11 4 4 191 197 5 5 7 4 660
653 4
2 6 3 479 482 3 2 10 3 44 36 7 2 0
4 1363 1340 9 -10 4 4 63 61 8 6 7 4 75
66 4
3 6 3 212 202 1 3 10 3 0 34 1 3 0
4 322 307 2 -9 4 4 47 39 6 7 7 4 119
121 4
4 6 3 11 14 10 4 10 3 30 15 30 4 0
4 1191 1174 10 -8 4 4 183 185 2 8 7 4 250
251 11
5 6 3 312 318 2 5 10 3 56 50 9 5 0
4 154 167 2 -7 4 4 114 117 4 9 7 4 173
174 5
6 6 3 34 19 8 6 10 3 36 55 35 6 0
4 615 622 5 -6 4 4 52 57 2 10 7 4 63
44 18
7 6 3 63 65 4 7 10 3 230 237 6 7 0
4 475 477 4 -5 4 4 340 320 2 -10 8 4 140
146 9
8 6 3 227 234 3 8 10 3 61 52 60 8 0
4 110 113 5 -4 4 4 70 73 2 -9 8 4 110
130 11
9 6 3 221 223 5 9 10 3 7 35 7 9 0
4 737 728 10 -3 4 4 281 274 2 -8 8 4 0
11 1
10 6 3 42 33 33 -9 11 3 0 102 1 10 0
4 277 264 4 -2 4 4 285 279 1 -7 8 4 305
312 5
11 6 3 251 246 7 -8 11 3 348 340 8 11 0
4 143 141 10 -1 4 4 55 45 5 -6 8 4 391
399 4
-12 7 3 160 165 15 -7 11 3 139 148 13 -13 1
4 57 19 26 0 4 4 315 319 1 -5 8 4 298
301 2
-11 7 3 57 47 21 -6 11 3 490 472 8 -12 1
4 0 18 1 1 4 4 107 111 1 -4 8 4 214
222 2
-10 7 3 91 88 23 -5 11 3 411 403 6 -11 1
4 192 200 2 2 4 4 234 230 1 -3 8 4 585
579 3
-9 7 3 135 130 16 -4 11 3 152 159 3 -10 1
4 186 188 2 3 4 4 546 552 3 -2 8 4 156
160 2

```

Table 7.Observed and calculated structure factors for 3f

Page 4

| h   | k    | l    | 10Fo | 10Fc | 10s | h   | k   | l   | 10Fo | 10Fc | 10s | h   | k   | l | 10Fo |
|-----|------|------|------|------|-----|-----|-----|-----|------|------|-----|-----|-----|---|------|
| -1  | 8    | 4    | 286  | 297  | 2   | -6  | 13  | 4   | 89   | 70   | 16  | -4  | 3   | 3 |      |
| 5   | 725  | 697  | 4    | -12  | 7   | 5   | 108 | 111 | 16   | -6   | 11  | 5   | 216 |   |      |
| 229 | 6    |      |      |      |     |     |     |     |      |      |     |     |     |   |      |
| 0   | 8    | 4    | 165  | 164  | 2   | -5  | 13  | 4   | 129  | 143  | 9   | -3  | 3   |   |      |
| 5   | 341  | 359  | 2    | -11  | 7   | 5   | 94  | 81  | 13   | -5   | 11  | 5   | 137 |   |      |
| 131 | 5    |      |      |      |     |     |     |     |      |      |     |     |     |   |      |
| 1   | 8    | 4    | 59   | 74   | 5   | -4  | 13  | 4   | 305  | 299  | 6   | -2  | 3   |   |      |
| 5   | 584  | 579  | 3    | -10  | 7   | 5   | 80  | 63  | 12   | -4   | 11  | 5   | 37  |   |      |
| 39  | 37   |      |      |      |     |     |     |     |      |      |     |     |     |   |      |
| 2   | 8    | 4    | 138  | 153  | 2   | -3  | 13  | 4   | 127  | 138  | 13  | -1  | 3   |   |      |
| 5   | 61   | 47   | 2    | -9   | 7   | 5   | 173 | 176 | 10   | -3   | 11  | 5   | 334 |   |      |
| 335 | 4    |      |      |      |     |     |     |     |      |      |     |     |     |   |      |
| 3   | 8    | 4    | 431  | 418  | 3   | -2  | 13  | 4   | 109  | 115  | 5   | 0   | 3   |   |      |
| 5   | 198  | 206  | 1    | -8   | 7   | 5   | 32  | 52  | 32   | -2   | 11  | 5   | 179 |   |      |
| 180 | 9    |      |      |      |     |     |     |     |      |      |     |     |     |   |      |
| 4   | 8    | 4    | 162  | 161  | 2   | -1  | 13  | 4   | 164  | 166  | 7   | 1   | 3   |   |      |
| 5   | 76   | 99   | 2    | -7   | 7   | 5   | 99  | 107 | 2    | -1   | 11  | 5   | 133 |   |      |
| 144 | 3    |      |      |      |     |     |     |     |      |      |     |     |     |   |      |
| 5   | 8    | 4    | 51   | 60   | 4   | 0   | 13  | 4   | 105  | 106  | 14  | 2   | 3   |   |      |
| 5   | 125  | 117  | 4    | -6   | 7   | 5   | 649 | 642 | 6    | 0    | 11  | 5   | 483 |   |      |
| 484 | 4    |      |      |      |     |     |     |     |      |      |     |     |     |   |      |
| 6   | 8    | 4    | 387  | 387  | 5   | 1   | 13  | 4   | 49   | 44   | 14  | 3   | 3   |   |      |
| 5   | 324  | 341  | 1    | -5   | 7   | 5   | 109 | 111 | 2    | 1    | 11  | 5   | 137 |   |      |
| 140 | 3    |      |      |      |     |     |     |     |      |      |     |     |     |   |      |
| 7   | 8    | 4    | 102  | 97   | 7   | 2   | 13  | 4   | 19   | 13   | 18  | 4   | 3   |   |      |
| 5   | 172  | 169  | 1    | -4   | 7   | 5   | 135 | 131 | 2    | 2    | 11  | 5   | 83  |   |      |
| 78  | 14   |      |      |      |     |     |     |     |      |      |     |     |     |   |      |
| 8   | 8    | 4    | 122  | 132  | 7   | 3   | 13  | 4   | 89   | 75   | 9   | 5   | 3   |   |      |
| 5   | 226  | 221  | 2    | -3   | 7   | 5   | 388 | 378 | 10   | 3    | 11  | 5   | 196 |   |      |
| 196 | 3    |      |      |      |     |     |     |     |      |      |     |     |     |   |      |
| 9   | 8    | 4    | 258  | 238  | 7   | 4   | 13  | 4   | 0    | 10   | 1   | 6   | 3   |   |      |
| 5   | 289  | 289  | 2    | -2   | 7   | 5   | 111 | 119 | 1    | 4    | 11  | 5   | 67  |   |      |
| 77  | 9    |      |      |      |     |     |     |     |      |      |     |     |     |   |      |
| 10  | 8    | 4    | 229  | 219  | 7   | 5   | 13  | 4   | 145  | 149  | 12  | 7   | 3   |   |      |
| 5   | 36   | 28   | 8    | -1   | 7   | 5   | 132 | 128 | 2    | 5    | 11  | 5   | 50  |   |      |
| 21  | 49   |      |      |      |     |     |     |     |      |      |     |     |     |   |      |
| -11 | 9    | 4    | 46   | 39   | 46  | -6  | 14  | 4   | 86   | 81   | 35  | 8   | 3   |   |      |
| 5   | 27   | 19   | 16   | 0    | 7   | 5   | 34  | 17  | 7    | 6    | 11  | 5   | 71  |   |      |
| 78  | 13   |      |      |      |     |     |     |     |      |      |     |     |     |   |      |
| -10 | 9    | 4    | 149  | 134  | 11  | -5  | 14  | 4   | 16   | 10   | 15  | 9   | 3   |   |      |
| 5   | 29   | 20   | 28   | 1    | 7   | 5   | 134 | 139 | 2    | 7    | 11  | 5   | 128 |   |      |
| 125 | 10   |      |      |      |     |     |     |     |      |      |     |     |     |   |      |
| -9  | 9    | 4    | 183  | 173  | 10  | -4  | 14  | 4   | 121  | 131  | 10  | 10  | 3   |   |      |
| 5   | 129  | 125  | 4    | 2    | 7   | 5   | 96  | 90  | 2    | -8   | 12  | 5   | 224 |   |      |
| 213 | 10   |      |      |      |     |     |     |     |      |      |     |     |     |   |      |
| -8  | 9    | 4    | 22   | 34   | 22  | -3  | 14  | 4   | 91   | 85   | 26  | 11  | 3   |   |      |
| 5   | 132  | 132  | 8    | 3    | 7   | 5   | 346 | 351 | 2    | -7   | 12  | 5   | 66  |   |      |
| 55  | 29   |      |      |      |     |     |     |     |      |      |     |     |     |   |      |
| -7  | 9    | 4    | 392  | 390  | 5   | -2  | 14  | 4   | 105  | 100  | 15  | -13 | 4   |   |      |
| 5   | 0    | 31   | 1    | 4    | 7   | 5   | 59  | 54  | 5    | -6   | 12  | 5   | 103 |   |      |
| 105 | 13   |      |      |      |     |     |     |     |      |      |     |     |     |   |      |
| -6  | 9    | 4    | 149  | 143  | 6   | -1  | 14  | 4   | 102  | 104  | 6   | -12 | 4   |   |      |
| 5   | 206  | 210  | 7    | 5    | 7   | 5   | 154 | 158 | 3    | -5   | 12  | 5   | 122 |   |      |
| 142 | 9    |      |      |      |     |     |     |     |      |      |     |     |     |   |      |
| -5  | 9    | 4    | 480  | 477  | 4   | 0   | 14  | 4   | 0    | 28   | 1   | -11 | 4   |   |      |
| 5   | 56   | 49   | 12   | 6    | 7   | 5   | 247 | 251 | 2    | -4   | 12  | 5   | 96  |   |      |
| 85  | 15   |      |      |      |     |     |     |     |      |      |     |     |     |   |      |
| -4  | 9    | 4    | 229  | 234  | 2   | 1   | 14  | 4   | 131  | 124  | 9   | -10 | 4   |   |      |
| 5   | 128  | 128  | 4    | 7    | 7   | 5   | 61  | 67  | 7    | -3   | 12  | 5   | 55  |   |      |
| 49  | 12   |      |      |      |     |     |     |     |      |      |     |     |     |   |      |
| -3  | 9    | 4    | 45   | 44   | 12  | 2   | 14  | 4   | 0    | 14   | 1   | -9  | 4   |   |      |
| 5   | 259  | 257  | 3    | 8    | 7   | 5   | 0   | 8   | 1    | -2   | 12  | 5   | 200 |   |      |
| 211 | 3    |      |      |      |     |     |     |     |      |      |     |     |     |   |      |
| -2  | 9    | 4    | 428  | 423  | 3   | 3   | 14  | 4   | 91   | 113  | 10  | -8  | 4   |   |      |
| 5   | 464  | 462  | 4    | 9    | 7   | 5   | 0   | 10  | 1    | -1   | 12  | 5   | 87  |   |      |
| 91  | 7    |      |      |      |     |     |     |     |      |      |     |     |     |   |      |
| -1  | 9    | 4    | 412  | 420  | 4   | 4   | 14  | 4   | 160  | 143  | 11  | -7  | 4   |   |      |
| 5   | 60   | 55   | 3    | 10   | 7   | 5   | 188 | 189 | 13   | 0    | 12  | 5   | 64  |   |      |
| 50  | 27   |      |      |      |     |     |     |     |      |      |     |     |     |   |      |
| 0   | 9    | 4    | 66   | 67   | 4   | -3  | 15  | 4   | 75   | 39   | 12  | -6  | 4   |   |      |
| 5   | 52   | 49   | 3    | -11  | 8   | 5   | 295 | 305 | 12   | 1    | 12  | 5   | 263 |   |      |
| 267 | 3    |      |      |      |     |     |     |     |      |      |     |     |     |   |      |
| 1   | 9    | 4    | 336  | 333  | 2   | -2  | 15  | 4   | 52   | 24   | 19  | -5  | 4   |   |      |
| 5   | 1126 | 1123 | 9    | -10  | 8   | 5   | 56  | 31  | 22   | 2    | 12  | 5   | 60  |   |      |
| 56  | 14   |      |      |      |     |     |     |     |      |      |     |     |     |   |      |
| 2   | 9    | 4    | 119  | 111  | 2   | -1  | 15  | 4   | 270  | 277  | 6   | -4  | 4   |   |      |
| 5   | 134  | 140  | 3    | -9   | 8   | 5   | 301 | 305 | 5    | 3    | 12  | 5   | 3   |   |      |
| 50  | 2    |      |      |      |     |     |     |     |      |      |     |     |     |   |      |
| 3   | 9    | 4    | 195  | 195  | 2   | 0   | 15  | 4   | 102  | 105  | 18  | -3  | 4   |   |      |
| 5   | 133  | 142  | 1    | -8   | 8   | 5   | 158 | 165 | 6    | 4    | 12  | 5   | 115 |   |      |
| 131 | 5    |      |      |      |     |     |     |     |      |      |     |     |     |   |      |
| 4   | 9    | 4    | 151  | 148  | 2   | 1   | 15  | 4   | 0    | 30   | 1   | -2  | 4   |   |      |
| 5   | 1079 | 1082 | 11   | -7   | 8   | 5   | 275 | 279 | 3    | 5    | 12  | 5   | 65  |   |      |
| 102 | 18   |      |      |      |     |     |     |     |      |      |     |     |     |   |      |
| 5   | 9    | 4    | 15   | 28   | 14  | -13 | 1   | 5   | 223  | 248  | 10  | -1  | 4   |   |      |
| 5   | 384  | 378  | 2    | -6   | 8   | 5   | 472 | 474 | 5    | 6    | 12  | 5   | 156 |   |      |
| 167 | 10   |      |      |      |     |     |     |     |      |      |     |     |     |   |      |

|     |     |     |     |     |    |     |     |     |      |      |    |     |     |  |
|-----|-----|-----|-----|-----|----|-----|-----|-----|------|------|----|-----|-----|--|
| 6   | 9   | 4   | 403 | 406 | 5  | -12 | 1   | 5   | 353  | 346  | 6  | 0   | 4   |  |
| 5   | 897 | 884 | 4   | -5  | 8  | 5   | 154 | 161 | 2    | -7   | 13 | 5   | 0   |  |
| 37  | 1   |     |     |     |    |     |     |     |      |      |    |     |     |  |
| 7   | 9   | 4   | 108 | 102 | 10 | -11 | 1   | 5   | 375  | 378  | 4  | 1   | 4   |  |
| 5   | 673 | 683 | 4   | -4  | 8  | 5   | 212 | 221 | 4    | -6   | 13 | 5   | 204 |  |
| 201 | 7   |     |     |     |    |     |     |     |      |      |    |     |     |  |
| 8   | 9   | 4   | 67  | 59  | 13 | -10 | 1   | 5   | 359  | 354  | 2  | 2   | 4   |  |
| 5   | 573 | 555 | 3   | -3  | 8  | 5   | 528 | 533 | 3    | -5   | 13 | 5   | 223 |  |
| 221 | 7   |     |     |     |    |     |     |     |      |      |    |     |     |  |
| 9   | 9   | 4   | 83  | 77  | 25 | -9  | 1   | 5   | 794  | 779  | 5  | 3   | 4   |  |
| 5   | 702 | 695 | 4   | -2  | 8  | 5   | 307 | 310 | 2    | -4   | 13 | 5   | 68  |  |
| 37  | 19  |     |     |     |    |     |     |     |      |      |    |     |     |  |
| -10 | 10  | 4   | 40  | 67  | 39 | -8  | 1   | 5   | 63   | 54   | 3  | 4   | 4   |  |
| 5   | 831 | 829 | 4   | -1  | 8  | 5   | 392 | 394 | 4    | -3   | 13 | 5   | 224 |  |
| 211 | 4   |     |     |     |    |     |     |     |      |      |    |     |     |  |
| -9  | 10  | 4   | 179 | 179 | 11 | -7  | 1   | 5   | 77   | 82   | 3  | 5   | 4   |  |
| 5   | 376 | 383 | 2   | 0   | 8  | 5   | 171 | 178 | 1    | -2   | 13 | 5   | 149 |  |
| 146 | 4   |     |     |     |    |     |     |     |      |      |    |     |     |  |
| -8  | 10  | 4   | 94  | 89  | 13 | -6  | 1   | 5   | 1193 | 1185 | 7  | 6   | 4   |  |
| 5   | 401 | 405 | 2   | 1   | 8  | 5   | 519 | 521 | 3    | -1   | 13 | 5   | 147 |  |
| 149 | 4   |     |     |     |    |     |     |     |      |      |    |     |     |  |
| -7  | 10  | 4   | 0   | 14  | 1  | -5  | 1   | 5   | 524  | 516  | 3  | 7   | 4   |  |
| 5   | 504 | 489 | 3   | 2   | 8  | 5   | 563 | 560 | 4    | 0    | 13 | 5   | 209 |  |
| 208 | 3   |     |     |     |    |     |     |     |      |      |    |     |     |  |
| -6  | 10  | 4   | 150 | 168 | 13 | -4  | 1   | 5   | 344  | 314  | 2  | 8   | 4   |  |
| 5   | 509 | 494 | 4   | 3   | 8  | 5   | 35  | 44  | 9    | 1    | 13 | 5   | 32  |  |
| 44  | 28  |     |     |     |    |     |     |     |      |      |    |     |     |  |
| -5  | 10  | 4   | 63  | 53  | 13 | -3  | 1   | 5   | 956  | 963  | 6  | 9   | 4   |  |
| 5   | 96  | 93  | 7   | 4   | 8  | 5   | 607 | 596 | 4    | 2    | 13 | 5   | 213 |  |
| 204 | 4   |     |     |     |    |     |     |     |      |      |    |     |     |  |
| -4  | 10  | 4   | 66  | 78  | 23 | -2  | 1   | 5   | 594  | 607  | 3  | 10  | 4   |  |
| 5   | 401 | 394 | 7   | 5   | 8  | 5   | 366 | 369 | 3    | 3    | 13 | 5   | 0   |  |
| 18  | 1   |     |     |     |    |     |     |     |      |      |    |     |     |  |
| -3  | 10  | 4   | 229 | 232 | 4  | -1  | 1   | 5   | 504  | 496  | 3  | 11  | 4   |  |
| 5   | 333 | 343 | 9   | 6   | 8  | 5   | 139 | 148 | 3    | 4    | 13 | 5   | 0   |  |
| 6   | 1   |     |     |     |    |     |     |     |      |      |    |     |     |  |
| -2  | 10  | 4   | 38  | 49  | 9  | 0   | 1   | 5   | 783  | 795  | 4  | -13 | 5   |  |
| 5   | 127 | 106 | 12  | 7   | 8  | 5   | 520 | 502 | 8    | 5    | 13 | 5   | 46  |  |
| 57  | 33  |     |     |     |    |     |     |     |      |      |    |     |     |  |
| -1  | 10  | 4   | 117 | 123 | 3  | 1   | 1   | 5   | 504  | 519  | 2  | -12 | 5   |  |
| 5   | 54  | 28  | 26  | 8   | 8  | 5   | 233 | 240 | 5    | -5   | 14 | 5   | 128 |  |
| 85  | 23  |     |     |     |    |     |     |     |      |      |    |     |     |  |
| 0   | 10  | 4   | 475 | 476 | 3  | 2   | 1   | 5   | 446  | 433  | 2  | -11 | 5   |  |
| 5   | 125 | 113 | 10  | 9   | 8  | 5   | 236 | 239 | 6    | -4   | 14 | 5   | 68  |  |
| 81  | 19  |     |     |     |    |     |     |     |      |      |    |     |     |  |

|      |     |     |     |     |    |     |     |     |      |      |    |     |      |
|------|-----|-----|-----|-----|----|-----|-----|-----|------|------|----|-----|------|
| -1   | 11  | 4   | 82  | 86  | 6  | -6  | 2   | 5   | 246  | 255  | 2  | 6   | 5    |
| 5    | 224 | 231 | 2   | 5   | 9  | 5   | 50  | 43  | 8    | -7   | 0  | 6   | 945  |
| 949  | 10  |     |     |     |    |     |     |     |      |      |    |     |      |
| 0    | 11  | 4   | 81  | 85  | 5  | -5  | 2   | 5   | 580  | 578  | 3  | 7   | 5    |
| 5    | 80  | 83  | 3   | 6   | 9  | 5   | 117 | 127 | 21   | -6   | 0  | 6   | 595  |
| 608  | 5   |     |     |     |    |     |     |     |      |      |    |     |      |
| 1    | 11  | 4   | 0   | 9   | 1  | -4  | 2   | 5   | 1325 | 1272 | 7  | 8   | 5    |
| 5    | 79  | 99  | 5   | 7   | 9  | 5   | 258 | 262 | 8    | -5   | 0  | 6   | 1039 |
| 1000 | 9   |     |     |     |    |     |     |     |      |      |    |     |      |
| 2    | 11  | 4   | 83  | 81  | 5  | -3  | 2   | 5   | 336  | 324  | 2  | 9   | 5    |
| 5    | 253 | 261 | 4   | 8   | 9  | 5   | 109 | 93  | 10   | -4   | 0  | 6   | 1226 |
| 1218 | 10  |     |     |     |    |     |     |     |      |      |    |     |      |
| 3    | 11  | 4   | 50  | 53  | 7  | -2  | 2   | 5   | 353  | 377  | 2  | 10  | 5    |
| 5    | 81  | 58  | 16  | 9   | 9  | 5   | 12  | 16  | 11   | -3   | 0  | 6   | 1502 |
| 1468 | 13  |     |     |     |    |     |     |     |      |      |    |     |      |
| 4    | 11  | 4   | 114 | 87  | 16 | -1  | 2   | 5   | 773  | 760  | 4  | -11 | 6    |
| 5    | 256 | 254 | 5   | -10 | 10 | 5   | 107 | 113 | 16   | -2   | 0  | 6   | 501  |
| 502  | 4   |     |     |     |    |     |     |     |      |      |    |     |      |
| 5    | 11  | 4   | 137 | 146 | 7  | 0   | 2   | 5   | 328  | 321  | 1  | -10 | 6    |
| 5    | 79  | 91  | 14  | -9  | 10 | 5   | 172 | 180 | 8    | -1   | 0  | 6   | 1895 |
| 1912 | 16  |     |     |     |    |     |     |     |      |      |    |     |      |
| 6    | 11  | 4   | 89  | 77  | 12 | 1   | 2   | 5   | 583  | 580  | 2  | -9  | 6    |
| 5    | 320 | 309 | 12  | -8  | 10 | 5   | 92  | 97  | 16   | 0    | 0  | 6   | 565  |
| 543  | 4   |     |     |     |    |     |     |     |      |      |    |     |      |
| 7    | 11  | 4   | 176 | 176 | 6  | 2   | 2   | 5   | 304  | 313  | 2  | -8  | 6    |
| 5    | 387 | 377 | 6   | -7  | 10 | 5   | 37  | 35  | 37   | 1    | 0  | 6   | 687  |
| 685  | 5   |     |     |     |    |     |     |     |      |      |    |     |      |
| 8    | 11  | 4   | 92  | 84  | 13 | 3   | 2   | 5   | 803  | 782  | 4  | -7  | 6    |
| 5    | 107 | 106 | 7   | -6  | 10 | 5   | 27  | 7   | 26   | 2    | 0  | 6   | 1670 |
| 1668 | 11  |     |     |     |    |     |     |     |      |      |    |     |      |
| -8   | 12  | 4   | 93  | 96  | 20 | 4   | 2   | 5   | 449  | 465  | 2  | -6  | 6    |
| 5    | 682 | 689 | 8   | -5  | 10 | 5   | 98  | 106 | 8    | 3    | 0  | 6   | 89   |
| 86   | 2   |     |     |     |    |     |     |     |      |      |    |     |      |
| -7   | 12  | 4   | 49  | 35  | 29 | 5   | 2   | 5   | 221  | 243  | 2  | -5  | 6    |
| 5    | 478 | 483 | 3   | -4  | 10 | 5   | 174 | 170 | 4    | 4    | 0  | 6   | 541  |
| 532  | 4   |     |     |     |    |     |     |     |      |      |    |     |      |
| -6   | 12  | 4   | 80  | 51  | 29 | 6   | 2   | 5   | 186  | 182  | 2  | -4  | 6    |
| 5    | 333 | 336 | 2   | -3  | 10 | 5   | 64  | 54  | 4    | 5    | 0  | 6   | 774  |
| 770  | 6   |     |     |     |    |     |     |     |      |      |    |     |      |
| -5   | 12  | 4   | 206 | 203 | 6  | 7   | 2   | 5   | 666  | 660  | 4  | -3  | 6    |
| 5    | 665 | 656 | 4   | -2  | 10 | 5   | 40  | 53  | 9    | 6    | 0  | 6   | 657  |
| 647  | 5   |     |     |     |    |     |     |     |      |      |    |     |      |
| -4   | 12  | 4   | 66  | 63  | 10 | 8   | 2   | 5   | 124  | 113  | 2  | -2  | 6    |
| 5    | 777 | 784 | 6   | -1  | 10 | 5   | 29  | 23  | 29   | 7    | 0  | 6   | 312  |
| 310  | 4   |     |     |     |    |     |     |     |      |      |    |     |      |
| -3   | 12  | 4   | 302 | 309 | 3  | 9   | 2   | 5   | 98   | 94   | 5  | -1  | 6    |
| 5    | 938 | 920 | 5   | 0   | 10 | 5   | 278 | 270 | 2    | 8    | 0  | 6   | 428  |
| 419  | 5   |     |     |     |    |     |     |     |      |      |    |     |      |
| -2   | 12  | 4   | 29  | 35  | 28 | 10  | 2   | 5   | 420  | 421  | 5  | 0   | 6    |
| 5    | 154 | 171 | 2   | 1   | 10 | 5   | 76  | 75  | 12   | 9    | 0  | 6   | 648  |
| 641  | 8   |     |     |     |    |     |     |     |      |      |    |     |      |
| -1   | 12  | 4   | 142 | 152 | 4  | 11  | 2   | 5   | 164  | 171  | 13 | 1   | 6    |
| 5    | 942 | 941 | 5   | 2   | 10 | 5   | 125 | 122 | 3    | 10   | 0  | 6   | 115  |
| 123  | 10  |     |     |     |    |     |     |     |      |      |    |     |      |
| 0    | 12  | 4   | 381 | 387 | 4  | -13 | 3   | 5   | 112  | 113  | 13 | 2   | 6    |
| 5    | 531 | 533 | 3   | 3   | 10 | 5   | 368 | 369 | 3    | 11   | 0  | 6   | 285  |
| 297  | 11  |     |     |     |    |     |     |     |      |      |    |     |      |
| 1    | 12  | 4   | 106 | 108 | 7  | -12 | 3   | 5   | 358  | 353  | 8  | 3   | 6    |
| 5    | 90  | 102 | 2   | 4   | 10 | 5   | 74  | 74  | 14   | -13  | 1  | 6   | 105  |
| 106  | 16  |     |     |     |    |     |     |     |      |      |    |     |      |
| 2    | 12  | 4   | 164 | 163 | 4  | -11 | 3   | 5   | 59   | 45   | 7  | 4   | 6    |
| 5    | 871 | 864 | 5   | 5   | 10 | 5   | 152 | 149 | 6    | -12  | 1  | 6   | 63   |
| 62   | 10  |     |     |     |    |     |     |     |      |      |    |     |      |
| 3    | 12  | 4   | 212 | 225 | 12 | -10 | 3   | 5   | 268  | 272  | 3  | 5   | 6    |
| 5    | 482 | 480 | 3   | 6   | 10 | 5   | 172 | 169 | 5    | -11  | 1  | 6   | 201  |
| 206  | 4   |     |     |     |    |     |     |     |      |      |    |     |      |
| 4    | 12  | 4   | 0   | 27  | 1  | -9  | 3   | 5   | 405  | 397  | 5  | 6   | 6    |
| 5    | 112 | 119 | 6   | 7   | 10 | 5   | 78  | 83  | 12   | -10  | 1  | 6   | 54   |
| 56   | 5   |     |     |     |    |     |     |     |      |      |    |     |      |
| 5    | 12  | 4   | 126 | 130 | 9  | -8  | 3   | 5   | 358  | 358  | 3  | 7   | 6    |
| 5    | 617 | 602 | 5   | 8   | 10 | 5   | 41  | 34  | 40   | -9   | 1  | 6   | 144  |
| 146  | 2   |     |     |     |    |     |     |     |      |      |    |     |      |
| 6    | 12  | 4   | 197 | 184 | 13 | -7  | 3   | 5   | 470  | 471  | 3  | 8   | 6    |
| 5    | 445 | 439 | 4   | -9  | 11 | 5   | 184 | 182 | 12   | -8   | 1  | 6   | 510  |
| 514  | 3   |     |     |     |    |     |     |     |      |      |    |     |      |
| 7    | 12  | 4   | 84  | 95  | 15 | -6  | 3   | 5   | 516  | 511  | 3  | 9   | 6    |
| 5    | 153 | 148 | 5   | -8  | 11 | 5   | 126 | 139 | 10   | -7   | 1  | 6   | 245  |
| 251  | 5   |     |     |     |    |     |     |     |      |      |    |     |      |
| -7   | 13  | 4   | 303 | 299 | 12 | -5  | 3   | 5   | 269  | 284  | 2  | 10  | 6    |
| 5    | 381 | 371 | 13  | -7  | 11 | 5   | 148 | 144 | 7    | -6   | 1  | 6   | 222  |
| 215  | 2   |     |     |     |    |     |     |     |      |      |    |     |      |

Table 7. Observed and calculated structure factors for **3F**  
Page 5

| h    | k   | l   | 10Fo | 10Fc | 10s | h | k   | l   | 10Fo | 10Fc | 10s | h | k    | l | 10Fo | 10Fc | 10s |
|------|-----|-----|------|------|-----|---|-----|-----|------|------|-----|---|------|---|------|------|-----|
| 6    | 175 | 178 | 2    | 3    | 13  | 6 | 52  | 56  | 15   | -9   | 4   | 7 | 686  |   |      |      |     |
| 680  | 6   |     |      |      |     |   |     |     |      |      |     |   |      |   |      |      |     |
| 6    | 420 | 412 | 3    | 4    | 13  | 6 | 49  | 75  | 26   | -8   | 4   | 7 | 221  |   |      |      |     |
| 219  | 2   |     |      |      |     |   |     |     |      |      |     |   |      |   |      |      |     |
| 6    | 97  | 102 | 5    | -5   | 14  | 6 | 116 | 94  | 23   | -7   | 4   | 7 | 579  |   |      |      |     |
| 578  | 4   |     |      |      |     |   |     |     |      |      |     |   |      |   |      |      |     |
| 6    | 99  | 112 | 7    | -4   | 14  | 6 | 152 | 147 | 10   | -6   | 4   | 7 | 690  |   |      |      |     |
| 670  | 4   |     |      |      |     |   |     |     |      |      |     |   |      |   |      |      |     |
| 6    | 121 | 120 | 12   | -3   | 14  | 6 | 39  | 19  | 38   | -5   | 4   | 7 | 831  |   |      |      |     |
| 817  | 5   |     |      |      |     |   |     |     |      |      |     |   |      |   |      |      |     |
| 6    | 258 | 255 | 8    | -2   | 14  | 6 | 171 | 160 | 8    | -4   | 4   | 7 | 374  |   |      |      |     |
| 380  | 2   |     |      |      |     |   |     |     |      |      |     |   |      |   |      |      |     |
| 6    | 135 | 129 | 15   | -1   | 14  | 6 | 150 | 151 | 5    | -3   | 4   | 7 | 735  |   |      |      |     |
| 735  | 4   |     |      |      |     |   |     |     |      |      |     |   |      |   |      |      |     |
| 6    | 145 | 135 | 12   | 0    | 14  | 6 | 100 | 82  | 7    | -2   | 4   | 7 | 1051 |   |      |      |     |
| 1031 | 5   |     |      |      |     |   |     |     |      |      |     |   |      |   |      |      |     |
| 6    | 178 | 163 | 7    | 1    | 14  | 6 | 125 | 103 | 9    | -1   | 4   | 7 | 244  |   |      |      |     |
| 249  | 2   |     |      |      |     |   |     |     |      |      |     |   |      |   |      |      |     |
| 6    | 135 | 111 | 8    | 2    | 14  | 6 | 155 | 162 | 7    | 0    | 4   | 7 | 879  |   |      |      |     |
| 876  | 5   |     |      |      |     |   |     |     |      |      |     |   |      |   |      |      |     |
| 6    | 155 | 150 | 8    | 3    | 14  | 6 | 128 | 126 | 11   | 1    | 4   | 7 | 459  |   |      |      |     |
| 471  | 5   |     |      |      |     |   |     |     |      |      |     |   |      |   |      |      |     |
| 6    | 117 | 129 | 5    | -13  | 1   | 7 | 70  | 57  | 15   | 2    | 4   | 7 | 206  |   |      |      |     |
| 202  | 1   |     |      |      |     |   |     |     |      |      |     |   |      |   |      |      |     |
| 6    | 19  | 24  | 19   | -12  | 1   | 7 | 106 | 113 | 6    | 3    | 4   | 7 | 960  |   |      |      |     |
| 946  | 5   |     |      |      |     |   |     |     |      |      |     |   |      |   |      |      |     |
| 6    | 226 | 221 | 3    | -11  | 1   | 7 | 166 | 171 | 3    | 4    | 4   | 7 | 493  |   |      |      |     |
| 495  | 2   |     |      |      |     |   |     |     |      |      |     |   |      |   |      |      |     |
| 6    | 166 | 174 | 6    | -10  | 1   | 7 | 159 | 175 | 4    | 5    | 4   | 7 | 38   |   |      |      |     |
| 41   | 7   |     |      |      |     |   |     |     |      |      |     |   |      |   |      |      |     |
| 6    | 35  | 45  | 6    | -9   | 1   | 7 | 81  | 82  | 3    | 6    | 4   | 7 | 540  |   |      |      |     |
| 528  | 3   |     |      |      |     |   |     |     |      |      |     |   |      |   |      |      |     |
| 6    | 129 | 132 | 3    | -8   | 1   | 7 | 481 | 475 | 3    | 7    | 4   | 7 | 319  |   |      |      |     |
| 331  | 4   |     |      |      |     |   |     |     |      |      |     |   |      |   |      |      |     |
| 6    | 176 | 288 | 7    | -7   | 1   | 7 | 171 | 176 | 3    | 8    | 4   | 7 | 217  |   |      |      |     |
| 214  | 5   |     |      |      |     |   |     |     |      |      |     |   |      |   |      |      |     |
| 6    | 104 | 111 | 3    | -6   | 1   | 7 | 59  | 54  | 3    | 9    | 4   | 7 | 190  |   |      |      |     |
| 196  | 7   |     |      |      |     |   |     |     |      |      |     |   |      |   |      |      |     |
| 6    | 89  | 93  | 3    | -5   | 1   | 7 | 870 | 856 | 5    | 10   | 4   | 7 | 218  |   |      |      |     |
| 207  | 7   |     |      |      |     |   |     |     |      |      |     |   |      |   |      |      |     |
| 6    | 81  | 84  | 5    | -4   | 1   | 7 | 221 | 221 | 1    | -13  | 5   | 7 | 31   |   |      |      |     |
| 45   | 31  |     |      |      |     |   |     |     |      |      |     |   |      |   |      |      |     |
| 6    | 84  | 85  | 4    | -3   | 1   | 7 | 103 | 87  | 2    | -12  | 5   | 7 | 75   |   |      |      |     |
| 58   | 17  |     |      |      |     |   |     |     |      |      |     |   |      |   |      |      |     |
| 6    | 105 | 117 | 11   | -2   | 1   | 7 | 904 | 913 | 5    | -11  | 5   | 7 | 59   |   |      |      |     |
| 87   | 18  |     |      |      |     |   |     |     |      |      |     |   |      |   |      |      |     |
| 6    | 121 | 113 | 8    | -1   | 1   | 7 | 213 | 203 | 1    | -10  | 5   | 7 | 86   |   |      |      |     |
| 84   | 15  |     |      |      |     |   |     |     |      |      |     |   |      |   |      |      |     |
| 6    | 77  | 94  | 12   | 0    | 1   | 7 | 930 | 906 | 7    | -9   | 5   | 7 | 40   |   |      |      |     |
| 21   | 7   |     |      |      |     |   |     |     |      |      |     |   |      |   |      |      |     |
| 6    | 84  | 76  | 32   | 1    | 1   | 7 | 671 | 663 | 3    | -8   | 5   | 7 | 325  |   |      |      |     |
| 331  | 6   |     |      |      |     |   |     |     |      |      |     |   |      |   |      |      |     |
| 6    | 420 | 405 | 15   | 2    | 1   | 7 | 104 | 113 | 4    | -7   | 5   | 7 | 109  |   |      |      |     |
| 110  | 2   |     |      |      |     |   |     |     |      |      |     |   |      |   |      |      |     |
| 6    | 0   | 50  | 1    | 3    | 1   | 7 | 725 | 713 | 3    | -6   | 5   | 7 | 69   |   |      |      |     |
| 63   | 2   |     |      |      |     |   |     |     |      |      |     |   |      |   |      |      |     |
| 6    | 69  | 71  | 16   | 4    | 1   | 7 | 655 | 661 | 3    | -5   | 5   | 7 | 286  |   |      |      |     |
| 297  | 3   |     |      |      |     |   |     |     |      |      |     |   |      |   |      |      |     |

|     |     |     |    |     |   |   |     |     |    |     |   |   |     |  |  |  |  |
|-----|-----|-----|----|-----|---|---|-----|-----|----|-----|---|---|-----|--|--|--|--|
| 6   | 612 | 607 | 9  | 5   | 1 | 7 | 671 | 669 | 3  | -4  | 5 | 7 | 212 |  |  |  |  |
| 219 | 1   |     |    |     |   |   |     |     |    |     |   |   |     |  |  |  |  |
| 6   | 162 | 163 | 6  | 6   | 1 | 7 | 175 | 180 | 2  | -3  | 5 | 7 | 131 |  |  |  |  |
| 125 | 2   |     |    |     |   |   |     |     |    |     |   |   |     |  |  |  |  |
| 6   | 283 | 292 | 4  | 7   | 1 | 7 | 409 | 397 | 3  | -2  | 5 | 7 | 27  |  |  |  |  |
| 19  | 14  |     |    |     |   |   |     |     |    |     |   |   |     |  |  |  |  |
| 6   | 496 | 485 | 5  | 8   | 1 | 7 | 407 | 394 | 5  | -1  | 5 | 7 | 55  |  |  |  |  |
| 55  | 3   |     |    |     |   |   |     |     |    |     |   |   |     |  |  |  |  |
| 6   | 346 | 342 | 3  | 9   | 1 | 7 | 222 | 233 | 6  | 0   | 5 | 7 | 155 |  |  |  |  |
| 155 | 2   |     |    |     |   |   |     |     |    |     |   |   |     |  |  |  |  |
| 6   | 325 | 325 | 3  | 10  | 1 | 7 | 298 | 305 | 6  | 1   | 5 | 7 | 339 |  |  |  |  |
| 342 | 2   |     |    |     |   |   |     |     |    |     |   |   |     |  |  |  |  |
| 6   | 465 | 461 | 3  | -13 | 2 | 7 | 199 | 176 | 21 | 2   | 5 | 7 | 103 |  |  |  |  |
| 106 | 2   |     |    |     |   |   |     |     |    |     |   |   |     |  |  |  |  |
| 6   | 257 | 249 | 2  | -12 | 2 | 7 | 280 | 290 | 9  | 3   | 5 | 7 | 195 |  |  |  |  |
| 197 | 4   |     |    |     |   |   |     |     |    |     |   |   |     |  |  |  |  |
| 6   | 454 | 454 | 3  | -11 | 2 | 7 | 37  | 29  | 25 | 4   | 5 | 7 | 30  |  |  |  |  |
| 14  | 6   |     |    |     |   |   |     |     |    |     |   |   |     |  |  |  |  |
| 6   | 237 | 244 | 2  | -10 | 2 | 7 | 165 | 175 | 2  | 5   | 5 | 7 | 33  |  |  |  |  |
| 28  | 8   |     |    |     |   |   |     |     |    |     |   |   |     |  |  |  |  |
| 6   | 282 | 277 | 2  | -9  | 2 | 7 | 470 | 472 | 4  | 6   | 5 | 7 | 251 |  |  |  |  |
| 250 | 2   |     |    |     |   |   |     |     |    |     |   |   |     |  |  |  |  |
| 6   | 202 | 207 | 3  | -8  | 2 | 7 | 149 | 151 | 2  | 7   | 5 | 7 | 165 |  |  |  |  |
| 177 | 3   |     |    |     |   |   |     |     |    |     |   |   |     |  |  |  |  |
| 6   | 409 | 399 | 6  | -7  | 2 | 7 | 434 | 437 | 4  | 8   | 5 | 7 | 52  |  |  |  |  |
| 48  | 10  |     |    |     |   |   |     |     |    |     |   |   |     |  |  |  |  |
| 6   | 209 | 207 | 14 | -6  | 2 | 7 | 276 | 281 | 3  | 9   | 5 | 7 | 88  |  |  |  |  |
| 98  | 12  |     |    |     |   |   |     |     |    |     |   |   |     |  |  |  |  |
| 6   | 0   | 31  | 1  | -5  | 2 | 7 | 108 | 117 | 2  | 10  | 5 | 7 | 0   |  |  |  |  |
| 11  | 1   |     |    |     |   |   |     |     |    |     |   |   |     |  |  |  |  |
| 6   | 366 | 347 | 12 | -4  | 2 | 7 | 226 | 229 | 1  | -12 | 6 | 7 | 390 |  |  |  |  |
| 386 | 14  |     |    |     |   |   |     |     |    |     |   |   |     |  |  |  |  |
| 6   | 132 | 167 | 19 | -3  | 2 | 7 | 296 | 305 | 2  | -11 | 6 | 7 | 163 |  |  |  |  |
| 180 | 7   |     |    |     |   |   |     |     |    |     |   |   |     |  |  |  |  |
| 6   | 199 | 197 | 8  | -2  | 2 | 7 | 864 | 858 | 5  | -10 | 6 | 7 | 428 |  |  |  |  |
| 404 | 7   |     |    |     |   |   |     |     |    |     |   |   |     |  |  |  |  |
| 6   | 29  | 30  | 28 | -1  | 2 | 7 | 300 | 291 | 2  | -9  | 6 | 7 | 562 |  |  |  |  |
| 547 | 10  |     |    |     |   |   |     |     |    |     |   |   |     |  |  |  |  |
| 6   | 249 | 238 | 12 | 0   | 2 | 7 | 377 | 383 | 2  | -8  | 6 | 7 | 492 |  |  |  |  |
| 493 | 7   |     |    |     |   |   |     |     |    |     |   |   |     |  |  |  |  |
| 6   | 103 | 103 | 20 | 1   | 2 | 7 | 397 | 423 | 2  | -7  | 6 | 7 | 238 |  |  |  |  |
| 234 | 4   |     |    |     |   |   |     |     |    |     |   |   |     |  |  |  |  |
| 6   | 35  | 22  | 16 | 2   | 2 | 7 | 223 | 216 | 1  | -6  | 6 | 7 | 840 |  |  |  |  |
| 838 | 7   |     |    |     |   |   |     |     |    |     |   |   |     |  |  |  |  |
| 6   | 100 | 109 | 7  | 3   | 2 | 7 | 867 | 871 | 5  | -5  | 6 | 7 | 431 |  |  |  |  |
| 429 | 6   |     |    |     |   |   |     |     |    |     |   |   |     |  |  |  |  |
| 6   | 57  | 45  | 20 | 4   | 2 | 7 | 331 | 335 | 3  | -4  | 6 | 7 | 698 |  |  |  |  |
| 684 | 4   |     |    |     |   |   |     |     |    |     |   |   |     |  |  |  |  |
| 6   | 103 | 106 | 3  | 5   | 2 | 7 | 362 | 368 | 2  | -3  | 6 | 7 | 525 |  |  |  |  |
| 529 | 3   |     |    |     |   |   |     |     |    |     |   |   |     |  |  |  |  |
| 6   | 105 | 105 | 4  | 6   | 2 | 7 | 271 | 269 | 2  | -2  | 6 | 7 | 262 |  |  |  |  |
| 281 | 3   |     |    |     |   |   |     |     |    |     |   |   |     |  |  |  |  |
| 6   | 25  | 11  | 24 | 7   | 2 | 7 | 151 | 150 | 2  | -1  | 6 | 7 | 476 |  |  |  |  |
| 471 | 3   |     |    |     |   |   |     |     |    |     |   |   |     |  |  |  |  |
| 6   | 0   | 26  | 1  | 8   | 2 | 7 | 28  | 33  | 27 | 0   | 6 | 7 | 459 |  |  |  |  |
| 473 | 2   |     |    |     |   |   |     |     |    |     |   |   |     |  |  |  |  |
| 6   | 18  | 18  | 18 | 9   | 2 | 7 | 207 | 210 | 3  | 1   | 6 | 7 | 615 |  |  |  |  |
| 601 | 3   |     |    |     |   |   |     |     |    |     |   |   |     |  |  |  |  |
| 6   | 146 | 147 | 4  | 10  | 2 | 7 | 29  | 23  | 29 | 2   | 6 | 7 | 167 |  |  |  |  |
| 163 | 1   |     |    |     |   |   |     |     |    |     |   |   |     |  |  |  |  |
| 6   | 37  | 31  | 37 | -13 | 3 | 7 | 131 | 112 | 8  | 3   | 6 | 7 | 615 |  |  |  |  |
| 605 | 3   |     |    |     |   |   |     |     |    |     |   |   |     |  |  |  |  |

|     |     |     |      |      |    |     |     |     |     |     |    |    |     |
|-----|-----|-----|------|------|----|-----|-----|-----|-----|-----|----|----|-----|
| 5   | 3   | 6   | 346  | 353  | 2  | -2  | 7   | 6   | 23  | 4   | 11 | 6  | 11  |
| 6   | 61  | 53  | 16   | -12  | 3  | 7   | 0   | 31  | 1   | 4   | 6  | 7  | 375 |
| 378 | 2   |     |      |      |    |     |     |     |     |     |    |    |     |
| 6   | 3   | 6   | 437  | 444  | 3  | -1  | 7   | 6   | 248 | 251 | 2  | 7  | 11  |
| 6   | 131 | 118 | 17   | -11  | 3  | 7   | 33  | 20  | 32  | 5   | 6  | 7  | 203 |
| 205 | 4   |     |      |      |    |     |     |     |     |     |    |    |     |
| 7   | 3   | 6   | 75   | 74   | 3  | 0   | 7   | 6   | 56  | 41  | 5  | -8 | 12  |
| 6   | 146 | 144 | 17   | -10  | 3  | 7   | 19  | 3   | 18  | 6   | 6  | 7  | 455 |
| 450 | 4   |     |      |      |    |     |     |     |     |     |    |    |     |
| 8   | 3   | 6   | 121  | 124  | 9  | 1   | 7   | 6   | 194 | 185 | 3  | -7 | 12  |
| 6   | 317 | 311 | 8    | -9   | 3  | 7   | 41  | 46  | 6   | 7   | 6  | 7  | 429 |
| 428 | 4   |     |      |      |    |     |     |     |     |     |    |    |     |
| 9   | 3   | 6   | 272  | 274  | 7  | 2   | 7   | 6   | 58  | 55  | 4  | -6 | 12  |
| 6   | 83  | 56  | 13   | -8   | 3  | 7   | 324 | 337 | 2   | 8   | 6  | 7  | 0   |
| 28  | 1   |     |      |      |    |     |     |     |     |     |    |    |     |
| 10  | 3   | 6   | 62   | 78   | 12 | 3   | 7   | 6   | 212 | 228 | 1  | -5 | 12  |
| 6   | 269 | 268 | 10   | -7   | 3  | 7   | 97  | 100 | 2   | 9   | 6  | 7  | 224 |
| 214 | 7   |     |      |      |    |     |     |     |     |     |    |    |     |
| -13 | 4   | 6   | 126  | 97   | 15 | 4   | 7   | 6   | 146 | 147 | 2  | -4 | 12  |
| 6   | 372 | 371 | 7    | -6   | 3  | 7   | 268 | 264 | 2   | -12 | 7  | 7  | 86  |
| 104 | 22  |     |      |      |    |     |     |     |     |     |    |    |     |
| -12 | 4   | 6   | 80   | 73   | 17 | 5   | 7   | 6   | 180 | 182 | 3  | -3 | 12  |
| 6   | 65  | 68  | 7    | -5   | 3  | 7   | 330 | 342 | 2   | -11 | 7  | 7  | 50  |
| 37  | 42  |     |      |      |    |     |     |     |     |     |    |    |     |
| -11 | 4   | 6   | 214  | 214  | 8  | 6   | 7   | 6   | 373 | 378 | 3  | -2 | 12  |
| 6   | 350 | 345 | 4    | -4   | 3  | 7   | 67  | 62  | 3   | -10 | 7  | 7  | 0   |
| 20  | 1   |     |      |      |    |     |     |     |     |     |    |    |     |
| -10 | 4   | 6   | 380  | 379  | 5  | 7   | 7   | 6   | 120 | 115 | 9  | -1 | 12  |
| 6   | 299 | 297 | 4    | -3   | 3  | 7   | 762 | 744 | 4   | -9  | 7  | 7  | 66  |
| 11  | 42  |     |      |      |    |     |     |     |     |     |    |    |     |
| -9  | 4   | 6   | 176  | 173  | 3  | 8   | 7   | 6   | 81  | 81  | 10 | 0  | 12  |
| 6   | 149 | 141 | 5    | -2   | 3  | 7   | 227 | 226 | 2   | -8  | 7  | 7  | 305 |
| 311 | 4   |     |      |      |    |     |     |     |     |     |    |    |     |
| -8  | 4   | 6   | 178  | 184  | 2  | 9   | 7   | 6   | 193 | 198 | 17 | 1  | 12  |
| 6   | 235 | 226 | 3    | -1   | 3  | 7   | 123 | 103 | 1   | -7  | 7  | 7  | 115 |
| 125 | 4   |     |      |      |    |     |     |     |     |     |    |    |     |
| -7  | 4   | 6   | 607  | 598  | 4  | -11 | 8   | 6   | 414 | 388 | 11 | 2  | 12  |
| 6   | 289 | 290 | 4    | 0    | 3  | 7   | 287 | 286 | 1   | -6  | 7  | 7  | 37  |
| 24  | 36  |     |      |      |    |     |     |     |     |     |    |    |     |
| -6  | 4   | 6   | 192  | 194  | 3  | -10 | 8   | 6   | 317 | 324 | 7  | 3  | 12  |
| 6   | 218 | 210 | 3    | 1    | 3  | 7   | 146 | 165 | 1   | -5  | 7  | 7  | 433 |
| 436 | 3   |     |      |      |    |     |     |     |     |     |    |    |     |
| -5  | 4   | 6   | 81   | 93   | 3  | -9  | 8   | 6   | 74  | 73  | 16 | 4  | 12  |
| 6   | 219 | 222 | 5    | 2    | 3  | 7   | 183 | 193 | 3   | -4  | 7  | 7  | 89  |
| 88  | 3   |     |      |      |    |     |     |     |     |     |    |    |     |
| -4  | 4   | 6   | 314  | 331  | 2  | -8  | 8   | 6   | 96  | 89  | 16 | 5  | 12  |
| 6   | 167 | 166 | 6    | 3    | 3  | 7   | 86  | 78  | 6   | -3  | 7  | 7  | 215 |
| 218 | 2   |     |      |      |    |     |     |     |     |     |    |    |     |
| -3  | 4   | 6   | 38   | 34   | 7  | -7  | 8   | 6   | 604 | 606 | 10 | 6  | 12  |
| 6   | 293 | 287 | 8    | 4    | 3  | 7   | 448 | 447 | 2   | -2  | 7  | 7  | 392 |
| 391 | 3   |     |      |      |    |     |     |     |     |     |    |    |     |
| -2  | 4   | 6   | 545  | 546  | 3  | -6  | 8   | 6   | 246 | 260 | 3  | -7 | 13  |
| 6   | 54  | 4   | 53   | 5    | 3  | 7   | 44  | 55  | 5   | -1  | 7  | 7  | 221 |
| 223 | 2   |     |      |      |    |     |     |     |     |     |    |    |     |
| -1  | 4   | 6   | 106  | 81   | 3  | -5  | 8   | 6   | 155 | 162 | 4  | -6 | 13  |
| 6   | 74  | 85  | 19   | 6    | 3  | 7   | 100 | 109 | 3   | 0   | 7  | 7  | 216 |
| 222 | 2   |     |      |      |    |     |     |     |     |     |    |    |     |
| 0   | 4   | 6   | 1057 | 1030 | 6  | -4  | 8   | 6   | 712 | 716 | 6  | -5 | 13  |
| 6   | 26  | 46  | 25   | 7    | 3  | 7   | 324 | 326 | 4   | 1   | 7  | 7  | 133 |
| 135 | 2   |     |      |      |    |     |     |     |     |     |    |    |     |
| 1   | 4   | 6   | 379  | 374  | 2  | -3  | 8   | 6   | 178 | 179 | 2  | -4 | 13  |
| 6   | 181 | 189 | 7    | 8    | 3  | 7   | 330 | 343 | 3   | 2   | 7  | 7  | 156 |
| 156 | 2   |     |      |      |    |     |     |     |     |     |    |    |     |
| 2   | 4   | 6   | 290  | 297  | 1  | -2  | 8   | 6   | 67  | 55  | 3  | -3 | 13  |
| 6   | 269 | 275 | 5    | 9    | 3  | 7   | 0   | 29  | 1   | 3   | 7  | 7  | 34  |
| 15  | 9   |     |      |      |    |     |     |     |     |     |    |    |     |
| 3   | 4   | 6   | 154  | 158  | 1  | -1  | 8   | 6   | 624 | 614 | 7  | -2 | 13  |
| 6   | 66  | 67  | 9    | 10   | 3  | 7   | 299 | 305 | 7   | 4   | 7  | 7  | 218 |
| 229 | 2   |     |      |      |    |     |     |     |     |     |    |    |     |
| 4   | 4   | 6   | 565  | 561  | 3  | 0   | 8   | 6   | 292 | 290 | 2  | -1 | 13  |
| 6   | 59  | 35  | 13   | -13  | 4  | 7   | 285 | 300 | 11  | 5   | 7  | 7  | 77  |
| 80  | 2   |     |      |      |    |     |     |     |     |     |    |    |     |
| 5   | 4   | 6   | 246  | 251  | 2  | 1   | 8   | 6   | 223 | 231 | 2  | 0  | 13  |
| 6   | 166 | 156 | 4    | -12  | 4  | 7   | 480 | 475 | 10  | 6   | 7  | 7  | 142 |
| 146 | 3   |     |      |      |    |     |     |     |     |     |    |    |     |
| 6   | 4   | 6   | 182  | 183  | 2  | 2   | 8   | 6   | 412 | 408 | 2  | 1  | 13  |
| 6   | 80  | 79  | 11   | -11  | 4  | 7   | 21  | 44  | 21  | 7   | 7  | 7  | 130 |
| 123 | 5   |     |      |      |    |     |     |     |     |     |    |    |     |
| 7   | 4   | 6   | 84   | 92   | 3  | 3   | 8   | 6   | 121 | 118 | 2  | 2  | 13  |
| 6   | 0   | 14  | 1    | -10  | 4  | 7   | 555 | 544 | 7   | 8   | 7  | 7  | 236 |
| 234 | 6   |     |      |      |    |     |     |     |     |     |    |    |     |

Table 7. Observed and calculated structure factors for 3F

Page 6

| h   | k   | l   | 10Fo | 10Fc | 10s | h   | k   | l   | 10Fo | 10Fc | 10s | h   | k   | l | 10Fo |
|-----|-----|-----|------|------|-----|-----|-----|-----|------|------|-----|-----|-----|---|------|
| 9   | 7   | 7   | 85   | 94   | 22  | 4   | 12  | 7   | 0    | 29   | 1   | 5   | 2   |   |      |
| 8   | 258 | 267 | 2    | 0    | 6   | 8   | 19  | 28  | 19   | -9   | 11  | 8   | 80  |   |      |
| 43  | 26  |     |      |      |     |     |     |     |      |      |     |     |     |   |      |
| -11 | 8   | 7   | 211  | 210  | 11  | 5   | 12  | 7   | 86   | 75   | 19  | 6   | 2   |   |      |
| 8   | 118 | 124 | 5    | 1    | 6   | 8   | 109 | 109 | 5    | -8   | 11  | 8   | 67  |   |      |
| 53  | 66  |     |      |      |     |     |     |     |      |      |     |     |     |   |      |
| -10 | 8   | 7   | 72   | 81   | 16  | -7  | 13  | 7   | 0    | 25   | 1   | 7   | 2   |   |      |
| 8   | 0   | 28  | 1    | 2    | 6   | 8   | 39  | 43  | 15   | -7   | 11  | 8   | 187 |   |      |
| 206 | 14  |     |      |      |     |     |     |     |      |      |     |     |     |   |      |
| -9  | 8   | 7   | 276  | 266  | 6   | -6  | 13  | 7   | 77   | 55   | 28  | 8   | 2   |   |      |
| 8   | 136 | 133 | 5    | 3    | 6   | 8   | 332 | 331 | 2    | -6   | 11  | 8   | 110 |   |      |
| 108 | 16  |     |      |      |     |     |     |     |      |      |     |     |     |   |      |
| -8  | 8   | 7   | 218  | 211  | 15  | -5  | 13  | 7   | 62   | 67   | 21  | 9   | 2   |   |      |
| 8   | 64  | 83  | 13   | 4    | 6   | 8   | 57  | 58  | 9    | -5   | 11  | 8   | 116 |   |      |
| 96  | 12  |     |      |      |     |     |     |     |      |      |     |     |     |   |      |
| -7  | 8   | 7   | 302  | 304  | 7   | -4  | 13  | 7   | 75   | 86   | 18  | 10  | 2   |   |      |
| 8   | 0   | 21  | 1    | 5    | 6   | 8   | 172 | 176 | 2    | -4   | 11  | 8   | 67  |   |      |
| 71  | 6   |     |      |      |     |     |     |     |      |      |     |     |     |   |      |
| -6  | 8   | 7   | 233  | 226  | 3   | -3  | 13  | 7   | 71   | 68   | 51  | -13 | 3   |   |      |
| 8   | 224 | 223 | 7    | 6    | 6   | 8   | 175 | 178 | 3    | -3   | 11  | 8   | 13  |   |      |
| 31  | 12  |     |      |      |     |     |     |     |      |      |     |     |     |   |      |
| -5  | 8   | 7   | 410  | 416  | 4   | -2  | 13  | 7   | 133  | 137  | 6   | -12 | 3   |   |      |
| 8   | 58  | 44  | 18   | 7    | 6   | 8   | 47  | 56  | 13   | -2   | 11  | 8   | 68  |   |      |
| 75  | 5   |     |      |      |     |     |     |     |      |      |     |     |     |   |      |
| -4  | 8   | 7   | 229  | 223  | 3   | -1  | 13  | 7   | 48   | 35   | 48  | -11 | 3   |   |      |
| 8   | 177 | 184 | 4    | 8    | 6   | 8   | 193 | 188 | 7    | -1   | 11  | 8   | 85  |   |      |
| 85  | 5   |     |      |      |     |     |     |     |      |      |     |     |     |   |      |
| -3  | 8   | 7   | 548  | 543  | 5   | 0   | 13  | 7   | 96   | 102  | 7   | -10 | 3   |   |      |
| 8   | 285 | 285 | 3    | 9    | 6   | 8   | 0   | 42  | 1    | 0    | 11  | 8   | 94  |   |      |
| 95  | 4   |     |      |      |     |     |     |     |      |      |     |     |     |   |      |
| -2  | 8   | 7   | 246  | 244  | 2   | 1   | 13  | 7   | 98   | 103  | 7   | -9  | 3   |   |      |
| 8   | 298 | 304 | 6    | -12  | 7   | 8   | 63  | 84  | 40   | 1    | 11  | 8   | 152 |   |      |
| 150 | 3   |     |      |      |     |     |     |     |      |      |     |     |     |   |      |
| -1  | 8   | 7   | 315  | 312  | 2   | 2   | 13  | 7   | 107  | 106  | 6   | -8  | 3   |   |      |
| 8   | 333 | 334 | 4    | -11  | 7   | 8   | 204 | 226 | 11   | 2    | 11  | 8   | 67  |   |      |
| 72  | 8   |     |      |      |     |     |     |     |      |      |     |     |     |   |      |
| 0   | 8   | 7   | 549  | 540  | 4   | 3   | 13  | 7   | 43   | 58   | 41  | -7  | 3   |   |      |
| 8   | 197 | 200 | 2    | -10  | 7   | 8   | 263 | 267 | 6    | 3    | 11  | 8   | 67  |   |      |
| 72  | 9   |     |      |      |     |     |     |     |      |      |     |     |     |   |      |
| 1   | 8   | 7   | 260  | 267  | 2   | 4   | 13  | 7   | 125  | 128  | 12  | -6  | 3   |   |      |
| 8   | 664 | 649 | 3    | -9   | 7   | 8   | 54  | 75  | 22   | 4    | 11  | 8   | 132 |   |      |
| 122 | 9   |     |      |      |     |     |     |     |      |      |     |     |     |   |      |
| 2   | 8   | 7   | 312  | 306  | 3   | -4  | 14  | 7   | 63   | 35   | 23  | -5  | 3   |   |      |
| 8   | 176 | 175 | 2    | -8   | 7   | 8   | 288 | 293 | 4    | 5    | 11  | 8   | 57  |   |      |
| 82  | 26  |     |      |      |     |     |     |     |      |      |     |     |     |   |      |
| 3   | 8   | 7   | 121  | 131  | 2   | -3  | 14  | 7   | 202  | 201  | 13  | -4  | 3   |   |      |
| 8   | 628 | 633 | 4    | -7   | 7   | 8   | 503 | 485 | 5    | 6    | 11  | 8   | 68  |   |      |
| 62  | 45  |     |      |      |     |     |     |     |      |      |     |     |     |   |      |
| 4   | 8   | 7   | 268  | 266  | 2   | -2  | 14  | 7   | 70   | 58   | 13  | -3  | 3   |   |      |
| 8   | 528 | 523 | 3    | -6   | 7   | 8   | 46  | 34  | 6    | -8   | 12  | 8   | 214 |   |      |
| 218 | 12  |     |      |      |     |     |     |     |      |      |     |     |     |   |      |
| 5   | 8   | 7   | 90   | 88   | 5   | -1  | 14  | 7   | 0    | 15   | 1   | -2  | 3   |   |      |
| 8   | 401 | 393 | 2    | -5   | 7   | 8   | 428 | 423 | 4    | -7   | 12  | 8   | 218 |   |      |
| 223 | 12  |     |      |      |     |     |     |     |      |      |     |     |     |   |      |
| 6   | 8   | 7   | 228  | 237  | 4   | 0   | 14  | 7   | 230  | 232  | 5   | -1  | 3   |   |      |
| 8   | 729 | 746 | 4    | -4   | 7   | 8   | 406 | 406 | 3    | -6   | 12  | 8   | 71  |   |      |
| 74  | 17  |     |      |      |     |     |     |     |      |      |     |     |     |   |      |
| 7   | 8   | 7   | 88   | 79   | 8   | 1   | 14  | 7   | 43   | 28   | 42  | 0   | 3   |   |      |
| 8   | 216 | 199 | 1    | -3   | 7   | 8   | 240 | 236 | 3    | -5   | 12  | 8   | 268 |   |      |
| 249 | 12  |     |      |      |     |     |     |     |      |      |     |     |     |   |      |
| 8   | 8   | 7   | 80   | 88   | 13  | 2   | 14  | 7   | 0    | 20   | 1   | 1   | 3   |   |      |
| 8   | 516 | 496 | 3    | -2   | 7   | 8   | 422 | 428 | 3    | -4   | 12  | 8   | 41  |   |      |
| 22  | 30  |     |      |      |     |     |     |     |      |      |     |     |     |   |      |
| -11 | 9   | 7   | 149  | 147  | 19  | -13 | 0   | 8   | 198  | 191  | 9   | 2   | 3   |   |      |
| 8   | 892 | 875 | 4    | -1   | 7   | 8   | 631 | 621 | 4    | -3   | 12  | 8   | 44  |   |      |
| 35  | 18  |     |      |      |     |     |     |     |      |      |     |     |     |   |      |
| -10 | 9   | 7   | 149  | 140  | 17  | -12 | 0   | 8   | 148  | 152  | 7   | 3   | 3   |   |      |
| 8   | 338 | 344 | 2    | 0    | 7   | 8   | 490 | 481 | 4    | -2   | 12  | 8   | 320 |   |      |
| 316 | 4   |     |      |      |     |     |     |     |      |      |     |     |     |   |      |
| -9  | 9   | 7   | 125  | 128  | 9   | -11 | 0   | 8   | 624  | 616  | 10  | 4   | 3   |   |      |
| 8   | 54  | 48  | 3    | 1    | 7   | 8   | 328 | 336 | 2    | -1   | 12  | 8   | 0   |   |      |
| 17  | 1   |     |      |      |     |     |     |     |      |      |     |     |     |   |      |
| -8  | 9   | 7   | 153  | 146  | 15  | -10 | 0   | 8   | 334  | 347  | 3   | 5   | 3   |   |      |
| 8   | 735 | 728 | 5    | 2    | 7   | 8   | 446 | 444 | 3    | 0    | 12  | 8   | 104 |   |      |
| 100 | 5   |     |      |      |     |     |     |     |      |      |     |     |     |   |      |
| -7  | 9   | 7   | 0    | 15   | 1   | -9  | 0   | 8   | 260  | 262  | 3   | 6   | 3   |   |      |
| 8   | 448 | 445 | 4    | 3    | 7   | 8   | 644 | 629 | 4    | 1    | 12  | 8   | 34  |   |      |
| 19  | 33  |     |      |      |     |     |     |     |      |      |     |     |     |   |      |
| -6  | 9   | 7   | 0    | 18   | 1   | -8  | 0   | 8   | 603  | 597  | 6   | 7   | 3   |   |      |
| 8   | 168 | 161 | 5    | 4    | 7   | 8   | 165 | 168 | 2    | 2    | 12  | 8   | 18  |   |      |
| 20  | 17  |     |      |      |     |     |     |     |      |      |     |     |     |   |      |
| -5  | 9   | 7   | 259  | 267  | 3   | -7  | 0   | 8   | 252  | 243  | 3   | 8   | 3   |   |      |
| 8   | 308 | 320 | 4    | 5    | 7   | 8   | 571 | 568 | 4    | 3    | 12  | 8   | 128 |   |      |
| 111 | 10  |     |      |      |     |     |     |     |      |      |     |     |     |   |      |
| -4  | 9   | 7   | 71   | 71   | 4   | -6  | 0   | 8   | 491  | 494  | 4   | 9   | 3   |   |      |
| 8   | 340 | 337 | 6    | 6    | 7   | 8   | 289 | 286 | 7    | 4    | 12  | 8   | 60  |   |      |
| 10  | 19  |     |      |      |     |     |     |     |      |      |     |     |     |   |      |

|     |     |     |     |     |    |    |     |     |      |     |    |     |     |  |  |
|-----|-----|-----|-----|-----|----|----|-----|-----|------|-----|----|-----|-----|--|--|
| -3  | 9   | 7   | 355 | 357 | 5  | -5 | 0   | 8   | 573  | 584 | 5  | 10  | 3   |  |  |
| 8   | 214 | 206 | 8   | 7   | 7  | 8  | 154 | 159 | 4    | -6  | 13 | 8   | 76  |  |  |
| 75  | 25  |     |     |     |    |    |     |     |      |     |    |     |     |  |  |
| -2  | 9   | 7   | 305 | 311 | 4  | -4 | 0   | 8   | 92   | 109 | 4  | -13 | 4   |  |  |
| 8   | 39  | 47  | 38  | 8   | 7  | 8  | 393 | 386 | 7    | -5  | 13 | 8   | 119 |  |  |
| 117 | 17  |     |     |     |    |    |     |     |      |     |    |     |     |  |  |
| -1  | 9   | 7   | 46  | 42  | 7  | -3 | 0   | 8   | 454  | 454 | 4  | -12 | 4   |  |  |
| 8   | 241 | 241 | 6   | -11 | 8  | 8  | 273 | 266 | 11   | -4  | 13 | 8   | 125 |  |  |
| 130 | 11  |     |     |     |    |    |     |     |      |     |    |     |     |  |  |
| 0   | 9   | 7   | 211 | 226 | 2  | -2 | 0   | 8   | 594  | 620 | 5  | -11 | 4   |  |  |
| 8   | 71  | 73  | 20  | -10 | 8  | 8  | 90  | 78  | 15   | -3  | 13 | 8   | 61  |  |  |
| 71  | 22  |     |     |     |    |    |     |     |      |     |    |     |     |  |  |
| 1   | 9   | 7   | 491 | 486 | 3  | -1 | 0   | 8   | 101  | 73  | 3  | -10 | 4   |  |  |
| 8   | 44  | 37  | 19  | -9  | 8  | 8  | 0   | 32  | 1    | -2  | 13 | 8   | 50  |  |  |
| 57  | 14  |     |     |     |    |    |     |     |      |     |    |     |     |  |  |
| 2   | 9   | 7   | 33  | 22  | 10 | 0  | 0   | 8   | 482  | 453 | 4  | -9  | 4   |  |  |
| 8   | 273 | 283 | 3   | -8  | 8  | 8  | 261 | 267 | 8    | -1  | 13 | 8   | 246 |  |  |
| 248 | 5   |     |     |     |    |    |     |     |      |     |    |     |     |  |  |
| 3   | 9   | 7   | 203 | 212 | 2  | 1  | 0   | 8   | 1025 | 990 | 8  | -8  | 4   |  |  |
| 8   | 90  | 83  | 2   | -7  | 8  | 8  | 12  | 16  | 12   | 0   | 13 | 8   | 38  |  |  |
| 54  | 27  |     |     |     |    |    |     |     |      |     |    |     |     |  |  |
| 4   | 9   | 7   | 382 | 384 | 3  | 2  | 0   | 8   | 633  | 651 | 5  | -7  | 4   |  |  |
| 8   | 313 | 322 | 7   | -6  | 8  | 8  | 146 | 150 | 2    | 1   | 13 | 8   | 66  |  |  |
| 65  | 11  |     |     |     |    |    |     |     |      |     |    |     |     |  |  |
| 5   | 9   | 7   | 123 | 121 | 8  | 3  | 0   | 8   | 349  | 353 | 2  | -6  | 4   |  |  |
| 8   | 133 | 131 | 1   | -5  | 8  | 8  | 204 | 209 | 3    | 2   | 13 | 8   | 160 |  |  |
| 165 | 5   |     |     |     |    |    |     |     |      |     |    |     |     |  |  |
| 6   | 9   | 7   | 54  | 68  | 19 | 4  | 0   | 8   | 657  | 657 | 5  | -5  | 4   |  |  |
| 8   | 450 | 441 | 2   | -4  | 8  | 8  | 343 | 342 | 3    | 3   | 13 | 8   | 33  |  |  |
| 34  | 32  |     |     |     |    |    |     |     |      |     |    |     |     |  |  |
| 7   | 9   | 7   | 315 | 309 | 7  | 5  | 0   | 8   | 719  | 706 | 6  | -4  | 4   |  |  |
| 8   | 127 | 133 | 1   | -3  | 8  | 8  | 29  | 29  | 9    | -4  | 14 | 8   | 108 |  |  |
| 108 | 17  |     |     |     |    |    |     |     |      |     |    |     |     |  |  |
| 8   | 9   | 7   | 214 | 228 | 8  | 6  | 0   | 8   | 239  | 240 | 3  | -3  | 4   |  |  |
| 8   | 268 | 267 | 3   | -2  | 8  | 8  | 236 | 232 | 3    | -3  | 14 | 8   | 106 |  |  |
| 90  | 14  |     |     |     |    |    |     |     |      |     |    |     |     |  |  |
| -10 | 10  | 7   | 133 | 116 | 15 | 7  | 0   | 8   | 144  | 138 | 4  | -2  | 4   |  |  |
| 8   | 246 | 242 | 3   | -1  | 8  | 8  | 143 | 146 | 2    | -2  | 14 | 8   | 63  |  |  |
| 16  | 17  |     |     |     |    |    |     |     |      |     |    |     |     |  |  |
| -9  | 10  | 7   | 85  | 82  |    |    |     |     |      |     |    |     |     |  |  |

```

-8 11 7 194 197 11 2 1 8 63 58 3 -5 5
8 149 157 1 -2 9 8 33 29 15 2 1 9 641
634 3
-7 11 7 96 83 16 3 1 8 240 253 1 -4 5
8 663 671 4 -1 9 8 84 86 4 3 1 9 936
922 5
-6 11 7 191 194 15 4 1 8 248 245 1 -3 5
8 668 660 4 0 9 8 423 414 3 4 1 9 204
206 2
-5 11 7 124 129 6 5 1 8 90 98 2 -2 5
8 409 414 2 1 9 8 123 123 3 5 1 9 180
174 2
-4 11 7 50 66 12 6 1 8 482 479 3 -1 5
8 869 862 5 2 9 8 47 29 7 6 1 9 546
535 4
-3 11 7 9 22 8 7 1 8 0 23 1 0 5
8 583 584 3 3 9 8 211 210 4 7 1 9 495
488 4
-2 11 7 215 218 3 8 1 8 194 202 3 1 5
8 62 61 4 4 9 8 129 139 7 8 1 9 217
224 5
-1 11 7 100 109 11 9 1 8 159 160 10 2 5
8 1313 1301 7 5 9 8 304 304 4 9 1 9 274
267 5
0 11 7 73 67 18 10 1 8 14 26 13 3 5
8 220 233 2 6 9 8 118 137 7 -13 2 9 0
15 1
1 11 7 335 337 3 -13 2 8 151 162 7 4 5
8 398 397 2 7 9 8 188 179 12 -12 2 9 128
128 7
2 11 7 128 130 3 -12 2 8 102 87 9 5 5
8 516 516 4 -10 10 8 72 70 31 -11 2 9 14
22 14
3 11 7 115 116 8 -11 2 8 540 522 8 6 5
8 273 274 3 -9 10 8 0 38 1 -10 2 9 161
170 3
4 11 7 236 239 6 -10 2 8 301 309 3 7 5
8 192 194 6 -8 10 8 446 451 9 -9 2 9 25
51 19
5 11 7 89 105 10 -9 2 8 58 51 5 8 5
8 338 343 5 -7 10 8 138 126 9 -8 2 9 222
225 2
6 11 7 100 118 26 -8 2 8 853 837 6 9 5
8 308 319 9 -6 10 8 40 30 18 -7 2 9 91
101 2
-8 12 7 0 18 1 -7 2 8 248 243 2 -12 6
8 178 196 15 -5 10 8 432 417 7 -6 2 9 388
384 3
-7 12 7 59 55 39 -6 2 8 233 232 2 -11 6
8 141 149 8 -4 10 8 80 66 6 -5 2 9 304
302 2
-6 12 7 0 48 1 -5 2 8 807 798 5 -10 6
8 48 39 48 -3 10 8 11 24 11 -4 2 9 305
302 2
-5 12 7 48 14 28 -4 2 8 387 386 2 -9 6
8 124 108 9 -2 10 8 587 570 5 -3 2 9 63
55 3
-4 12 7 35 28 35 -3 2 8 407 410 2 -8 6
8 128 130 9 -1 10 8 54 57 7 -2 2 9 521
500 3
-3 12 7 143 150 7 -2 2 8 516 527 3 -7 6
8 80 81 4 0 10 8 40 32 10 -1 2 9 429
437 2
-2 12 7 0 15 1 -1 2 8 44 41 7 -6 6
8 109 114 3 1 10 8 344 344 3 0 2 9 152
147 4
-1 12 7 50 46 16 0 2 8 317 324 2 -5 6
8 380 382 3 2 10 8 75 73 5 1 2 9 73
67 3
0 12 7 280 287 4 1 2 8 426 427 2 -4 6
8 298 299 4 3 10 8 145 146 4 2 2 9 161
159 2
1 12 7 11 18 10 2 2 8 92 110 2 -3 6
8 400 392 3 4 10 8 153 147 7 3 2 9 324
333 2
2 12 7 113 108 5 3 2 8 87 92 2 -2 6
8 217 208 2 5 10 8 156 147 6 4 2 9 145
144 2
3 12 7 250 255 4 4 2 8 30 24 12 -1 6
8 278 279 6 6 10 8 27 7 27 5 2 9 18
10 17

```

Table 7. Observed and calculated structure factors for **3F**  
Page 7

| h | k   | l   | 10Fo | 10Fc | 10s | h  | k   | l   | 10Fo | 10Fc | 10s | h  | k   | l   | 10Fo | 10Fc | 10s |
|---|-----|-----|------|------|-----|----|-----|-----|------|------|-----|----|-----|-----|------|------|-----|
| 6 | 2   | 9   | 329  | 335  | 3   | 3  | 6   | 9   | 255  | 260  | 3   | -3 | 11  | 9   | 498  | 484  | 6   |
| 7 | 2   | 9   | 131  | 127  | 4   | 4  | 6   | 9   | 342  | 346  | 3   | -2 | 11  | 9   | 77   | 69   | 9   |
| 8 | 2   | 9   | 69   | 80   | 9   | 5  | 6   | 9   | 69   | 76   | 6   | -1 | 11  | 9   | 301  | 303  | 4   |
| 9 | 2   | 9   | 30   | 18   | 29  | 6  | 6   | 9   | 94   | 89   | 6   | 0  | 11  | 9   | 491  | 482  | 7   |
| 9 | 197 | 189 | 9    | 0    | 2   | 10 | 23  | 36  | 16   | 0    | 6   | 10 | 235 | 13  | 3    | 11   |     |
| 9 | 193 | 190 | 6    | 1    | 2   | 10 | 378 | 376 | 3    | 1    | 6   | 10 | 55  | 15  | 2    | 11   |     |
| 9 | 251 | 248 | 13   | 1    | 2   | 10 | 378 | 376 | 3    | 1    | 6   | 10 | 55  | 13  | 3    | 11   |     |
| 9 | 263 | 269 | 6    | -12  | 7   | 9  | 178 | 176 | 13   | 3    | 11  | 9  | 199 | 195 | 5    | 2    |     |
| 9 | 113 | 109 | 4    | -11  | 7   | 9  | 82  | 55  | 22   | 4    | 11  | 9  | 186 | 175 | 7    | 3    |     |
| 9 | 412 | 422 | 3    | -10  | 7   | 9  | 151 | 158 | 10   | 5    | 11  | 9  | 247 | 253 | 13   | 4    |     |
| 9 | 378 | 367 | 3    | -9   | 7   | 9  | 301 | 303 | 6    | -7   | 12  | 9  | 0   | 37  | 1    | 5    |     |
| 9 | 144 | 152 | 2    | -8   | 7   | 9  | 76  | 91  | 10   | -6   | 12  | 9  | 0   | 8   | 1    | 6    |     |
| 9 | 825 | 809 | 5    | -7   | 7   | 9  | 41  | 36  | 27   | -5   | 12  | 9  | 49  | 16  | 48   | 7    |     |
| 9 | 110 | 114 | 3    | -6   | 7   | 9  | 462 | 465 | 5    | -4   | 12  | 9  | 0   | 10  | 1    | 8    |     |
| 9 | 325 | 331 | 2    | -5   | 7   | 9  | 37  | 25  | 11   | -3   | 12  | 9  | 49  | 47  | 16   | 9    |     |
| 9 | 911 | 905 | 5    | -4   | 7   | 9  | 349 | 354 | 3    | -2   | 12  | 9  | 194 | 204 | 4    | -13  |     |
| 9 | 53  | 64  | 8    | -3   | 7   | 9  | 258 | 256 | 7    | -1   | 12  | 9  | 126 | 127 | 7    | -12  |     |
| 9 | 614 | 602 | 3    | -2   | 7   | 9  | 138 | 144 | 3    | 0    | 12  | 9  | 132 | 127 | 6    | -11  |     |
| 9 | 757 | 754 | 6    | -1   | 7   | 9  | 104 | 100 | 5    | 1    | 12  | 9  | 369 | 360 | 7    | -10  |     |
| 9 | 378 | 385 | 2    | 0    | 7   | 9  | 321 | 337 | 2    | 2    | 12  | 9  | 64  | 51  | 13   | -9   |     |
| 9 | 421 | 427 | 2    | 1    | 7   | 9  | 312 | 312 | 6    | 3    | 12  | 9  | 156 | 162 | 7    | -8   |     |
| 9 | 513 | 513 | 7    | 2    | 7   | 9  | 48  | 39  | 11   | 4    | 12  | 9  | 127 | 131 | 10   | -7   |     |
| 9 | 646 | 642 | 4    | 3    | 7   | 9  | 556 | 547 | 4    | -6   | 13  | 9  | 145 | 163 | 15   | -6   |     |
| 9 | 368 | 370 | 3    | 4    | 7   | 9  | 170 | 177 | 2    | -5   | 13  | 9  | 107 | 96  | 16   | -5   |     |
| 9 | 280 | 281 | 3    | 5    | 7   | 9  | 45  | 61  | 13   | -4   | 13  | 9  | 143 | 133 | 15   | -4   |     |
| 9 | 349 | 352 | 4    | 6    | 7   | 9  | 133 | 141 | 5    | -3   | 13  | 9  | 201 | 205 | 6    | -3   |     |
| 9 | 231 | 231 | 5    | 7    | 7   | 9  | 279 | 277 | 11   | -2   | 13  | 9  | 235 | 222 | 5    | -2   |     |
| 9 | 159 | 155 | 8    | 8    | 7   | 9  | 62  | 48  | 39   | -1   | 13  | 9  | 297 | 287 | 5    | -1   |     |
| 9 | 326 | 306 | 12   | -11  | 8   | 9  | 121 | 123 | 21   | 0    | 13  | 9  | 159 | 145 | 11   | 0    |     |
| 9 | 96  | 61  | 33   | -10  | 8   | 9  | 182 | 178 | 9    | 1    | 13  | 9  | 160 | 157 | 11   | 1    |     |
| 9 | 329 | 335 | 3    | 3    | 6   | 9  | 255 | 260 | 3    | -3   | 11  | 9  | 498 | 484 | 6    | -4   |     |
| 9 | 131 | 127 | 4    | 4    | 6   | 9  | 342 | 346 | 3    | -2   | 11  | 9  | 77  | 69  | 9    | -3   |     |
| 9 | 69  | 80  | 9    | 5    | 6   | 9  | 69  | 76  | 6    | -1   | 11  | 9  | 301 | 303 | 4    | -2   |     |
| 9 | 30  | 18  | 29   | 6    | 6   | 9  | 94  | 89  | 6    | 0    | 11  | 9  | 491 | 482 | 7    | -1   |     |
| 9 | 197 | 189 | 9    | 7    | 6   | 9  | 212 | 227 | 5    | 1    | 11  | 9  | 105 | 77  | 8    | 0    |     |
| 9 | 193 | 190 | 6    | 8    | 6   | 9  | 93  | 89  | 15   | 2    | 11  | 9  | 251 | 248 | 13   | 1    |     |
| 9 | 263 | 269 | 6    | -12  | 7   | 9  | 178 | 176 | 13   | 3    | 11  | 9  | 199 | 195 | 5    | 2    |     |
| 9 | 113 | 109 | 4    | -11  | 7   | 9  | 82  | 55  | 22   | 4    | 11  | 9  | 186 | 175 | 7    | 3    |     |
| 9 | 412 | 422 | 3    | -10  | 7   | 9  | 151 | 158 | 10   | 5    | 11  | 9  | 247 | 253 | 13   | 4    |     |
| 9 | 378 | 367 | 3    | -9   | 7   | 9  | 301 | 303 | 6    | -7   | 12  | 9  | 0   | 37  | 1    | 5    |     |
| 9 | 144 | 152 | 2    | -8   | 7   | 9  | 76  | 91  | 10   | -6   | 12  | 9  | 0   | 8   | 1    | 6    |     |
| 9 | 825 | 809 | 5    | -7   | 7   | 9  | 41  | 36  | 27   | -5   | 12  | 9  | 49  | 16  | 48   | 7    |     |
| 9 | 110 | 114 | 3    | -6   | 7   | 9  | 462 | 465 | 5    | -4   | 12  | 9  | 0   | 10  | 1    | 8    |     |
| 9 | 325 | 331 | 2    | -5   | 7   | 9  | 37  | 25  | 11   | -3   | 12  | 9  | 49  | 47  | 16   | 9    |     |
| 9 | 911 | 905 | 5    | -4   | 7   | 9  | 349 | 354 | 3    | -2   | 12  | 9  | 194 | 204 | 4    | -13  |     |
| 9 | 53  | 64  | 8    | -3   | 7   | 9  | 258 | 256 | 7    | -1   | 12  | 9  | 126 | 127 | 7    | -12  |     |
| 9 | 614 | 602 | 3    | -2   | 7   | 9  | 138 | 144 | 3    | 0    | 12  | 9  | 132 | 127 | 6    | -11  |     |
| 9 | 757 | 754 | 6    | -1   | 7   | 9  | 104 | 100 | 5    | 1    | 12  | 9  | 369 | 360 | 7    | -10  |     |
| 9 | 378 | 385 | 2    | 0    | 7   | 9  | 321 | 337 | 2    | 2    | 12  | 9  | 64  | 51  | 13   | -9   |     |
| 9 | 421 | 427 | 2    | 1    | 7   | 9  | 312 | 312 | 6    | 3    | 12  | 9  | 156 | 162 | 7    | -8   |     |
| 9 | 513 | 513 | 7    | 2    | 7   | 9  | 48  | 39  | 11   | 4    | 12  | 9  | 127 | 131 | 10   | -7   |     |
| 9 | 646 | 642 | 4    | 3    | 7   | 9  | 556 | 547 | 4    | -6   | 13  | 9  | 145 | 163 | 15   | -6   |     |
| 9 | 368 | 370 | 3    | 4    | 7   | 9  | 170 | 177 | 2    | -5   | 13  | 9  | 107 | 96  | 16   | -5   |     |
| 9 | 280 | 281 | 3    | 5    | 7   | 9  | 45  | 61  | 13   | -4   | 13  | 9  | 143 | 133 | 15   | -4   |     |
| 9 | 349 | 352 | 4    | 6    | 7   | 9  | 133 | 141 | 5    | -3   | 13  | 9  | 201 | 205 | 6    | -3   |     |
| 9 | 231 | 231 | 5    | 7    | 7   | 9  | 279 | 277 | 11   | -2   | 13  | 9  | 235 | 222 | 5    | -2   |     |
| 9 | 159 | 155 | 8    | 8    | 7   | 9  | 62  | 48  | 39   | -1   | 13  | 9  | 297 | 287 | 5    | -1   |     |
| 9 | 326 | 306 | 12   | -11  | 8   | 9  | 121 | 123 | 21   | 0    | 13  | 9  | 159 | 145 | 11   | 0    |     |
| 9 | 96  | 61  | 33   | -10  | 8   | 9  | 182 | 178 | 9    | 1    | 13  | 9  | 160 | 157 | 11   | 1    |     |

|     |   |   |     |     |    |     |   |   |     |     |    |     |     |    |     |     |     |
|-----|---|---|-----|-----|----|-----|---|---|-----|-----|----|-----|-----|----|-----|-----|-----|
| -11 | 4 | 9 | 70  | 76  | 29 | -9  | 8 | 9 | 63  | 86  | 63 | 2   | 13  | 9  | 249 | 231 | 9   |
| -10 | 4 | 9 | 374 | 375 | 5  | -8  | 8 | 9 | 237 | 223 | 13 | -2  | 14  | 9  | 224 | 233 | 6   |
| -9  | 4 | 9 | 35  | 42  | 12 | -7  | 8 | 9 | 60  | 14  | 16 | -1  | 14  | 9  | 183 | 187 | 8   |
| -8  | 4 | 9 | 130 | 119 | 2  | -6  | 8 | 9 | 152 | 156 | 3  | -13 | 0   | 10 | 110 | 124 | 21  |
| -7  | 4 | 9 | 439 | 442 | 3  | -5  | 8 | 9 | 39  | 37  | 12 | -12 | 0   | 10 | 176 | 186 | 6   |
| -6  | 4 | 9 | 14  | 18  | 13 | -4  | 8 | 9 | 33  | 34  | 11 | -11 | 0   | 10 | 53  | 55  | 11  |
| -5  | 4 | 9 | 300 | 302 | 2  | -3  | 8 | 9 | 189 | 188 | 4  | -10 | 0   | 10 | 486 | 492 | 6   |
| -4  | 4 | 9 | 31  | 22  | 7  | -2  | 8 | 9 | 180 | 193 | 7  | -9  | 0   | 10 | 197 | 211 | 3   |
| -3  | 4 | 9 | 42  | 34  | 5  | -1  | 8 | 9 | 115 | 123 | 3  | -8  | 0   | 10 | 239 | 241 | 3   |
| -2  | 4 | 9 | 31  | 28  | 7  | 0   | 8 | 9 | 65  | 66  | 5  | -7  | 0   | 10 | 532 | 521 | 5   |
| -1  | 4 | 9 | 82  | 78  | 2  | 1   | 8 | 9 | 397 | 400 | 3  | -6  | 0   | 10 | 463 | 468 | 5   |
| 0   | 4 | 9 | 197 | 200 | 2  | 2   | 8 | 9 | 122 | 125 | 4  | -5  | 0   | 10 | 643 | 638 | 6   |
| 1   | 4 | 9 | 262 | 258 | 4  | 3   | 8 | 9 | 51  | 48  | 6  | -4  | 0   | 10 | 782 | 776 | 7   |
| 2   | 4 | 9 | 92  | 103 | 2  | 4   | 8 | 9 | 35  | 33  | 34 | -3  | 0   | 10 | 149 | 166 | 3   |
| 3   | 4 | 9 | 172 | 178 | 2  | 5   | 8 | 9 | 91  | 96  | 7  | -2  | 0   | 10 | 441 | 447 | 4   |
| 4   | 4 | 9 | 715 | 711 | 4  | 6   | 8 | 9 | 137 | 148 | 5  | -1  | 0   | 10 | 609 | 607 | 5   |
| 5   | 4 | 9 | 16  | 14  | 15 | 7   | 8 | 9 | 69  | 51  | 47 | 0   | 0   | 10 | 83  | 74  | 4   |
| 6   | 4 | 9 | 132 | 140 | 3  | -10 | 9 | 9 | 135 | 156 | 14 | 1   | 0   | 10 | 386 | 370 | 3   |
| 7   | 4 | 9 | 388 | 388 | 4  | -9  | 9 | 9 | 461 | 445 | 9  | 2   | 0   | 10 | 559 | 562 | 4   |
| 8   | 4 | 9 | 115 | 124 | 7  | -8  | 9 | 9 | 23  | 44  | 22 | 3   | 0   | 10 | 829 | 820 | 7   |
| 9   | 4 | 9 | 0   | 37  | 1  | -7  | 9 | 9 | 318 | 326 | 10 | 4   | 0   | 10 | 70  | 69  | 5   |
| -12 | 5 | 9 | 0   | 13  | 1  | -6  | 9 | 9 | 399 | 394 | 10 | 5   | 0   | 10 | 465 | 449 | 5   |
| -11 | 5 | 9 | 46  | 14  | 28 | -5  | 9 | 9 | 111 | 119 | 4  | 6   | 0   | 10 | 641 | 636 | 8   |
| -10 | 5 | 9 | 7   | 41  | 7  | -4  | 9 | 9 | 315 | 313 | 3  | 7   | 0   | 10 | 142 | 136 | 6   |
| -9  | 5 | 9 | 85  | 66  | 4  | -3  | 9 | 9 | 468 | 461 | 8  | 8   | 0   | 10 | 433 | 427 | 8   |
| -8  | 5 | 9 | 77  | 85  | 2  | -2  | 9 | 9 | 42  | 40  | 16 | 9   | 0   | 10 | 351 | 338 | 15  |
| -7  | 5 | 9 | 215 | 212 | 3  | -1  | 9 | 9 | 164 | 176 | 4  | -13 | 1   | 10 | 137 | 131 | 7   |
| -6  | 5 | 9 | 312 | 302 | 2  | 0   | 9 | 9 | 479 | 463 | 4  | -12 | 1   | 10 | 110 | 109 | 6   |
| -5  | 5 | 9 | 199 | 212 | 6  | 1   | 9 | 9 | 251 | 256 | 5  | -11 | 1   | 10 | 154 | 172 | 6   |
| -4  | 5 | 9 | 384 | 387 | 5  | 2   | 9 | 9 | 79  | 80  | 5  | -10 | 1   | 10 | 159 | 166 | 3   |
| -3  | 5 | 9 | 148 | 142 | 2  | 3   | 9 | 9 | 250 | 244 | 3  | -9  | 1   | 10 | 221 | 236 | 2   |
| -2  | 5 | 9 | 0   | 10  | 10 | -4  | 9 | 9 | 10  | 10  | 10 | 163 | 160 | 7  | 160 | 7   | 160 |
| -1  | 5 | 9 | 0   | 10  | 10 | -4  | 9 | 9 | 10  | 10  | 10 | 163 | 160 | 7  | 160 | 7   | 160 |
| 0   | 5 | 9 | 0   | 10  | 10 | -4  | 9 | 9 | 10  | 10  | 10 | 163 | 160 | 7  | 160 | 7   | 160 |
| 1   | 5 | 9 | 0   | 10  | 10 | -4  | 9 | 9 | 10  | 10  | 10 | 163 | 160 | 7  | 160 | 7   | 160 |
| 2   | 5 | 9 | 0   | 10  | 10 | -4  | 9 | 9 | 10  | 10  | 10 | 163 | 160 | 7  | 160 | 7   | 160 |
| 3   | 5 | 9 | 0   | 10  | 10 | -4  | 9 | 9 | 10  | 10  | 10 | 163 | 160 | 7  | 160 | 7   | 160 |
| 4   | 5 | 9 | 0   | 10  | 10 | -4  | 9 | 9 | 10  | 10  | 10 | 163 | 160 | 7  | 160 | 7   | 160 |
| 5   | 5 | 9 | 0   | 10  | 10 | -4  | 9 | 9 | 10  | 10  | 10 | 163 | 160 | 7  | 160 | 7   | 160 |
| 6   | 5 | 9 | 0   | 10  | 10 | -4  | 9 | 9 | 10  | 10  | 10 | 163 | 160 | 7  | 160 | 7   | 160 |
| 7   |   |   |     |     |    |     |   |   |     |     |    |     |     |    |     |     |     |



-2 5 9 222 220 2 4 9 9 513 502 5 -8 1  
 10 59 55 8 -10 5 10 195 192 6 -1 9 10 61  
 57 7  
 -1 5 9 260 258 2 5 9 9 77 77 26 -7 1  
 10 285 291 2 -9 5 10 219 222 5 0 9 10 274  
 258 3  
 0 5 9 122 112 2 6 9 9 224 224 20 -6 1  
 10 349 352 2 -8 5 10 419 394 3 1 9 10 34  
 43 15  
 1 5 9 408 397 2 7 9 9 205 211 8 -5 1  
 10 158 165 2 -7 5 10 488 487 3 2 9 10 232  
 227 3  
 2 5 9 243 238 2 -10 10 9 17 44 17 -4 1  
 10 355 355 2 -6 5 10 201 198 2 3 9 10 272  
 272 4  
 3 5 9 72 63 3 -9 10 9 119 65 15 -3 1  
 10 159 163 2 -5 5 10 847 831 6 4 9 10 153  
 150 5  
 4 5 9 369 375 2 -8 10 9 297 297 15 -2 1  
 10 145 158 2 -4 5 10 213 213 2 5 9 10 90  
 93 15  
 5 5 9 115 132 4 -7 10 9 49 10 48 -1 1  
 10 250 250 2 -3 5 10 428 426 2 6 9 10 50  
 45 50  
 6 5 9 23 31 23 -6 10 9 17 22 16 0 1  
 10 18 19 18 -2 5 10 497 505 3 -9 10 10 150  
 157 13  
 7 5 9 40 10 18 -5 10 9 221 218 4 1 1  
 10 332 335 2 -1 5 10 582 587 4 -8 10 10 126  
 122 14  
 8 5 9 64 59 12 -4 10 9 79 91 8 2 1  
 10 266 276 2 0 5 10 197 198 2 -7 10 10 267  
 266 17  
 9 5 9 93 107 20 -3 10 9 309 298 4 3 1  
 10 274 286 2 1 5 10 740 730 4 -6 10 10 26  
 26 26  
 -12 6 9 47 22 46 -2 10 9 31 7 15 4 1  
 10 409 417 3 2 5 10 341 346 2 -5 10 10 121  
 140 4  
 -11 6 9 77 82 14 -1 10 9 63 74 14 5 1  
 10 61 73 4 3 5 10 55 58 5 -4 10 10 182  
 179 4  
 -10 6 9 180 181 11 0 10 9 43 17 12 6 1  
 10 26 46 25 4 5 10 464 453 3 -3 10 10 54  
 72 20  
 -9 6 9 180 184 7 1 10 9 25 31 24 7 1  
 10 155 146 6 5 5 10 306 308 3 -2 10 10 232  
 229 4  
 -8 6 9 36 29 35 2 10 9 119 112 10 8 1  
 10 0 12 1 6 5 10 260 264 3 -1 10 10 368  
 376 4  
 -7 6 9 115 117 8 3 10 9 73 83 8 9 1  
 10 0 38 1 7 5 10 231 226 7 0 10 10 137  
 136 4  
 -6 6 9 98 91 2 4 10 9 0 17 1 -13 2  
 10 42 50 42 8 5 10 258 259 6 1 10 10 36  
 38 17  
 -5 6 9 129 117 2 5 10 9 39 12 39 -12 2  
 10 146 148 6 -12 6 10 82 62 23 2 10 10 371  
 365 6  
 -4 6 9 234 235 3 6 10 9 140 144 12 -11 2  
 10 29 4 28 -11 6 10 159 129 23 3 10 10 228  
 229 6  
 -3 6 9 86 81 4 -9 11 9 307 303 11 -10 2  
 10 136 148 3 -10 6 10 29 26 28 4 10 10 63  
 77 24  
 -2 6 9 78 89 3 -8 11 9 191 201 15 -9 2  
 10 75 90 4 -9 6 10 240 248 4 5 10 10 310  
 295 11  
 -1 6 9 249 246 2 -7 11 9 15 31 14 -8 2  
 10 82 81 3 -8 6 10 104 106 5 -8 11 10 0  
 33 1  
 0 6 9 80 80 3 -6 11 9 454 445 12 -7 2  
 10 176 187 2 -7 6 10 44 46 3 -7 11 10 0  
 47 1  
 1 6 9 345 356 2 -5 11 9 87 101 14 -6 2  
 10 98 95 3 -6 6 10 37 41 5 -6 11 10 24  
 13 24  
 2 6 9 132 135 2 -4 11 9 146 152 17 -5 2  
 10 79 87 4 -5 6 10 66 58 4 -5 11 10 0  
 7 1

Table 7. Observed and calculated structure factors for 3F

Page 8

| h   | k   | l   | 10Fo | 10Fc | 10s | h   | k | l  | 10Fo | 10Fc | 10s | h   | k | l  | 10Fo | 10Fc | 10s |
|-----|-----|-----|------|------|-----|-----|---|----|------|------|-----|-----|---|----|------|------|-----|
| -4  | 11  | 10  | 76   | 75   | 8   | 3   | 3 | 11 | 132  | 137  | 5   | -9  | 8 |    |      |      |     |
| 11  | 161 | 162 | 8    |      |     | 3   | 0 | 12 | 260  | 255  | 4   |     | 6 | 4  | 12   | 129  |     |
| 138 | 7   |     |      |      |     |     |   |    |      |      |     |     |   |    |      |      |     |
| -3  | 11  | 10  | 119  | 109  | 6   | 4   | 3 | 11 | 112  | 119  | 4   | -8  | 8 |    |      |      |     |
| 11  | 81  | 101 | 16   |      |     | 4   | 0 | 12 | 631  | 615  | 14  |     | 7 | 4  | 12   | 86   |     |
| 80  | 10  |     |      |      |     |     |   |    |      |      |     |     |   |    |      |      |     |
| -2  | 11  | 10  | 74   | 69   | 8   | 5   | 3 | 11 | 103  | 106  | 4   | -7  | 8 |    |      |      |     |
| 11  | 173 | 176 | 12   |      |     | 5   | 0 | 12 | 335  | 329  | 6   | -12 | 5 | 12 | 90   |      |     |
| 116 | 36  |     |      |      |     |     |   |    |      |      |     |     |   |    |      |      |     |
| -1  | 11  | 10  | 39   | 41   | 17  | 6   | 3 | 11 | 39   | 33   | 23  | -6  | 8 |    |      |      |     |
| 11  | 87  | 79  | 13   |      |     | 6   | 0 | 12 | 451  | 452  | 8   | -11 | 5 | 12 | 62   |      |     |
| 78  | 19  |     |      |      |     |     |   |    |      |      |     |     |   |    |      |      |     |
| 0   | 11  | 10  | 63   | 60   | 11  | 7   | 3 | 11 | 84   | 48   | 13  | -5  | 8 |    |      |      |     |
| 11  | 65  | 76  | 8    |      |     | 7   | 0 | 12 | 211  | 209  | 7   | -10 | 5 | 12 | 71   |      |     |
| 62  | 15  |     |      |      |     |     |   |    |      |      |     |     |   |    |      |      |     |
| 1   | 11  | 10  | 93   | 113  | 7   | 8   | 3 | 11 | 105  | 107  | 14  | -4  | 8 |    |      |      |     |
| 11  | 234 | 227 | 6    |      |     | 8   | 0 | 12 | 238  | 236  | 11  | -9  | 5 | 12 | 167  |      |     |
| 164 | 5   |     |      |      |     |     |   |    |      |      |     |     |   |    |      |      |     |
| 2   | 11  | 10  | 37   | 5    | 36  | -12 | 4 | 11 | 214  | 214  | 8   | -3  | 8 |    |      |      |     |
| 11  | 224 | 227 | 3    |      |     | -13 | 1 | 12 | 0    | 24   | 1   | -8  | 5 | 12 | 321  |      |     |
| 331 | 5   |     |      |      |     |     |   |    |      |      |     |     |   |    |      |      |     |
| 3   | 11  | 10  | 164  | 172  | 7   | -11 | 4 | 11 | 164  | 169  | 7   | -7  | 7 |    |      |      |     |
| 11  | 153 | 150 | 4    |      |     | -12 | 1 | 12 | 148  | 145  | 7   | -7  | 5 | 12 | 111  |      |     |
| 108 | 2   |     |      |      |     |     |   |    |      |      |     |     |   |    |      |      |     |
| 4   | 11  | 10  | 49   | 6    | 49  | -10 | 4 | 11 | 190  | 199  | 11  | -1  | 8 |    |      |      |     |
| 11  | 384 | 376 | 3    |      |     | -11 | 1 | 12 | 0    | 6    | 1   | -6  | 5 | 12 | 431  |      |     |
| 432 | 3   |     |      |      |     |     |   |    |      |      |     |     |   |    |      |      |     |
| -7  | 12  | 10  | 56   | 80   | 55  | -9  | 4 | 11 | 345  | 352  | 4   | 0   | 8 |    |      |      |     |
| 11  | 298 | 295 | 5    |      |     | -10 | 1 | 12 | 23   | 15   | 22  | -5  | 5 | 12 | 78   |      |     |
| 69  | 4   |     |      |      |     |     |   |    |      |      |     |     |   |    |      |      |     |
| -6  | 12  | 10  | 77   | 82   | 25  | -8  | 4 | 11 | 232  | 234  | 2   | 1   | 8 |    |      |      |     |
| 11  | 78  | 85  | 5    |      |     | -9  | 1 | 12 | 34   | 33   | 13  | -4  | 5 | 12 | 138  |      |     |
| 137 | 3   |     |      |      |     |     |   |    |      |      |     |     |   |    |      |      |     |
| -5  | 12  | 10  | 30   | 50   | 29  | -7  | 4 | 11 | 256  | 269  | 2   | 2   | 8 |    |      |      |     |
| 11  | 165 | 169 | 8    |      |     | -8  | 1 | 12 | 132  | 152  | 3   | -3  | 5 | 12 | 453  |      |     |
| 456 | 3   |     |      |      |     |     |   |    |      |      |     |     |   |    |      |      |     |
| -4  | 12  | 10  | 64   | 38   | 15  | -6  | 4 | 11 | 652  | 643  | 4   | 3   | 8 |    |      |      |     |
| 11  | 346 | 346 | 4    |      |     | -7  | 1 | 12 | 324  | 326  | 5   | -2  | 5 | 12 | 54   |      |     |
| 57  | 9   |     |      |      |     |     |   |    |      |      |     |     |   |    |      |      |     |
| -3  | 12  | 10  | 94   | 82   | 22  | -5  | 4 | 11 | 488  | 480  | 4   | 4   | 8 |    |      |      |     |
| 11  | 439 | 437 | 5    |      |     | -6  | 1 | 12 | 255  | 266  | 2   | -1  | 5 | 12 | 165  |      |     |
| 169 | 3   |     |      |      |     |     |   |    |      |      |     |     |   |    |      |      |     |
| -2  | 12  | 10  | 0    | 23   | 1   | -4  | 4 | 11 | 307  | 311  | 2   | 5   | 8 |    |      |      |     |
| 11  | 37  | 32  | 36   |      |     | -5  | 1 | 12 | 292  | 297  | 2   | 0   | 5 | 12 | 0    |      |     |
| 11  | 1   |     |      |      |     |     |   |    |      |      |     |     |   |    |      |      |     |
| -1  | 12  | 10  | 189  | 184  | 6   | -3  | 4 | 11 | 930  | 915  | 5   | 6   | 8 |    |      |      |     |
| 11  | 262 | 260 | 7    |      |     | -4  | 1 | 12 | 183  | 190  | 2   | 1   | 5 | 12 | 51   |      |     |
| 39  | 13  |     |      |      |     |     |   |    |      |      |     |     |   |    |      |      |     |
| 0   | 12  | 10  | 63   | 53   | 23  | -2  | 4 | 11 | 185  | 195  | 2   | -10 | 9 |    |      |      |     |
| 11  | 242 | 238 | 13   |      |     | -3  | 1 | 12 | 117  | 116  | 2   | 2   | 5 | 12 | 211  |      |     |
| 217 | 2   |     |      |      |     |     |   |    |      |      |     |     |   |    |      |      |     |
| 1   | 12  | 10  | 66   | 73   | 14  | -1  | 4 | 11 | 252  | 252  | 2   | -9  | 9 |    |      |      |     |
| 11  | 78  | 79  | 37   |      |     | -2  | 1 | 12 | 36   | 39   | 9   | 3   | 5 | 12 | 30   |      |     |
| 43  | 26  |     |      |      |     |     |   |    |      |      |     |     |   |    |      |      |     |
| 2   | 12  | 10  | 94   | 75   | 14  | 0   | 4 | 11 | 840  | 833  | 5   | -8  | 9 |    |      |      |     |
| 11  | 27  | 19  | 27   |      |     | -1  | 1 | 12 | 233  | 246  | 2   | 4   | 5 | 12 | 38   |      |     |
| 16  | 37  |     |      |      |     |     |   |    |      |      |     |     |   |    |      |      |     |
| 3   | 12  | 10  | 77   | 95   | 15  | 1   | 4 | 11 | 523  | 524  | 3   | -7  | 9 |    |      |      |     |
| 11  | 285 | 292 | 6    |      |     | 0   | 1 | 12 | 74   | 71   | 4   | 5   | 5 | 12 | 149  |      |     |
| 156 | 4   |     |      |      |     |     |   |    |      |      |     |     |   |    |      |      |     |
| -5  | 13  | 10  | 116  | 115  | 16  | 2   | 4 | 11 | 236  | 234  | 2   | -6  | 9 |    |      |      |     |
| 11  | 67  | 48  | 41   |      |     | 1   | 1 | 12 | 48   | 36   | 8   | 6   | 5 | 12 | 110  |      |     |
| 100 | 9   |     |      |      |     |     |   |    |      |      |     |     |   |    |      |      |     |
| -4  | 13  | 10  | 66   | 51   | 29  | 3   | 4 | 11 | 481  | 473  | 5   | -5  | 9 |    |      |      |     |
| 11  | 121 | 126 | 4    |      |     | 2   | 1 | 12 | 268  | 278  | 5   | 7   | 5 | 12 | 28   |      |     |
| 42  | 27  |     |      |      |     |     |   |    |      |      |     |     |   |    |      |      |     |
| -3  | 13  | 10  | 55   | 94   | 20  | 4   | 4 | 11 | 226  | 235  | 3   | -4  | 9 |    |      |      |     |
| 11  | 340 | 336 | 6    |      |     | 3   | 1 | 12 | 77   | 79   | 5   | -11 | 6 | 12 | 154  |      |     |
| 151 | 13  |     |      |      |     |     |   |    |      |      |     |     |   |    |      |      |     |
| -2  | 13  | 10  | 152  | 156  | 6   | 5   | 4 | 11 | 231  | 232  | 5   | -3  | 9 |    |      |      |     |
| 11  | 44  | 34  | 24   |      |     | 4   | 1 | 12 | 128  | 140  | 5   | -10 | 6 | 12 | 132  |      |     |
| 122 | 13  |     |      |      |     |     |   |    |      |      |     |     |   |    |      |      |     |
| -1  | 13  | 10  | 41   | 44   | 36  | 6   | 4 | 11 | 475  | 461  | 8   | -2  | 9 |    |      |      |     |
| 11  | 59  | 52  | 10   |      |     | 5   | 1 | 12 | 218  | 218  | 5   | -9  | 6 | 12 | 103  |      |     |
| 110 | 6   |     |      |      |     |     |   |    |      |      |     |     |   |    |      |      |     |
| 0   | 13  | 10  | 66   | 57   | 12  | 7   | 4 | 11 | 256  | 255  | 5   | -1  | 9 |    |      |      |     |
| 11  | 445 | 432 | 4    |      |     | 6   | 1 | 12 | 31   | 13   | 30  | -8  | 6 | 12 | 96   |      |     |
| 91  | 5   |     |      |      |     |     |   |    |      |      |     |     |   |    |      |      |     |
| 1   | 13  | 10  | 129  | 155  | 20  | 8   | 4 | 11 | 147  | 148  | 9   | 0   | 9 |    |      |      |     |
| 11  | 175 | 172 | 3    |      |     | 7   | 1 | 12 | 35   | 50   | 35  | -7  | 6 | 12 | 156  |      |     |
| 166 | 3   |     |      |      |     |     |   |    |      |      |     |     |   |    |      |      |     |
| -13 | 1   | 11  | 352  | 349  | 8   | -11 | 5 | 11 | 180  | 164  | 11  | 1   | 9 |    |      |      |     |
| 11  | 160 | 161 | 7    |      |     | 8   | 1 | 12 | 49   | 72   | 22  | -6  | 6 | 12 | 200  |      |     |
| 208 | 5   |     |      |      |     |     |   |    |      |      |     |     |   |    |      |      |     |
| -12 | 1   | 11  | 305  | 305  | 8   | -10 | 5 | 11 | 0    | 81   | 1   | 2   | 9 |    |      |      |     |
| 11  | 348 | 341 | 3    |      |     | -13 | 2 | 12 | 158  | 150  | 8   | -5  | 6 | 12 | 194  |      |     |
| 204 | 2   |     |      |      |     |     |   |    |      |      |     |     |   |    |      |      |     |

|     |     |     |     |     |    |     |   |    |     |     |    |    |    |    |     |  |  |
|-----|-----|-----|-----|-----|----|-----|---|----|-----|-----|----|----|----|----|-----|--|--|
| -11 | 1   | 11  | 38  | 37  | 23 | -9  | 5 | 11 | 232 | 223 | 18 | 3  | 9  |    |     |  |  |
| 11  | 208 | 208 | 10  |     |    | -12 | 2 | 12 | 143 | 157 | 8  | -4 | 6  | 12 | 142 |  |  |
| 144 | 3   |     |     |     |    |     |   |    |     |     |    |    |    |    |     |  |  |
| -10 | 1   | 11  | 506 | 490 | 5  | -8  | 5 | 11 | 131 | 118 | 8  | 4  | 9  |    |     |  |  |
| 11  | 75  | 57  | 15  |     |    | -11 | 2 | 12 | 444 | 429 | 7  | -3 | 6  | 12 | 0   |  |  |
| 18  | 1   |     |     |     |    |     |   |    |     |     |    |    |    |    |     |  |  |
| -9  | 1   | 11  | 179 | 189 | 2  | -7  | 5 | 11 | 130 | 135 | 3  | 5  | 9  |    |     |  |  |
| 11  | 12  | 9   | 12  |     |    | -10 | 2 | 12 | 127 | 140 | 6  | -2 | 6  | 12 | 209 |  |  |
| 208 | 5   |     |     |     |    |     |   |    |     |     |    |    |    |    |     |  |  |
| -8  | 1   | 11  | 182 | 201 | 2  | -6  | 5 | 11 | 213 | 219 | 2  | -9 | 10 |    |     |  |  |
| 11  | 102 | 91  | 29  |     |    | -9  | 2 | 12 | 394 | 386 | 5  | -1 | 6  | 12 | 370 |  |  |
| 376 | 3   |     |     |     |    |     |   |    |     |     |    |    |    |    |     |  |  |
| -7  | 1   | 11  | 823 | 816 | 6  | -5  | 5 | 11 | 102 | 99  | 3  | -8 | 10 |    |     |  |  |
| 11  | 90  | 51  | 20  |     |    | -8  | 2 | 12 | 386 | 388 | 4  | 0  | 6  | 12 | 248 |  |  |
| 254 | 4   |     |     |     |    |     |   |    |     |     |    |    |    |    |     |  |  |
| -6  | 1   | 11  | 257 | 254 | 2  | -4  | 5 | 11 | 140 | 145 | 2  | -7 | 10 |    |     |  |  |
| 11  | 25  | 4   | 24  |     |    | -7  | 2 | 12 | 297 | 296 | 4  | 1  | 6  | 12 | 270 |  |  |
| 274 | 2   |     |     |     |    |     |   |    |     |     |    |    |    |    |     |  |  |
| -5  | 1   | 11  | 139 | 154 | 2  | -3  | 5 | 11 | 60  | 61  | 5  | -6 | 10 |    |     |  |  |
| 11  | 137 | 139 | 16  |     |    | -6  | 2 | 12 | 771 | 754 | 7  | 2  | 6  | 12 | 14  |  |  |
| 12  | 14  |     |     |     |    |     |   |    |     |     |    |    |    |    |     |  |  |
| -4  | 1   | 11  | 858 | 850 | 6  | -2  | 5 | 11 | 186 | 190 | 2  | -5 | 10 |    |     |  |  |
| 11  | 0   | 6   | 1   |     |    | -5  | 2 | 12 | 491 | 488 | 3  | 3  | 6  | 12 | 83  |  |  |
| 83  | 5   |     |     |     |    |     |   |    |     |     |    |    |    |    |     |  |  |
| -3  | 1   | 11  | 85  | 98  | 3  | -1  | 5 | 11 | 73  | 70  | 4  | -4 | 10 |    |     |  |  |
| 11  | 0   | 15  | 1   |     |    | -4  | 2 | 12 | 369 | 369 | 2  | 4  | 6  | 12 | 167 |  |  |
| 162 | 6   |     |     |     |    |     |   |    |     |     |    |    |    |    |     |  |  |
| -2  | 1   | 11  | 299 | 302 | 2  | 0   | 5 | 11 | 135 | 132 | 9  | -3 | 10 |    |     |  |  |

```

-2 2 11 246 250 2 2 6 11 57 58 6 -4 12
11 84 96 10 -1 3 12 341 340 7 -8 8 12 396
413 7
-1 2 11 108 110 3 3 6 11 912 883 8 -3 12
11 162 161 5 0 3 12 116 121 3 -7 8 12 46
49 16
0 2 11 664 653 4 4 6 11 272 278 3 -2 12
11 152 144 8 1 3 12 26 12 25 -6 8 12 82
94 6
1 2 11 258 275 2 5 6 11 195 192 7 -1 12
11 0 41 1 2 3 12 210 213 3 -5 8 12 536
530 7
2 2 11 383 382 3 6 6 11 396 388 7 0 12
11 236 243 9 3 3 12 46 64 10 -4 8 12 84
94 7
3 2 11 31 35 20 7 6 11 325 325 11 1 12
11 50 46 50 4 3 12 125 127 3 -3 8 12 183
185 5
4 2 11 140 151 6 -11 7 11 74 17 26 2 12
11 152 144 14 5 3 12 180 185 3 -2 8 12 499
500 5
5 2 11 358 354 3 -10 7 11 228 238 15 -4 13
11 126 130 16 6 3 12 117 129 7 -1 8 12 67
77 7
6 2 11 240 237 3 -9 7 11 53 43 29 -3 13
11 168 176 9 7 3 12 81 75 11 0 8 12 147
155 3
7 2 11 188 182 6 -8 7 11 61 60 12 -2 13
11 0 49 1 -12 4 12 130 101 13 1 8 12 222
219 3
8 2 11 123 130 7 -7 7 11 326 319 4 -1 13
11 9 12 9 -11 4 12 47 19 46 2 8 12 202
201 3
-13 3 11 298 295 7 -6 7 11 89 86 17 -13 0
12 84 36 30 -10 4 12 54 75 15 3 8 12 97
89 15
-12 3 11 0 29 1 -5 7 11 61 55 16 -12 0
12 321 319 8 -9 4 12 62 64 6 4 8 12 93
114 12
-11 3 11 247 249 6 -4 7 11 96 95 4 -11 0
12 557 560 10 -8 4 12 443 436 4 5 8 12 282
283 14
-10 3 11 301 304 4 -3 7 11 253 244 4 -10 0
12 187 198 4 -7 4 12 79 81 3 -9 9 12 0
30 1
-9 3 11 125 125 6 -2 7 11 8 11 7 -9 0
12 270 287 4 -6 4 12 239 249 2 -8 9 12 0
69 1
-8 3 11 146 149 4 -1 7 11 74 84 6 -8 0
12 389 382 4 -5 4 12 704 697 5 -7 9 12 108
102 16
-7 3 11 333 328 2 0 7 11 258 258 2 -7 0
12 425 409 6 -4 4 12 120 116 7 -6 9 12 35
55 35
-6 3 11 50 37 6 1 7 11 148 150 2 -6 0
12 731 726 7 -3 4 12 553 552 3 -5 9 12 202
206 6
-5 3 11 371 376 2 2 7 11 92 92 9 -5 0
12 619 606 6 -2 4 12 168 167 4 -4 9 12 0
37 1
-4 3 11 57 50 10 3 7 11 149 153 3 -4 0
12 108 111 4 -1 4 12 269 269 2 -3 9 12 56
65 12
-3 3 11 200 203 2 4 7 11 184 188 3 -3 0
12 105 105 4 0 4 12 210 212 2 -2 9 12 0
39 1
-2 3 11 11 31 10 5 7 11 189 188 4 -2 0
12 947 936 8 1 4 12 145 145 10 -1 9 12 36
17 35
-1 3 11 261 273 3 6 7 11 0 8 1 -1 0
12 590 595 6 2 4 12 323 321 3 0 9 12 159
164 4
0 3 11 318 322 2 7 7 11 87 48 23 0 0
12 391 383 4 3 4 12 216 216 2 1 9 12 38
31 18
1 3 11 128 132 3 -11 8 11 0 33 1 1 0
12 692 682 7 4 4 12 98 87 12 2 9 12 122
144 5
2 3 11 253 255 2 -10 8 11 133 79 21 2 0
12 493 504 4 5 4 12 161 162 4 3 9 12 66
63 9

```

Table 7. Observed and calculated structure factors for **3F**  
Page 9

| h   | k   | l   | 10Fo | 10Fc | 10s | h   | k  | l   | 10Fo | 10Fc | 10s | h  | k  | l   | 10Fo | 10Fc | 10s |
|-----|-----|-----|------|------|-----|-----|----|-----|------|------|-----|----|----|-----|------|------|-----|
| 4   | 9   | 12  | 106  | 112  | 23  | 5   | 3  | 13  | 179  | 179  | 4   | 4  | 8  |     |      |      |     |
| 13  | 28  | 51  | 27   |      | 2   | 2   | 14 | 69  | 71   | 9    | 2   | 7  | 14 | 239 |      |      |     |
| 235 | 20  |     |      |      |     |     |    |     |      |      |     |    |    |     |      |      |     |
| -9  | 10  | 12  | 217  | 217  | 13  | 6   | 3  | 13  | 226  | 226  | 5   | -9 | 9  |     |      |      |     |
| 13  | 142 | 94  | 14   |      | 3   | 2   | 14 | 35  | 51   | 34   | 3   | 7  | 14 | 154 |      |      |     |
| 155 | 11  |     |      |      |     |     |    |     |      |      |     |    |    |     |      |      |     |
| -8  | 10  | 12  | 436  | 450  | 17  | 7   | 3  | 13  | 149  | 147  | 9   | -8 | 9  |     |      |      |     |
| 13  | 0   | 19  | 1    |      | 4   | 2   | 14 | 200 | 201  | 5    | 4   | 7  | 14 | 227 |      |      |     |
| 237 | 8   |     |      |      |     |     |    |     |      |      |     |    |    |     |      |      |     |
| -7  | 10  | 12  | 76   | 34   | 25  | -12 | 4  | 13  | 169  | 171  | 14  | -7 | 9  |     |      |      |     |
| 13  | 0   | 39  | 1    |      | 5   | 2   | 14 | 49  | 36   | 24   | -9  | 8  | 14 | 206 |      |      |     |
| 243 | 15  |     |      |      |     |     |    |     |      |      |     |    |    |     |      |      |     |
| -6  | 10  | 12  | 86   | 112  | 10  | -11 | 4  | 13  | 196  | 201  | 9   | -6 | 9  |     |      |      |     |
| 13  | 329 | 331 | 6    |      | 6   | 2   | 14 | 7   | 16   | 7    | -8  | 8  | 14 | 54  |      |      |     |
| 63  | 54  |     |      |      |     |     |    |     |      |      |     |    |    |     |      |      |     |
| -5  | 10  | 12  | 373  | 364  | 6   | -10 | 4  | 13  | 250  | 249  | 5   | -5 | 9  |     |      |      |     |
| 13  | 0   | 17  | 1    |      | -12 | 3   | 14 | 202 | 196  | 12   | -7  | 8  | 14 | 82  |      |      |     |
| 81  | 11  |     |      |      |     |     |    |     |      |      |     |    |    |     |      |      |     |
| -4  | 10  | 12  | 254  | 263  | 9   | -9  | 4  | 13  | 270  | 277  | 8   | -4 | 9  |     |      |      |     |
| 13  | 79  | 85  | 8    |      | -11 | 3   | 14 | 132 | 140  | 9    | -6  | 8  | 14 | 363 |      |      |     |
| 361 | 6   |     |      |      |     |     |    |     |      |      |     |    |    |     |      |      |     |
| -3  | 10  | 12  | 92   | 82   | 9   | -8  | 4  | 13  | 316  | 316  | 6   | -3 | 9  |     |      |      |     |
| 13  | 224 | 234 | 5    |      | -10 | 3   | 14 | 44  | 38   | 21   | -5  | 8  | 14 | 0   |      |      |     |
| 13  | 1   |     |      |      |     |     |    |     |      |      |     |    |    |     |      |      |     |
| -2  | 10  | 12  | 310  | 299  | 5   | -7  | 4  | 13  | 499  | 495  | 4   | -2 | 9  |     |      |      |     |
| 13  | 73  | 69  | 9    |      | -9  | 3   | 14 | 148 | 149  | 4    | -4  | 8  | 14 | 54  |      |      |     |
| 56  | 13  |     |      |      |     |     |    |     |      |      |     |    |    |     |      |      |     |
| -1  | 10  | 12  | 121  | 126  | 17  | -6  | 4  | 13  | 159  | 155  | 2   | -1 | 9  |     |      |      |     |
| 13  | 115 | 129 | 6    |      | -8  | 3   | 14 | 212 | 223  | 5    | -3  | 8  | 14 | 145 |      |      |     |
| 148 | 5   |     |      |      |     |     |    |     |      |      |     |    |    |     |      |      |     |
| 0   | 10  | 12  | 162  | 167  | 5   | -5  | 4  | 13  | 90   | 95   | 3   | 0  | 9  |     |      |      |     |
| 13  | 292 | 301 | 5    |      | -7  | 3   | 14 | 436 | 437  | 4    | -2  | 8  | 14 | 263 |      |      |     |
| 264 | 5   |     |      |      |     |     |    |     |      |      |     |    |    |     |      |      |     |
| 1   | 10  | 12  | 170  | 175  | 7   | -4  | 4  | 13  | 534  | 531  | 3   | 1  | 9  |     |      |      |     |
| 13  | 41  | 26  | 21   |      | -6  | 3   | 14 | 46  | 31   | 11   | -1  | 8  | 14 | 137 |      |      |     |
| 134 | 4   |     |      |      |     |     |    |     |      |      |     |    |    |     |      |      |     |
| 2   | 10  | 12  | 308  | 295  | 7   | -3  | 4  | 13  | 419  | 421  | 3   | 2  | 9  |     |      |      |     |
| 13  | 127 | 133 | 6    |      | -5  | 3   | 14 | 200 | 207  | 3    | 0   | 8  | 14 | 45  |      |      |     |
| 37  | 17  |     |      |      |     |     |    |     |      |      |     |    |    |     |      |      |     |
| 3   | 10  | 12  | 15   | 52   | 15  | -2  | 4  | 13  | 163  | 163  | 3   | 3  | 9  |     |      |      |     |
| 13  | 200 | 198 | 7    |      | -4  | 3   | 14 | 290 | 287  | 3    | 1   | 8  | 14 | 184 |      |      |     |
| 183 | 12  |     |      |      |     |     |    |     |      |      |     |    |    |     |      |      |     |
| -7  | 11  | 12  | 186  | 204  | 12  | -1  | 4  | 13  | 762  | 750  | 6   | -8 | 10 |     |      |      |     |
| 13  | 104 | 104 | 27   |      | -3  | 3   | 14 | 120 | 119  | 4    | 2   | 8  | 14 | 102 |      |      |     |
| 104 | 10  |     |      |      |     |     |    |     |      |      |     |    |    |     |      |      |     |
| -6  | 11  | 12  | 62   | 47   | 34  | 0   | 4  | 13  | 344  | 353  | 3   | -7 | 10 |     |      |      |     |
| 13  | 71  | 16  | 28   |      | -2  | 3   | 14 | 862 | 843  | 7    | 3   | 8  | 14 | 114 |      |      |     |
| 111 | 8   |     |      |      |     |     |    |     |      |      |     |    |    |     |      |      |     |
| -5  | 11  | 12  | 54   | 53   | 19  | 1   | 4  | 13  | 109  | 113  | 4   | -6 | 10 |     |      |      |     |
| 13  | 252 | 249 | 7    |      | -1  | 3   | 14 | 204 | 204  | 3    | -8  | 9  | 14 | 86  |      |      |     |
| 70  | 24  |     |      |      |     |     |    |     |      |      |     |    |    |     |      |      |     |
| -4  | 11  | 12  | 216  | 216  | 6   | 2   | 4  | 13  | 459  | 447  | 4   | -5 | 10 |     |      |      |     |
| 13  | 48  | 19  | 24   |      | 0   | 3   | 14 | 83  | 75   | 7    | -7  | 9  | 14 | 40  |      |      |     |
| 52  | 39  |     |      |      |     |     |    |     |      |      |     |    |    |     |      |      |     |
| -3  | 11  | 12  | 73   | 65   | 9   | 3   | 4  | 13  | 225  | 234  | 7   | -4 | 10 |     |      |      |     |
| 13  | 227 | 209 | 14   |      | 1   | 3   | 14 | 460 | 458  | 5    | -6  | 9  | 14 | 51  |      |      |     |
| 48  | 27  |     |      |      |     |     |    |     |      |      |     |    |    |     |      |      |     |
| -2  | 11  | 12  | 0    | 3    | 1   | 4   | 4  | 13  | 200  | 201  | 3   | -3 | 10 |     |      |      |     |
| 13  | 52  | 46  | 15   |      | 2   | 3   | 14 | 186 | 189  | 4    | -5  | 9  | 14 | 87  |      |      |     |
| 84  | 10  |     |      |      |     |     |    |     |      |      |     |    |    |     |      |      |     |
| -1  | 11  | 12  | 106  | 104  | 10  | 5   | 4  | 13  | 325  | 312  | 5   | -2 | 10 |     |      |      |     |
| 13  | 99  | 83  | 7    |      | 3   | 3   | 14 | 322 | 316  | 4    | -4  | 9  | 14 | 178 |      |      |     |
| 167 | 9   |     |      |      |     |     |    |     |      |      |     |    |    |     |      |      |     |
| 0   | 11  | 12  | 34   | 26   | 33  | 6   | 4  | 13  | 89   | 87   | 17  | -1 | 10 |     |      |      |     |
| 13  | 0   | 13  | 1    |      | 4   | 3   | 14 | 359 | 346  | 6    | -3  | 9  | 14 | 17  |      |      |     |
| 20  | 16  |     |      |      |     |     |    |     |      |      |     |    |    |     |      |      |     |
| 1   | 11  | 12  | 68   | 71   | 19  | -11 | 5  | 13  | 0    | 19   | 1   | 0  | 10 |     |      |      |     |
| 13  | 67  | 70  | 11   |      | 5   | 3   | 14 | 209 | 209  | 15   | -2  | 9  | 14 | 141 |      |      |     |
| 143 | 9   |     |      |      |     |     |    |     |      |      |     |    |    |     |      |      |     |
| 2   | 11  | 12  | 113  | 101  | 10  | -10 | 5  | 13  | 57   | 5    | 34  | 1  | 10 |     |      |      |     |
| 13  | 283 | 271 | 8    |      | 6   | 3   | 14 | 80  | 89   | 18   | -1  | 9  | 14 | 57  |      |      |     |
| 47  | 21  |     |      |      |     |     |    |     |      |      |     |    |    |     |      |      |     |
| -5  | 12  | 12  | 212  | 204  | 11  | -9  | 5  | 13  | 0    | 15   | 1   | 2  | 10 |     |      |      |     |
| 13  | 0   | 13  | 1    |      | -11 | 4   | 14 | 47  | 49   | 47   | 0   | 9  | 14 | 147 |      |      |     |
| 153 | 7   |     |      |      |     |     |    |     |      |      |     |    |    |     |      |      |     |
| -4  | 12  | 12  | 157  | 171  | 19  | -8  | 5  | 13  | 131  | 130  | 5   | -6 | 11 |     |      |      |     |
| 13  | 0   | 15  | 1    |      | -10 | 4   | 14 | 146 | 152  | 6    | 1   | 9  | 14 | 158 |      |      |     |
| 165 | 5   |     |      |      |     |     |    |     |      |      |     |    |    |     |      |      |     |
| -3  | 12  | 12  | 253  | 251  | 7   | -7  | 5  | 13  | 60   | 81   | 7   | -5 | 11 |     |      |      |     |
| 13  | 57  | 57  | 23   |      | -9  | 4   | 14 | 157 | 142  | 6    | 2   | 9  | 14 | 227 |      |      |     |
| 225 | 6   |     |      |      |     |     |    |     |      |      |     |    |    |     |      |      |     |
| -2  | 12  | 12  | 166  | 157  | 8   | -6  | 5  | 13  | 59   | 70   | 10  | -4 | 11 |     |      |      |     |
| 13  | 233 | 231 | 8    |      | -8  | 4   | 14 | 103 | 99   | 4    | -7  | 10 | 14 | 73  |      |      |     |
| 36  | 31  |     |      |      |     |     |    |     |      |      |     |    |    |     |      |      |     |
| -1  | 12  | 12  | 151  | 146  | 17  | -5  | 5  | 13  | 237  | 237  | 4   | -3 | 11 |     |      |      |     |
| 13  | 89  | 102 | 14   |      | -7  | 4   | 14 | 86  | 88   | 5    | -6  | 10 | 14 | 248 |      |      |     |
| 258 | 8   |     |      |      |     |     |    |     |      |      |     |    |    |     |      |      |     |

|     |     |     |     |     |    |    |    |     |     |     |    |     |    |     |  |  |  |
|-----|-----|-----|-----|-----|----|----|----|-----|-----|-----|----|-----|----|-----|--|--|--|
| 0   | 12  | 12  | 133 | 135 | 8  | -4 | 5  | 13  | 0   | 21  | 1  | -2  | 11 |     |  |  |  |
| 13  | 131 | 128 | 7   |     | -6 | 4  | 14 | 371 | 375 | 3   | -5 | 10  | 14 | 185 |  |  |  |
| 180 | 8   |     |     |     |    |    |    |     |     |     |    |     |    |     |  |  |  |
| -12 | 1   | 13  | 38  | 72  | 38 | -3 | 5  | 13  | 140 | 141 | 5  | -1  | 11 |     |  |  |  |
| 13  | 79  | 86  | 13  |     | -5 | 4  | 14 | 145 | 143 | 11  | -4 | 10  | 14 | 110 |  |  |  |
| 106 | 8   |     |     |     |    |    |    |     |     |     |    |     |    |     |  |  |  |
| -11 | 1   | 13  | 34  | 45  | 34 | -2 | 5  | 13  | 172 | 176 | 3  | 0   | 11 |     |  |  |  |
| 13  | 35  | 46  | 35  |     | -4 | 4  | 14 | 67  | 68  | 7   | -3 | 10  | 14 | 224 |  |  |  |
| 217 | 14  |     |     |     |    |    |    |     |     |     |    |     |    |     |  |  |  |
| -10 | 1   | 13  | 0   | 8   | 1  | -1 | 5  | 13  | 37  | 38  | 14 | 1   | 11 |     |  |  |  |
| 13  | 199 | 198 | 12  |     | -3 | 4  | 14 | 12  | 35  | 11  | -2 | 10  | 14 | 103 |  |  |  |
| 113 | 8   |     |     |     |    |    |    |     |     |     |    |     |    |     |  |  |  |
| -9  | 1   | 13  | 121 | 126 | 4  | 0  | 5  | 13  | 60  | 61  | 8  | -3  | 12 |     |  |  |  |
| 13  | 58  | 27  | 34  |     | -2 | 4  | 14 | 106 | 103 | 4   | -1 | 10  | 14 | 81  |  |  |  |
| 66  | 11  |     |     |     |    |    |    |     |     |     |    |     |    |     |  |  |  |
| -8  | 1   | 13  | 62  | 65  | 8  | 1  | 5  | 13  | 149 | 160 | 10 | -2  | 12 |     |  |  |  |
| 13  | 0   | 36  | 1   |     | -1 | 4  | 14 | 161 | 170 | 3   | 0  | 10  | 14 | 150 |  |  |  |
| 152 | 6   |     |     |     |    |    |    |     |     |     |    |     |    |     |  |  |  |
| -7  | 1   | 13  | 151 | 154 | 3  | 2  | 5  | 13  | 168 | 174 | 3  | -12 | 0  |     |  |  |  |
| 14  | 370 | 361 | 13  |     | 0  | 4  | 14 | 22  | 38  | 21  | 1  | 10  | 14 | 93  |  |  |  |
| 82  | 9   |     |     |     |    |    |    |     |     |     |    |     |    |     |  |  |  |
| -6  | 1   | 13  | 566 | 559 | 4  | 3  | 5  | 13  | 187 | 196 | 6  | -11 | 0  |     |  |  |  |
| 14  | 40  | 56  | 39  |     | 1  | 4  | 14 | 71  | 47  | 8   | -5 | 11  | 14 | 131 |  |  |  |
| 137 | 10  |     |     |     |    |    |    |     |     |     |    |     |    |     |  |  |  |
| -5  | 1   | 13  | 201 | 216 | 2  | 4  | 5  | 13  | 60  | 60  | 19 | -10 | 0  |     |  |  |  |
| 14  | 203 | 193 | 5   |     | 2  | 4  | 14 | 11  | 14  | 10  | -4 | 11  | 14 | 69  |  |  |  |
| 92  | 18  |     |     |     |    |    |    |     |     |     |    |     |    |     |  |  |  |
| -4  | 1   | 13  | 231 | 235 | 6  | 5  | 5  | 13  | 99  | 95  | 12 | -9  | 0  |     |  |  |  |

-2 2 13 217 234 2 -7 7 13 164 174 5 -6 1  
 14 39 40 14 -9 6 14 234 242 11 -10 2 15 94  
 94 7  
 -1 2 13 179 185 3 -6 7 13 248 256 5 -5 1  
 14 139 138 3 -8 6 14 39 15 38 -9 2 15 102  
 102 5  
 0 2 13 505 509 3 -5 7 13 48 40 13 -4 1  
 14 161 169 3 -7 6 14 212 214 3 -8 2 15 92  
 99 7  
 1 2 13 34 32 17 -4 7 13 82 76 5 -3 1  
 14 7 15 7 -6 6 14 170 169 4 -7 2 15 98  
 93 8  
 2 2 13 32 27 17 -3 7 13 174 176 7 -2 1  
 14 384 390 3 -5 6 14 350 345 3 -6 2 15 283  
 288 3  
 3 2 13 393 386 4 -2 7 13 105 115 4 -1 1  
 14 45 42 44 -4 6 14 43 44 24 -5 2 15 125  
 131 4  
 4 2 13 31 35 31 -1 7 13 24 19 24 0 1  
 14 49 23 36 -3 6 14 107 114 5 -4 2 15 37  
 20 15  
 5 2 13 348 338 5 0 7 13 302 307 3 1 1  
 14 100 109 6 -2 6 14 154 164 5 -3 2 15 164  
 159 5  
 6 2 13 148 152 5 1 7 13 0 19 1 2 1  
 14 158 166 4 -1 6 14 0 6 1 -2 2 15 108  
 109 5  
 7 2 13 76 95 12 2 7 13 63 58 7 3 1  
 14 89 89 7 0 6 14 208 207 3 -1 2 15 186  
 181 6  
 -12 3 13 134 137 9 3 7 13 114 113 6 4 1  
 14 122 116 9 1 6 14 65 76 24 0 2 15 99  
 98 7  
 -11 3 13 103 98 14 4 7 13 30 10 30 5 1  
 14 77 73 11 2 6 14 13 29 13 1 2 15 74  
 82 11  
 -10 3 13 62 72 20 5 7 13 158 169 8 6 1  
 14 79 74 28 3 6 14 0 26 1 2 2 15 80  
 56 16  
 -9 3 13 93 101 4 -10 8 13 295 262 11 -12 2  
 14 218 223 10 4 6 14 121 122 15 3 2 15 32  
 39 32  
 -8 3 13 141 156 5 -9 8 13 225 229 10 -11 2  
 14 235 236 8 5 6 14 63 81 62 4 2 15 32  
 37 31  
 -7 3 13 212 219 3 -8 8 13 149 138 10 -10 2  
 14 44 56 12 -10 7 14 93 78 29 5 2 15 35  
 18 34  
 -6 3 13 8 11 7 -7 8 13 293 283 6 -9 2  
 14 539 522 6 -9 7 14 0 37 1 -11 3 15 50  
 69 36  
 -5 3 13 0 17 1 -6 8 13 355 347 4 -8 2  
 14 79 85 5 -8 7 14 428 417 9 -10 3 15 149  
 154 6  
 -4 3 13 61 55 6 -5 8 13 300 298 8 -7 2  
 14 71 59 9 -7 7 14 215 221 6 -9 3 15 253  
 247 4  
 -3 3 13 122 130 3 -4 8 13 297 293 4 -6 2  
 14 603 597 5 -6 7 14 262 259 4 -8 3 15 53  
 59 10  
 -2 3 13 125 126 5 -3 8 13 287 277 7 -5 2  
 14 187 199 3 -5 7 14 457 440 5 -7 3 15 389  
 381 4  
 -1 3 13 121 120 3 -2 8 13 189 183 4 -4 2  
 14 239 241 2 -4 7 14 136 137 10 -6 3 15 127  
 117 4  
 0 3 13 82 86 5 -1 8 13 283 277 7 -3 2  
 14 335 342 3 -3 7 14 228 222 3 -5 3 15 225  
 221 3  
 1 3 13 261 258 3 0 8 13 102 88 5 -2 2  
 14 164 160 3 -2 7 14 192 199 4 -4 3 15 559  
 545 9  
 2 3 13 29 31 28 1 8 13 255 246 3 -1 2  
 14 52 23 17 -1 7 14 195 191 3 -3 3 15 225  
 219 4  
 3 3 13 353 351 4 2 8 13 246 253 4 0 2  
 14 140 139 8 0 7 14 330 334 4 -2 3 15 248  
 247 3  
 4 3 13 149 146 4 3 8 13 98 89 7 1 2  
 14 187 196 4 1 7 14 209 208 4 -1 3 15 465  
 459 4

Table 7. Observed and calculated structure factors for 3f  
Page 10

| h  | k   | l   | 10Fo | 10Fc | 10s | h  | k   | l   | 10Fo | 10Fc | 10s | h  | k   | l   | 10Fo | 10Fc | 10s |    |     |     |    |     |    |    |     |     |    |    |   |
|----|-----|-----|------|------|-----|----|-----|-----|------|------|-----|----|-----|-----|------|------|-----|----|-----|-----|----|-----|----|----|-----|-----|----|----|---|
| 0  | 3   | 15  | 232  | 234  | 4   | -6 | 10  | 15  | 237  | 247  | 10  | -8 | 5   | 16  | 124  | 121  | 6   |    |     |     |    |     |    |    |     |     |    |    |   |
| 16 | 124 | 121 | 6    | -4   | 3   | 17 | 182 | 178 | 14   | -3   | 2   | 18 | 143 | 126 | 15   | 1    | 3   | 15 | 289 | 293 | 4  | -5  | 10 | 15 | 193 | 204 | 8  | -7 | 5 |
| 16 | 82  | 80  | 8    | -3   | 3   | 17 | 39  | 48  | 38   | -2   | 2   | 18 | 422 | 414 | 6    | 2    | 3   | 15 | 337 | 339 | 4  | -4  | 10 | 15 | 43  | 35  | 43 | -6 | 5 |
| 16 | 471 | 459 | 6    | -2   | 3   | 17 | 234 | 229 | 8    | -1   | 2   | 18 | 62  | 56  | 20   | 3    | 3   | 15 | 194 | 185 | 5  | -3  | 10 | 15 | 84  | 91  | 28 | -5 | 5 |
| 16 | 229 | 216 | 5    | -1   | 3   | 17 | 123 | 127 | 7    | 0    | 2   | 18 | 356 | 357 | 8    | 4    | 3   | 15 | 109 | 108 | 11 | -2  | 10 | 15 | 0   | 9   | 1  | -4 | 5 |
| 16 | 106 | 115 | 17   | 0    | 3   | 17 | 84  | 106 | 9    | 1    | 2   | 18 | 179 | 171 | 12   | 5    | 3   | 15 | 128 | 120 | 7  | -1  | 10 | 15 | 55  | 40  | 54 | -3 | 5 |
| 16 | 372 | 361 | 4    | 1    | 3   | 17 | 210 | 195 | 5    | 2    | 2   | 18 | 127 | 109 | 11   | -10  | 4   | 15 | 85  | 67  | 11 | -11 | 0  | 16 | 82  | 81  | 19 | -2 | 5 |
| 16 | 349 | 345 | 4    | 2    | 3   | 17 | 66  | 51  | 16   | -9   | 3   | 18 | 164 | 163 | 20   | -9   | 4   | 15 | 40  | 57  | 40 | -10 | 0  | 16 | 99  | 110 | 10 | -1 | 5 |
| 16 | 31  | 35  | 30   | 3    | 3   | 17 | 92  | 83  | 23   | -8   | 3   | 18 | 189 | 186 | 5    | -8   | 4   | 15 | 230 | 233 | 4  | -9  | 0  | 16 | 133 | 134 | 8  | 0  | 5 |
| 16 | 297 | 288 | 4    | -10  | 4   | 17 | 391 | 376 | 16   | -7   | 3   | 18 | 101 | 106 | 9    | -7   | 4   | 15 | 229 | 236 | 3  | -6  | 0  | 16 | 88  | 68  | 10 | 3  | 5 |
| 16 | 297 | 302 | 4    | -9   | 4   | 17 | 0   | 59  | 1    | -6   | 3   | 18 | 91  | 104 | 7    | -6   | 4   | 15 | 136 | 129 | 4  | -7  | 0  | 16 | 37  | 57  | 36 | 2  | 5 |
| 16 | 71  | 60  | 12   | -8   | 4   | 17 | 157 | 154 | 5    | -5   | 3   | 18 | 135 | 138 | 6    | -5   | 4   | 15 | 229 | 236 | 3  | -6  | 0  | 16 | 88  | 68  | 10 | 3  | 5 |
| 16 | 325 | 332 | 7    | -7   | 4   | 17 | 421 | 413 | 6    | -4   | 3   | 18 | 236 | 233 | 4    | -4   | 4   | 15 | 126 | 125 | 4  | -5  | 0  | 16 | 281 | 277 | 5  | -9 | 6 |
| 16 | 53  | 41  | 52   | -6   | 4   | 17 | 164 | 161 | 5    | -3   | 3   | 18 | 96  | 105 | 8    | -3   | 4   | 15 | 185 | 190 | 3  | -4  | 0  | 16 | 91  | 69  | 10 | -8 | 6 |
| 16 | 137 | 123 | 27   | -5   | 4   | 17 | 52  | 51  | 13   | -2   | 3   | 18 | 146 | 136 | 7    | -2   | 4   | 15 | 70  | 61  | 11 | -3  | 0  | 16 | 201 | 199 | 7  | -7 | 6 |
| 16 | 87  | 82  | 10   | -4   | 4   | 17 | 350 | 347 | 4    | -1   | 3   | 18 | 166 | 144 | 6    | -1   | 4   | 15 | 38  | 48  | 19 | -2  | 0  | 16 | 425 | 416 | 6  | -6 | 6 |
| 16 | 145 | 148 | 5    | -3   | 4   | 17 | 250 | 246 | 8    | 0    | 3   | 18 | 115 | 123 | 10   | -1   | 4   | 15 | 114 | 121 | 5  | -1  | 0  | 16 | 30  | 28  | 30 | -5 | 6 |
| 16 | 165 | 159 | 5    | -2   | 4   | 17 | 107 | 103 | 13   | 1    | 3   | 18 | 155 | 140 | 9    | 1    | 4   | 15 | 99  | 0   | 22 | 1   | 0  | 16 | 283 | 289 | 5  | -4 | 6 |
| 16 | 93  | 99  | 9    | -1   | 4   | 17 | 343 | 329 | 4    | -9   | 4   | 18 | 83  | 26  | 22   | 2    | 4   | 15 | 38  | 52  | 16 | 1   | 0  | 16 | 455 | 446 | 8  | -3 | 6 |
| 16 | 63  | 73  | 10   | 0    | 4   | 17 | 207 | 203 | 4    | -8   | 4   | 18 | 97  | 96  | 16   | 3    | 4   | 15 | 177 | 186 | 5  | 2   | 0  | 16 | 198 | 203 | 6  | -2 | 6 |
| 16 | 97  | 109 | 6    | 1    | 4   | 17 | 138 | 134 | 7    | -7   | 4   | 18 | 120 | 116 | 17   | 4    | 4   | 15 | 66  | 42  | 37 | 3   | 0  | 16 | 55  | 44  | 27 | -1 | 6 |
| 16 | 127 | 129 | 6    | 2    | 4   | 17 | 295 | 296 | 6    | -6   | 4   | 18 | 288 | 270 | 11   | 5    | 4   | 15 | 74  | 53  | 73 | 4   | 0  | 16 | 422 | 411 | 16 | 0  | 6 |
| 16 | 49  | 25  | 14   | -9   | 5   | 17 | 106 | 135 | 15   | -5   | 4   | 18 | 0   | 23  | 1    | -11  | 5   | 15 | 137 | 130 | 16 | -11 | 1  | 16 | 21  | 38  | 21 | 1  | 6 |
| 16 | 38  | 78  | 38   | -8   | 5   | 17 | 102 | 98  | 10   | -4   | 4   | 18 | 103 | 89  | 7    | -10  | 5   | 15 | 69  | 77  | 34 | -10 | 1  | 16 | 103 | 102 | 8  | 2  | 6 |
| 16 | 78  | 74  | 17   | -7   | 5   | 17 | 0   | 13  | 1    | -3   | 4   | 18 | 124 | 127 | 6    | -9   | 5   | 15 | 82  | 85  | 10 | -9  | 1  | 16 | 153 | 159 | 5  | 3  | 6 |
| 16 | 0   | 48  | 1    | -6   | 5   | 17 | 191 | 185 | 5    | -2   | 4   | 18 | 60  | 47  | 18   | -8   | 5   | 15 | 38  | 43  | 19 | -8  | 1  | 16 | 51  | 59  | 19 | -9 | 7 |
| 16 | 250 | 223 | 11   | -5   | 5   | 17 | 0   | 20  | 1    | -1   | 4   | 18 | 120 | 108 | 8    | -7   | 8   | 15 | 69  | 77  | 34 | -10 | 1  | 16 | 103 | 102 | 8  | 2  | 6 |
| 16 | 78  | 74  | 17   | -7   | 5   | 17 | 0   | 13  | 1    | -3   | 4   | 18 | 124 | 127 | 6    | -9   | 5   | 15 | 82  | 85  | 10 | -9  | 1  | 16 | 153 | 159 | 5  | 3  | 6 |
| 16 | 0   | 48  | 1    | -6   | 5   | 17 | 191 | 185 | 5    | -2   | 4   | 18 | 60  | 47  | 18   | -8   | 5   | 15 | 38  | 43  | 19 | -8  | 1  | 16 | 51  | 59  | 19 | -9 | 7 |
| 16 | 250 | 223 | 11   | -5   | 5   | 17 | 0   | 20  | 1    | -1   | 4   | 18 | 120 | 108 | 8    | -7   | 5   | 15 | 40  | 33  | 39 | -7  | 1  | 16 | 0   | 13  | 1  | -8 | 7 |
| 16 | 270 | 265 | 7    | -4   | 5   | 17 | 0   | 10  | 1    | 0    | 4   | 18 | 86  | 102 | 11   | -6   | 5   | 15 | 0   | 44  | 1  | -6  | 1  | 16 | 120 | 126 | 5  | -7 | 7 |
| 16 | 143 | 118 | 9    | -3   | 5   | 17 | 107 | 107 | 7    | 1    | 4   | 18 | 136 | 132 | 11   | -5   | 5   | 15 | 73  | 61  | 7  | -5  | 1  | 16 | 242 | 247 | 4  | -6 | 7 |
| 16 | 352 | 359 | 8    | -2   | 5   | 17 | 96  | 89  | 7    | -8   | 5   | 18 | 165 | 178 | 11   | -4   | 5   | 15 | 137 | 131 | 4  | -4  | 1  | 16 | 144 | 139 | 10 | -5 | 7 |

|     |   |    |     |     |    |     |   |    |     |     |    |     |   |    |     |     |    |    |   |    |     |     |    |    |   |    |     |     |    |
|-----|---|----|-----|-----|----|-----|---|----|-----|-----|----|-----|---|----|-----|-----|----|----|---|----|-----|-----|----|----|---|----|-----|-----|----|
| -4  | 5 | 15 | 137 | 131 | 4  | -4  | 1 | 16 | 144 | 139 | 10 | -5  | 7 | 16 | 238 | 237 | 4  | -1 | 5 | 17 | 44  | 5   | 19 | -7 | 5 | 18 | 254 | 258 | 6  |
| -3  | 5 | 15 | 121 | 125 | 4  | -3  | 1 | 16 | 280 | 299 | 4  | -4  | 7 | 16 | 61  | 36  | 12 | 0  | 5 | 17 | 0   | 15  | 1  | -6 | 5 | 18 | 86  | 83  | 12 |
| -2  | 5 | 15 | 116 | 109 | 6  | -2  | 1 | 16 | 61  | 59  | 14 | -3  | 7 | 16 | 379 | 376 | 5  | 1  | 5 | 17 | 68  | 43  | 16 | -5 | 5 | 18 | 220 | 232 | 5  |
| -1  | 5 | 15 | 31  | 8   | 31 | -1  | 1 | 16 | 183 | 191 | 7  | -2  | 7 | 16 | 206 | 203 | 5  | 2  | 5 | 17 | 22  | 26  | 22 | -4 | 5 | 18 | 104 | 110 | 9  |
| 0   | 5 | 15 | 109 | 116 | 6  | 0   | 1 | 16 | 53  | 57  | 16 | -1  | 7 | 16 | 102 | 83  | 9  | -8 | 6 | 17 | 31  | 41  | 30 | -3 | 5 | 18 | 0   | 8   | 1  |
| 1   | 5 | 15 | 59  | 51  | 11 | 1   | 1 | 16 | 143 | 138 | 5  | 0   | 7 | 16 | 263 | 253 | 5  | -7 | 6 | 17 | 277 | 283 | 6  | -2 | 5 | 18 | 81  | 92  | 10 |
| 2   | 5 | 15 | 74  | 55  | 10 | 2   | 1 | 16 | 43  | 27  | 24 | 1   | 7 | 16 | 93  | 85  | 10 | -6 | 6 | 17 | 154 | 151 | 17 | -1 | 5 | 18 | 33  | 60  | 32 |
| 3   | 5 | 15 | 78  | 93  | 14 | 3   | 1 | 16 | 73  | 70  | 11 | 2   | 7 | 16 | 190 | 180 | 7  | -5 | 6 | 17 | 161 | 161 | 8  | 0  | 5 | 18 | 0   | 33  | 1  |
| 4   | 5 | 15 | 0   | 37  | 1  | 4   | 1 | 16 | 87  | 80  | 12 | -8  | 8 | 16 | 266 | 251 | 11 | -4 | 6 | 17 | 297 | 303 | 4  | -7 | 6 | 18 | 88  | 76  | 28 |
| -10 | 6 | 15 | 111 | 127 | 19 | -11 | 2 | 16 | 40  | 32  | 39 | -7  | 8 | 16 | 155 | 137 | 9  | -3 | 6 | 17 | 136 | 129 | 6  | -6 | 6 | 18 | 94  | 62  | 9  |
| -9  | 6 | 15 | 33  | 20  | 32 | -10 | 2 | 16 | 4   | 39  | 4  | -6  | 8 | 16 | 124 | 111 | 12 | -2 | 6 | 17 | 256 | 264 | 5  | -5 | 6 | 18 | 73  | 84  | 13 |
| -8  | 6 | 15 | 153 | 157 | 8  | -9  | 2 | 16 | 85  | 78  | 7  | -5  | 8 | 16 | 149 | 162 | 6  | -1 | 6 | 17 | 400 | 393 | 12 | -4 | 6 | 18 | 21  | 29  | 20 |
| -7  | 6 | 15 | 121 | 125 | 5  | -8  | 2 | 16 | 261 | 259 | 4  | -4  | 8 | 16 | 103 | 112 | 9  | 0  | 6 | 17 | 146 | 170 | 6  | -3 | 6 | 18 | 18  | 55  | 17 |
| -6  | 6 | 15 | 100 | 101 | 7  | -7  | 2 | 16 | 38  | 39  | 20 | -3  | 8 | 16 | 37  | 12  | 30 | 1  | 6 | 17 | 108 | 120 | 13 | -2 | 6 | 18 | 107 | 110 | 9  |
| -5  | 6 | 15 | 282 | 278 | 5  | -6  | 2 | 16 | 28  | 38  | 28 | -2  | 8 | 16 | 142 | 148 | 6  | -7 | 7 | 17 | 66  | 62  | 21 | -1 | 6 | 18 | 129 | 118 | 8  |
| -4  | 6 | 15 | 205 | 205 | 4  | -5  | 2 | 16 | 345 | 339 | 6  | -1  | 8 | 16 | 209 | 216 | 5  | -6 | 7 | 17 | 101 | 95  | 10 | -5 | 7 | 18 | 36  | 39  | 36 |
| -3  | 6 | 15 | 231 | 239 | 3  | -4  | 2 | 16 | 34  | 21  | 33 | 0   | 8 | 16 | 83  | 74  | 13 | -5 | 7 | 17 | 83  | 100 | 12 | -4 | 7 | 18 | 43  | 14  | 43 |
| -2  | 6 | 15 | 141 | 144 | 4  | -3  | 2 | 16 | 66  | 55  | 9  | 1   | 8 | 16 | 113 | 103 | 14 | -4 | 7 | 17 | 50  | 53  | 20 | -3 | 7 | 18 | 156 | 172 | 7  |
| -1  | 6 | 15 | 120 | 115 | 7  | -2  | 2 | 16 | 312 | 303 | 4  | -6  | 9 | 16 | 123 | 137 | 9  | -3 | 7 | 17 | 0   | 21  | 1  | -2 | 7 | 18 | 88  | 101 | 11 |
| 0   | 6 | 15 | 160 | 164 | 6  | -1  | 2 | 16 | 89  | 81  | 7  | -5  | 9 | 16 | 215 | 211 | 8  | -2 | 7 | 17 | 118 | 106 | 8  | -8 | 1 | 19 | 93  | 52  | 25 |
| 1   | 6 | 15 | 57  | 54  | 11 | 0   | 2 | 16 | 132 | 115 | 5  | -4  | 9 | 16 | 66  | 19  | 15 | -1 | 7 | 17 | 25  | 16  | 25 | -7 | 1 | 19 | 245 | 247 | 7  |
| 2   | 6 | 15 | 73  | 71  | 12 | 1   | 2 | 16 | 228 | 224 | 5  | -3  | 9 | 16 | 209 | 202 | 19 | 0  | 7 | 17 | 11  | 21  | 10 | -6 | 1 | 19 | 56  | 57  | 38 |
| 3   | 6 | 15 | 227 | 227 | 13 | 2   | 2 | 16 | 144 | 141 | 15 | -2  | 9 | 16 | 126 | 123 | 18 | -6 | 8 | 17 | 23  | 21  | 23 | -5 | 1 | 19 | 42  | 14  | 42 |
| 4   | 6 | 15 | 49  | 41  | 49 | 3   | 2 | 16 | 154 | 154 | 6  | -1  | 9 | 16 | 187 | 192 | 9  | -5 | 8 | 17 | 158 | 155 | 10 | -4 | 1 | 19 | 209 | 220 | 7  |
| -9  | 7 | 15 | 48  | 79  | 48 | 4   | 2 | 16 | 191 | 189 | 9  | -10 | 1 | 17 | 66  | 36  | 14 | -4 | 8 | 17 | 181 | 178 | 8  | -3 | 1 | 19 | 54  | 17  | 53 |
| -8  | 7 | 15 | 62  | 90  | 25 | -11 | 3 | 16 | 170 | 145 | 14 | -9  | 1 | 17 | 33  | 27  | 32 |    |   |    |     |     |    |    |   |    |     |     |    |

```

-2 7 15 18 35 18 -5 3 16 209 208 11 -3 1
17 116 107 9 -6 0 18 310 316 7 -5 2 19 110
114 10
-1 7 15 140 153 9 -4 3 16 319 319 3 -2 1
17 93 95 8 -5 0 18 321 312 6 -4 2 19 0
44 1
0 7 15 196 205 4 -3 3 16 224 230 4 -1 1
17 170 171 5 -4 0 18 223 226 6 -3 2 19 135
134 9
1 7 15 56 54 11 -2 3 16 280 279 4 0 1
17 156 171 5 -3 0 18 617 593 11 -2 2 19 85
108 16
2 7 15 258 265 6 -1 3 16 102 105 8 1 1
17 15 33 14 -2 0 18 176 176 7 -1 2 19 88
100 14
3 7 15 5 55 5 0 3 16 403 404 5 2 1
17 211 209 5 -1 0 18 340 349 8 0 2 19 0
15 1
-9 8 15 166 132 14 1 3 16 178 174 5 3 1
17 39 12 38 0 0 18 330 311 11 -8 3 19 78
88 17
-8 8 15 0 24 1 2 3 16 0 24 1 -10 2
17 46 56 21 1 0 18 323 335 12 -7 3 19 0
15 1
-7 8 15 51 21 50 3 3 16 306 287 6 -9 2
17 65 28 13 2 0 18 0 65 1 -6 3 19 0
7 1
-6 8 15 0 58 1 4 3 16 143 143 16 -8 2
17 0 30 1 -9 1 18 77 63 10 -5 3 19 76
71 28
-5 8 15 59 47 11 -10 4 16 30 87 30 -7 2
17 235 238 4 -8 1 18 27 10 26 -4 3 19 99
104 13
-4 8 15 16 6 15 -9 4 16 23 14 23 -6 2
17 236 230 7 -7 1 18 162 163 5 -3 3 19 139
133 9
-3 8 15 67 76 21 -8 4 16 26 15 25 -5 2
17 169 174 9 -6 1 18 132 142 6 -2 3 19 113
111 10
-2 8 15 0 12 1 -7 4 16 60 5 14 -4 2
17 438 431 5 -5 1 18 54 53 14 -1 3 19 103
89 14
-1 8 15 151 141 12 -6 4 16 112 116 7 -3 2
17 251 260 7 -4 1 18 74 43 10 0 3 19 186
167 9
0 8 15 200 199 5 -5 4 16 48 11 19 -2 2
17 155 159 6 -3 1 18 94 101 8 -7 4 19 104
131 11
1 8 15 97 55 12 -4 4 16 33 67 33 -1 2
17 358 345 5 -2 1 18 75 74 12 -6 4 19 0
31 1
2 8 15 47 22 29 -3 4 16 95 86 6 0 2
17 76 68 10 -1 1 18 83 66 9 -5 4 19 322
320 8
-7 9 15 292 289 11 -2 4 16 54 60 13 1 2
17 94 91 9 0 1 18 80 57 14 -4 4 19 206
193 6
-6 9 15 93 71 14 -1 4 16 244 246 3 2 2
17 200 203 6 1 1 18 24 26 23 -3 4 19 121
126 11
-5 9 15 125 130 9 0 4 16 47 34 17 3 2
17 139 124 11 2 1 18 31 28 30 -2 4 19 319
303 7
-4 9 15 279 286 6 1 4 16 0 19 1 -10 3
17 207 201 7 -9 2 18 301 285 6 -1 4 19 141
143 7
-3 9 15 152 156 6 2 4 16 78 53 13 -9 3
17 109 110 7 -8 2 18 121 128 9 -6 5 19 59
25 27
-2 9 15 0 28 1 3 4 16 89 107 12 -8 3
17 180 182 10 -7 2 18 193 197 6 -5 5 19 47
22 37
-1 9 15 285 284 6 4 4 16 121 109 21 -7 3
17 152 155 8 -6 2 18 209 212 5 -4 5 19 12
51 12
0 9 15 126 133 8 -10 5 16 244 239 12 -6 3
17 90 92 9 -5 2 18 278 279 5 -3 5 19 50
67 24
1 9 15 101 108 14 -9 5 16 374 371 8 -5 3
17 160 166 5 -4 2 18 231 233 5 -2 5 19 51
31 22

```

Table 7. Observed and calculated structure factors for **3f**

Page 11

h k l 10Fo 10Fc 10s    h k l 10Fo 10Fc 10s    h k l  
 10Fo 10Fc 10s    h k l 10Fo 10Fc 10s    h k l 10Fo  
 10Fc 10s

|    |     |     |     |     |    |    |     |     |    |    |    |    |   |
|----|-----|-----|-----|-----|----|----|-----|-----|----|----|----|----|---|
| -6 | 0   | 20  | 301 | 299 | 12 | -2 | 0   | 20  | 83 | 62 | 25 | -3 | 1 |
| 20 | 187 | 188 | 16  | -4  | 2  | 20 | 179 | 173 | 9  |    |    |    |   |
| -5 | 0   | 20  | 0   | 21  | 1  | -6 | 1   | 20  | 39 | 36 | 39 | -2 | 1 |
| 20 | 105 | 97  | 18  | -3  | 2  | 20 | 36  | 27  | 36 |    |    |    |   |
| -4 | 0   | 20  | 263 | 252 | 11 | -5 | 1   | 20  | 82 | 98 | 18 | -6 | 2 |
| 20 | 20  | 47  | 19  | -5  | 3  | 20 | 173 | 178 | 8  |    |    |    |   |
| -3 | 0   | 20  | 0   | 19  | 1  | -4 | 1   | 20  | 67 | 62 | 22 | -5 | 2 |
| 20 | 169 | 163 | 9   | -4  | 3  | 20 | 47  | 69  | 42 |    |    |    |   |
